# Supplementary material
Source: publisher figshare collection journal article supplement (https://tandf.figshare.com/articles/dataset/_/7418354)
Supplement: Supplementary file 1 [file 1]

Data File: 13  
Sample ID: 1  
Comments:  
Low Mass(m/z): 50

Injection Volume(µl): 1.00  
Run Time(min): 28.10  
Scans: 8261  
High Mass(m/z): 500

RT: 4.00 - 32.00 SM: 15G

NL:  
3.00E9  
TIC MS 13

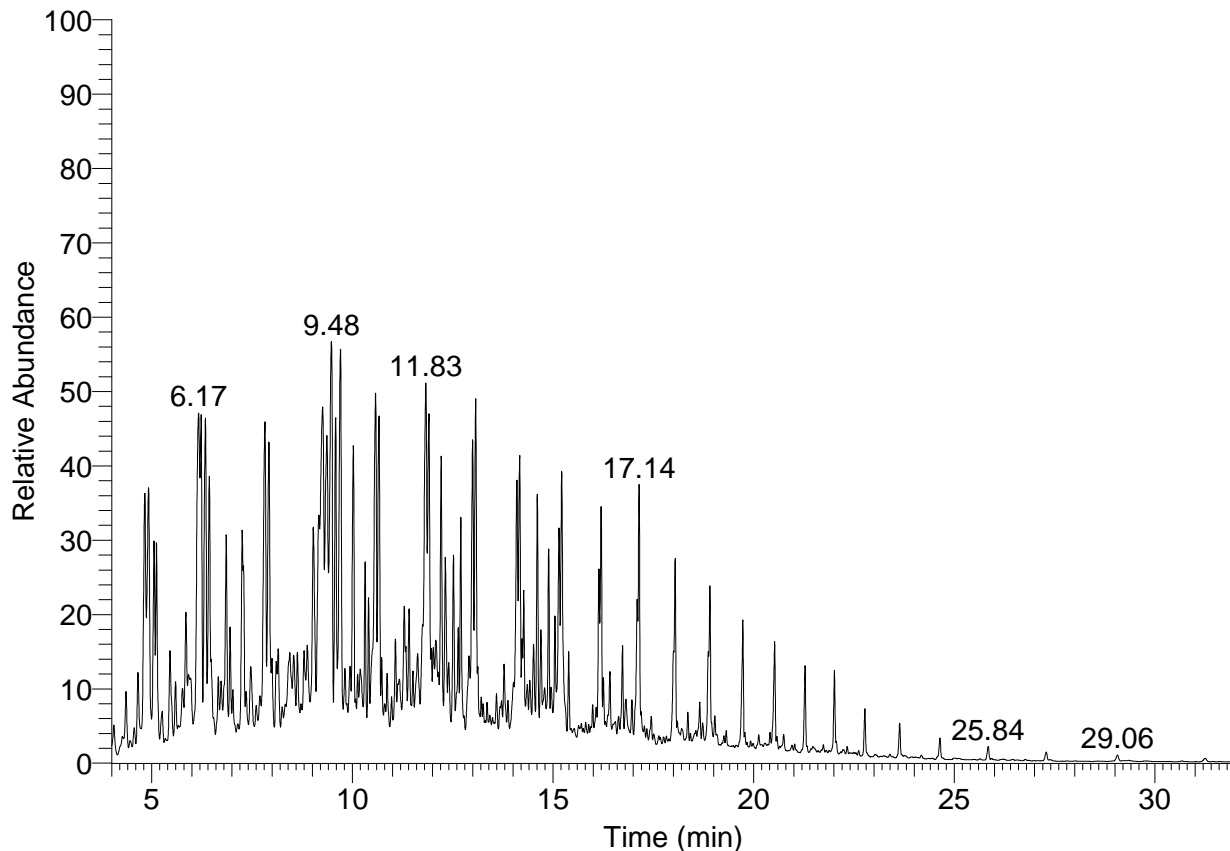

| RT   | Compound Name                         | Area       | Area % | RSI | Cas #      | Library |
|------|---------------------------------------|------------|--------|-----|------------|---------|
| 4.83 | Decyl trifluoroacetate                | 3292076330 | 2.18   | 950 | 333-88-0   | mainlib |
| RT   | Compound Name                         | Area       | Area % | RSI | Cas #      | Library |
| 4.92 | 1-Octanol, 2-butyl-                   | 3659660952 | 2.43   | 941 | 3913-02-8  | mainlib |
| RT   | Compound Name                         | Area       | Area % | RSI | Cas #      | Library |
| 5.06 | Oxalic acid, 2-ethylhexyl hexyl ester | 2061966047 | 1.37   | 934 | NA         | mainlib |
| RT   | Compound Name                         | Area       | Area % | RSI | Cas #      | Library |
| 5.12 | Oxalic acid, 2-ethylhexyl hexyl ester | 2068922508 | 1.37   | 932 | NA         | mainlib |
| RT   | Compound Name                         | Area       | Area % | RSI | Cas #      | Library |
| 6.17 | Cyclopentane, 1-butyl-2-propyl-       | 5568198181 | 3.70   | 880 | 62199-50-2 | mainlib |
| RT   | Compound Name                         | Area       | Area % | RSI | Cas #      | Library |
| 6.23 | 5-Ethyl-1-nonene                      | 3584675481 | 2.38   | 898 | 19780-74-6 | mainlib |
| RT   | Compound Name                         | Area       | Area % | RSI | Cas #      | Library |
| 6.34 | E-11,13-Tetradecadien-1-ol            | 4194071753 | 2.78   | 967 | NA         | mainlib |
| RT   | Compound Name                         | Area       | Area % | RSI | Cas #      | Library |
| 6.44 | Undecane                              | 3962683466 | 2.63   | 972 | 1120-21-4  | mainlib |
| RT   | Compound Name                         | Area       | Area % | RSI | Cas #      | Library |
| 6.86 | 1-Dodecanol, 3,7,11-trimethyl-        | 2803781304 | 1.86   | 924 | 6750-34-1  | mainlib |

Analysed By:

Checked By:

| RT    | Compound Name                              | Area       | Area % | RSI | Cas #       | Library |
|-------|--------------------------------------------|------------|--------|-----|-------------|---------|
| 6.95  | 1-Dodecanol, 3,7,11-trimethyl-             | 1095699316 | 0.73   | 940 | 6750-34-1   | mainlib |
| RT    | Compound Name                              | Area       | Area % | RSI | Cas #       | Library |
| 7.25  | 4-Nonene, 3-methyl-, (Z)-                  | 3428099098 | 2.27   | 879 | 63830-69-3  | mainlib |
| RT    | Compound Name                              | Area       | Area % | RSI | Cas #       | Library |
| 7.82  | Cyclododecane                              | 4637415639 | 3.08   | 952 | 294-62-2    | mainlib |
| RT    | Compound Name                              | Area       | Area % | RSI | Cas #       | Library |
| 7.92  | Dodecane                                   | 4148834202 | 2.75   | 984 | 112-40-3    | mainlib |
| RT    | Compound Name                              | Area       | Area % | RSI | Cas #       | Library |
| 9.02  | Trichloroacetic acid, pentadecyl ester     | 2563756349 | 1.70   | 904 | 74339-53-0  | mainlib |
| RT    | Compound Name                              | Area       | Area % | RSI | Cas #       | Library |
| 9.16  | 10-Heneicosene (c,t)                       | 2065147344 | 1.37   | 953 | 95008-11-0  | mainlib |
| RT    | Compound Name                              | Area       | Area % | RSI | Cas #       | Library |
| 9.25  | 1-Tridecene                                | 4024324226 | 2.67   | 974 | 2437-56-1   | mainlib |
| RT    | Compound Name                              | Area       | Area % | RSI | Cas #       | Library |
| 9.37  | 10-Methylnonadecane                        | 2800125743 | 1.86   | 936 | 56862-62-5  | mainlib |
| RT    | Compound Name                              | Area       | Area % | RSI | Cas #       | Library |
| 9.48  | Trifluoroacetic acid, pentadecyl ester     | 5996302173 | 3.98   | 902 | 959010-23-2 | mainlib |
| RT    | Compound Name                              | Area       | Area % | RSI | Cas #       | Library |
| 9.58  | 1-Decanol, 2-hexyl-                        | 3420962043 | 2.27   | 916 | 2425-77-6   | mainlib |
| RT    | Compound Name                              | Area       | Area % | RSI | Cas #       | Library |
| 9.71  | Dichloroacetic acid, 6-ethyl-3-octyl ester | 5837778482 | 3.87   | 882 | NA          | mainlib |
| RT    | Compound Name                              | Area       | Area % | RSI | Cas #       | Library |
| 10.03 | 3-Eicosene, (E)-                           | 3340221279 | 2.22   | 909 | 74685-33-9  | mainlib |
| RT    | Compound Name                              | Area       | Area % | RSI | Cas #       | Library |
| 10.32 | 10-Heneicosene (c,t)                       | 1402821131 | 0.93   | 932 | 95008-11-0  | mainlib |
| RT    | Compound Name                              | Area       | Area % | RSI | Cas #       | Library |
| 10.40 | 1,16-Hexadecanediol                        | 920715705  | 0.61   | 866 | 7735-42-4   | mainlib |
| RT    | Compound Name                              | Area       | Area % | RSI | Cas #       | Library |
| 10.58 | 1-Tetradecene                              | 5410424752 | 3.59   | 981 | 1120-36-1   | mainlib |
| RT    | Compound Name                              | Area       | Area % | RSI | Cas #       | Library |
| 10.66 | Tetradecane                                | 3804973538 | 2.53   | 984 | 629-59-4    | mainlib |
| RT    | Compound Name                              | Area       | Area % | RSI | Cas #       | Library |
| 11.29 | 10-Methylnonadecane                        | 1681891823 | 1.12   | 934 | 56862-62-5  | mainlib |
| RT    | Compound Name                              | Area       | Area % | RSI | Cas #       | Library |
| 11.41 | 2-Hexyl-1-octanol                          | 1022867847 | 0.68   | 928 | 19780-79-1  | mainlib |
| RT    | Compound Name                              | Area       | Area % | RSI | Cas #       | Library |
| 11.83 | Trifluoroacetic acid, pentadecyl ester     | 6158870340 | 4.09   | 975 | 959010-23-2 | mainlib |
| RT    | Compound Name                              | Area       | Area % | RSI | Cas #       | Library |
| 11.91 | Pentadecane                                | 3994681734 | 2.65   | 968 | 629-62-9    | mainlib |
| RT    | Compound Name                              | Area       | Area % | RSI | Cas #       | Library |
| 12.21 | 1-Dodecanol, 3,7,11-trimethyl-             | 2695952813 | 1.79   | 925 | 6750-34-1   | mainlib |
| RT    | Compound Name                              | Area       | Area % | RSI | Cas #       | Library |
| 12.31 | Trichloroacetic acid, hexadecyl ester      | 1831951594 | 1.22   | 923 | 74339-54-1  | mainlib |

*Analysed By:*

*Checked By:*

| RT    | Compound Name                                    | Area       | Area % | RSI | Cas #       | Library |
|-------|--------------------------------------------------|------------|--------|-----|-------------|---------|
| 12.52 | 1-Dodecanol, 3,7,11-trimethyl-                   | 1679379289 | 1.11   | 936 | 6750-34-1   | mainlib |
| RT    | Compound Name                                    | Area       | Area % | RSI | Cas #       | Library |
| 12.70 | Trichloroacetic acid, tetradecyl ester           | 2146033589 | 1.42   | 857 | 74339-52-9  | mainlib |
| RT    | Compound Name                                    | Area       | Area % | RSI | Cas #       | Library |
| 13.00 | Cyclohexadecane                                  | 3622733210 | 2.40   | 981 | 295-65-8    | mainlib |
| RT    | Compound Name                                    | Area       | Area % | RSI | Cas #       | Library |
| 13.07 | Decane, 2,4,6-trimethyl-                         | 4317767725 | 2.87   | 937 | 62108-27-4  | mainlib |
| RT    | Compound Name                                    | Area       | Area % | RSI | Cas #       | Library |
| 14.10 | E-14-Hexadecenal                                 | 3560927978 | 2.36   | 981 | 330207-53-9 | mainlib |
| RT    | Compound Name                                    | Area       | Area % | RSI | Cas #       | Library |
| 14.17 | Heptadecane                                      | 3108859932 | 2.06   | 970 | 629-78-7    | mainlib |
| RT    | Compound Name                                    | Area       | Area % | RSI | Cas #       | Library |
| 14.27 | Nonadecyl pentafluoropropionate                  | 1518131799 | 1.01   | 892 | NA          | mainlib |
| RT    | Compound Name                                    | Area       | Area % | RSI | Cas #       | Library |
| 14.61 | 1-Dodecanol, 2-hexyl-                            | 2131474151 | 1.41   | 924 | 110225-00-8 | mainlib |
| RT    | Compound Name                                    | Area       | Area % | RSI | Cas #       | Library |
| 14.89 | 1-Dodecanol, 2-hexyl-                            | 1517211604 | 1.01   | 933 | 110225-00-8 | mainlib |
| RT    | Compound Name                                    | Area       | Area % | RSI | Cas #       | Library |
| 15.05 | Dodecane, 1-cyclopentyl-4-(3-cyclopentylpropyl)- | 874079911  | 0.58   | 882 | 7225-68-5   | mainlib |
| RT    | Compound Name                                    | Area       | Area % | RSI | Cas #       | Library |
| 15.15 | 10-Heneicosene (c,t)                             | 2409972010 | 1.60   | 982 | 95008-11-0  | mainlib |
| RT    | Compound Name                                    | Area       | Area % | RSI | Cas #       | Library |
| 15.22 | Eicosane                                         | 3680539172 | 2.44   | 969 | 112-95-8    | mainlib |
| RT    | Compound Name                                    | Area       | Area % | RSI | Cas #       | Library |
| 16.14 | 1-Heneicosanol                                   | 1539463410 | 1.02   | 984 | 15594-90-8  | mainlib |
| RT    | Compound Name                                    | Area       | Area % | RSI | Cas #       | Library |
| 16.20 | Eicosane                                         | 2626909217 | 1.74   | 983 | 112-95-8    | mainlib |
| RT    | Compound Name                                    | Area       | Area % | RSI | Cas #       | Library |
| 17.14 | 2-methylhexacosane                               | 4086590346 | 2.71   | 957 | NA          | mainlib |
| RT    | Compound Name                                    | Area       | Area % | RSI | Cas #       | Library |
| 18.04 | Eicosane                                         | 2891362267 | 1.92   | 982 | 112-95-8    | mainlib |
| RT    | Compound Name                                    | Area       | Area % | RSI | Cas #       | Library |
| 18.91 | Eicosane                                         | 2465669529 | 1.64   | 977 | 112-95-8    | mainlib |
| RT    | Compound Name                                    | Area       | Area % | RSI | Cas #       | Library |
| 19.73 | Eicosane                                         | 1640671809 | 1.09   | 975 | 112-95-8    | mainlib |
| RT    | Compound Name                                    | Area       | Area % | RSI | Cas #       | Library |
| 20.52 | Eicosane                                         | 1391924842 | 0.92   | 966 | 112-95-8    | mainlib |

## Hit Spectrum

## Delta

## Compound Structure

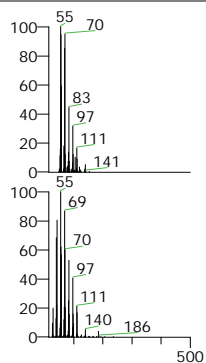

NL: 9.98E2  
13245 4.83 1 11  
22 220-230 260-270  
1.28E8 + c EI Full ms  
[50.00-500.00]

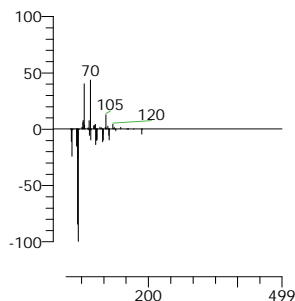

Decyl trifluoroacetate  
Formula C<sub>12</sub>H<sub>21</sub>F<sub>3</sub>O<sub>2</sub>, MW 254, CAS# 333-88-0, Entry# 18827  
Decyl 2,2,2-trifluoroacetate

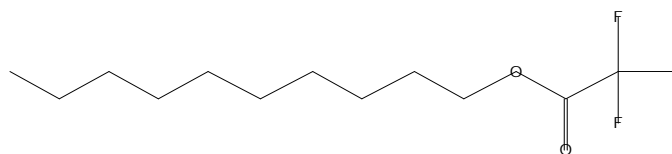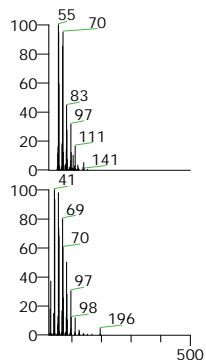

NL: 9.98E2  
13245 4.83 1 11  
22 220-230 260-270  
1.28E8 + c EI Full ms  
[50.00-500.00]

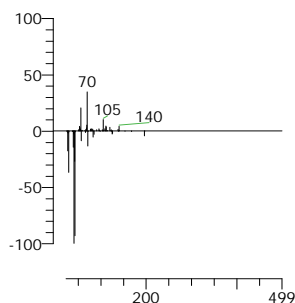

3-Tetradecene, (Z)-  
Formula C<sub>14</sub>H<sub>28</sub>, MW 196, CAS# 41446-67-7, Entry# 2508  
(3Z)-3-Tetradecene

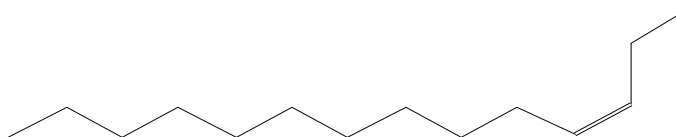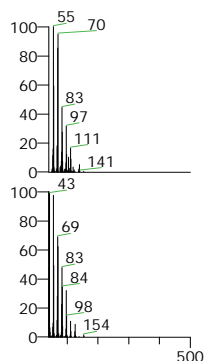

NL: 9.98E2  
13245 4.83 1 11  
22 220-230 260-270  
1.28E8 + c EI Full ms  
[50.00-500.00]

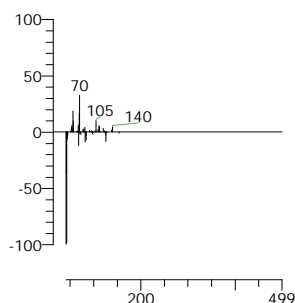

E-11,13-Tetradecadien-1-ol  
Formula C<sub>14</sub>H<sub>26</sub>O, MW 210, CAS# NA, Entry# 2200  
(11E)-11,13-Tetradecadien-1-ol #

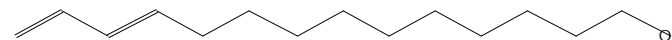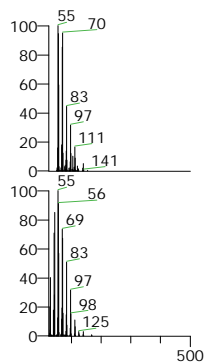

NL: 9.98E2  
13245 4.83 1 11  
22 220-230 260-270  
1.28E8 + c EI Full ms  
[50.00-500.00]

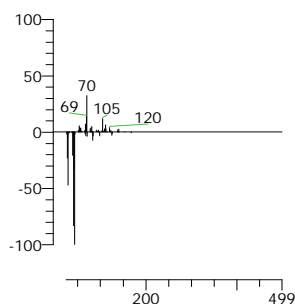

Cyclopropane, nonyl-  
Formula C<sub>12</sub>H<sub>24</sub>, MW 168, CAS# 74663-85-7, Entry# 18566  
Nonylcyclopropane #

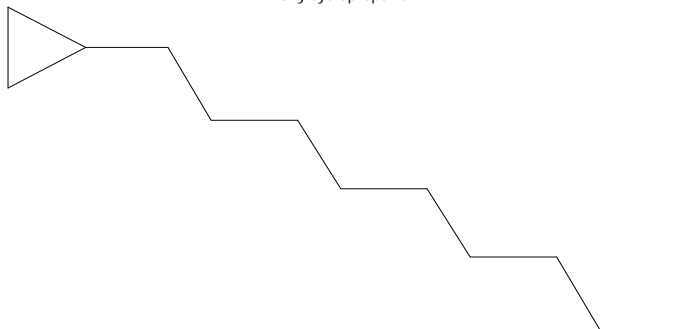

## Hit Spectrum

## Delta

## Compound Structure

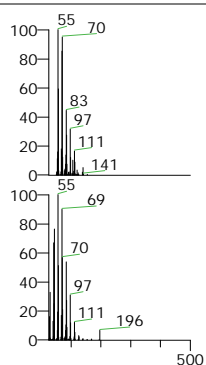

NL: 9.98E2  
13245 4.83 1 11  
22 220-230 260-270  
1.28E8 + c EI Full ms  
[50.00-500.00]

NL: 9.99E2  
SI 912, RSI 945,  
mainlib, Entry# 18831,  
CAS# 41446-60-0,  
7-Tetradecene, (Z)-

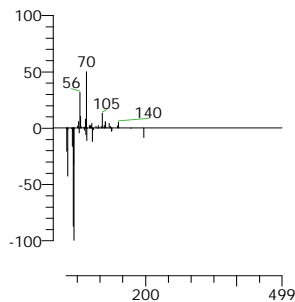

7-Tetradecene, (Z)-  
Formula C14H28, MW 196, CAS# 41446-60-0, Entry# 18831  
(7Z)-7-Tetradecene

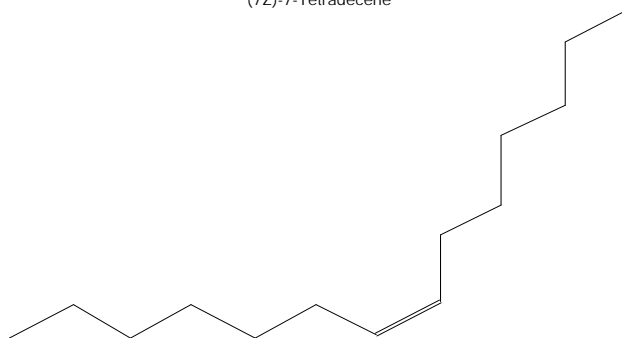

| RT   | Compound Name              | Area       | Area % | RSI | Cas #      | Library |
|------|----------------------------|------------|--------|-----|------------|---------|
| 4.83 | Decyl trifluoroacetate     | 3292076330 | 2.18   | 950 | 333-88-0   | mainlib |
| 4.83 | E-11,13-Tetradecadien-1-ol | 3292076330 | 2.18   | 948 | NA         | mainlib |
| 4.83 | 3-Tetradecene, (Z)-        | 3292076330 | 2.18   | 948 | 41446-67-7 | mainlib |

## Hit Spectrum

## Delta

## Compound Structure

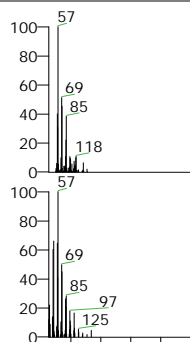

NL: 9.99E2  
13271 4.92 1 11  
22 246-256 286-296  
1.85E8 + c EI Full ms  
[50.00-500.00]

NL: 9.99E2  
SI 829, RSI 941,  
mainlib, Entry# 22453,  
CAS# 3913-02-8,  
1-Octanol, 2-butyl-

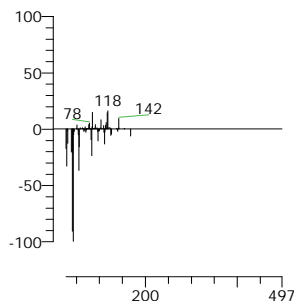

1-Octanol, 2-butyl-  
Formula C<sub>12</sub>H<sub>26</sub>O, MW 186, CAS# 3913-02-8, Entry# 22453  
2-Butyl-1-octanol

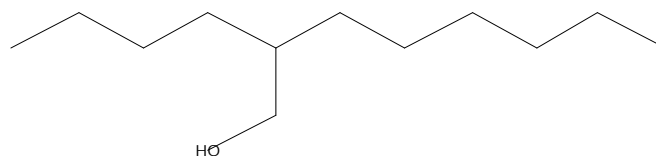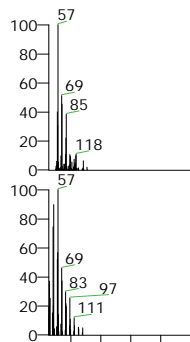

NL: 9.99E2  
13271 4.92 1 11  
22 246-256 286-296  
1.85E8 + c EI Full ms  
[50.00-500.00]

NL: 9.99E2  
SI 788, RSI 935,  
mainlib, Entry# 22393,  
CAS# 10522-26-6,  
2-Methyl-1-undecanol

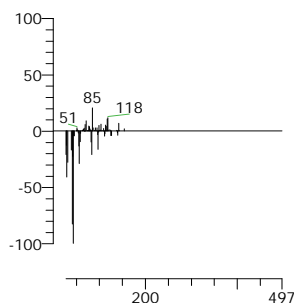

2-Methyl-1-undecanol  
Formula C<sub>12</sub>H<sub>26</sub>O, MW 186, CAS# 10522-26-6, Entry# 22393  
1-Undecanol, 2-methyl-

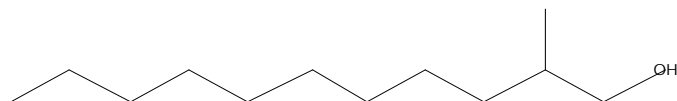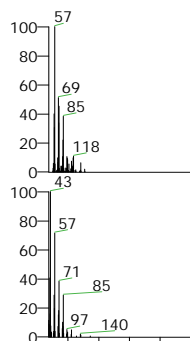

NL: 9.99E2  
13271 4.92 1 11  
22 246-256 286-296  
1.85E8 + c EI Full ms  
[50.00-500.00]

NL: 9.99E2  
SI 772, RSI 932,  
mainlib, Entry# 7242,  
CAS# 29812-79-1,  
Hydroxylamine,  
O-decyl-

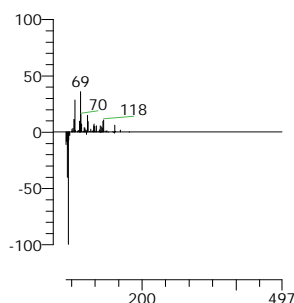

Hydroxylamine, O-decyl-  
Formula C<sub>10</sub>H<sub>23</sub>NO, MW 173, CAS# 29812-79-1, Entry# 7242  
O-Decylhydroxylamine

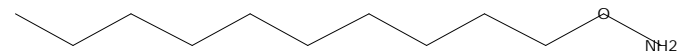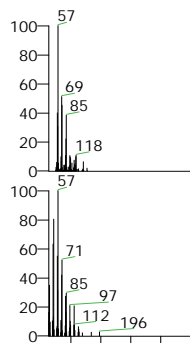

NL: 9.99E2  
13271 4.92 1 11  
22 246-256 286-296  
1.85E8 + c EI Full ms  
[50.00-500.00]

NL: 9.99E2  
SI 800, RSI 930,  
mainlib, Entry# 22406,  
CAS# 19780-79-1,  
2-Hexyl-1-octanol

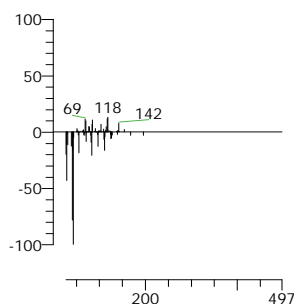

2-Hexyl-1-octanol  
Formula C<sub>14</sub>H<sub>30</sub>O, MW 214, CAS# 19780-79-1, Entry# 22406

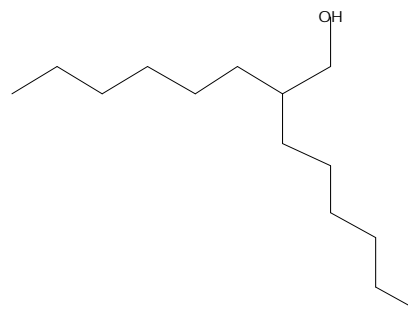

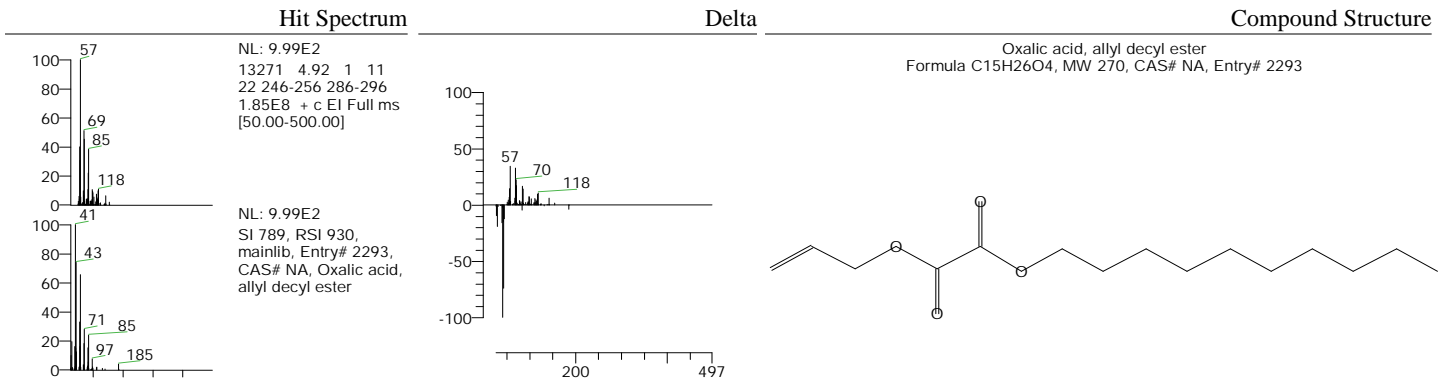

| RT   | Compound Name           | Area       | Area % | RSI | Cas #      | Library |
|------|-------------------------|------------|--------|-----|------------|---------|
| 4.92 | 1-Octanol, 2-butyl-     | 3659660952 | 2.43   | 941 | 3913-02-8  | mainlib |
| 4.92 | 2-Methyl-1-undecanol    | 3659660952 | 2.43   | 935 | 10522-26-6 | mainlib |
| 4.92 | Hydroxylamine, O-decyl- | 3659660952 | 2.43   | 932 | 29812-79-1 | mainlib |

## Hit Spectrum

## Delta

## Compound Structure

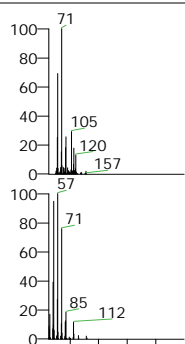

NL: 9.99E2  
13312 5.06 1 11 22  
287-297 327-337  
1.63E8 + c EI Full ms  
[50.00-500.00]

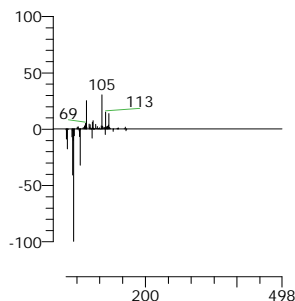

Oxalic acid, 2-ethylhexyl hexyl ester  
Formula C<sub>16</sub>H<sub>30</sub>O<sub>4</sub>, MW 286, CAS# NA, Entry# 22519

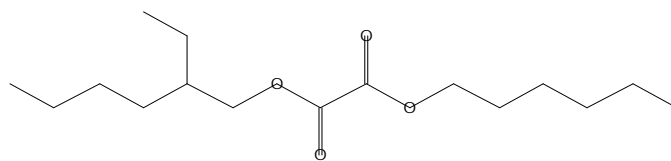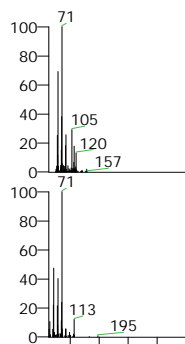

NL: 9.99E2  
13312 5.06 1 11  
22 287-297 327-337  
1.63E8 + c EI Full ms  
[50.00-500.00]

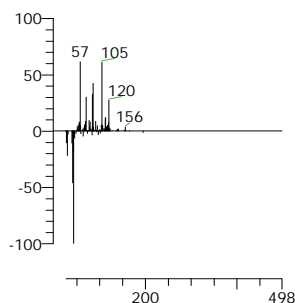

Sulfurous acid, octyl 2-pentyl ester  
Formula C<sub>13</sub>H<sub>28</sub>O<sub>3</sub>S, MW 264, CAS# NA, Entry# 35068

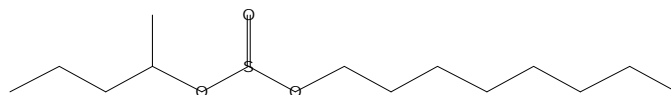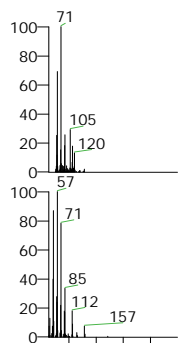

NL: 9.99E2  
13312 5.06 1 11 22  
287-297 327-337  
1.63E8 + c EI Full ms  
[50.00-500.00]

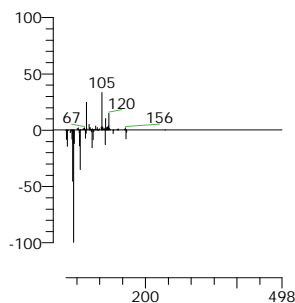

Oxalic acid, 2-ethylhexyl isohexyl ester  
Formula C<sub>16</sub>H<sub>30</sub>O<sub>4</sub>, MW 286, CAS# NA, Entry# 22518

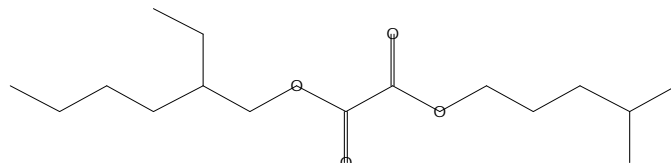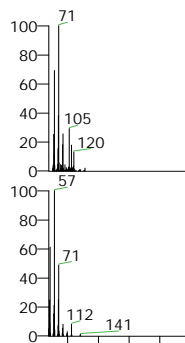

NL: 9.99E2  
13312 5.06 1 11  
22 287-297 327-337  
1.63E8 + c EI Full ms  
[50.00-500.00]

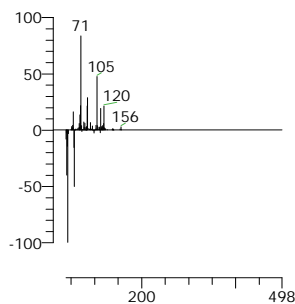

Decane, 2,6,7-trimethyl-  
Formula C<sub>13</sub>H<sub>28</sub>, MW 184, CAS# 62108-25-2, Entry# 22617  
2,6,7-Trimethyldecane #

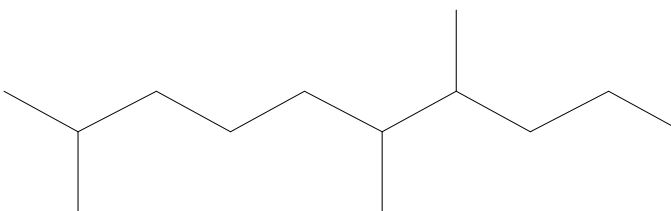



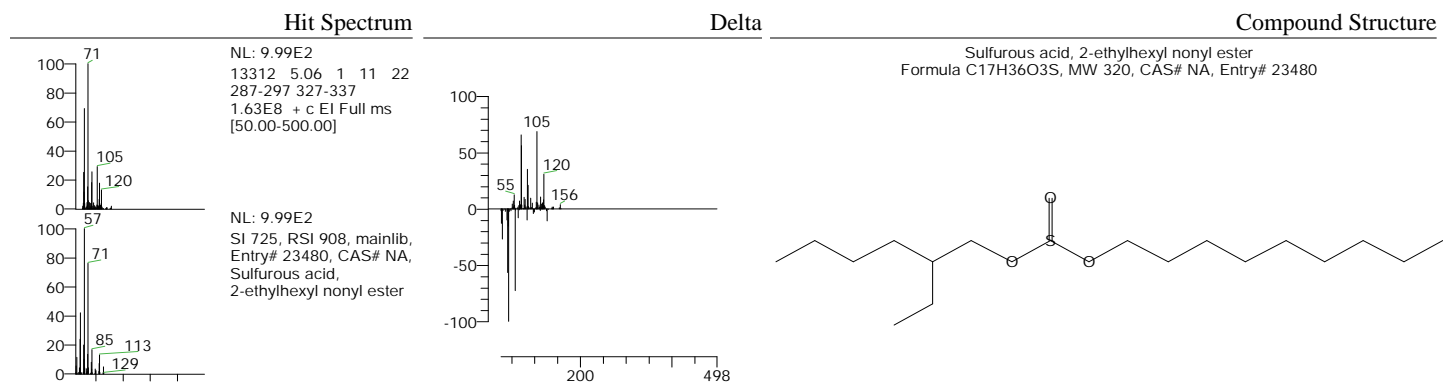

| RT   | Compound Name                            | Area       | Area % | RSI | Cas # | Library |
|------|------------------------------------------|------------|--------|-----|-------|---------|
| 5.06 | Oxalic acid, 2-ethylhexyl hexyl ester    | 2061966047 | 1.37   | 934 | NA    | mainlib |
| 5.06 | Sulfurous acid, octyl 2-pentyl ester     | 2061966047 | 1.37   | 928 | NA    | mainlib |
| 5.06 | Oxalic acid, 2-ethylhexyl isohexyl ester | 2061966047 | 1.37   | 916 | NA    | mainlib |

Analysed By:

Checked By:

## Hit Spectrum

## Delta

## Compound Structure

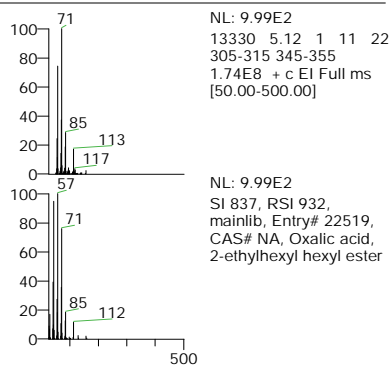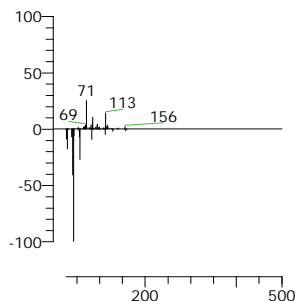

Oxalic acid, 2-ethylhexyl hexyl ester  
Formula C<sub>16</sub>H<sub>30</sub>O<sub>4</sub>, MW 286, CAS# NA, Entry# 22519

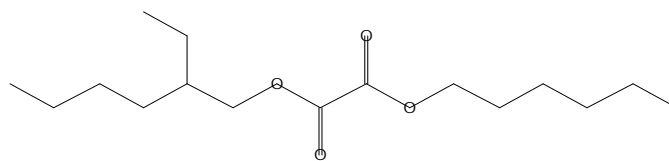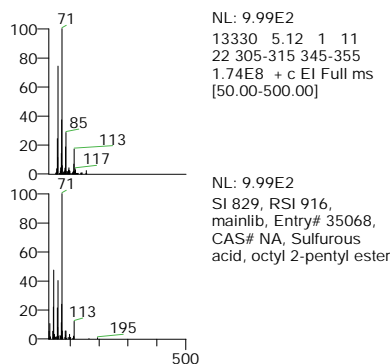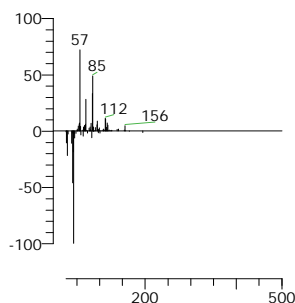

Sulfurous acid, octyl 2-pentyl ester  
Formula C<sub>13</sub>H<sub>28</sub>O<sub>3</sub>S, MW 264, CAS# NA, Entry# 35068

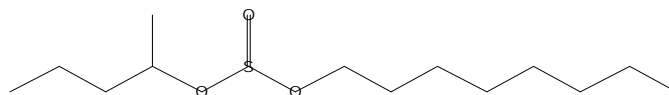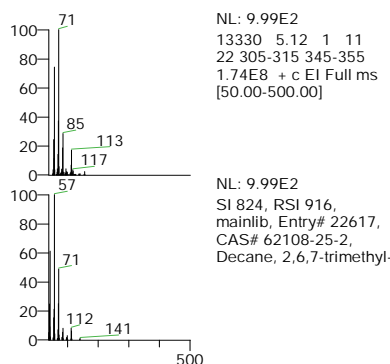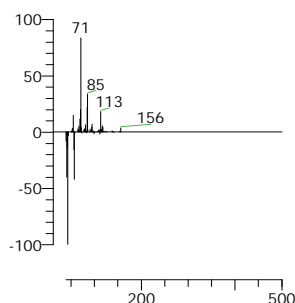

Decane, 2,6,7-trimethyl-  
Formula C<sub>13</sub>H<sub>28</sub>, MW 184, CAS# 62108-25-2, Entry# 22617  
2,6,7-Trimethyldecane #

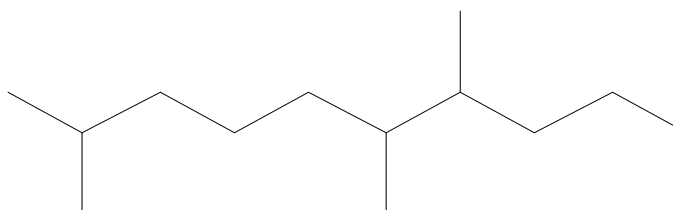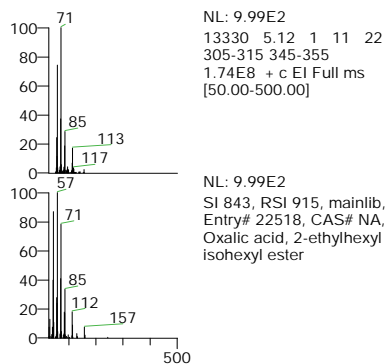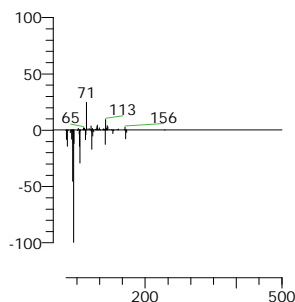

Oxalic acid, 2-ethylhexyl isohexyl ester  
Formula C<sub>16</sub>H<sub>30</sub>O<sub>4</sub>, MW 286, CAS# NA, Entry# 22518

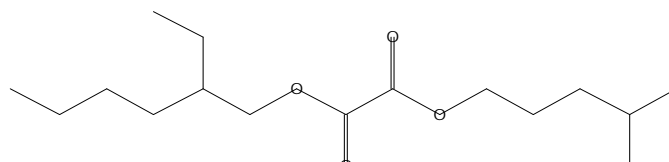

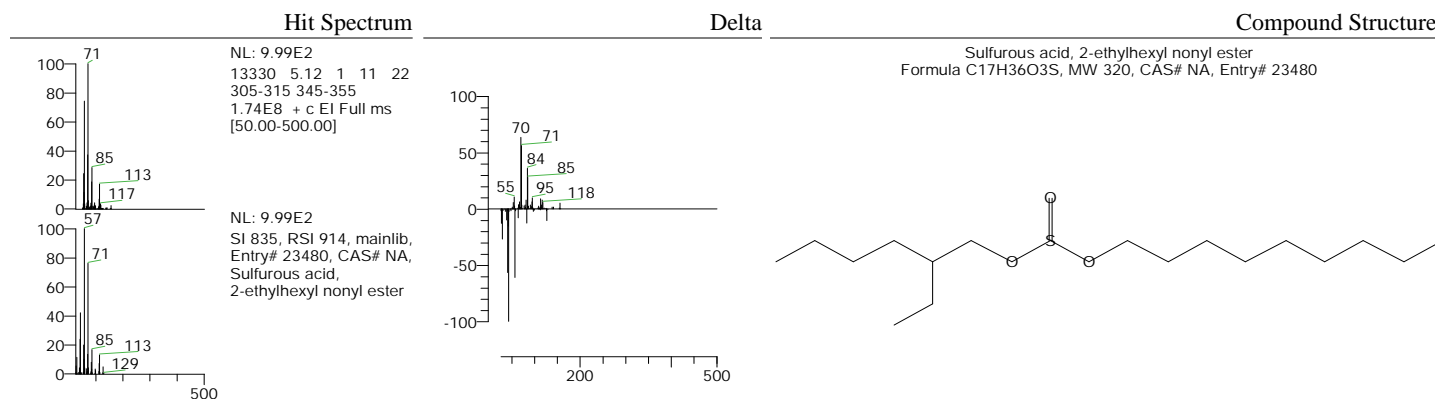

| RT   | Compound Name                         | Area       | Area % | RSI | Cas #      | Library |
|------|---------------------------------------|------------|--------|-----|------------|---------|
| 5.12 | Oxalic acid, 2-ethylhexyl hexyl ester | 2068922508 | 1.37   | 932 | NA         | mainlib |
| 5.12 | Decane, 2,6,7-trimethyl-              | 2068922508 | 1.37   | 916 | 62108-25-2 | mainlib |
| 5.12 | Sulfurous acid, octyl 2-pentyl ester  | 2068922508 | 1.37   | 916 | NA         | mainlib |

## Hit Spectrum

## Delta

## Compound Structure

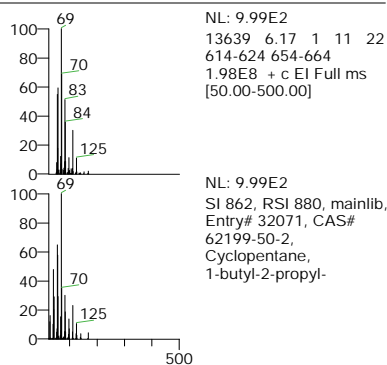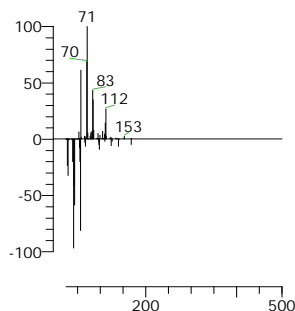

Cyclopentane, 1-butyl-2-propyl-  
Formula C<sub>12</sub>H<sub>24</sub>, MW 168, CAS# 62199-50-2, Entry# 32071  
1-Butyl-2-propylcyclopentane #

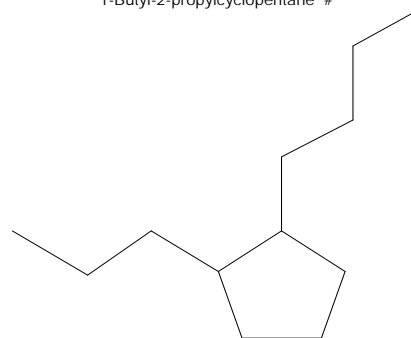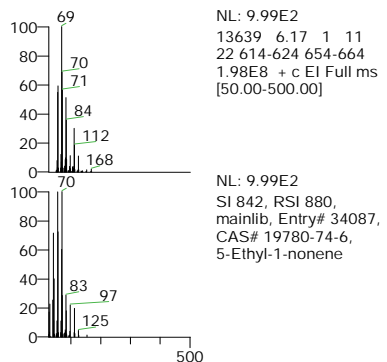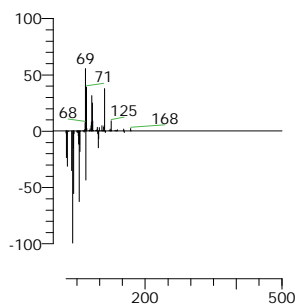

5-Ethyl-1-nonene  
Formula C<sub>11</sub>H<sub>22</sub>, MW 154, CAS# 19780-74-6, Entry# 34087

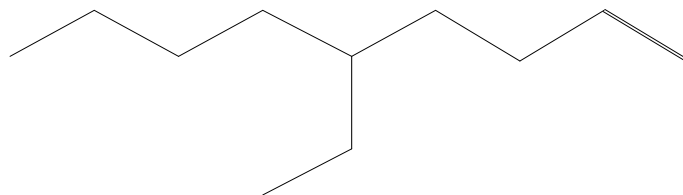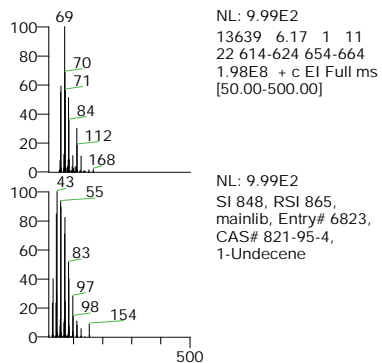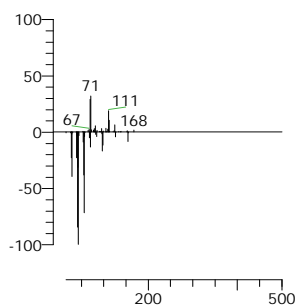

1-Undecene  
Formula C<sub>11</sub>H<sub>22</sub>, MW 154, CAS# 821-95-4, Entry# 6823  
n-1-Undecene

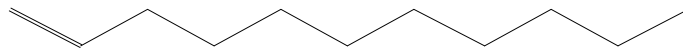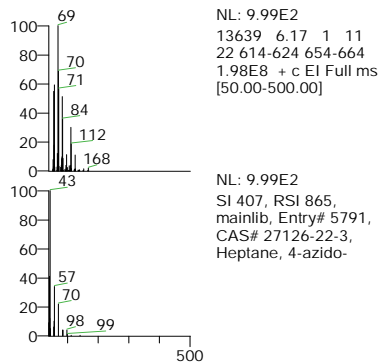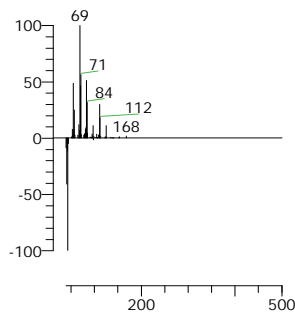

Heptane, 4-azido-  
Formula C<sub>7</sub>H<sub>15</sub>N<sub>3</sub>, MW 141, CAS# 27126-22-3, Entry# 5791  
4-Azidoheptane

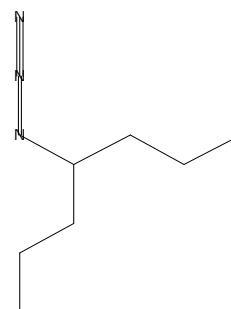

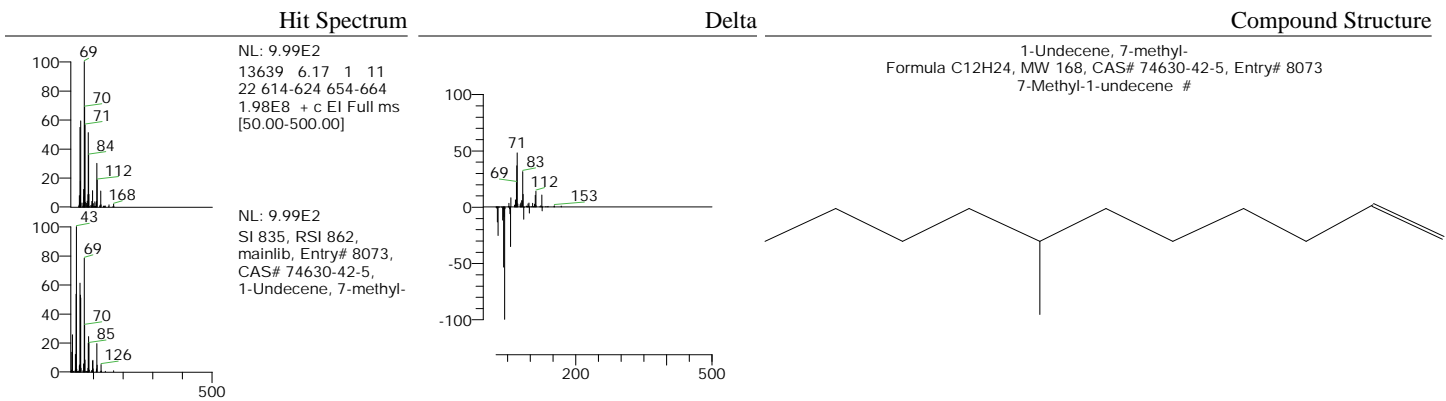

| RT   | Compound Name                   | Area       | Area % | RSI | Cas #      | Library |
|------|---------------------------------|------------|--------|-----|------------|---------|
| 6.17 | 5-Ethyl-1-nonene                | 5568198181 | 3.70   | 880 | 19780-74-6 | mainlib |
| 6.17 | Cyclopentane, 1-butyl-2-propyl- | 5568198181 | 3.70   | 880 | 62199-50-2 | mainlib |
| 6.17 | 1-Undecene                      | 5568198181 | 3.70   | 865 | 821-95-4   | mainlib |

Analysed By:

Checked By:

## Hit Spectrum

## Delta

## Compound Structure

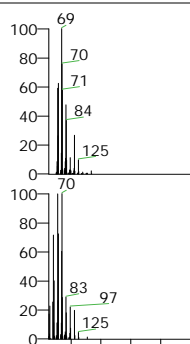

NL: 9.99E2  
13659 6.23 1 11  
22 634-644 674-684  
1.88E8 + c EI Full ms  
[50.00-500.00]

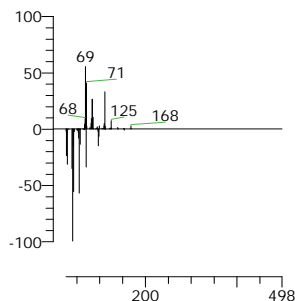

5-Ethyl-1-nonene  
Formula C<sub>11</sub>H<sub>22</sub>, MW 154, CAS# 19780-74-6, Entry# 34087

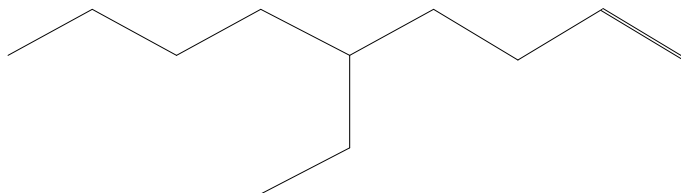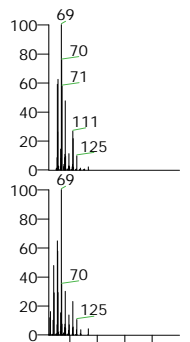

NL: 9.99E2  
13659 6.23 1 11 22  
634-644 674-684  
1.88E8 + c EI Full ms  
[50.00-500.00]

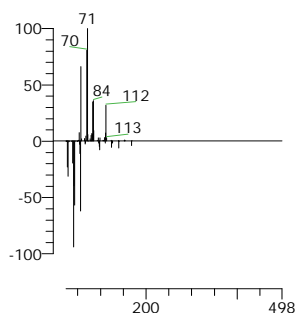

Cyclopentane, 1-butyl-2-propyl-  
Formula C<sub>12</sub>H<sub>24</sub>, MW 168, CAS# 62199-50-2, Entry# 32071  
1-Butyl-2-propylcyclopentane #

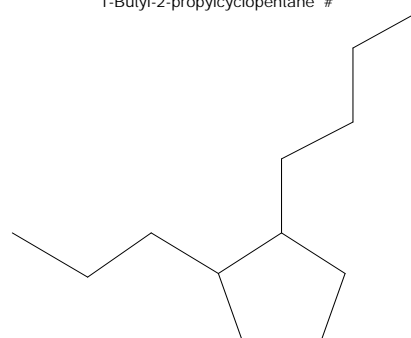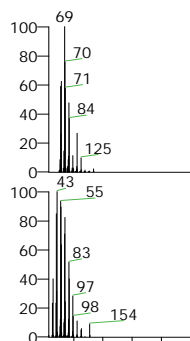

NL: 9.99E2  
13659 6.23 1 11  
22 634-644 674-684  
1.88E8 + c EI Full ms  
[50.00-500.00]

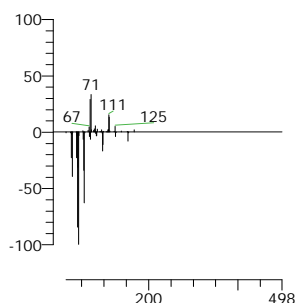

1-Undecene  
Formula C<sub>11</sub>H<sub>22</sub>, MW 154, CAS# 821-95-4, Entry# 6823  
n-1-Undecene

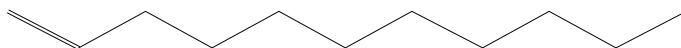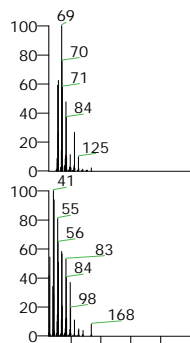

NL: 9.99E2  
13659 6.23 1 11  
22 634-644 674-684  
1.88E8 + c EI Full ms  
[50.00-500.00]

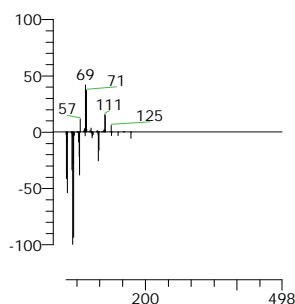

1-Dodecene  
Formula C<sub>12</sub>H<sub>24</sub>, MW 168, CAS# 112-41-4, Entry# 2237  
à-Dodecene

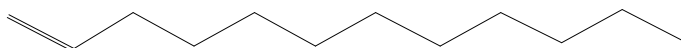

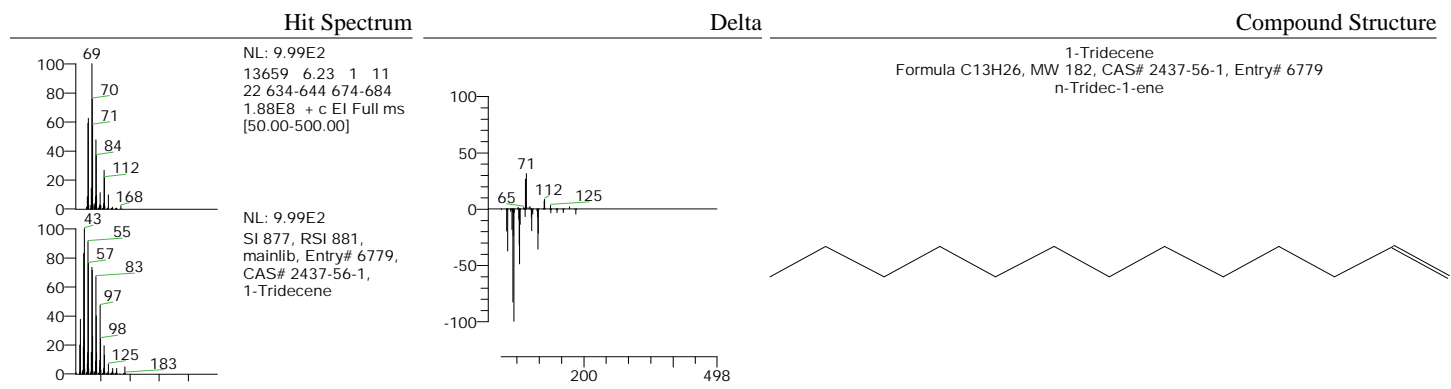

| RT   | Compound Name                   | Area       | Area % | RSI | Cas #      | Library |
|------|---------------------------------|------------|--------|-----|------------|---------|
| 6.23 | 5-Ethyl-1-nonene                | 3584675481 | 2.38   | 898 | 19780-74-6 | mainlib |
| 6.23 | 1-Undecene                      | 3584675481 | 2.38   | 893 | 821-95-4   | mainlib |
| 6.23 | Cyclopentane, 1-butyl-2-propyl- | 3584675481 | 2.38   | 893 | 62199-50-2 | mainlib |

## Hit Spectrum

## Delta

## Compound Structure

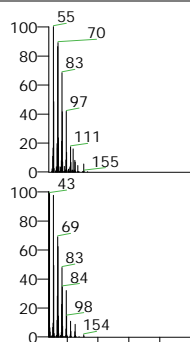

NL: 9.99E2  
13691 6.34 1 11  
22 666-676 706-716  
1.44E8 + c EI Full ms  
[50.00-500.00]

NL: 9.99E2  
SI 914, RSI 967,  
mainlib, Entry# 2200,  
CAS# NA,  
E-11,13-Tetradecadien-  
1-ol

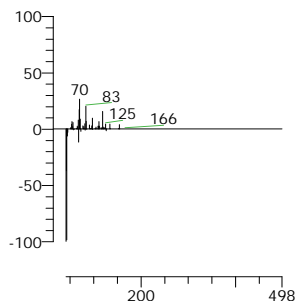

E-11,13-Tetradecadien-1-ol  
Formula C<sub>14</sub>H<sub>26</sub>O, MW 210, CAS# NA, Entry# 2200  
(11E)-11,13-Tetradecadien-1-ol #

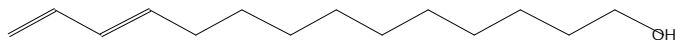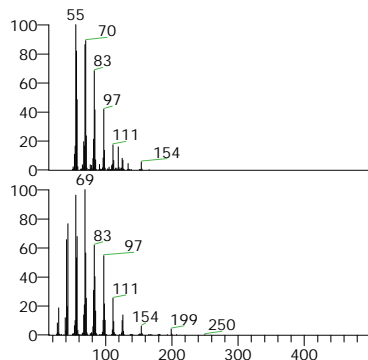

NL: 9.99E2  
13691 6.34 1 11  
22 666-676 706-716  
1.44E8 + c EI Full ms  
[50.00-500.00]

NL: 9.99E2  
SI 906, RSI 951,  
mainlib, Entry# 2508,  
CAS# 41446-67-7,  
3-Tetradecene, (Z)-

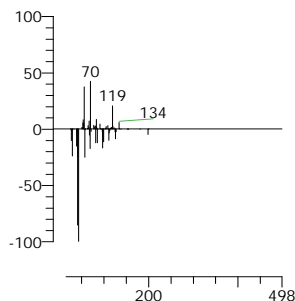

Acetic acid, trifluoro-, undecyl ester  
Formula C<sub>13</sub>H<sub>23</sub>F<sub>3</sub>O<sub>2</sub>, MW 268, CAS# 53800-01-4, Entry# 32052

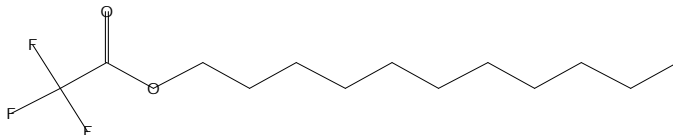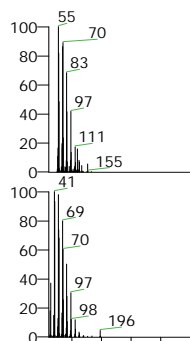

NL: 9.99E2  
13691 6.34 1 11  
22 666-676 706-716  
1.44E8 + c EI Full ms  
[50.00-500.00]

NL: 9.99E2  
SI 907, RSI 950,  
mainlib, Entry# 18425,  
CAS# 35507-09-6,  
7-Hexadecene, (Z)-

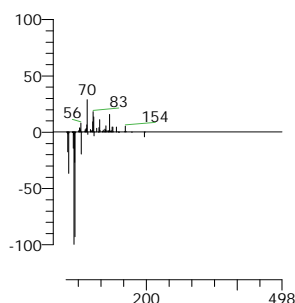

3-Tetradecene, (Z)-  
Formula C<sub>14</sub>H<sub>28</sub>, MW 196, CAS# 41446-67-7, Entry# 2508  
(3Z)-3-Tetradecene

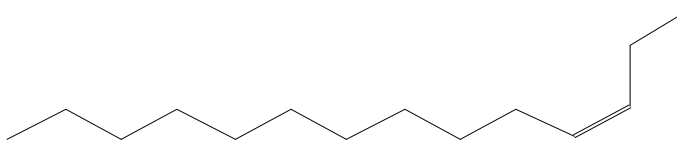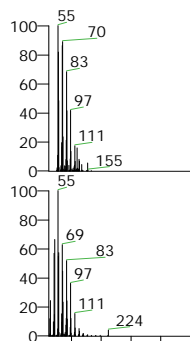

NL: 9.99E2  
SI 907, RSI 950,  
mainlib, Entry# 18425,  
CAS# 35507-09-6,  
7-Hexadecene, (Z)-

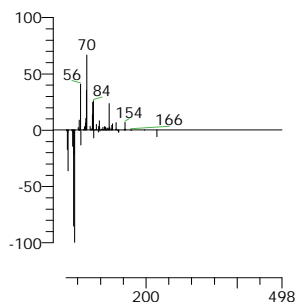

7-Hexadecene, (Z)-  
Formula C<sub>16</sub>H<sub>32</sub>, MW 224, CAS# 35507-09-6, Entry# 18425  
(7Z)-7-Hexadecene

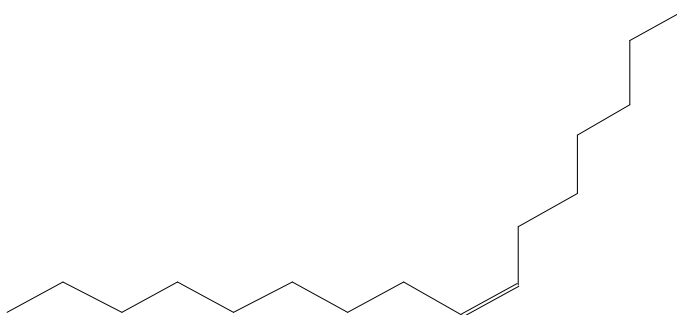



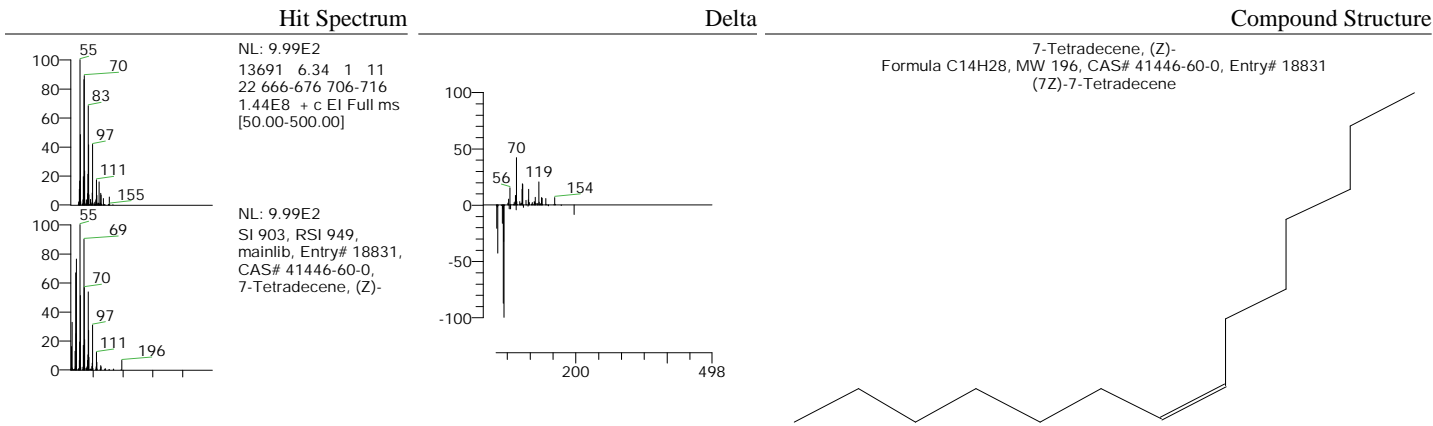

| RT   | Compound Name                          | Area       | Area % | RSI | Cas #      | Library |
|------|----------------------------------------|------------|--------|-----|------------|---------|
| 6.34 | E-11,13-Tetradecadien-1-ol             | 4194071753 | 2.78   | 967 | NA         | mainlib |
| 6.34 | Acetic acid, trifluoro-, undecyl ester | 4194071753 | 2.78   | 952 | 53800-01-4 | mainlib |
| 6.34 | 3-Tetradecene, (Z)-                    | 4194071753 | 2.78   | 951 | 41446-67-7 | mainlib |

## Hit Spectrum

## Delta

## Compound Structure

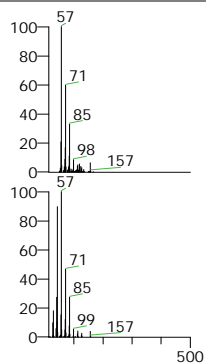

NL: 9.98E2  
13719 6.44 1 11  
22 694-704 734-744  
2.54E8 + c EI Full ms  
[50.00-500.00]

NL: 9.99E2  
SI 866, RSI 972,  
mainlib, Entry# 22688,  
CAS# 1120-21-4,  
Undecane

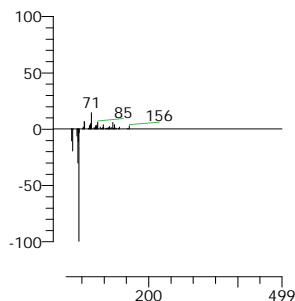

Undecane  
Formula C<sub>11</sub>H<sub>24</sub>, MW 156, CAS# 1120-21-4, Entry# 22688  
n-Undecane

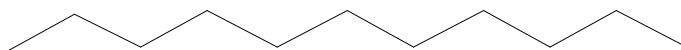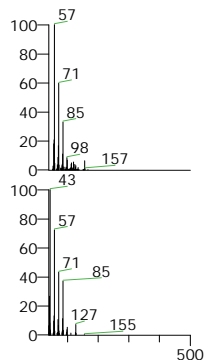

NL: 9.98E2  
13719 6.44 1 11  
22 694-704 734-744  
2.54E8 + c EI Full ms  
[50.00-500.00]

NL: 9.99E2  
SI 757, RSI 956,  
mainlib, Entry# 7452,  
CAS# 62108-27-4,  
Decane, 2,4,6-trimethyl-

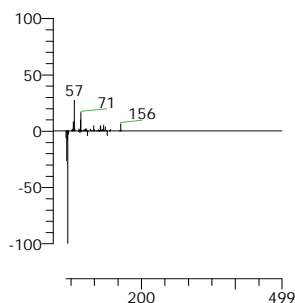

Decane, 2,4,6-trimethyl-  
Formula C<sub>13</sub>H<sub>28</sub>, MW 184, CAS# 62108-27-4, Entry# 7452  
2,4,6-Trimethyldecane #

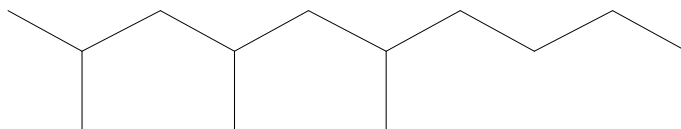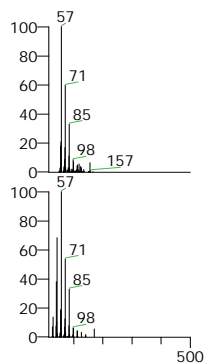

NL: 9.98E2  
13719 6.44 1 11  
22 694-704 734-744  
2.54E8 + c EI Full ms  
[50.00-500.00]

NL: 9.99E2  
SI 839, RSI 954,  
mainlib, Entry# 22550,  
CAS# 112-40-3,  
Dodecane

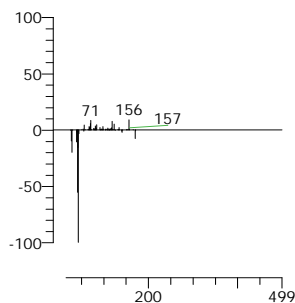

Dodecane  
Formula C<sub>12</sub>H<sub>26</sub>, MW 170, CAS# 112-40-3, Entry# 22550  
n-Dodecane

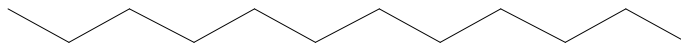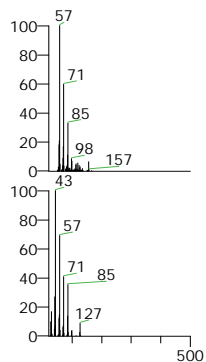

NL: 9.98E2  
13719 6.44 1 11  
22 694-704 734-744  
2.54E8 + c EI Full ms  
[50.00-500.00]

NL: 9.99E2  
SI 748, RSI 944,  
mainlib, Entry# 7436,  
CAS# 17312-83-3,  
Undecane,  
5,7-dimethyl-

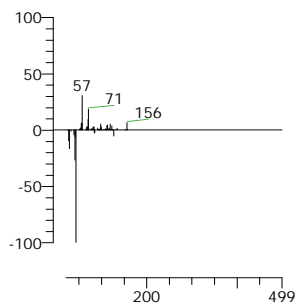

Undecane, 5,7-dimethyl-  
Formula C<sub>13</sub>H<sub>28</sub>, MW 184, CAS# 17312-83-3, Entry# 7436  
5,7-Dimethylundecane #

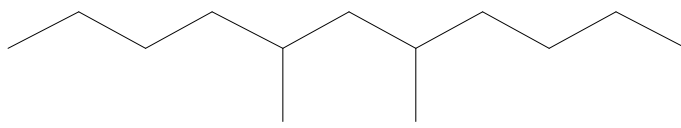

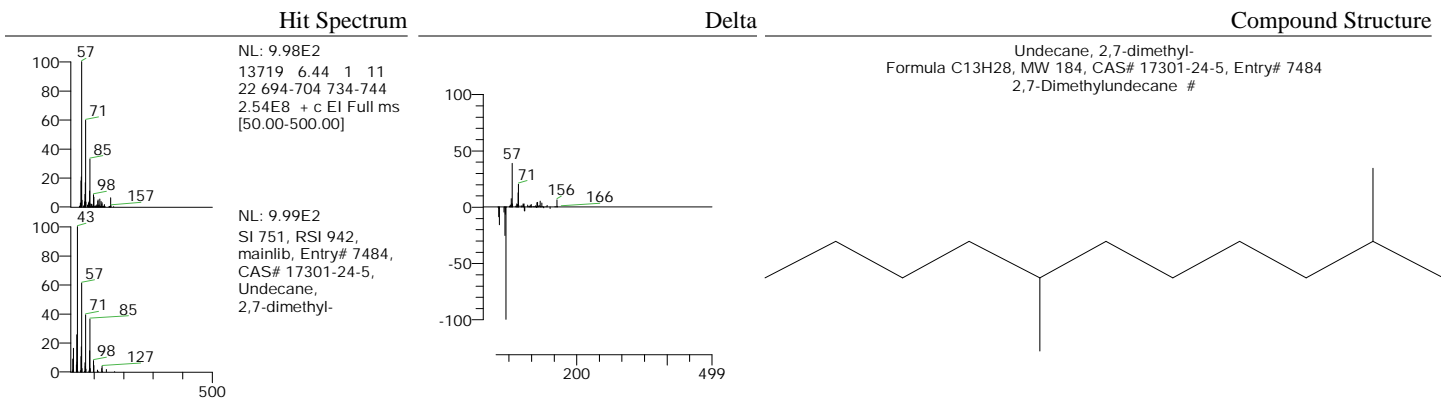

| RT   | Compound Name            | Area       | Area % | RSI | Cas #      | Library |
|------|--------------------------|------------|--------|-----|------------|---------|
| 6.44 | Undecane                 | 3962683466 | 2.63   | 972 | 1120-21-4  | mainlib |
| 6.44 | Decane, 2,4,6-trimethyl- | 3962683466 | 2.63   | 956 | 62108-27-4 | mainlib |
| 6.44 | Dodecane                 | 3962683466 | 2.63   | 954 | 112-40-3   | mainlib |

## Hit Spectrum

## Delta

## Compound Structure

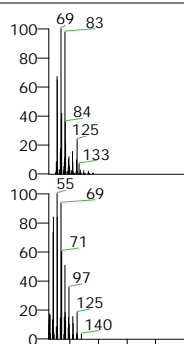

NL: 9.99E2  
13841 6.86 1 11 22  
816-826 856-866  
8.91E7 + c EI Full ms  
[50.00-500.00]

NL: 9.99E2  
SI 863, RSI 924,  
mainlib, Entry# 18829,  
CAS# 6750-34-1,  
1-Dodecanol,  
3,7,11-trimethyl-

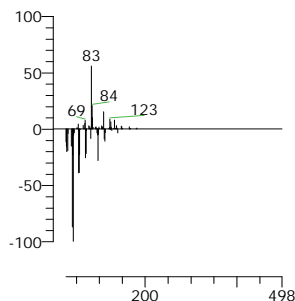

1-Dodecanol, 3,7,11-trimethyl-  
Formula C15H32O, MW 228, CAS# 6750-34-1, Entry# 18829  
Hexa-hydro-farnesol

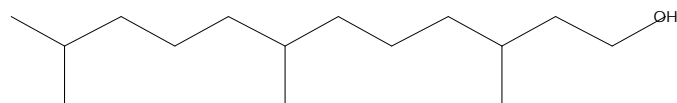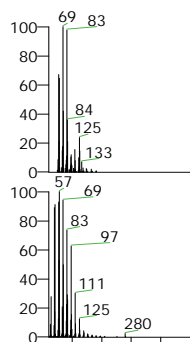

NL: 9.99E2  
13841 6.86 1 11  
22 816-826 856-866  
8.91E7 + c EI Full ms  
[50.00-500.00]

NL: 9.99E2  
SI 871, RSI 894,  
mainlib, Entry# 23390,  
CAS# 74685-33-9,  
3-Eicosene, (E)-

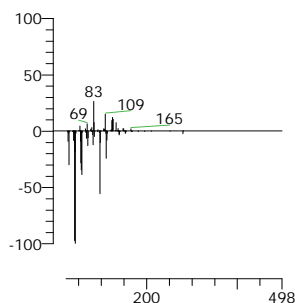

3-Eicosene, (E)-  
Formula C20H40, MW 280, CAS# 74685-33-9, Entry# 23390  
(3E)-3-Icosene #

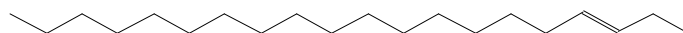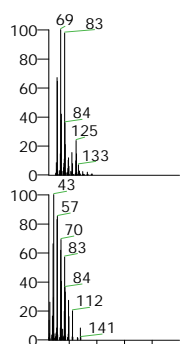

NL: 9.99E2  
13841 6.86 1 11 22  
816-826 856-866  
8.91E7 + c EI Full ms  
[50.00-500.00]

NL: 9.99E2  
SI 763, RSI 894, mainlib,  
Entry# 7338, CAS#  
83005-00-9,  
Dichloroacetic acid,  
decyl ester

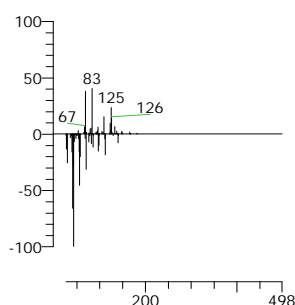

Dichloroacetic acid, decyl ester  
Formula C12H22Cl2O2, MW 268, CAS# 83005-00-9, Entry# 7338  
Decyl dichloroacetate #

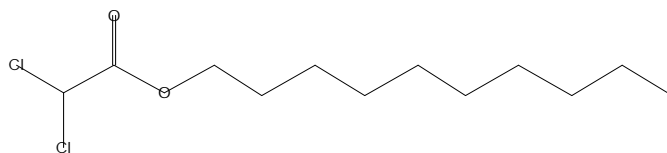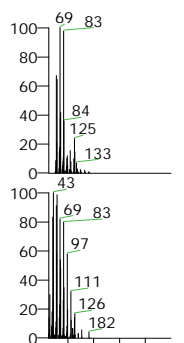

NL: 9.99E2  
13841 6.86 1 11 22  
816-826 856-866 8.91E7  
+ c EI Full ms  
[50.00-500.00]

NL: 9.99E2  
SI 848, RSI 892, mainlib,  
Entry# 7357, CAS#  
74339-51-8,  
Trichloroacetic acid,  
tridecyl ester

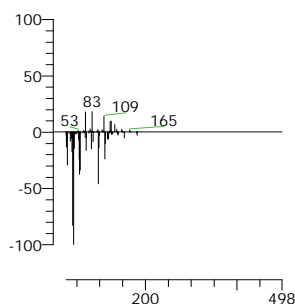

Trichloroacetic acid, tridecyl ester  
Formula C15H27Cl3O2, MW 344, CAS# 74339-51-8, Entry# 7357  
Tridecyl trichloroacetate #

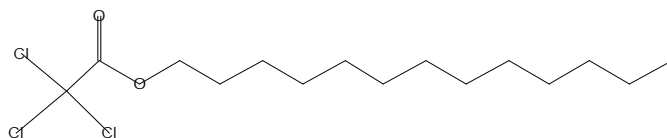

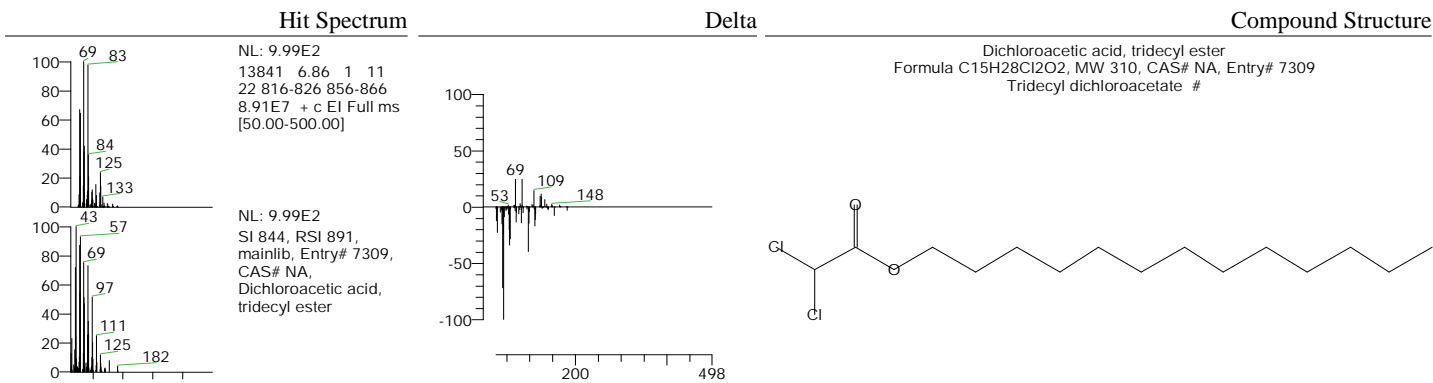

| RT   | Compound Name                    | Area       | Area % | RSI | Cas #      | Library |
|------|----------------------------------|------------|--------|-----|------------|---------|
| 6.86 | 1-Dodecanol, 3,7,11-trimethyl-   | 2803781304 | 1.86   | 924 | 6750-34-1  | mainlib |
| 6.86 | Dichloroacetic acid, decyl ester | 2803781304 | 1.86   | 894 | 83005-00-9 | mainlib |
| 6.86 | 3-Eicosene, (E)-                 | 2803781304 | 1.86   | 894 | 74685-33-9 | mainlib |

Analysed By:

Checked By:

## Hit Spectrum

## Delta

## Compound Structure

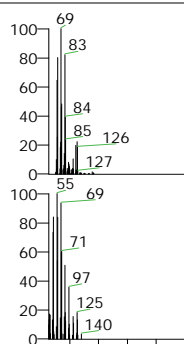

NL: 9.99E2  
13868 6.95 1 11 22  
843-853 883-893  
4.09E7 + c EI Full ms  
[50.00-500.00]

NL: 9.99E2  
SI 858, RSI 940,  
mainlib, Entry# 18829,  
CAS# 6750-34-1,  
1-Dodecanol,  
3,7,11-trimethyl-

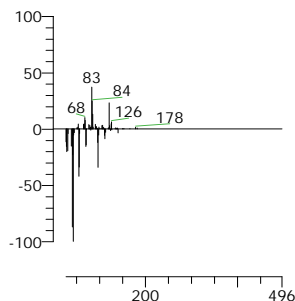

1-Dodecanol, 3,7,11-trimethyl-  
Formula C<sub>15</sub>H<sub>32</sub>O, MW 228, CAS# 6750-34-1, Entry# 18829  
Hexa-hydro-farnesol

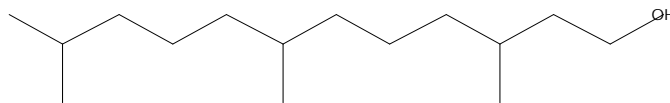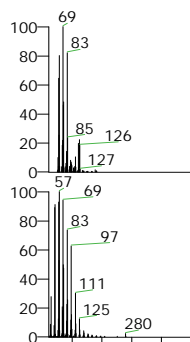

NL: 9.99E2  
13868 6.95 1 11  
22 843-853 883-893  
4.09E7 + c EI Full ms  
[50.00-500.00]

NL: 9.99E2  
SI 865, RSI 901,  
mainlib, Entry# 23390,  
CAS# 74685-33-9,  
3-Eicosene, (E)-

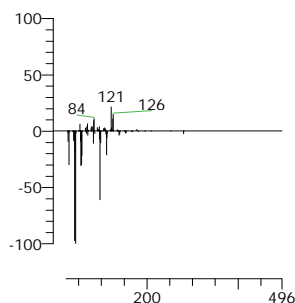

3-Eicosene, (E)-  
Formula C<sub>20</sub>H<sub>40</sub>, MW 280, CAS# 74685-33-9, Entry# 23390  
(3E)-3-Icosene #

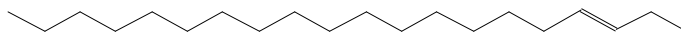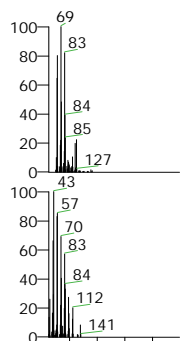

NL: 9.99E2  
13868 6.95 1 11 22  
843-853 883-893  
4.09E7 + c EI Full ms  
[50.00-500.00]

NL: 9.99E2  
SI 774, RSI 900, mainlib,  
Entry# 7338, CAS#  
83005-00-9,  
Dichloroacetic acid,  
decyl ester

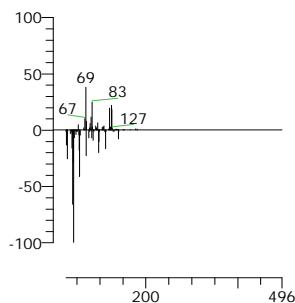

Dichloroacetic acid, decyl ester  
Formula C<sub>12</sub>H<sub>22</sub>Cl<sub>2</sub>O<sub>2</sub>, MW 268, CAS# 83005-00-9, Entry# 7338  
Decyl dichloroacetate #

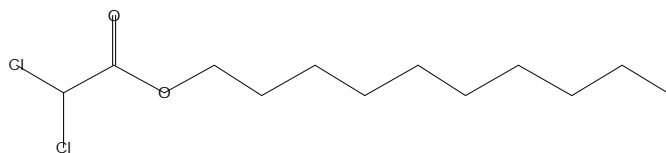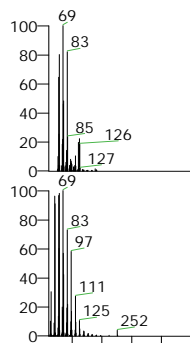

NL: 9.99E2  
13868 6.95 1 11  
22 843-853 883-893  
4.09E7 + c EI Full ms  
[50.00-500.00]

NL: 9.99E2  
SI 856, RSI 899,  
mainlib, Entry# 32223,  
CAS# 7206-19-1,  
3-Octadecene, (E)-

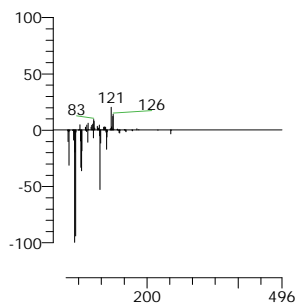

3-Octadecene, (E)-  
Formula C<sub>18</sub>H<sub>36</sub>, MW 252, CAS# 7206-19-1, Entry# 32223  
(3E)-3-Octadecene

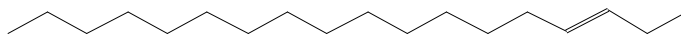

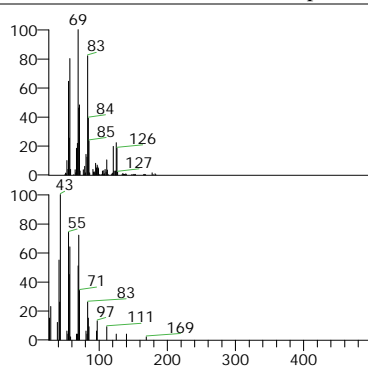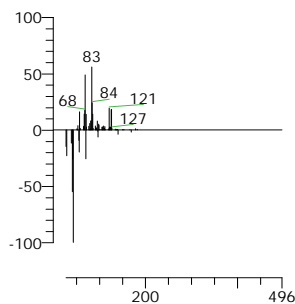

Acetic acid, trifluoro-, 3,7-dimethyloctyl ester  
Formula C<sub>12</sub>H<sub>21</sub>F<sub>3</sub>O<sub>2</sub>, MW 254, CAS# 28745-07-5, Entry# 6926  
Trifluoroacetyl-3,7-dimethyloctanol

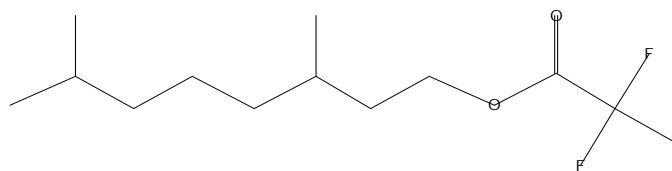

| RT   | Compound Name                    | Area       | Area % | RSI | Cas #      | Library |
|------|----------------------------------|------------|--------|-----|------------|---------|
| 6.95 | 1-Dodecanol, 3,7,11-trimethyl-   | 1095699316 | 0.73   | 940 | 6750-34-1  | mainlib |
| 6.95 | 3-Eicosene, (E)-                 | 1095699316 | 0.73   | 901 | 74685-33-9 | mainlib |
| 6.95 | Dichloroacetic acid, decyl ester | 1095699316 | 0.73   | 900 | 83005-00-9 | mainlib |

## Hit Spectrum

## Delta

## Compound Structure

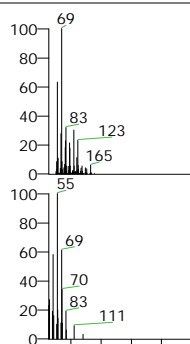

NL: 9.99E2  
13958 7.25 1 11  
22 933-943 973-983  
1.26E8 + c EI Full ms  
[50.00-500.00]

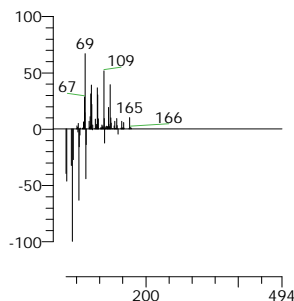

4-Nonene, 3-methyl-, (Z)-  
Formula C<sub>10</sub>H<sub>20</sub>, MW 140, CAS# 63830-69-3, Entry# 18798  
(4Z)-3-Methyl-4-nonene #

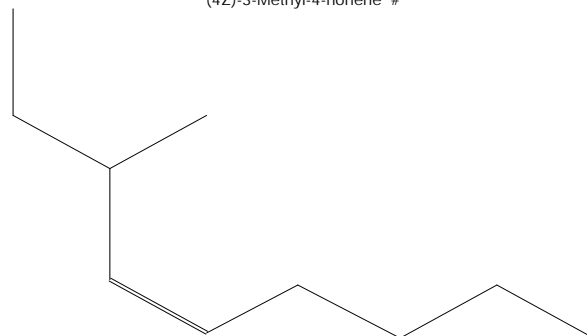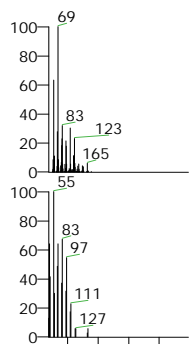

NL: 9.99E2  
13958 7.25 1 11  
22 933-943 973-983  
1.26E8 + c EI Full ms  
[50.00-500.00]

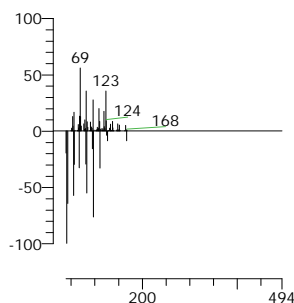

1-Hexyl-2-nitrocyclohexane  
Formula C<sub>12</sub>H<sub>23</sub>NO<sub>2</sub>, MW 213, CAS# 118252-04-3, Entry# 19313

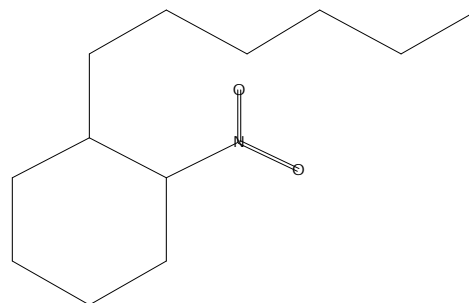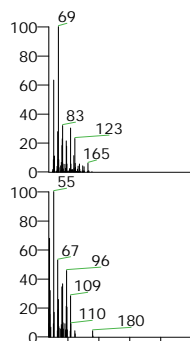

NL: 9.99E2  
13958 7.25 1 11  
22 933-943 973-983  
1.26E8 + c EI Full ms  
[50.00-500.00]

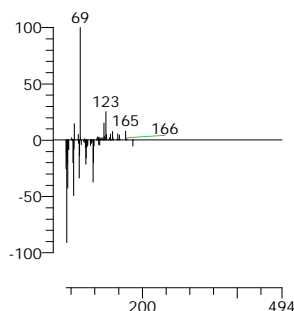

1-Cyclohexylheptene  
Formula C<sub>13</sub>H<sub>24</sub>, MW 180, CAS# 114614-83-4, Entry# 17941  
(1E)-1-Heptenylcyclohexane #

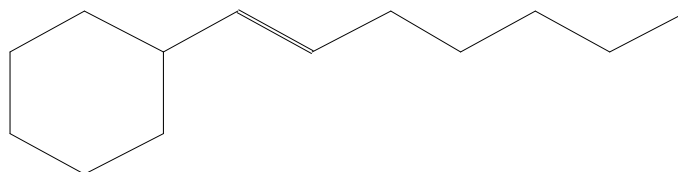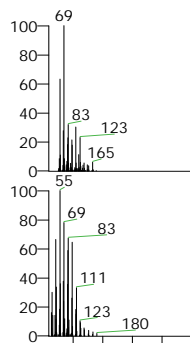

NL: 9.99E2  
13958 7.25 1 11  
22 933-943 973-983  
1.26E8 + c EI Full ms  
[50.00-500.00]

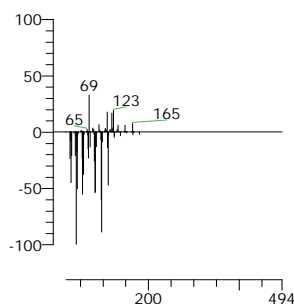

Cyclododecanemethanol  
Formula C<sub>13</sub>H<sub>26</sub>O, MW 198, CAS# 1892-12-2, Entry# 18944  
Cyclododecylmethanol #

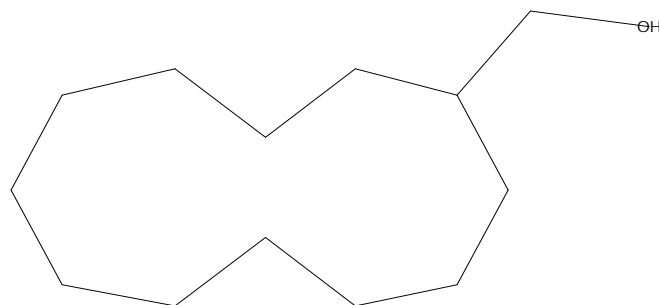



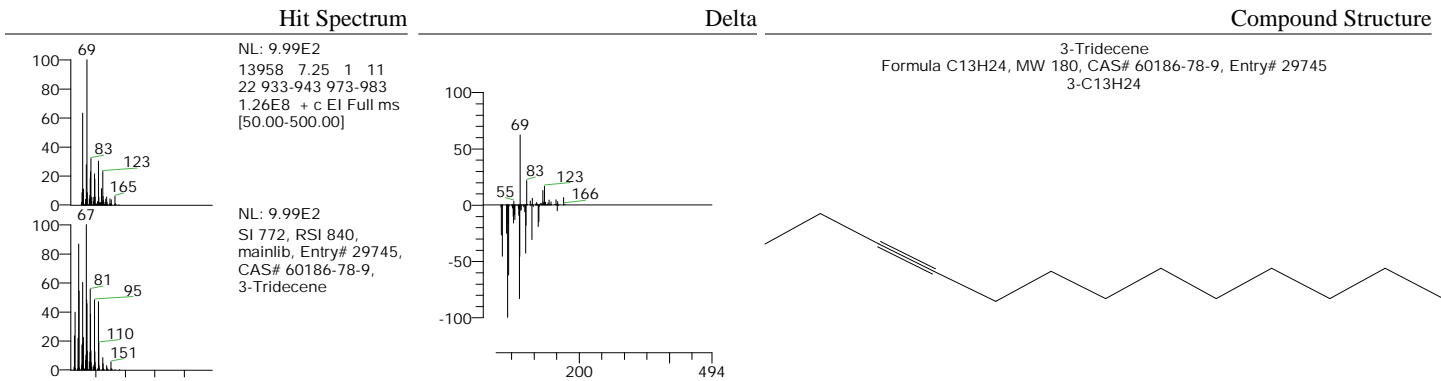

| RT   | Compound Name              | Area       | Area % | RSI | Cas #       | Library |
|------|----------------------------|------------|--------|-----|-------------|---------|
| 7.25 | 4-Nonene, 3-methyl-, (Z)-  | 3428099098 | 2.27   | 879 | 63830-69-3  | mainlib |
| 7.25 | 1-Hexyl-2-nitrocyclohexane | 3428099098 | 2.27   | 855 | 118252-04-3 | mainlib |
| 7.25 | 1-Cyclohexylheptene        | 3428099098 | 2.27   | 853 | 114614-83-4 | mainlib |

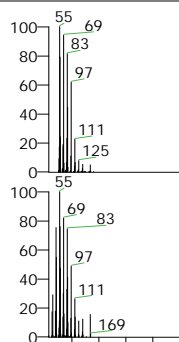

NL: 9.99E2  
131126 7.82 1 11  
22 1101-1111  
1141-1151 1.24E8 + c  
EI Full ms [50.00-500.00]

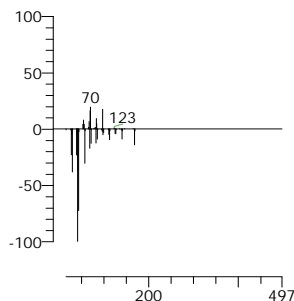

Cyclododecane  
Formula C<sub>12</sub>H<sub>24</sub>, MW 168, CAS# 294-62-2, Entry# 18863

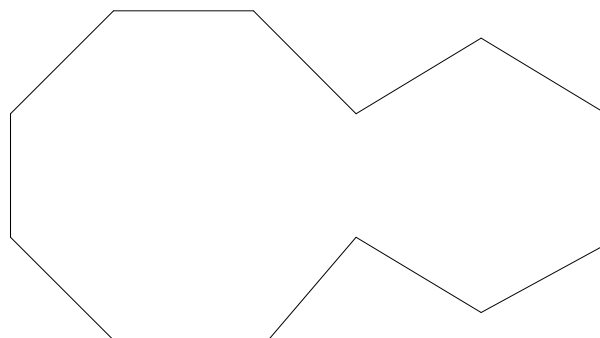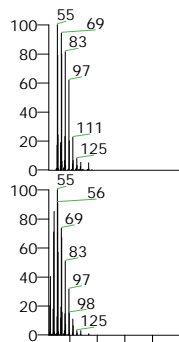

NL: 9.99E2  
131126 7.82 1 11  
22 1101-1111  
1141-1151 1.24E8 + c  
EI Full ms [50.00-500.00]

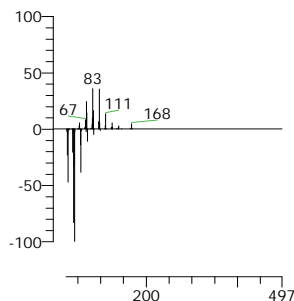

Cyclopropane, nonyl-  
Formula C<sub>12</sub>H<sub>24</sub>, MW 168, CAS# 74663-85-7, Entry# 18566  
Nonylcyclopropane #

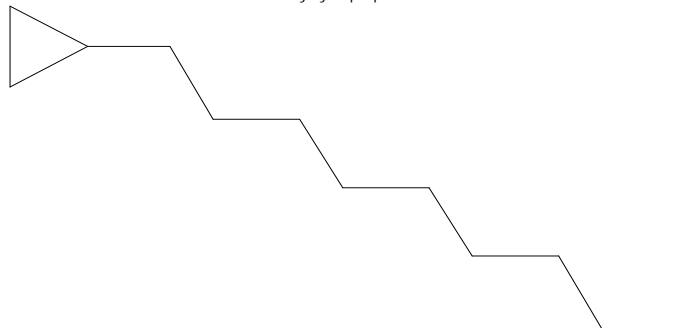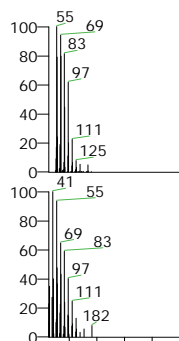

NL: 9.99E2  
131126 7.82 1 11  
22 1101-1111  
1141-1151 1.24E8 + c  
EI Full ms [50.00-500.00]

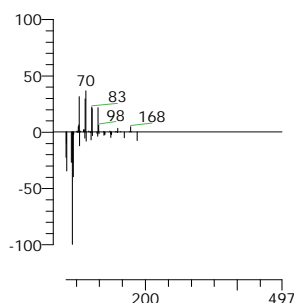

Cyclotridecane  
Formula C<sub>13</sub>H<sub>26</sub>, MW 182, CAS# 295-02-3, Entry# 2642

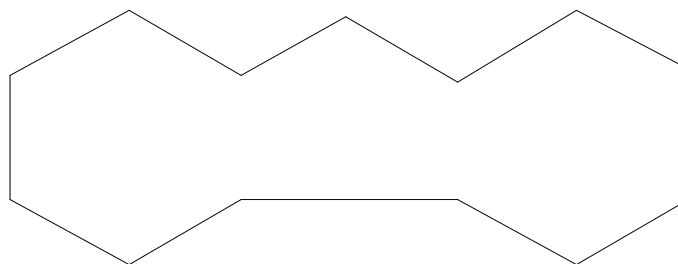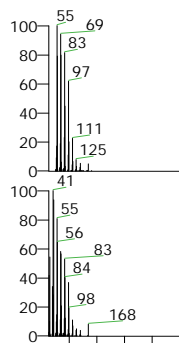

NL: 9.99E2  
131126 7.82 1 11  
22 1101-1111  
1141-1151 1.24E8 + c  
EI Full ms [50.00-500.00]

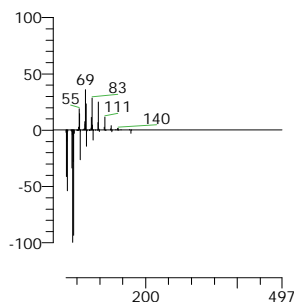

1-Dodecene  
Formula C<sub>12</sub>H<sub>24</sub>, MW 168, CAS# 112-41-4, Entry# 2237  
à-Dodecene

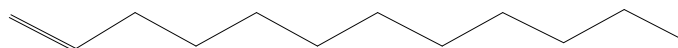

## Hit Spectrum

## Delta

## Compound Structure

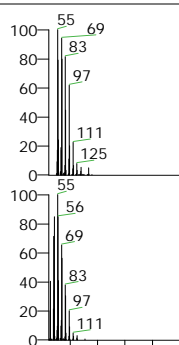

NL: 9.99E2  
131126 7.82 1 11  
22 1101-1111  
1141-1151 1.24E8 + c  
EI Full ms [50.00-500.00]

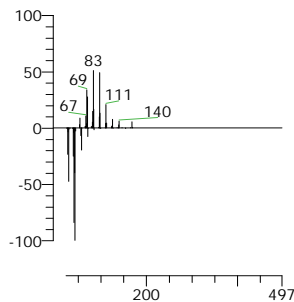

NL: 9.99E2  
SI 914, RSI 938, mainlib,  
Entry# 18565, CAS#  
1472-09-9,  
Cyclopropane, octyl-

Cyclopropane, octyl-  
Formula C<sub>11</sub>H<sub>22</sub>, MW 154, CAS# 1472-09-9, Entry# 18565  
Octane, 1-cyclopropyl-

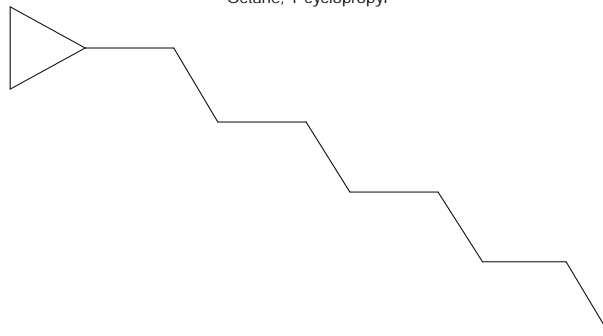

| RT   | Compound Name        | Area       | Area % | RSI | Cas #      | Library |
|------|----------------------|------------|--------|-----|------------|---------|
| 7.82 | Cyclododecane        | 4637415639 | 3.08   | 952 | 294-62-2   | mainlib |
| 7.82 | Cyclopropane, nonyl- | 4637415639 | 3.08   | 948 | 74663-85-7 | mainlib |
| 7.82 | Cyclotridecane       | 4637415639 | 3.08   | 944 | 295-02-3   | mainlib |

## Hit Spectrum

## Delta

## Compound Structure

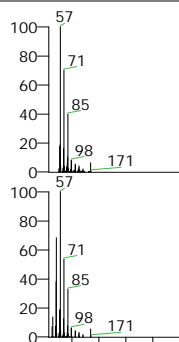

NL: 9.99E2  
131156 7.92 1 11  
22 1131-1141  
1171-1181 2.64E8 + c  
EI Full ms [50.00-500.00]

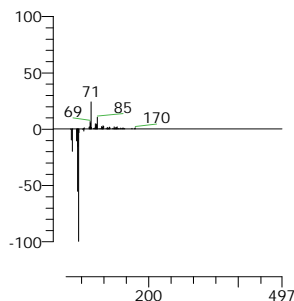

Dodecane  
Formula C<sub>12</sub>H<sub>26</sub>, MW 170, CAS# 112-40-3, Entry# 22550  
n-Dodecane

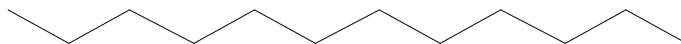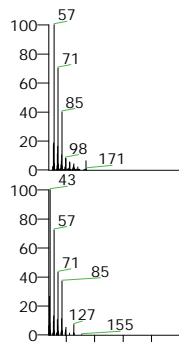

NL: 9.99E2  
131156 7.92 1 11  
22 1131-1141  
1171-1181 2.64E8 + c  
EI Full ms [50.00-500.00]

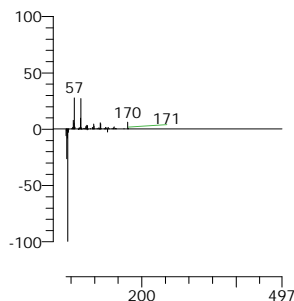

Decane, 2,4,6-trimethyl-  
Formula C<sub>13</sub>H<sub>28</sub>, MW 184, CAS# 62108-27-4, Entry# 7452  
2,4,6-Trimethyldecane #

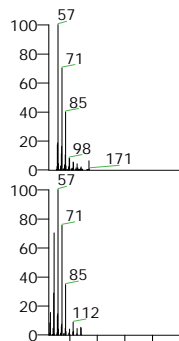

NL: 9.99E2  
131156 7.92 1 11  
22 1131-1141  
1171-1181 2.64E8 + c  
EI Full ms [50.00-500.00]

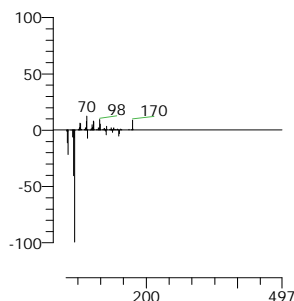

Nonane, 2-methyl-5-propyl-  
Formula C<sub>13</sub>H<sub>28</sub>, MW 184, CAS# 31081-17-1, Entry# 23616  
2-Methyl-5-propylnonane #

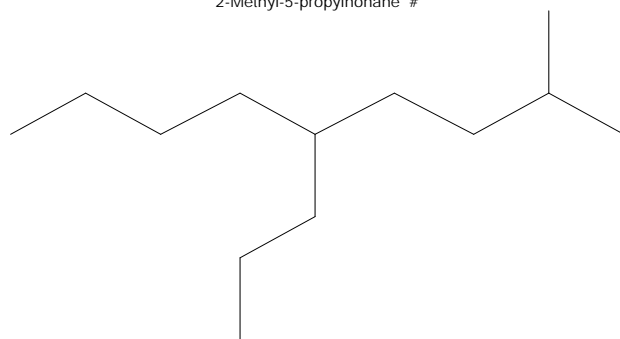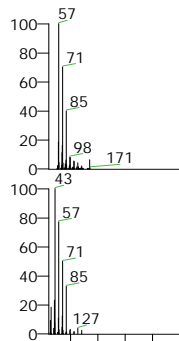

NL: 9.99E2  
131156 7.92 1 11  
22 1131-1141  
1171-1181 2.64E8 + c  
EI Full ms [50.00-500.00]

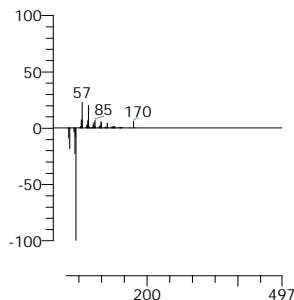

Undecane, 4,7-dimethyl-  
Formula C<sub>13</sub>H<sub>28</sub>, MW 184, CAS# 17301-32-5, Entry# 7443  
4,7-Dimethylundecane #

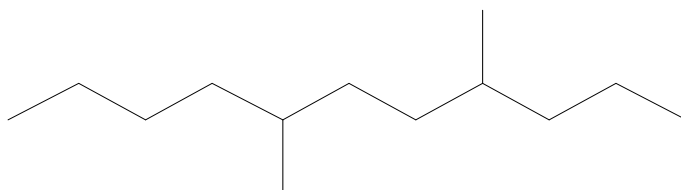

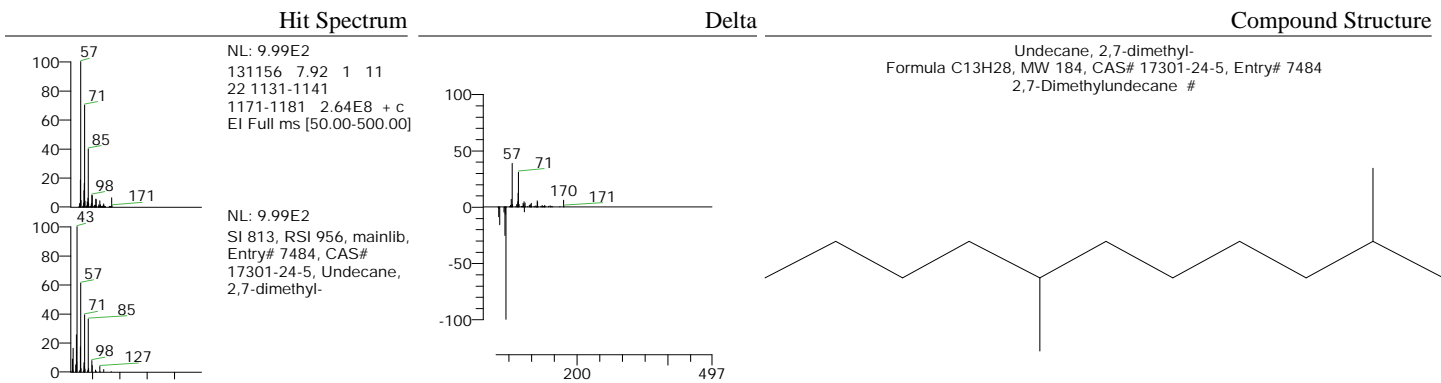

| RT   | Compound Name              | Area       | Area % | RSI | Cas #      | Library |
|------|----------------------------|------------|--------|-----|------------|---------|
| 7.92 | Dodecane                   | 4148834202 | 2.75   | 984 | 112-40-3   | mainlib |
| 7.92 | Decane, 2,4,6-trimethyl-   | 4148834202 | 2.75   | 970 | 62108-27-4 | mainlib |
| 7.92 | Nonane, 2-methyl-5-propyl- | 4148834202 | 2.75   | 959 | 31081-17-1 | mainlib |

Analysed By:

Checked By:

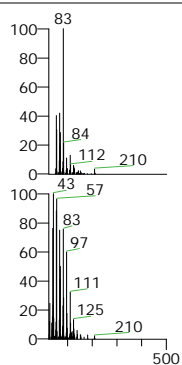

NL: 9.99E2  
131478 9.02 1 11 22  
1453-1463 1493-1503  
1.48E8 + c EI Full ms  
[50.00-500.00]

NL: 9.99E2  
SI 876, RSI 904, mainlib,  
Entry# 7360, CAS#  
74339-53-0,  
Trichloroacetic acid,  
pentadecyl ester

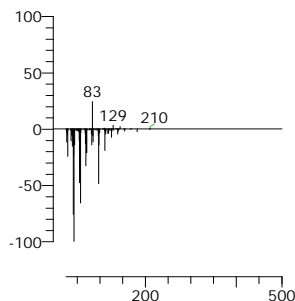

Trichloroacetic acid, pentadecyl ester  
Formula C17H31Cl3O2, MW 372, CAS# 74339-53-0, Entry# 7360  
Pentadecyl trichloroacetate #

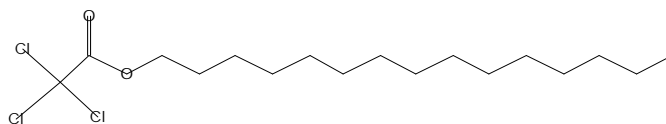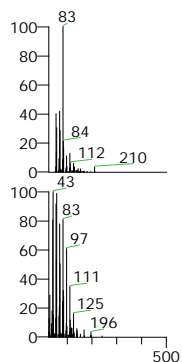

NL: 9.99E2  
131478 9.02 1 11 22  
1453-1463 1493-1503  
1.48E8 + c EI Full ms  
[50.00-500.00]

NL: 9.99E2  
SI 861, RSI 901, mainlib,  
Entry# 7359, CAS#  
74339-52-9,  
Trichloroacetic acid,  
tetradecyl ester

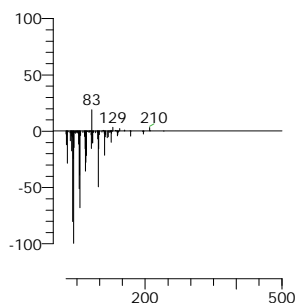

Trichloroacetic acid, tetradecyl ester  
Formula C16H29Cl3O2, MW 358, CAS# 74339-52-9, Entry# 7359  
Tetradecyl trichloroacetate #

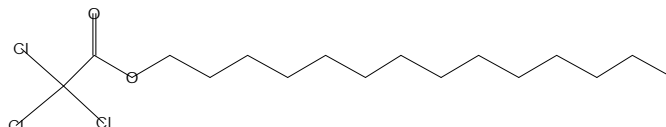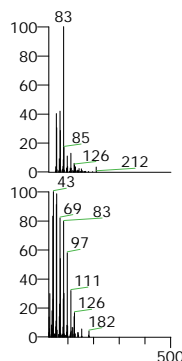

NL: 9.99E2  
131478 9.02 1 11 22  
1453-1463 1493-1503  
1.48E8 + c EI Full ms  
[50.00-500.00]

NL: 9.99E2  
SI 860, RSI 899, mainlib,  
Entry# 7357, CAS#  
74339-51-8,  
Trichloroacetic acid,  
tridecyl ester

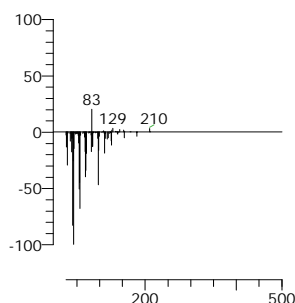

Trichloroacetic acid, tridecyl ester  
Formula C15H27Cl3O2, MW 344, CAS# 74339-51-8, Entry# 7357  
Tridecyl trichloroacetate #

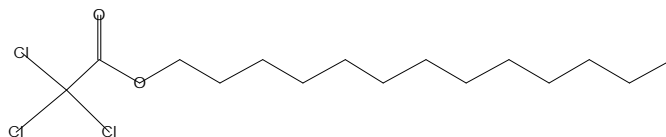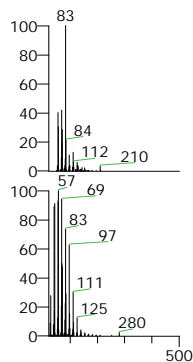

NL: 9.99E2  
131478 9.02 1 11  
22 1453-1463  
1493-1503 1.48E8 + c  
EI Full ms [50.00-500.00]

NL: 9.99E2  
SI 865, RSI 898, mainlib,  
Entry# 23390, CAS#  
74685-33-9, 3-Eicosene,  
(E)-

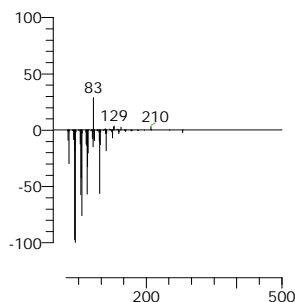

3-Eicosene, (E)-  
Formula C20H40, MW 280, CAS# 74685-33-9, Entry# 23390  
(3E)-3-Icosene #

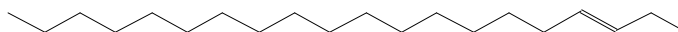

## Hit Spectrum

## Delta

## Compound Structure

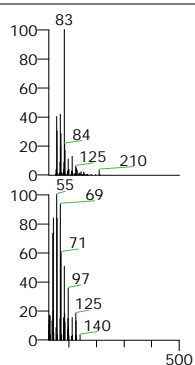

NL: 9.99E2  
 131478 9.02 1 11  
 22 1453-1463  
 1493-1503 1.48E8 + c  
 EI Full ms [50.00-500.00]

NL: 9.99E2  
 SI 831, RSI 897, mainlib,  
 Entry# 18829, CAS#  
 6750-34-1, 1-Dodecanol,  
 3,7,11-trimethyl-

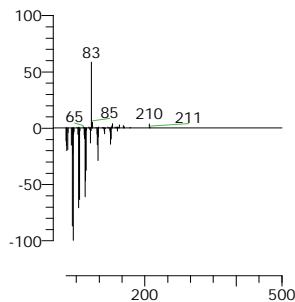

1-Dodecanol, 3,7,11-trimethyl-  
 Formula C<sub>15</sub>H<sub>32</sub>O, MW 228, CAS# 6750-34-1, Entry# 18829  
 Hexa-hydro-farnesol

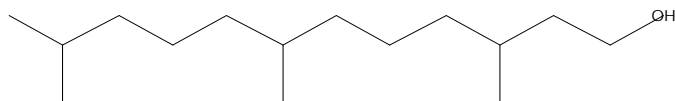

| RT   | Compound Name                          | Area       | Area % | RSI | Cas #      | Library |
|------|----------------------------------------|------------|--------|-----|------------|---------|
| 9.02 | Trichloroacetic acid, pentadecyl ester | 2563756349 | 1.70   | 904 | 74339-53-0 | mainlib |
| 9.02 | Trichloroacetic acid, tetradecyl ester | 2563756349 | 1.70   | 901 | 74339-52-9 | mainlib |
| 9.02 | Trichloroacetic acid, tridecyl ester   | 2563756349 | 1.70   | 899 | 74339-51-8 | mainlib |

Analysed By:

Checked By:

## Hit Spectrum

## Delta

## Compound Structure

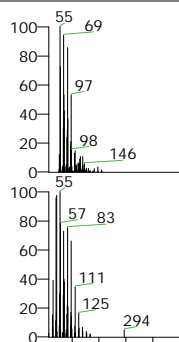

NL: 9.99E2  
131519 9.16 1 11  
22.1494-1504  
1534-1544 6.69E7 + c  
EI Full ms [50.00-500.00]

NL: 9.99E2  
SI 849, RSI 953, mainlib,  
Entry# 18363, CAS#  
95008-11-0,  
10-Heneicosene (c,t)

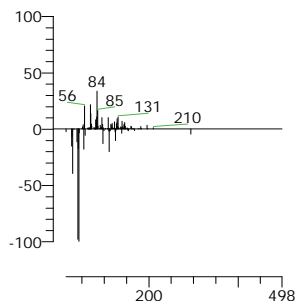

10-Heneicosene (c,t)  
Formula C<sub>21</sub>H<sub>42</sub>, MW 294, CAS# 95008-11-0, Entry# 18363  
(10E)-10-Henicosene #

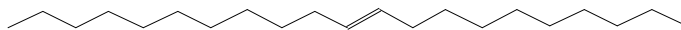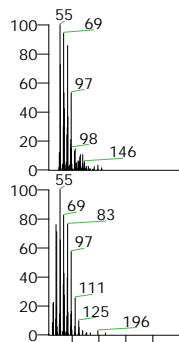

NL: 9.99E2  
131519 9.16 1 11  
22.1494-1504  
1534-1544 6.69E7 + c  
EI Full ms [50.00-500.00]

NL: 9.99E2  
SI 860, RSI 947, mainlib,  
Entry# 18939, CAS#  
36653-82-4,  
1-Hexadecanol

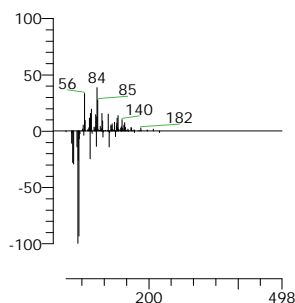

1-Hexadecanol  
Formula C<sub>16</sub>H<sub>34</sub>O, MW 242, CAS# 36653-82-4, Entry# 18939  
n-Cetyl alcohol

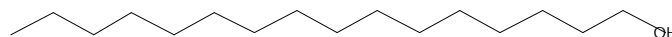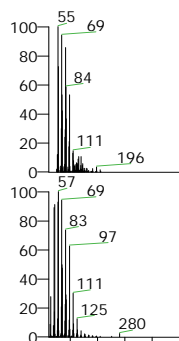

NL: 9.99E2  
131519 9.16 1 11  
22.1494-1504  
1534-1544 6.69E7 + c  
EI Full ms [50.00-500.00]

NL: 9.99E2  
SI 878, RSI 946, mainlib,  
Entry# 23390, CAS#  
74685-33-9, 3-Eicosene,  
(E)-

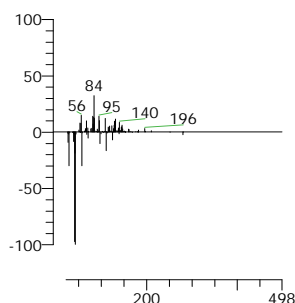

3-Eicosene, (E)-  
Formula C<sub>20</sub>H<sub>40</sub>, MW 280, CAS# 74685-33-9, Entry# 23390  
(3E)-3-Icosene #

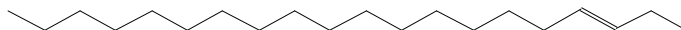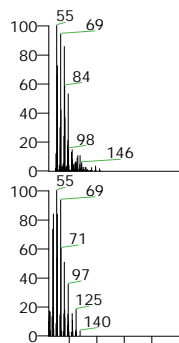

NL: 9.99E2  
131519 9.16 1 11  
22.1494-1504  
1534-1544 6.69E7 + c  
EI Full ms [50.00-500.00]

NL: 9.99E2  
SI 821, RSI 946, mainlib,  
Entry# 18829, CAS#  
6750-34-1, 1-Dodecanol,  
3,7,11-trimethyl-

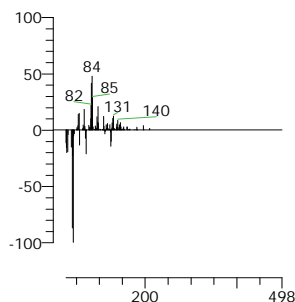

1-Dodecanol, 3,7,11-trimethyl-  
Formula C<sub>15</sub>H<sub>32</sub>O, MW 228, CAS# 6750-34-1, Entry# 18829  
Hexa-hydro-farnesol

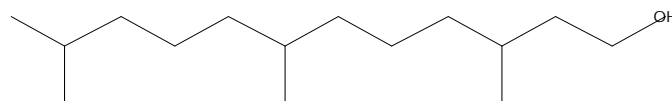



### Compound Structure

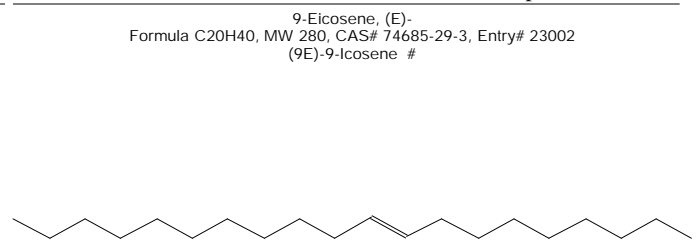

## Hit Spectrum

## Delta

## Compound Structure

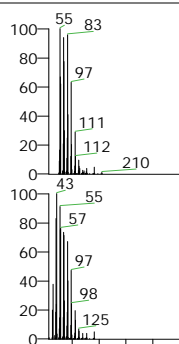

NL: 9.99E2  
131550 9.25 1 11  
22 1525-1535  
1565-1575 1.30E8 + c  
EI Full ms [50.00-500.00]

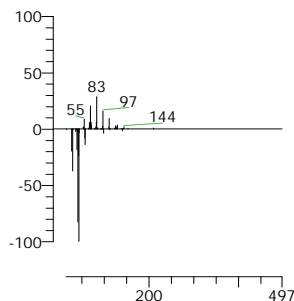

1-Tridecene  
Formula C<sub>13</sub>H<sub>26</sub>, MW 182, CAS# 2437-56-1, Entry# 6779  
n-Tridec-1-ene

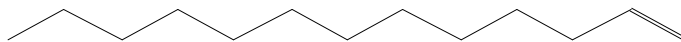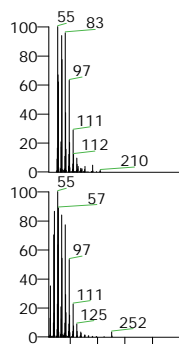

NL: 9.99E2  
131550 9.25 1 11  
22 1525-1535  
1565-1575 1.30E8 + c  
EI Full ms [50.00-500.00]

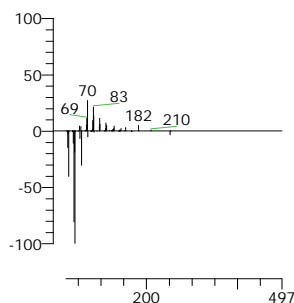

9-Octadecene, (E)-  
Formula C<sub>18</sub>H<sub>36</sub>, MW 252, CAS# 7206-25-9, Entry# 18644  
(9E)-9-Octadecene

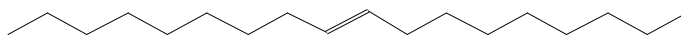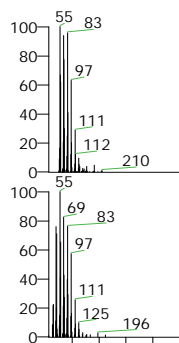

NL: 9.99E2  
131550 9.25 1 11  
22 1525-1535  
1565-1575 1.30E8 + c  
EI Full ms [50.00-500.00]

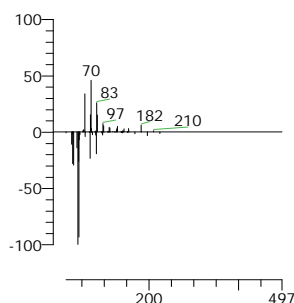

1-Hexadecanol  
Formula C<sub>16</sub>H<sub>34</sub>O, MW 242, CAS# 36653-82-4, Entry# 18939  
n-Cetyl alcohol

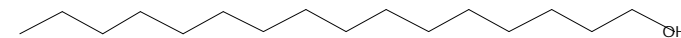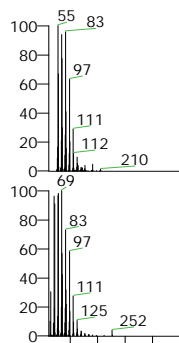

NL: 9.99E2  
131550 9.25 1 11  
22 1525-1535  
1565-1575 1.30E8 + c  
EI Full ms [50.00-500.00]

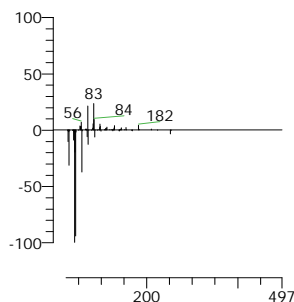

3-Octadecene, (E)-  
Formula C<sub>18</sub>H<sub>36</sub>, MW 252, CAS# 7206-19-1, Entry# 32223  
(3E)-3-Octadecene

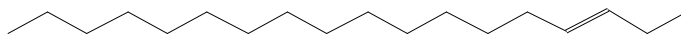

### Compound Structure

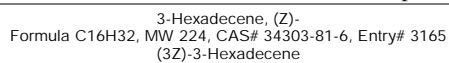

| RT   | Compound Name      | Area       | Area % | RSI | Cas #      | Library |
|------|--------------------|------------|--------|-----|------------|---------|
| 9.25 | 1-Tridecene        | 4024324226 | 2.67   | 974 | 2437-56-1  | mainlib |
| 9.25 | 1-Hexadecanol      | 4024324226 | 2.67   | 968 | 36653-82-4 | mainlib |
| 9.25 | 9-Octadecene, (E)- | 4024324226 | 2.67   | 968 | 7206-25-9  | mainlib |

## Hit Spectrum

## Delta

## Compound Structure

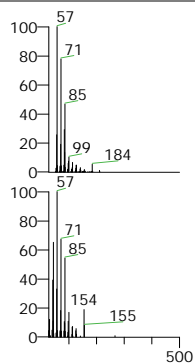

NL: 9.99E2  
131579 9.37 1 11  
22 1554-1564  
1594-1604 2.20E8 + c  
EI Full ms [50.00-500.00]

NL: 9.99E2  
SI 895, RSI 936, mainlib,  
Entry# 23599, CAS#  
56862-62-5,  
10-Methylnonadecane

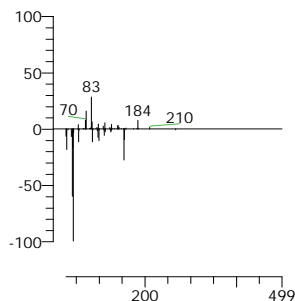

10-Methylnonadecane  
Formula C<sub>20</sub>H<sub>42</sub>, MW 282, CAS# 56862-62-5, Entry# 23599  
Nonadecane, 10-methyl

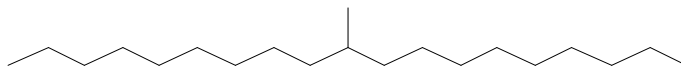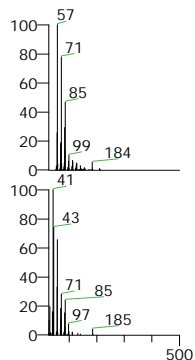

NL: 9.99E2  
131579 9.37 1 11  
22 1554-1564  
1594-1604 2.20E8 + c  
EI Full ms [50.00-500.00]

NL: 9.99E2  
SI 855, RSI 935, mainlib,  
Entry# 2293, CAS# NA,  
Oxalic acid, allyl decyl  
ester

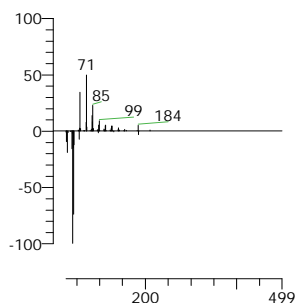

Oxalic acid, allyl decyl ester  
Formula C<sub>15</sub>H<sub>26</sub>O<sub>4</sub>, MW 270, CAS# NA, Entry# 2293

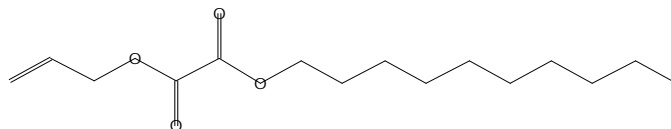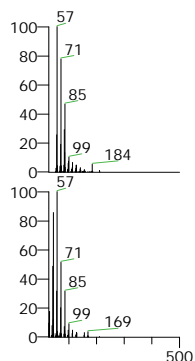

NL: 9.99E2  
131579 9.37 1 11  
22 1554-1564  
1594-1604 2.20E8 + c  
EI Full ms [50.00-500.00]

NL: 9.99E2  
SI 888, RSI 933, mainlib,  
Entry# 22546, CAS#  
73105-67-6,  
1-Iodo-2-methylundecane

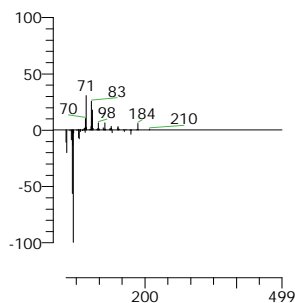

1-Iodo-2-methylundecane  
Formula C<sub>12</sub>H<sub>25</sub>I, MW 296, CAS# 73105-67-6, Entry# 22546

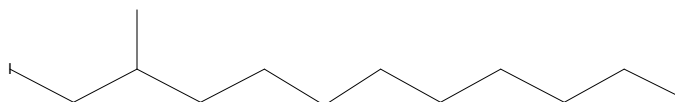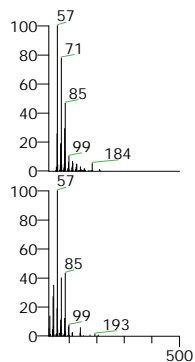

NL: 9.99E2  
131579 9.37 1 11  
22 1554-1564  
1594-1604 2.20E8 + c  
EI Full ms [50.00-500.00]

NL: 9.99E2  
SI 858, RSI 932, mainlib,  
Entry# 23989, CAS# NA,  
Sulfurous acid, butyl  
decyl ester

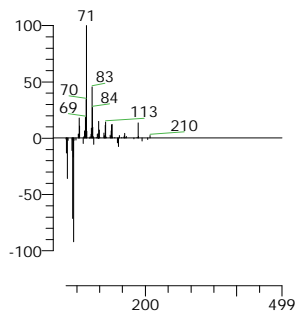

Sulfurous acid, butyl decyl ester  
Formula C<sub>14</sub>H<sub>30</sub>O<sub>3</sub>S, MW 278, CAS# NA, Entry# 23989

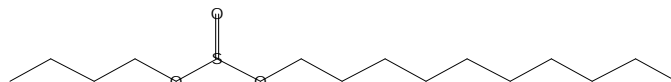

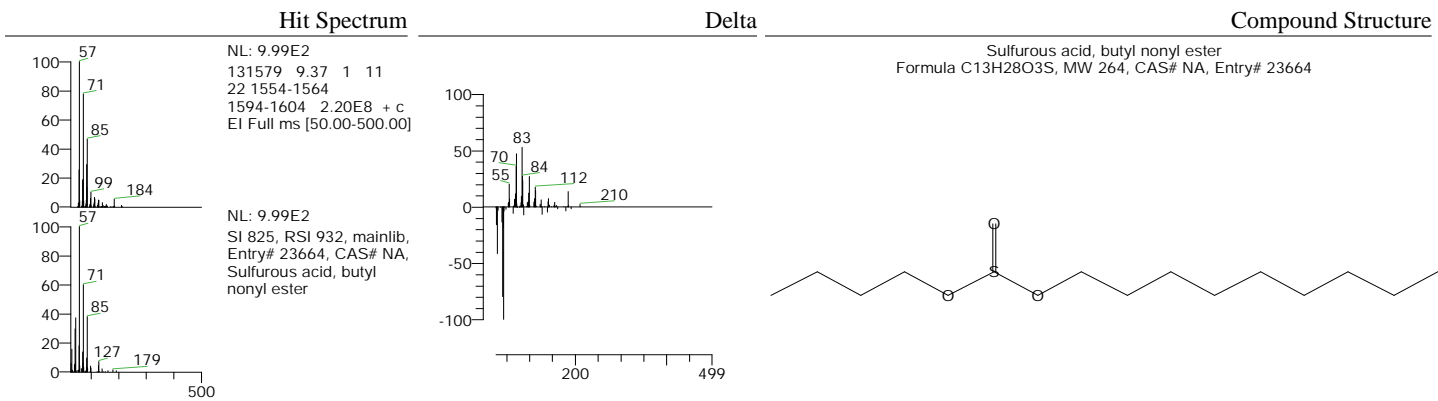

| RT   | Compound Name                  | Area       | Area % | RSI | Cas #      | Library |
|------|--------------------------------|------------|--------|-----|------------|---------|
| 9.37 | 10-Methylnonadecane            | 2800125743 | 1.86   | 936 | 56862-62-5 | mainlib |
| 9.37 | Oxalic acid, allyl decyl ester | 2800125743 | 1.86   | 935 | NA         | mainlib |
| 9.37 | 1-Iodo-2-methylundecane        | 2800125743 | 1.86   | 933 | 73105-67-6 | mainlib |

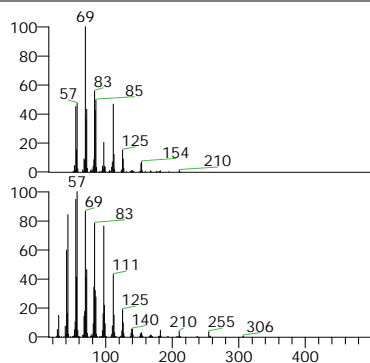

Trifluoroacetic acid, pentadecyl ester  
Formula C<sub>17</sub>H<sub>31</sub>F<sub>3</sub>O<sub>2</sub>, MW 324, CAS# 959010-23-2, Entry# 23039

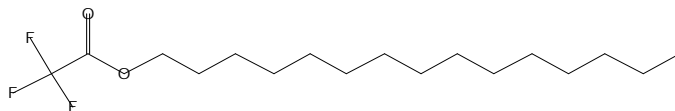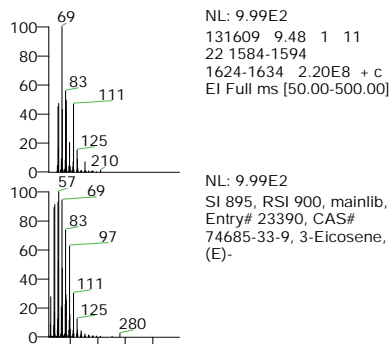

3-Eicosene, (E)-  
Formula C<sub>20</sub>H<sub>40</sub>, MW 280, CAS# 74685-33-9, Entry# 23390  
(3E)-3-Icosene #

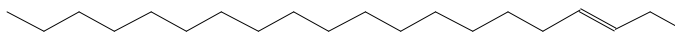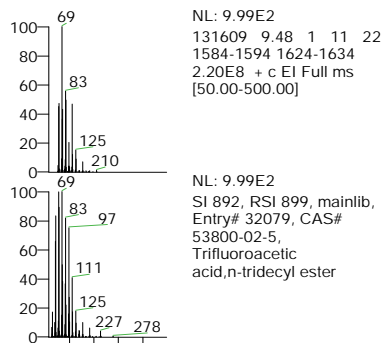

Trifluoroacetic acid, n-tridecyl ester  
Formula C<sub>15</sub>H<sub>27</sub>F<sub>3</sub>O<sub>2</sub>, MW 296, CAS# 53800-02-5, Entry# 32079  
Tridecyl trifluoroacetate #

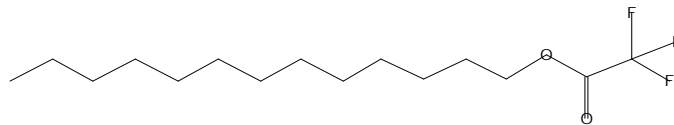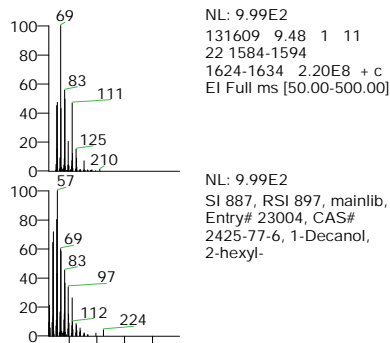

1-Decanol, 2-hexyl-  
Formula C<sub>16</sub>H<sub>34</sub>O, MW 242, CAS# 2425-77-6, Entry# 23004  
2-Hexyl-1-decanol

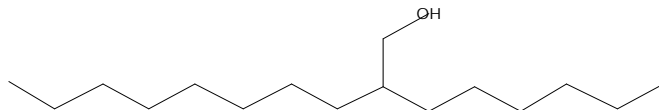

## Hit Spectrum

## Delta

## Compound Structure

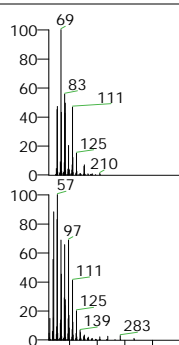

NL: 9.99E2  
131609 9.48 1 11  
22 1584-1594  
1624-1634 2.20E8 + c  
EI Full ms [50.00-500.00]

NL: 9.99E2  
SI 887, RSI 893, mainlib,  
Entry# 22444, CAS# NA,  
Heptadecyl  
trifluoroacetate

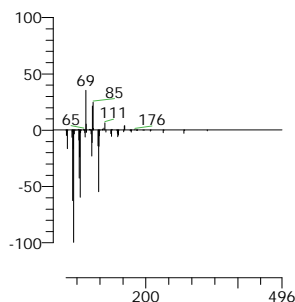

Heptadecyl trifluoroacetate  
Formula C19H35F3O2, MW 352, CAS# NA, Entry# 22444  
Heptadecyl 2,2-trifluoroacetate

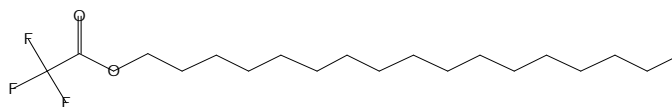

| RT   | Compound Name                          | Area       | Area % | RSI | Cas #       | Library |
|------|----------------------------------------|------------|--------|-----|-------------|---------|
| 9.48 | Trifluoroacetic acid, pentadecyl ester | 5996302173 | 3.98   | 902 | 959010-23-2 | mainlib |
| 9.48 | 3-Eicosene, (E)-                       | 5996302173 | 3.98   | 900 | 74685-33-9  | mainlib |
| 9.48 | Trifluoroacetic acid,n-tridecyl ester  | 5996302173 | 3.98   | 899 | 53800-02-5  | mainlib |

## Hit Spectrum

## Delta

## Compound Structure

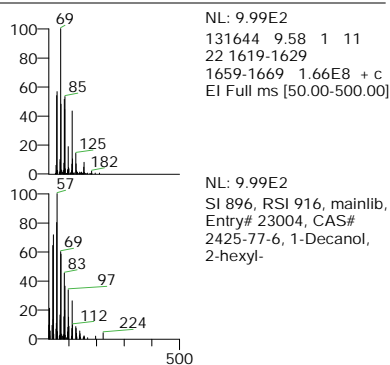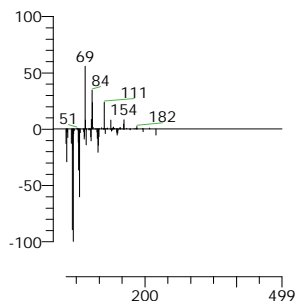

1-Decanol, 2-hexyl-  
Formula C16H34O, MW 242, CAS# 2425-77-6, Entry# 23004  
2-Hexyl-1-decanol

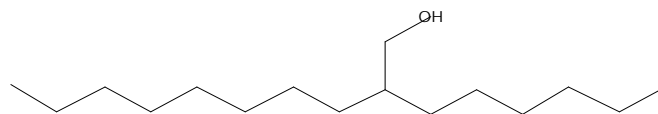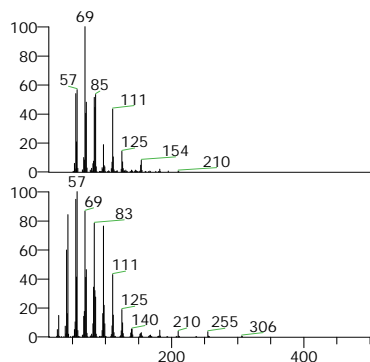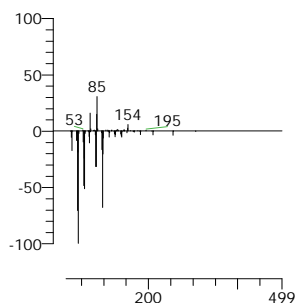

Trifluoroacetic acid, pentadecyl ester  
Formula C17H31F3O2, MW 324, CAS# 959010-23-2, Entry# 23039

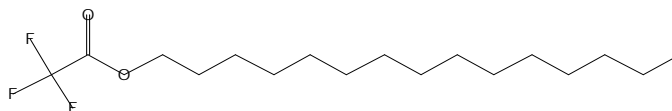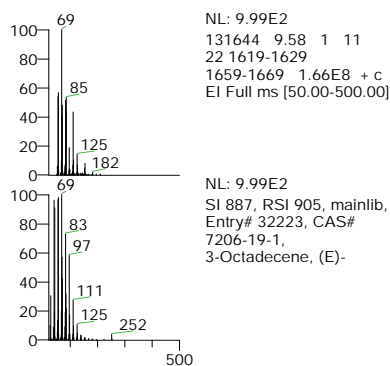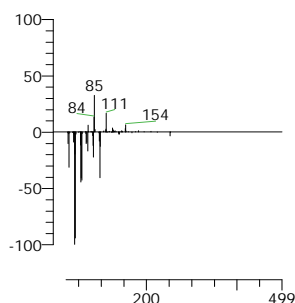

3-Octadecene, (E)-  
Formula C18H36, MW 252, CAS# 7206-19-1, Entry# 32223  
(3E)-3-Octadecene

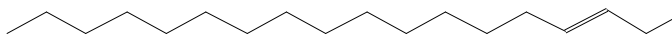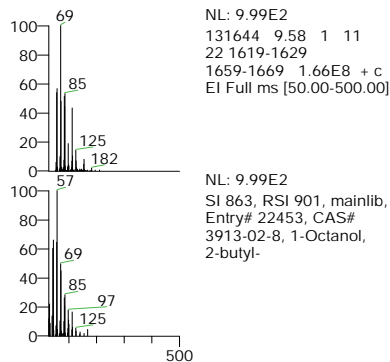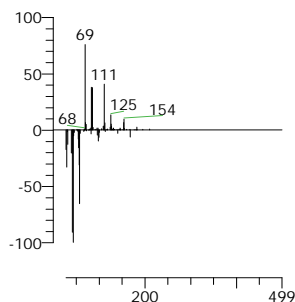

1-Octanol, 2-butyl-  
Formula C12H26O, MW 186, CAS# 3913-02-8, Entry# 22453  
2-Butyl-1-octanol

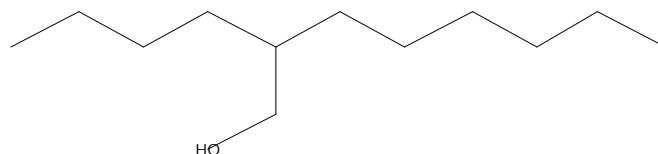



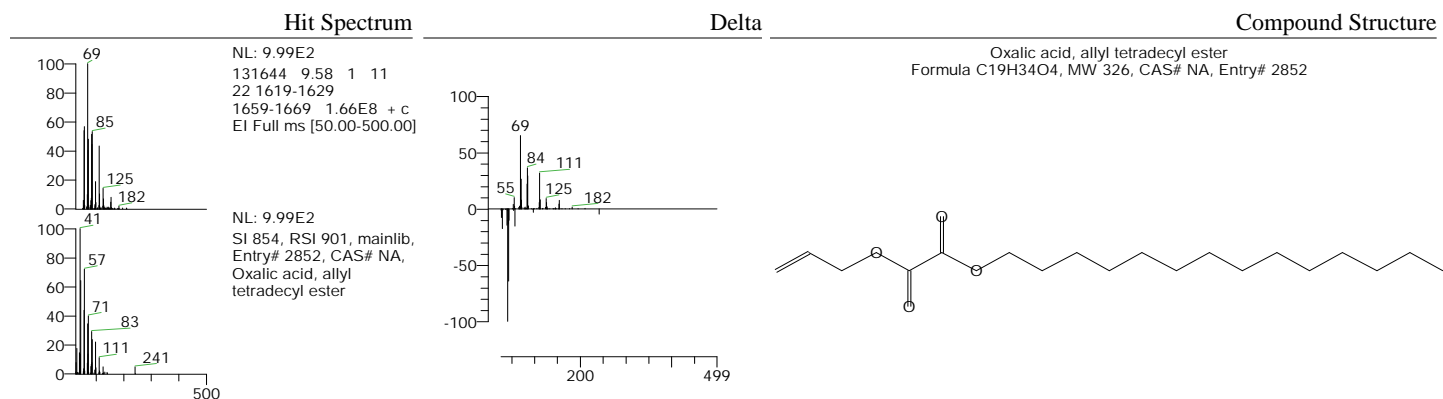

| RT   | Compound Name                          | Area       | Area % | RSI | Cas #       | Library |
|------|----------------------------------------|------------|--------|-----|-------------|---------|
| 9.58 | 1-Decanol, 2-hexyl-                    | 3420962043 | 2.27   | 916 | 2425-77-6   | mainlib |
| 9.58 | Trifluoroacetic acid, pentadecyl ester | 3420962043 | 2.27   | 908 | 959010-23-2 | mainlib |
| 9.58 | 3-Octadecene, (E)-                     | 3420962043 | 2.27   | 905 | 7206-19-1   | mainlib |

## Hit Spectrum

## Delta

## Compound Structure

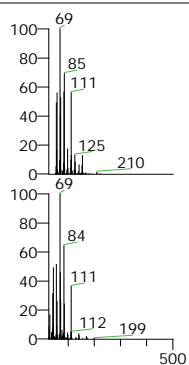

NL: 9.99E2  
131678 9.71 1 11 22  
1653-1663 1693-1703  
1.56E8 + c EI Full ms  
[50.00-500.00]

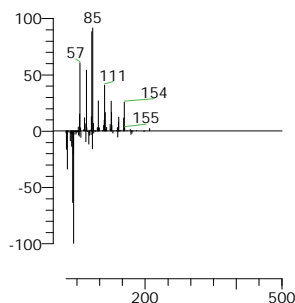

Dichloroacetic acid, 6-ethyl-3-octyl ester  
Formula C<sub>12</sub>H<sub>22</sub>Cl<sub>2</sub>O<sub>2</sub>, MW 268, CAS# NA, Entry# 32562  
1,4-Diethylhexyl dichloroacetate #

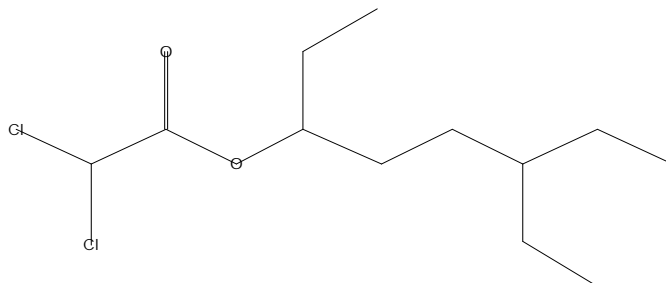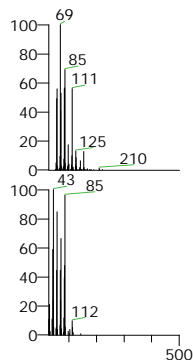

NL: 9.99E2  
131678 9.71 1 11  
22 1653-1663  
1693-1703 1.56E8 + c  
EI Full ms [50.00-500.00]

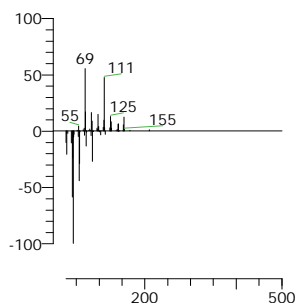

Hexyl octyl ether  
Formula C<sub>14</sub>H<sub>30</sub>O, MW 214, CAS# 17071-54-4, Entry# 9315  
1-(Hexyloxy)octane #

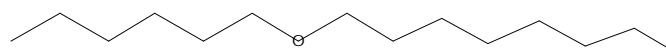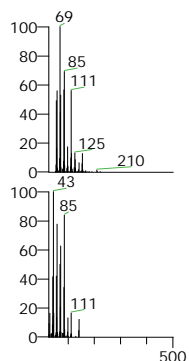

NL: 9.99E2  
131678 9.71 1 11 22  
1653-1663 1693-1703  
1.56E8 + c EI Full ms  
[50.00-500.00]

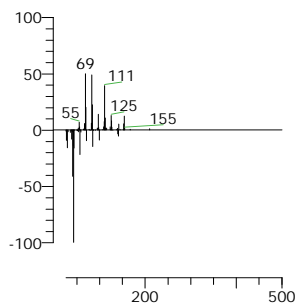

Oxalic acid, 6-ethyloct-3-yl isohexyl ester  
Formula C<sub>18</sub>H<sub>34</sub>O<sub>4</sub>, MW 314, CAS# NA, Entry# 9293

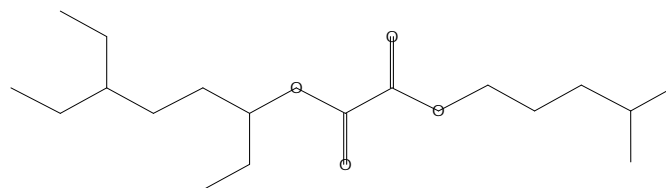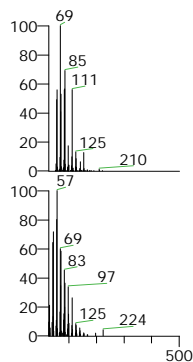

NL: 9.99E2  
131678 9.71 1 11  
22 1653-1663  
1693-1703 1.56E8 + c  
EI Full ms [50.00-500.00]

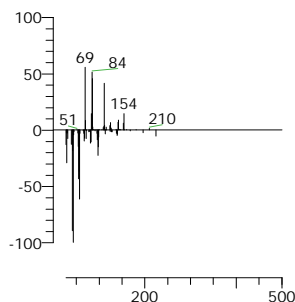

1-Decanol, 2-hexyl-  
Formula C<sub>16</sub>H<sub>34</sub>O, MW 242, CAS# 2425-77-6, Entry# 23004  
2-Hexyl-1-decanol

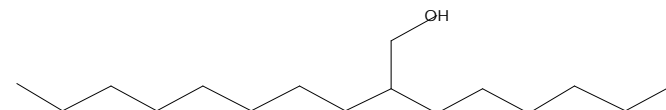

## Hit Spectrum

## Delta

## Compound Structure

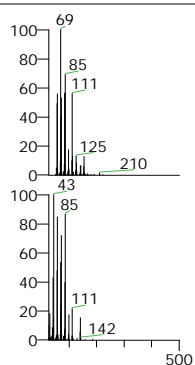

NL: 9.99E2  
131678 9.71 1 11  
22 1653-1663  
1693-1703 1.56E8 + c  
EI Full ms [50.00-500.00]

NL: 9.99E2  
SI 799, RSI 869, mainlib,  
Entry# 9294, CAS# NA,  
Oxalic acid,  
6-ethyloct-3-yl hexyl ester

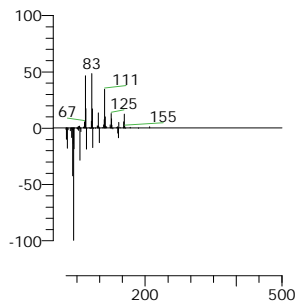

Oxalic acid, 6-ethyloct-3-yl hexyl ester  
Formula C18H34O4, MW 314, CAS# NA, Entry# 9294

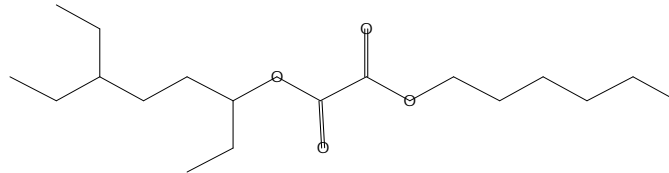

| RT   | Compound Name                               | Area       | Area % | RSI | Cas #      | Library |
|------|---------------------------------------------|------------|--------|-----|------------|---------|
| 9.71 | Dichloroacetic acid, 6-ethyl-3-octyl ester  | 5837778482 | 3.87   | 882 | NA         | mainlib |
| 9.71 | Hexyl octyl ether                           | 5837778482 | 3.87   | 878 | 17071-54-4 | mainlib |
| 9.71 | Oxalic acid, 6-ethyloct-3-yl isohexyl ester | 5837778482 | 3.87   | 873 | NA         | mainlib |

## Hit Spectrum

## Delta

## Compound Structure

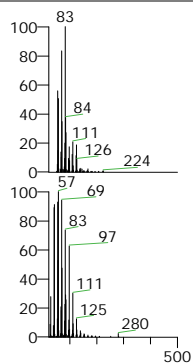

NL: 9.99E2  
131774 10.03 1 11  
22 1749-1759 1789-1799  
1.50E8 + c EI Full ms  
[50.00-500.00]

NL: 9.99E2  
SI 889, RSI 909, mainlib,  
Entry# 23390, CAS#  
74685-33-9, 3-Eicosene,  
(E)-

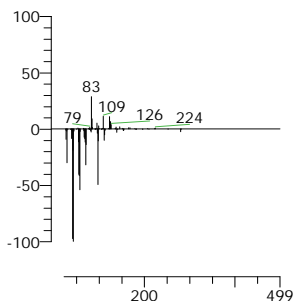

3-Eicosene, (E)-  
Formula C<sub>20</sub>H<sub>40</sub>, MW 280, CAS# 74685-33-9, Entry# 23390  
(3E)-3-icosene #

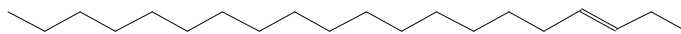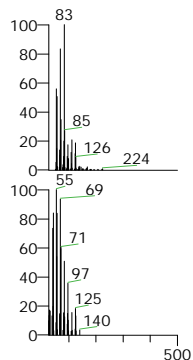

NL: 9.99E2  
131774 10.03 1 11  
22 1749-1759 1789-1799  
1.50E8 + c EI Full ms  
[50.00-500.00]

NL: 9.99E2  
SI 853, RSI 906, mainlib,  
Entry# 18829, CAS#  
6750-34-1, 1-Dodecanol,  
3,7,11-trimethyl-

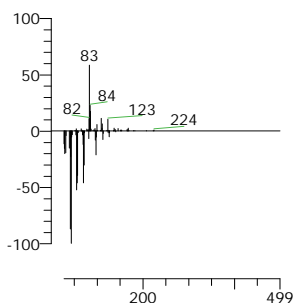

1-Dodecanol, 3,7,11-trimethyl-  
Formula C<sub>15</sub>H<sub>32</sub>O, MW 228, CAS# 6750-34-1, Entry# 18829  
Hexa-hydro-farnesol

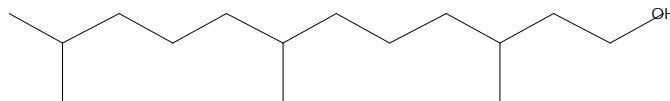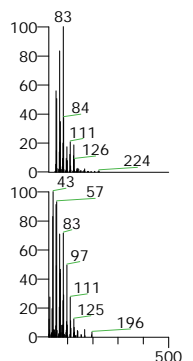

NL: 9.99E2  
131774 10.03 1 11  
22 1749-1759 1789-1799  
1.50E8 + c EI Full ms  
[50.00-500.00]

NL: 9.99E2  
SI 856, RSI 900, mainlib,  
Entry# 7343, CAS#  
83005-02-1,  
Dichloroacetic acid,  
tetradecyl ester

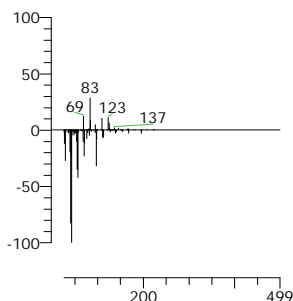

Dichloroacetic acid, tetradecyl ester  
Formula C<sub>16</sub>H<sub>30</sub>Cl<sub>2</sub>O<sub>2</sub>, MW 324, CAS# 83005-02-1, Entry# 7343  
Tetradecyl dichloroacetate #

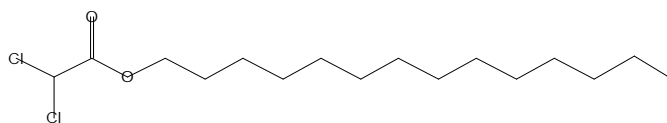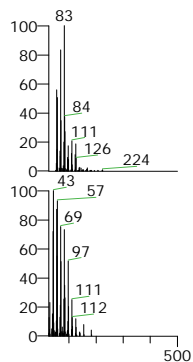

NL: 9.99E2  
131774 10.03 1 11  
22 1749-1759 1789-1799  
1.50E8 + c EI Full ms  
[50.00-500.00]

NL: 9.99E2  
SI 852, RSI 900, mainlib,  
Entry# 7309, CAS# NA,  
Dichloroacetic acid,  
tridecyl ester

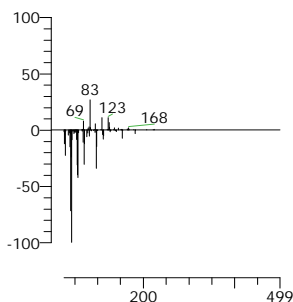

Dichloroacetic acid, tridecyl ester  
Formula C<sub>15</sub>H<sub>28</sub>Cl<sub>2</sub>O<sub>2</sub>, MW 310, CAS# NA, Entry# 7309  
Tridecyl dichloroacetate #

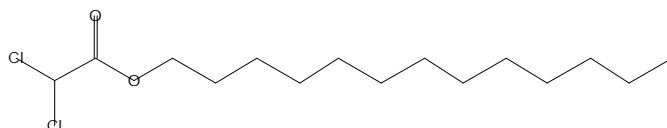

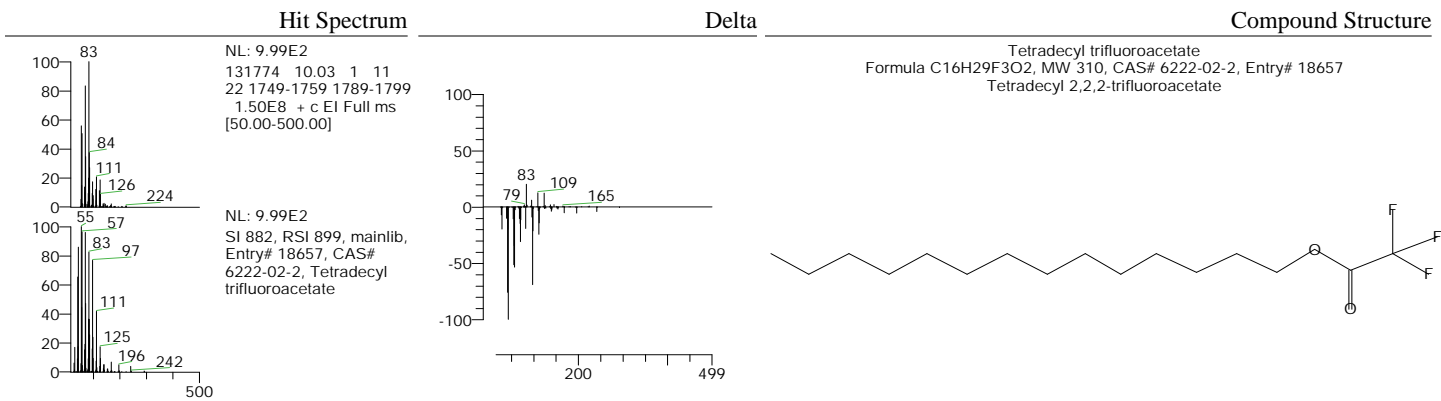

| RT    | Compound Name                         | Area       | Area % | RSI | Cas #      | Library |
|-------|---------------------------------------|------------|--------|-----|------------|---------|
| 10.03 | 3-Eicosene, (E)-                      | 3340221279 | 2.22   | 909 | 74685-33-9 | mainlib |
| 10.03 | 1-Dodecanol, 3,7,11-trimethyl-        | 3340221279 | 2.22   | 906 | 6750-34-1  | mainlib |
| 10.03 | Dichloroacetic acid, tetradecyl ester | 3340221279 | 2.22   | 900 | 83005-02-1 | mainlib |

## Hit Spectrum

## Delta

## Compound Structure

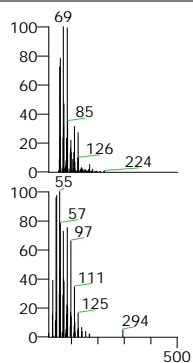

NL: 9.99E2  
131858 10.32 1 11  
22 1833-1843 1873-1883  
5.82E7 + c EI Full ms  
[50.00-500.00]

NL: 9.99E2  
SI 868, RSI 932, mainlib,  
Entry# 18363, CAS#  
95008-11-0,  
10-Heneicosene (c,t)

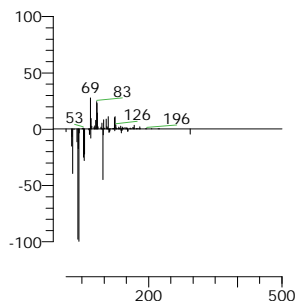

10-Heneicosene (c,t)  
Formula C<sub>21</sub>H<sub>42</sub>, MW 294, CAS# 95008-11-0, Entry# 18363  
(10E)-10-Henicosenes #

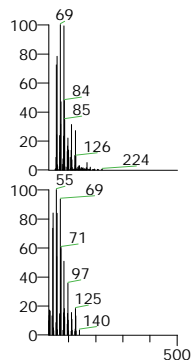

NL: 9.99E2  
131858 10.32 1 11  
22 1833-1843 1873-1883  
5.82E7 + c EI Full ms  
[50.00-500.00]

NL: 9.99E2  
SI 849, RSI 927, mainlib,  
Entry# 18829, CAS#  
6750-34-1, 1-Dodecanol,  
3,7,11-trimethyl-

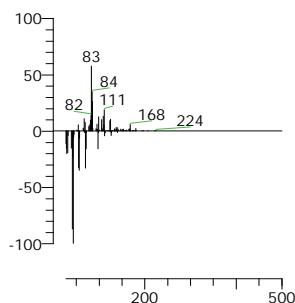

1-Dodecanol, 3,7,11-trimethyl-  
Formula C<sub>15</sub>H<sub>32</sub>O, MW 228, CAS# 6750-34-1, Entry# 18829  
Hexa-hydro-farnesol

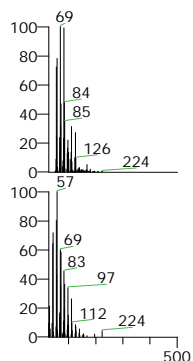

NL: 9.99E2  
131858 10.32 1 11  
22 1833-1843 1873-1883  
5.82E7 + c EI Full ms  
[50.00-500.00]

NL: 9.99E2  
SI 869, RSI 923, mainlib,  
Entry# 23004, CAS#  
2425-77-6, 1-Decanol,  
2-hexyl-

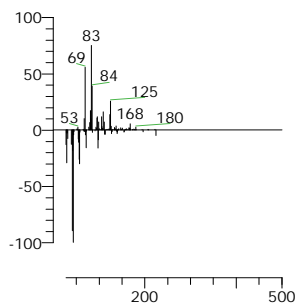

1-Decanol, 2-hexyl-  
Formula C<sub>16</sub>H<sub>34</sub>O, MW 242, CAS# 2425-77-6, Entry# 23004  
2-Hexyl-1-decanol

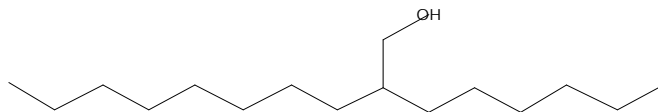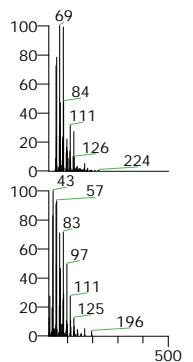

NL: 9.99E2  
131858 10.32 1 11  
22 1833-1843 1873-1883  
5.82E7 + c EI Full ms  
[50.00-500.00]

NL: 9.99E2  
SI 873, RSI 922, mainlib,  
Entry# 7343, CAS#  
83005-02-1,  
Dichloroacetic acid,  
tetradecyl ester

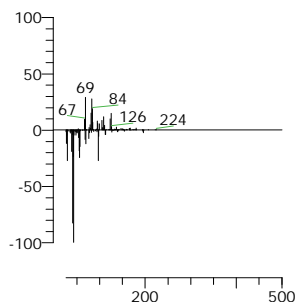

Dichloroacetic acid, tetradecyl ester  
Formula C<sub>16</sub>H<sub>30</sub>Cl<sub>2</sub>O<sub>2</sub>, MW 324, CAS# 83005-02-1, Entry# 7343  
Tetradecyl dichloroacetate #

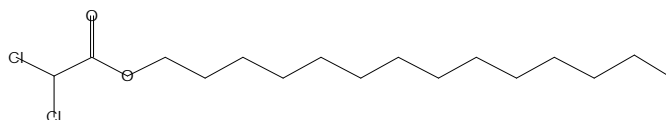

## Hit Spectrum

## Delta

## Compound Structure

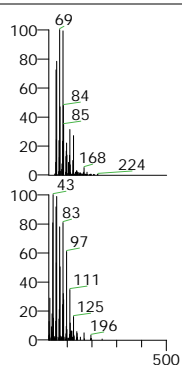

NL: 9.99E2  
 131858 10.32 1 11 22  
 1833-1843 1873-1883  
 5.82E7 + c EI Full ms  
 [50.00-500.00]

NL: 9.99E2  
 SI 876, RSI 917, mainlib,  
 Entry# 7359, CAS#  
 74339-52-9,  
 Trichloroacetic acid,  
 tetradecyl ester

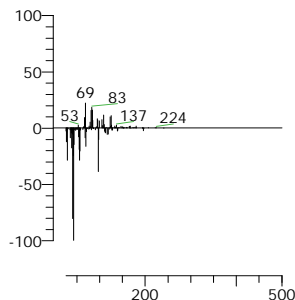

Trichloroacetic acid, tetradecyl ester  
 Formula C16H29Cl3O2, MW 358, CAS# 74339-52-9, Entry# 7359  
 Tetradecyl trichloroacetate #

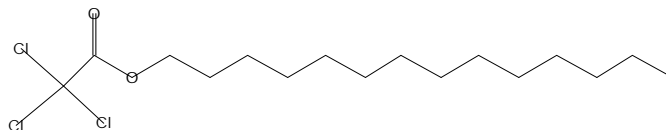

| RT    | Compound Name                  | Area       | Area % | RSI | Cas #      | Library |
|-------|--------------------------------|------------|--------|-----|------------|---------|
| 10.32 | 10-Heneicosene (c,t)           | 1402821131 | 0.93   | 932 | 95008-11-0 | mainlib |
| 10.32 | 1-Dodecanol, 3,7,11-trimethyl- | 1402821131 | 0.93   | 927 | 6750-34-1  | mainlib |
| 10.32 | 1-Decanol, 2-hexyl-            | 1402821131 | 0.93   | 923 | 2425-77-6  | mainlib |

## Hit Spectrum

## Delta

## Compound Structure

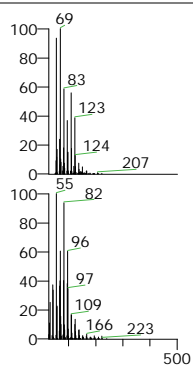

NL: 9.99E2  
131884 10.40 1 11  
22 1859-1869 1899-1909  
5.60E7 + c EI Full ms  
[50.00-500.00]

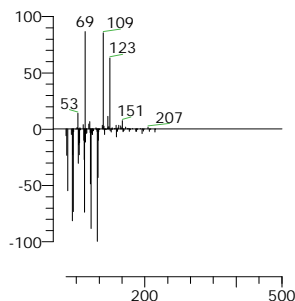

1,16-Hexadecanediol  
Formula C<sub>16</sub>H<sub>34</sub>O<sub>2</sub>, MW 258, CAS# 7735-42-4, Entry# 19250

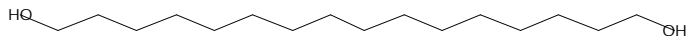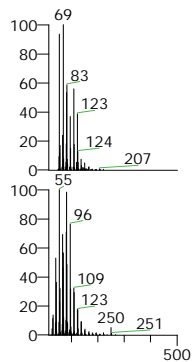

NL: 9.99E2  
131884 10.40 1 11  
22 1859-1869 1899-1909  
5.60E7 + c EI Full ms  
[50.00-500.00]

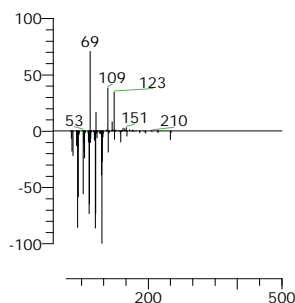

9-Octadecen-1-ol, (Z)-  
Formula C<sub>18</sub>H<sub>36</sub>O, MW 268, CAS# 143-28-2, Entry# 19267  
cis-9-Octadecen-1-ol

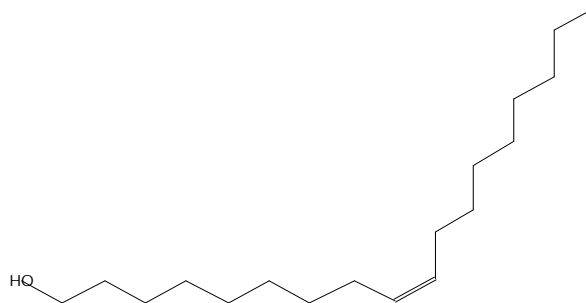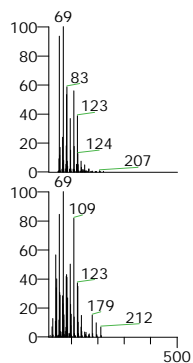

NL: 9.99E2  
131884 10.40 1 11  
22 1859-1869 1899-1909  
5.60E7 + c EI Full ms  
[50.00-500.00]

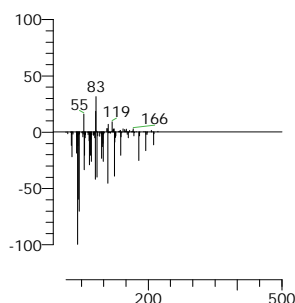

Methyl tetrahydroinonol  
Formula C<sub>14</sub>H<sub>28</sub>O, MW 212, CAS# 60241-53-4, Entry# 32148  
Cyclohexanepropanol, ð,ð,2,2,6-pentamethyl-

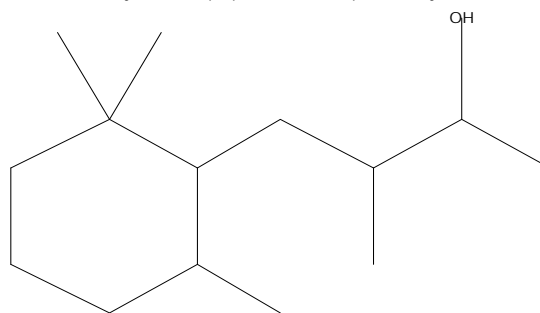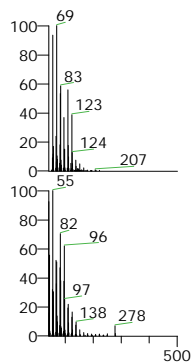

NL: 9.99E2  
131884 10.40 1 11  
22 1859-1869 1899-1909  
5.60E7 + c EI Full ms  
[50.00-500.00]

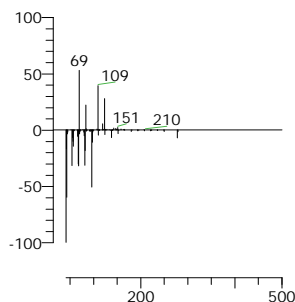

Eicosen-1-ol, cis-9-  
Formula C<sub>20</sub>H<sub>40</sub>O, MW 296, CAS# 112248-30-3, Entry# 18153  
(9Z)-9-Icosen-1-ol #

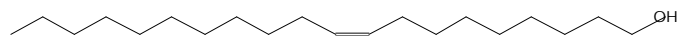



## Hit Spectrum

## Delta

## Compound Structure

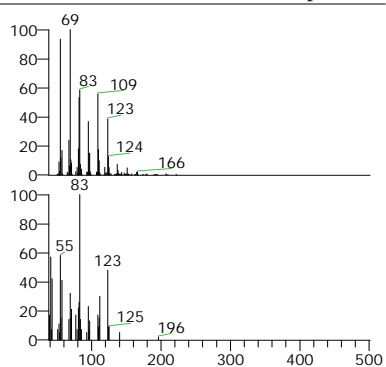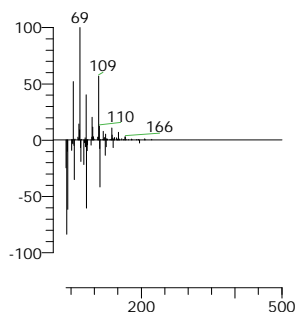

Cyclopropanol, 1-(3,7-dimethyl-1-octenyl)-  
 Formula C<sub>13</sub>H<sub>24</sub>O, MW 196, CAS# 65147-72-0, Entry# 47465  
 1-[(1E)-3,7-Dimethyl-1-octenyl]cyclopropanol #

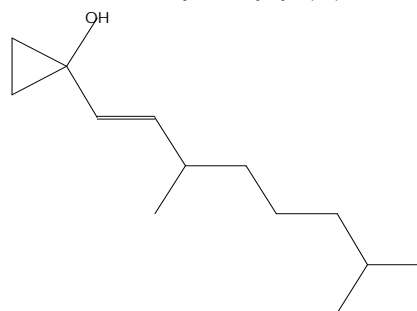

| RT    | Compound Name          | Area      | Area % | RSI | Cas #      | Library |
|-------|------------------------|-----------|--------|-----|------------|---------|
| 10.40 | 1,16-Hexadecanediol    | 920715705 | 0.61   | 866 | 7735-42-4  | mainlib |
| 10.40 | 9-Octadecen-1-ol, (Z)- | 920715705 | 0.61   | 855 | 143-28-2   | mainlib |
| 10.40 | Methyl tetrahydroionol | 920715705 | 0.61   | 847 | 60241-53-4 | mainlib |

## Hit Spectrum

## Delta

## Compound Structure

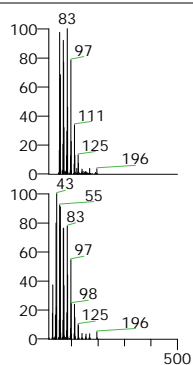

NL: 9.98E2  
131938 10.58 1 11  
22 1913-1923 1953-1963  
1.19E8 + c EI Full ms  
[50.00-500.00]

NL: 9.99E2  
SI 958, RSI 981, mainlib,  
Entry# 6847, CAS#  
1120-36-1,  
1-Tetradecene

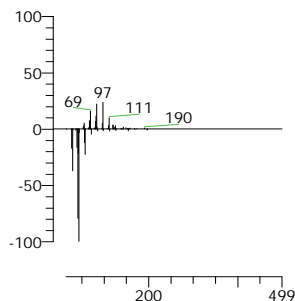

1-Tetradecene  
Formula C<sub>14</sub>H<sub>28</sub>, MW 196, CAS# 1120-36-1, Entry# 6847  
n-Tetradec-1-ene

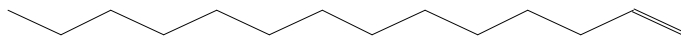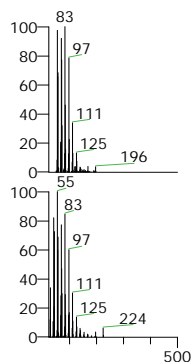

NL: 9.98E2  
131938 10.58 1 11  
22 1913-1923 1953-1963  
1.19E8 + c EI Full ms  
[50.00-500.00]

NL: 9.99E2  
SI 947, RSI 972, mainlib,  
Entry# 19398, CAS#  
295-65-8,  
Cyclohexadecane

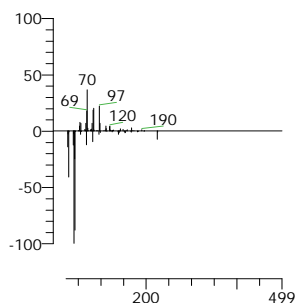

Cyclohexadecane  
Formula C<sub>16</sub>H<sub>32</sub>, MW 224, CAS# 295-65-8, Entry# 19398

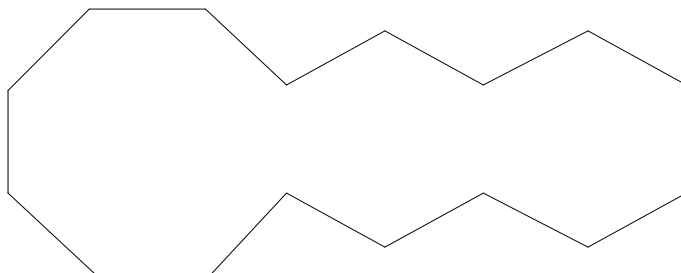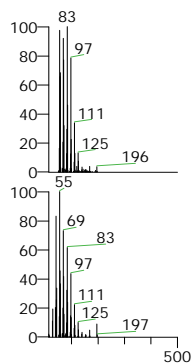

NL: 9.98E2  
131938 10.58 1 11  
22 1913-1923 1953-1963  
1.19E8 + c EI Full ms  
[50.00-500.00]

NL: 9.99E2  
SI 946, RSI 972, mainlib,  
Entry# 17995, CAS#  
295-17-0,  
Cyclotetradecane

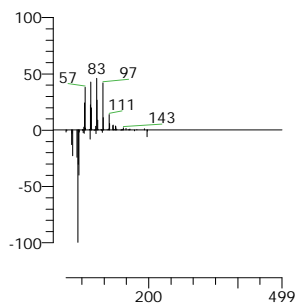

Cyclotetradecane  
Formula C<sub>14</sub>H<sub>28</sub>, MW 196, CAS# 295-17-0, Entry# 17995

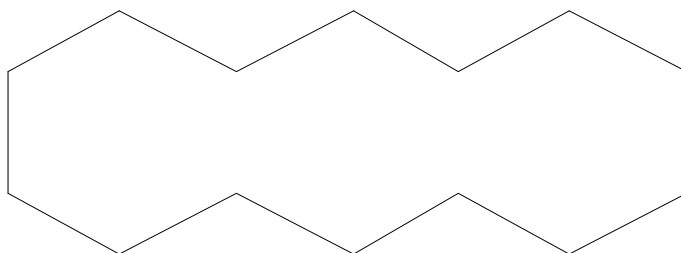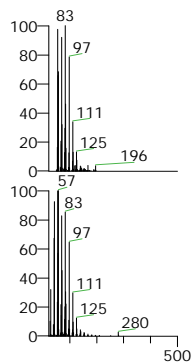

NL: 9.98E2  
131938 10.58 1 11  
22 1913-1923 1953-1963  
1.19E8 + c EI Full ms  
[50.00-500.00]

NL: 9.99E2  
SI 934, RSI 971, mainlib,  
Entry# 23002, CAS#  
74685-29-3, 9-Eicosene,  
(E)-

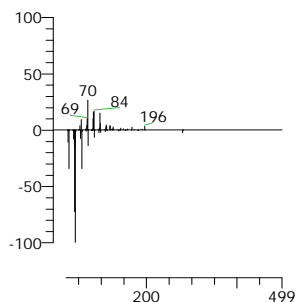

9-Eicosene, (E)-  
Formula C<sub>20</sub>H<sub>40</sub>, MW 280, CAS# 74685-29-3, Entry# 23002  
(9E)-9-Icosene #

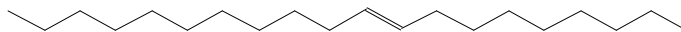

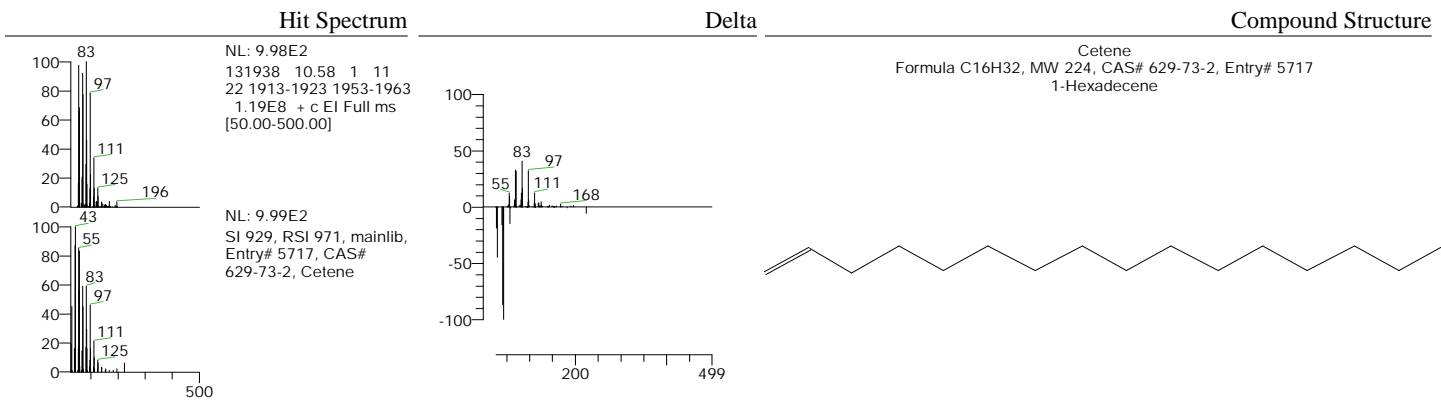

| RT    | Compound Name    | Area       | Area % | RSI | Cas #     | Library |
|-------|------------------|------------|--------|-----|-----------|---------|
| 10.58 | 1-Tetradecene    | 5410424752 | 3.59   | 981 | 1120-36-1 | mainlib |
| 10.58 | Cyclotetradecane | 5410424752 | 3.59   | 972 | 295-17-0  | mainlib |
| 10.58 | Cyclohexadecane  | 5410424752 | 3.59   | 972 | 295-65-8  | mainlib |

## Hit Spectrum

## Delta

## Compound Structure

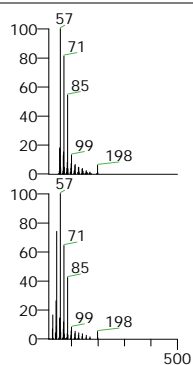

NL: 9.98E2  
131962 10.66 1 11  
22 1937-1947 1977-1987  
2.59E8 + c EI Full ms  
[50.00-500.00]

NL: 9.99E2  
SI 958, RSI 984, mainlib,  
Entry# 22616, CAS#  
629-59-4, Tetradecane

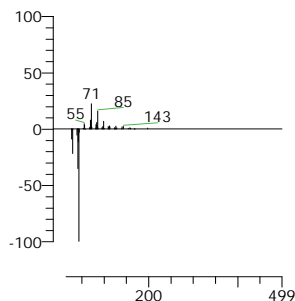

Tetradecane  
Formula C<sub>14</sub>H<sub>30</sub>, MW 198, CAS# 629-59-4, Entry# 22616  
n-Tetradecane

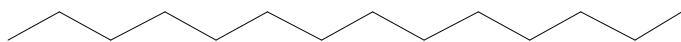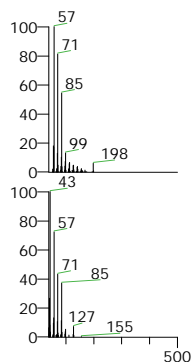

NL: 9.98E2  
131962 10.66 1 11  
22 1937-1947 1977-1987  
2.59E8 + c EI Full ms  
[50.00-500.00]

NL: 9.99E2  
SI 836, RSI 968, mainlib,  
Entry# 7452, CAS#  
62108-27-4, Decane,  
2,4,6-trimethyl-

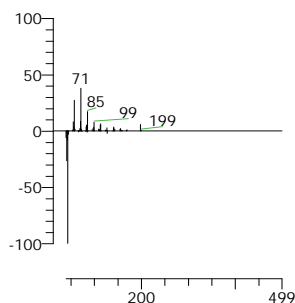

Decane, 2,4,6-trimethyl-  
Formula C<sub>13</sub>H<sub>28</sub>, MW 184, CAS# 62108-27-4, Entry# 7452  
2,4,6-Trimethyldecane #

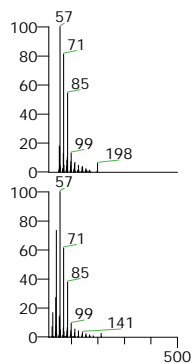

NL: 9.98E2  
131962 10.66 1 11  
22 1937-1947 1977-1987  
2.59E8 + c EI Full ms  
[50.00-500.00]

NL: 9.99E2  
SI 931, RSI 964, mainlib,  
Entry# 22638, CAS#  
629-62-9, Pentadecane

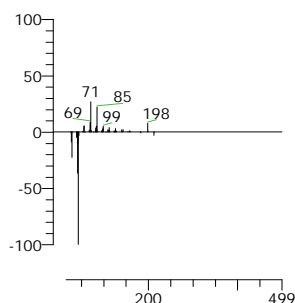

Pentadecane  
Formula C<sub>15</sub>H<sub>32</sub>, MW 212, CAS# 629-62-9, Entry# 22638  
n-Pentadecane

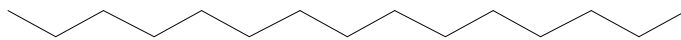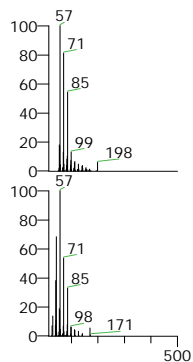

NL: 9.98E2  
131962 10.66 1 11  
22 1937-1947 1977-1987  
2.59E8 + c EI Full ms  
[50.00-500.00]

NL: 9.99E2  
SI 899, RSI 957, mainlib,  
Entry# 22550, CAS#  
112-40-3, Dodecane

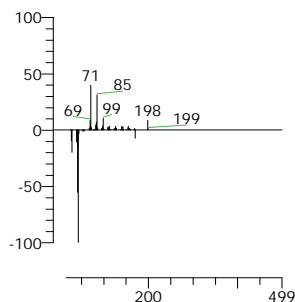

Dodecane  
Formula C<sub>12</sub>H<sub>26</sub>, MW 170, CAS# 112-40-3, Entry# 22550  
n-Dodecane

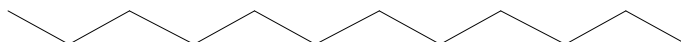

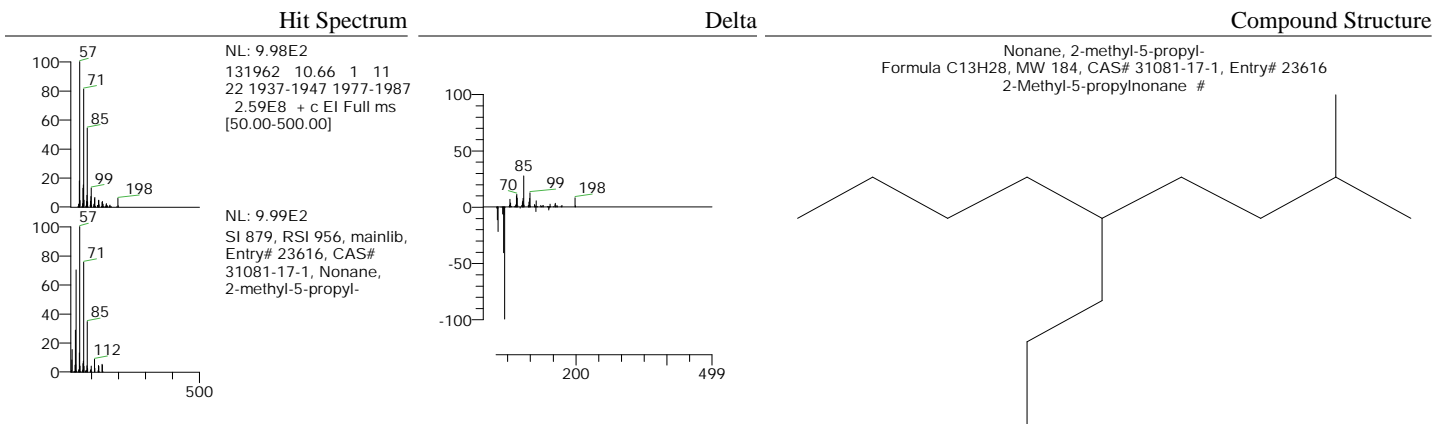

| RT    | Compound Name            | Area       | Area % | RSI | Cas #      | Library |
|-------|--------------------------|------------|--------|-----|------------|---------|
| 10.66 | Tetradecane              | 3804973538 | 2.53   | 984 | 629-59-4   | mainlib |
| 10.66 | Decane, 2,4,6-trimethyl- | 3804973538 | 2.53   | 968 | 62108-27-4 | mainlib |
| 10.66 | Pentadecane              | 3804973538 | 2.53   | 964 | 629-62-9   | mainlib |

## Hit Spectrum

## Delta

## Compound Structure

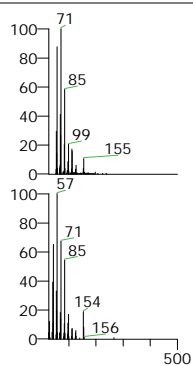

NL: 9.98E2  
132145 11.29 1 11  
22 2120-2130 2160-2170  
6.14E7 + c EI Full ms  
[50.00-500.00]

NL: 9.99E2  
SI 889, RSI 934, mainlib,  
Entry# 23599, CAS#  
56862-62-5,  
10-Methylnonadecane

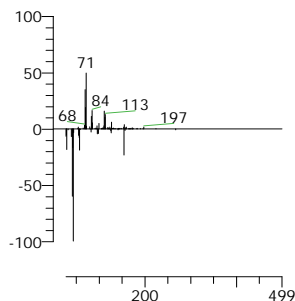

10-Methylnonadecane  
Formula C<sub>20</sub>H<sub>42</sub>, MW 282, CAS# 56862-62-5, Entry# 23599  
Nonadecane, 10-methyl

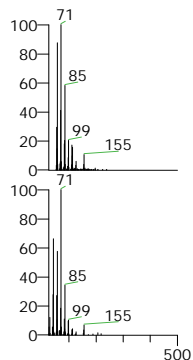

NL: 9.98E2  
132145 11.29 1 11  
22 2120-2130 2160-2170  
6.14E7 + c EI Full ms  
[50.00-500.00]

NL: 9.99E2  
SI 879, RSI 928, mainlib,  
Entry# 35060, CAS# NA,  
Sulfurous acid, pentyl  
undecyl ester

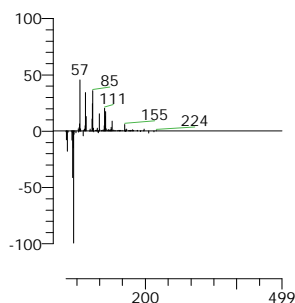

Sulfurous acid, pentyl undecyl ester  
Formula C<sub>16</sub>H<sub>34</sub>O<sub>3</sub>S, MW 306, CAS# NA, Entry# 35060

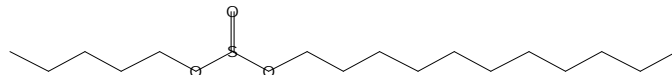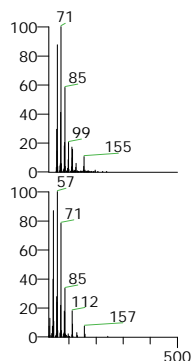

NL: 9.98E2  
132145 11.29 1 11  
22 2120-2130 2160-2170  
6.14E7 + c EI Full ms  
[50.00-500.00]

NL: 9.99E2  
SI 808, RSI 926, mainlib,  
Entry# 22518, CAS# NA,  
Oxalic acid, 2-ethylhexyl  
isohexyl ester

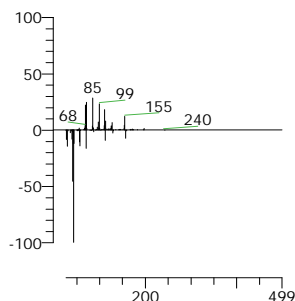

Oxalic acid, 2-ethylhexyl isohexyl ester  
Formula C<sub>16</sub>H<sub>30</sub>O<sub>4</sub>, MW 286, CAS# NA, Entry# 22518

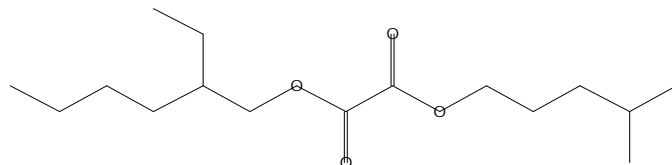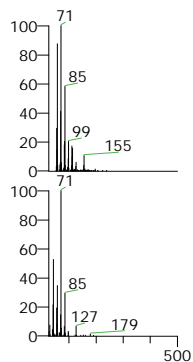

NL: 9.98E2  
132145 11.29 1 11  
22 2120-2130 2160-2170  
6.14E7 + c EI Full ms  
[50.00-500.00]

NL: 9.99E2  
SI 740, RSI 926, mainlib,  
Entry# 35058, CAS# NA,  
Sulfurous acid, nonyl  
pentyl ester

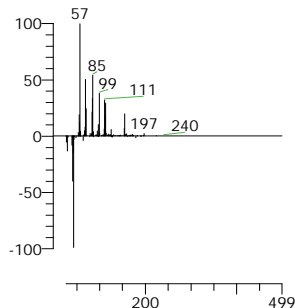

Sulfurous acid, nonyl pentyl ester  
Formula C<sub>14</sub>H<sub>30</sub>O<sub>3</sub>S, MW 278, CAS# NA, Entry# 35058

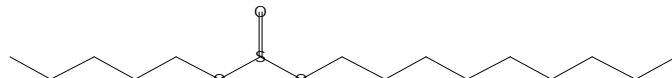

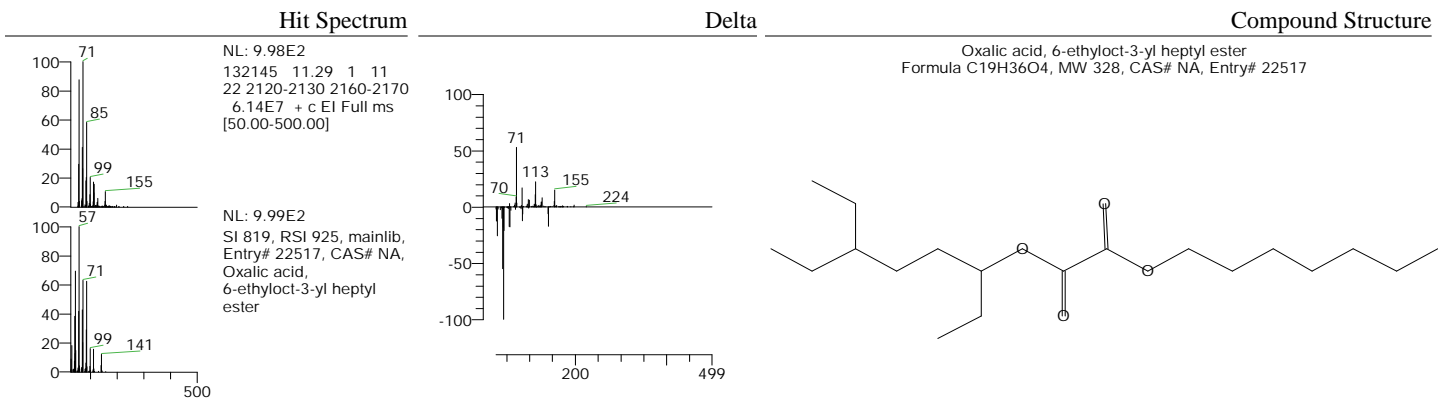

| RT    | Compound Name                            | Area       | Area % | RSI | Cas #      | Library |
|-------|------------------------------------------|------------|--------|-----|------------|---------|
| 11.29 | 10-Methylnonadecane                      | 1681891823 | 1.12   | 934 | 56862-62-5 | mainlib |
| 11.29 | Sulfurous acid, pentyl undecyl ester     | 1681891823 | 1.12   | 928 | NA         | mainlib |
| 11.29 | Oxalic acid, 2-ethylhexyl isohexyl ester | 1681891823 | 1.12   | 926 | NA         | mainlib |

## Hit Spectrum

## Delta

## Compound Structure

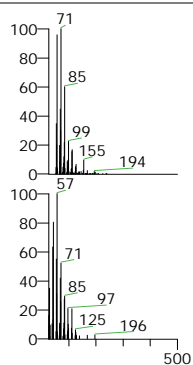

NL: 9.99E2  
132180 11.41 1 11  
22 2155-2165 2195-2205  
5.25E7 + c EI Full ms  
[50.00-500.00]

NL: 9.99E2  
SI 862, RSI 928, mainlib,  
Entry# 22406, CAS#  
19780-79-1,  
2-Hexyl-1-octanol

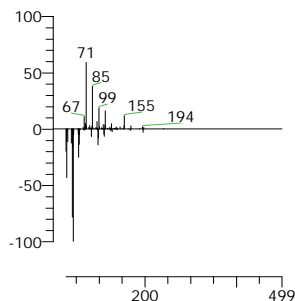

2-Hexyl-1-octanol  
Formula C14H30O, MW 214, CAS# 19780-79-1, Entry# 22406

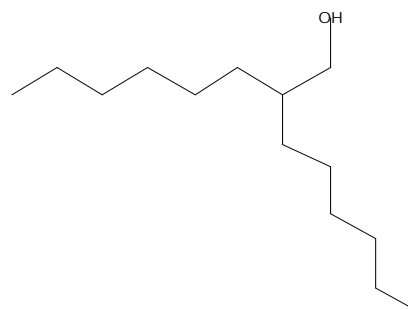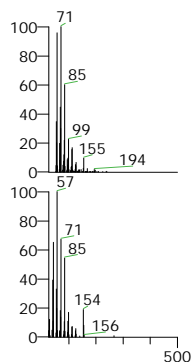

NL: 9.99E2  
132180 11.41 1 11  
22 2155-2165 2195-2205  
5.25E7 + c EI Full ms  
[50.00-500.00]

NL: 9.99E2  
SI 864, RSI 927, mainlib,  
Entry# 23599, CAS#  
56862-62-5,  
10-Methylnonadecane

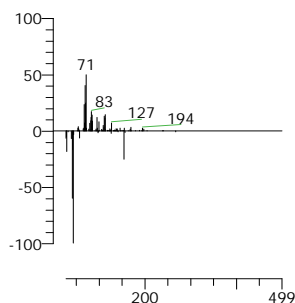

10-Methylnonadecane  
Formula C20H42, MW 282, CAS# 56862-62-5, Entry# 23599  
Nonadecane, 10-methyl

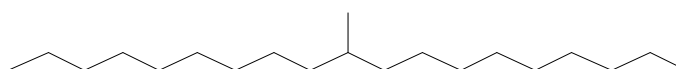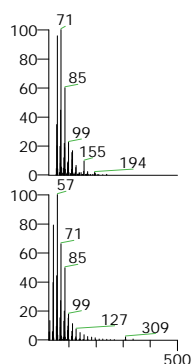

NL: 9.99E2  
132180 11.41 1 11  
22 2155-2165 2195-2205  
5.25E7 + c EI Full ms  
[50.00-500.00]

NL: 9.99E2  
SI 901, RSI 924, mainlib,  
Entry# 22537, CAS# NA,  
2-methyltetracosane

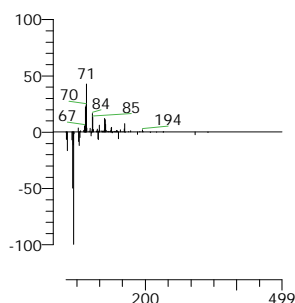

2-methyltetracosane  
Formula C25H52, MW 352, CAS# NA, Entry# 22537

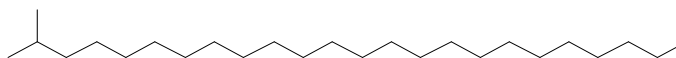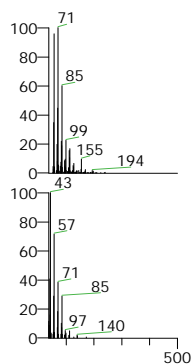

NL: 9.99E2  
132180 11.41 1 11  
22 2155-2165 2195-2205  
5.25E7 + c EI Full ms  
[50.00-500.00]

NL: 9.99E2  
SI 766, RSI 917, mainlib,  
Entry# 7242, CAS#  
29812-79-1,  
Hydroxylamine, O-decyl-

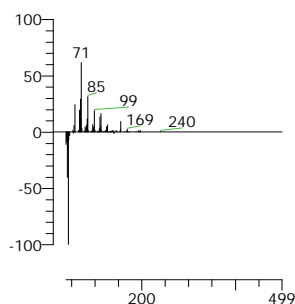

Hydroxylamine, O-decyl-  
Formula C10H23NO, MW 173, CAS# 29812-79-1, Entry# 7242  
O-Decylhydroxylamine

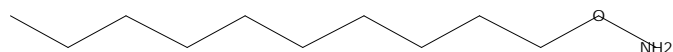



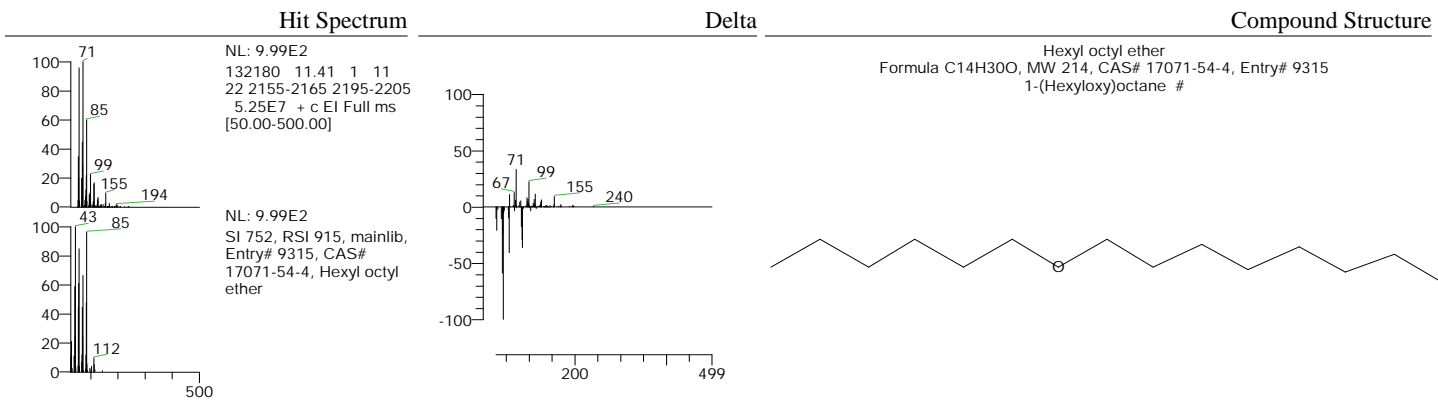

| RT    | Compound Name       | Area       | Area % | RSI | Cas #      | Library |
|-------|---------------------|------------|--------|-----|------------|---------|
| 11.41 | 2-Hexyl-1-octanol   | 1022867847 | 0.68   | 928 | 19780-79-1 | mainlib |
| 11.41 | 10-Methylnonadecane | 1022867847 | 0.68   | 927 | 56862-62-5 | mainlib |
| 11.41 | 2-methyltetracosane | 1022867847 | 0.68   | 924 | NA         | mainlib |

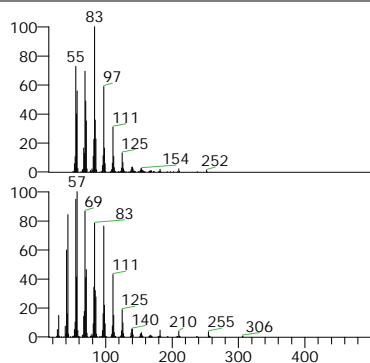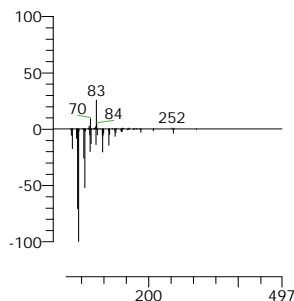

Trifluoroacetic acid, pentadecyl ester  
Formula C17H31F3O2, MW 324, CAS# 959010-23-2, Entry# 23039

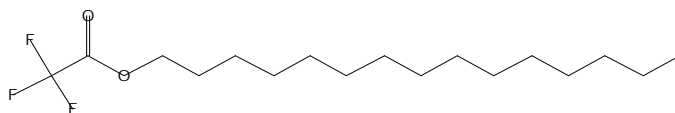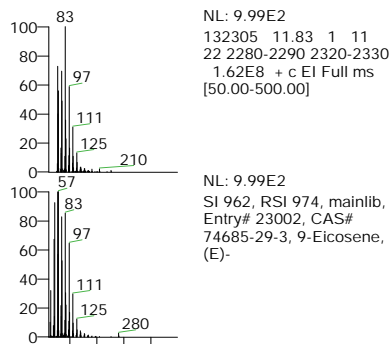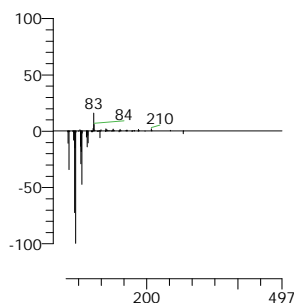

9-Eicosene, (E)-  
Formula C20H40, MW 280, CAS# 74685-29-3, Entry# 23002  
(9E)-9-Icosene #

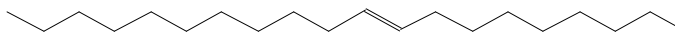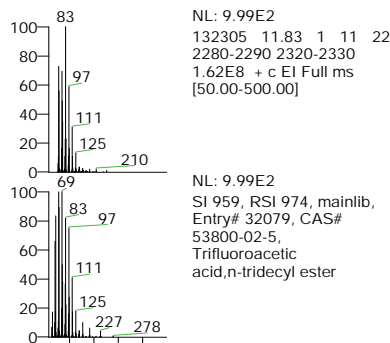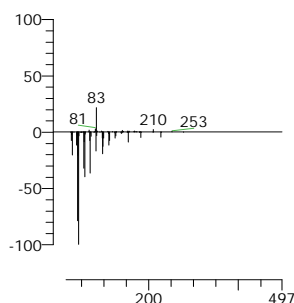

Trifluoroacetic acid, n-tridecyl ester  
Formula C15H27F3O2, MW 296, CAS# 53800-02-5, Entry# 32079  
Tridecyl trifluoroacetate #

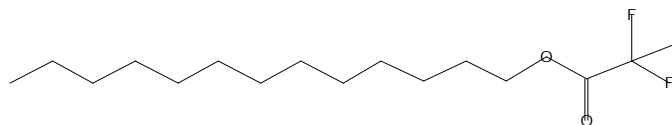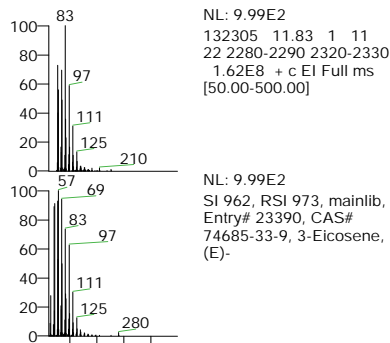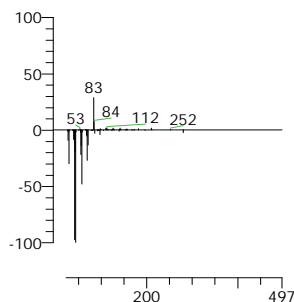

3-Eicosene, (E)-  
Formula C20H40, MW 280, CAS# 74685-33-9, Entry# 23390  
(3E)-3-Icosene #

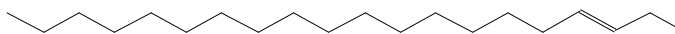

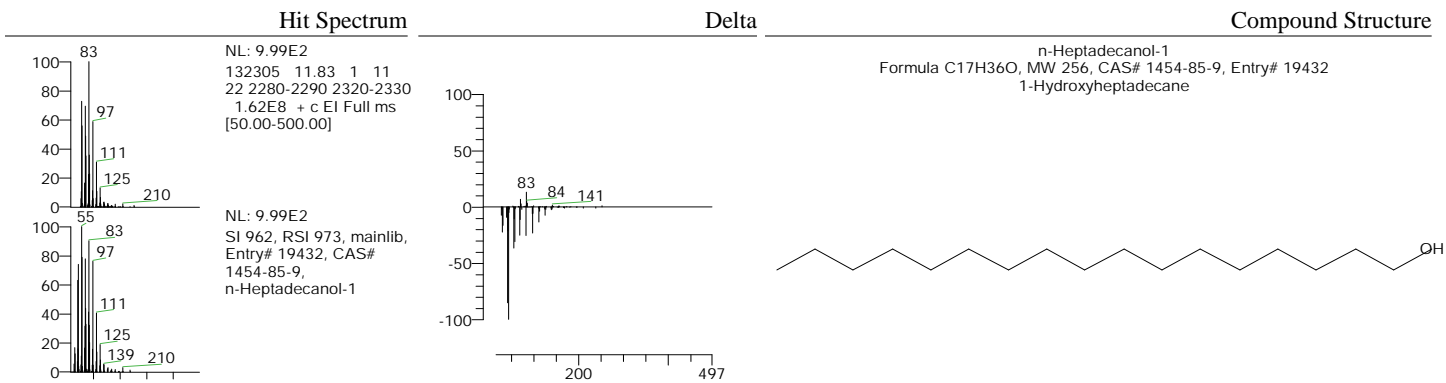

| RT    | Compound Name                          | Area       | Area % | RSI | Cas #       | Library |
|-------|----------------------------------------|------------|--------|-----|-------------|---------|
| 11.83 | Trifluoroacetic acid, pentadecyl ester | 6158870340 | 4.09   | 975 | 959010-23-2 | mainlib |
| 11.83 | Trifluoroacetic acid,n-tridecyl ester  | 6158870340 | 4.09   | 974 | 53800-02-5  | mainlib |
| 11.83 | 9-Eicosene, (E)-                       | 6158870340 | 4.09   | 974 | 74685-29-3  | mainlib |

## Hit Spectrum

## Delta

## Compound Structure

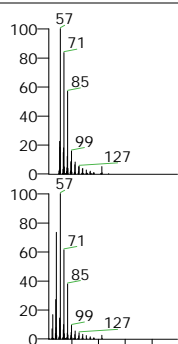

NL: 9.98E2  
132327 11.91 1 11  
22 2302-2312 2342-2352  
2.44E8 + c EI Full ms  
[50.00-500.00]

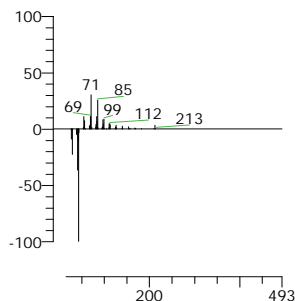

Pentadecane  
Formula C<sub>15</sub>H<sub>32</sub>, MW 212, CAS# 629-62-9, Entry# 22638  
n-Pentadecane

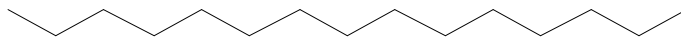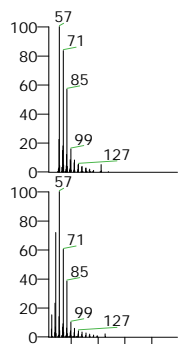

NL: 9.98E2  
132327 11.91 1 11  
22 2302-2312 2342-2352  
2.44E8 + c EI Full ms  
[50.00-500.00]

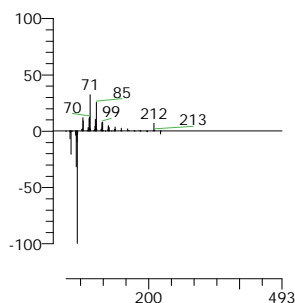

Hexadecane  
Formula C<sub>16</sub>H<sub>34</sub>, MW 226, CAS# 544-76-3, Entry# 22719  
n-Cetane

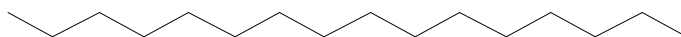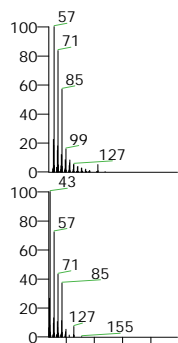

NL: 9.98E2  
132327 11.91 1 11  
22 2302-2312 2342-2352  
2.44E8 + c EI Full ms  
[50.00-500.00]

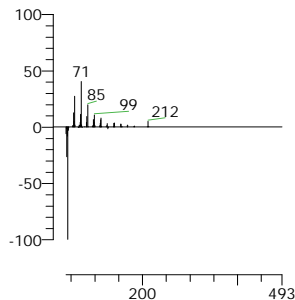

Decane, 2,4,6-trimethyl-  
Formula C<sub>13</sub>H<sub>28</sub>, MW 184, CAS# 62108-27-4, Entry# 7452  
2,4,6-Trimethyldecane #

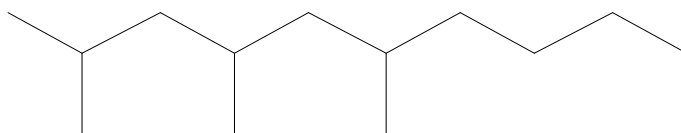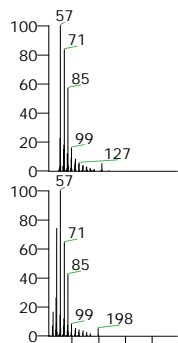

NL: 9.98E2  
132327 11.91 1 11  
22 2302-2312 2342-2352  
2.44E8 + c EI Full ms  
[50.00-500.00]

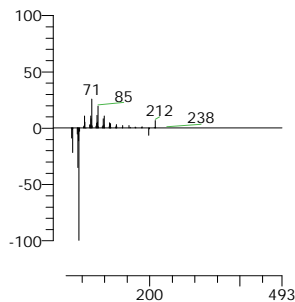

Tetradecane  
Formula C<sub>14</sub>H<sub>30</sub>, MW 198, CAS# 629-59-4, Entry# 22616  
n-Tetradecane

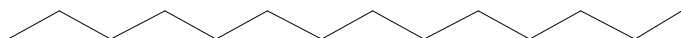

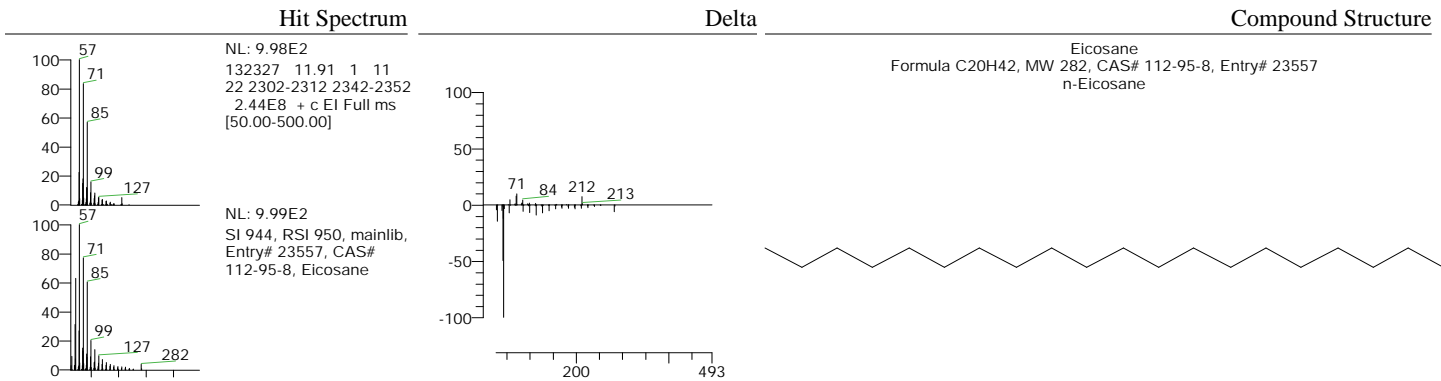

| RT    | Compound Name            | Area       | Area % | RSI | Cas #      | Library |
|-------|--------------------------|------------|--------|-----|------------|---------|
| 11.91 | Pentadecane              | 3994681734 | 2.65   | 968 | 629-62-9   | mainlib |
| 11.91 | Hexadecane               | 3994681734 | 2.65   | 962 | 544-76-3   | mainlib |
| 11.91 | Decane, 2,4,6-trimethyl- | 3994681734 | 2.65   | 955 | 62108-27-4 | mainlib |

## Hit Spectrum

## Delta

## Compound Structure

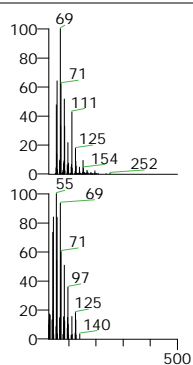

NL: 9.99E2  
132416 12.21 1 11  
22 2391-2401 2431-2441  
1.35E8 + c EI Full ms  
[50.00-500.00]

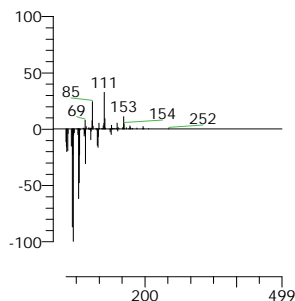

1-Dodecanol, 3,7,11-trimethyl-  
Formula C15H32O, MW 228, CAS# 6750-34-1, Entry# 18829  
Hexa-hydro-farnesol

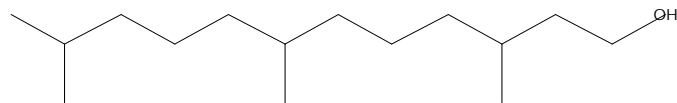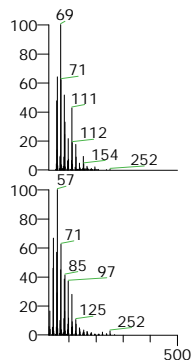

NL: 9.99E2  
132416 12.21 1 11  
22 2391-2401 2431-2441  
1.35E8 + c EI Full ms  
[50.00-500.00]

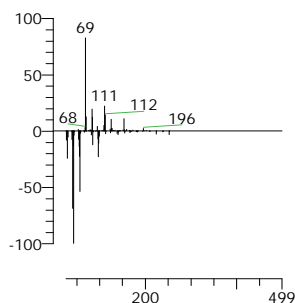

1-Dodecanol, 2-hexyl-  
Formula C18H38O, MW 270, CAS# 110225-00-8, Entry# 22630  
2-Hexyldodecan-1-ol

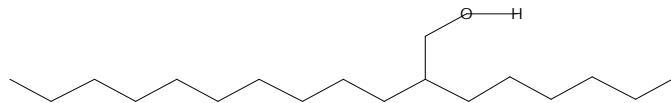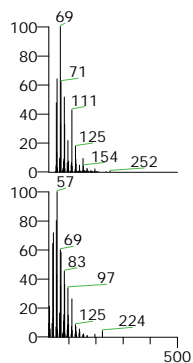

NL: 9.99E2  
132416 12.21 1 11  
22 2391-2401 2431-2441  
1.35E8 + c EI Full ms  
[50.00-500.00]

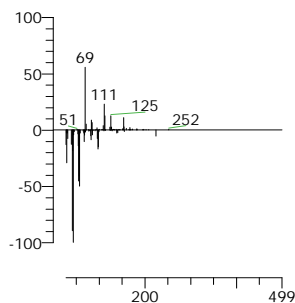

1-Decanol, 2-hexyl-  
Formula C16H34O, MW 242, CAS# 2425-77-6, Entry# 23004  
2-Hexyl-1-decanol

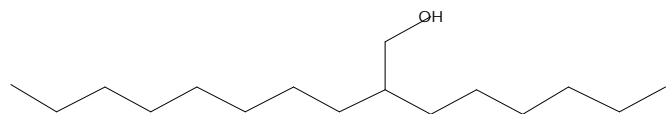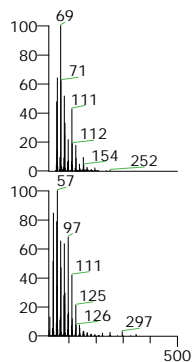

NL: 9.99E2  
132416 12.21 1 11  
22 2391-2401 2431-2441  
1.35E8 + c EI Full ms  
[50.00-500.00]

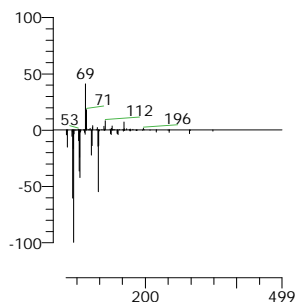

Octadecyl trifluoroacetate  
Formula C20H37F3O2, MW 366, CAS# 79392-43-1, Entry# 22467  
Octadecyl 2,2,2-trifluoroacetate

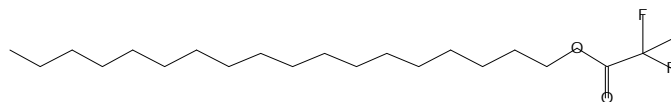

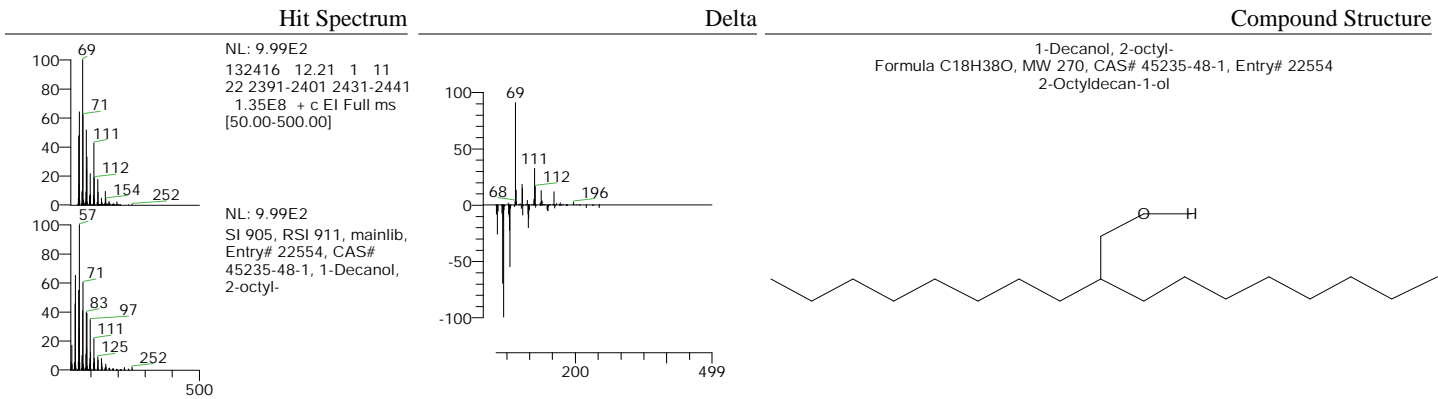

| RT    | Compound Name                  | Area       | Area % | RSI | Cas #       | Library |
|-------|--------------------------------|------------|--------|-----|-------------|---------|
| 12.21 | 1-Dodecanol, 3,7,11-trimethyl- | 2695952813 | 1.79   | 925 | 6750-34-1   | mainlib |
| 12.21 | 1-Dodecanol, 2-hexyl-          | 2695952813 | 1.79   | 920 | 110225-00-8 | mainlib |
| 12.21 | 1-Decanol, 2-hexyl-            | 2695952813 | 1.79   | 918 | 2425-77-6   | mainlib |

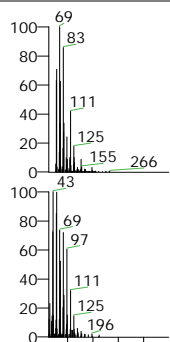

NL: 9.99E2  
132446 12.31 1 11  
22 2421-2431 2461-2471  
6.08E7 + c EI Full ms  
[50.00-500.00]

NL: 9.99E2  
SI 884, RSI 923, mainlib,  
Entry# 7365, CAS#  
74339-54-1,  
Trichloroacetic acid,  
hexadecyl ester

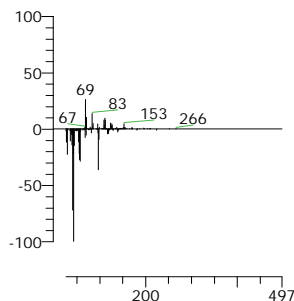

Trichloroacetic acid, hexadecyl ester  
Formula C<sub>18</sub>H<sub>33</sub>Cl<sub>3</sub>O<sub>2</sub>, MW 386, CAS# 74339-54-1, Entry# 7365  
Hexadecyl trichloroacetate #

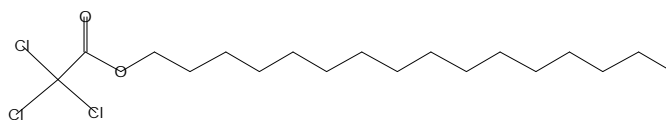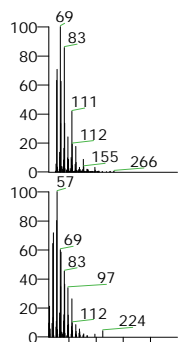

NL: 9.99E2  
132446 12.31 1 11  
22 2421-2431 2461-2471  
6.08E7 + c EI Full ms  
[50.00-500.00]

NL: 9.99E2  
SI 873, RSI 921, mainlib,  
Entry# 23004, CAS#  
2425-77-6, 1-Decanol,  
2-hexyl-

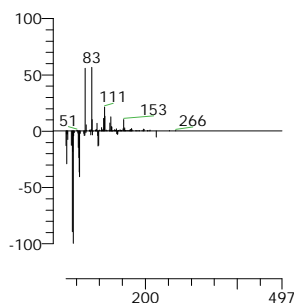

1-Decanol, 2-hexyl-  
Formula C<sub>16</sub>H<sub>34</sub>O, MW 242, CAS# 2425-77-6, Entry# 23004  
2-Hexyl-1-decanol

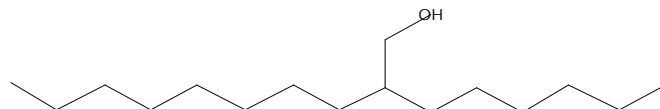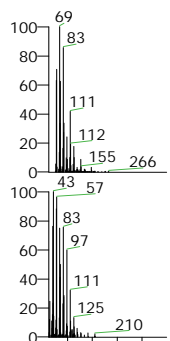

NL: 9.99E2  
132446 12.31 1 11  
22 2421-2431 2461-2471  
6.08E7 + c EI Full ms  
[50.00-500.00]

NL: 9.99E2  
SI 878, RSI 917, mainlib,  
Entry# 7360, CAS#  
74339-53-0,  
Trichloroacetic acid,  
pentadecyl ester

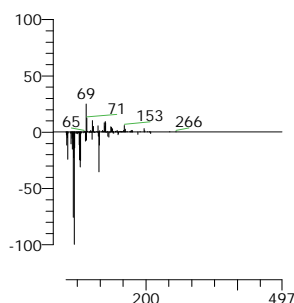

Trichloroacetic acid, pentadecyl ester  
Formula C<sub>17</sub>H<sub>31</sub>Cl<sub>3</sub>O<sub>2</sub>, MW 372, CAS# 74339-53-0, Entry# 7360  
Pentadecyl trichloroacetate #

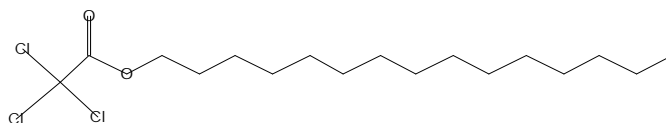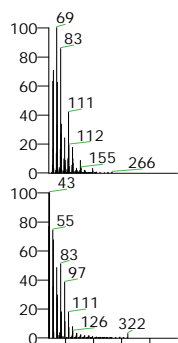

NL: 9.99E2  
132446 12.31 1 11  
22 2421-2431 2461-2471  
6.08E7 + c EI Full ms  
[50.00-500.00]

NL: 9.99E2  
SI 769, RSI 915, mainlib,  
Entry# 5718, CAS#  
52078-56-5, 11-Tricosene

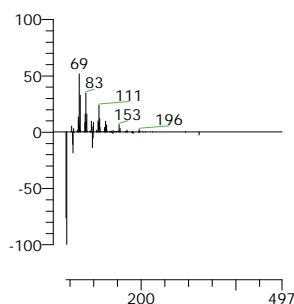

11-Tricosene  
Formula C<sub>23</sub>H<sub>46</sub>, MW 322, CAS# 52078-56-5, Entry# 5718  
(11E)-11-Tricosene #

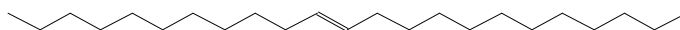



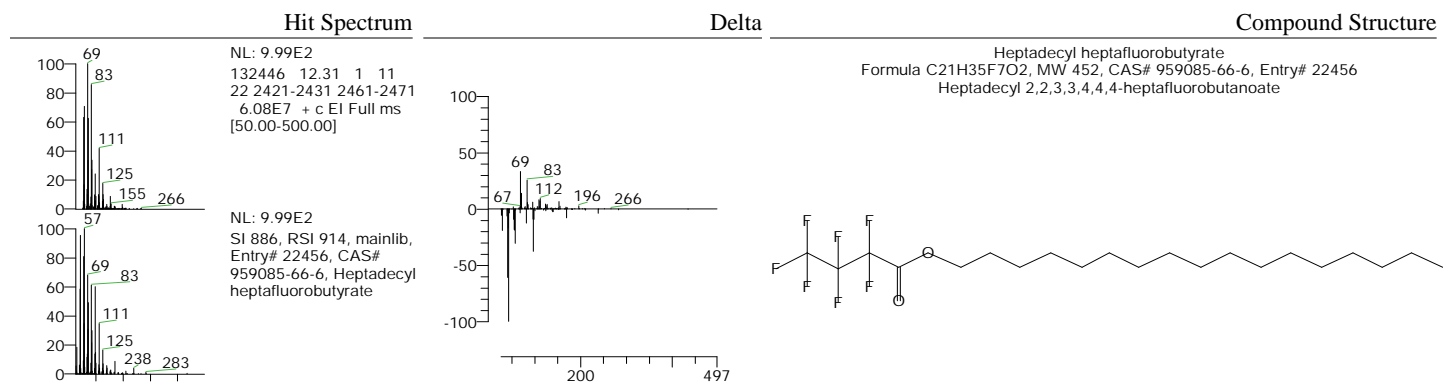

| RT    | Compound Name                          | Area       | Area % | RSI | Cas #      | Library |
|-------|----------------------------------------|------------|--------|-----|------------|---------|
| 12.31 | Trichloroacetic acid, hexadecyl ester  | 1831951594 | 1.22   | 923 | 74339-54-1 | mainlib |
| 12.31 | 1-Decanol, 2-hexyl-                    | 1831951594 | 1.22   | 921 | 2425-77-6  | mainlib |
| 12.31 | Trichloroacetic acid, pentadecyl ester | 1831951594 | 1.22   | 917 | 74339-53-0 | mainlib |

Analysed By:

Checked By:

## Hit Spectrum

## Delta

## Compound Structure

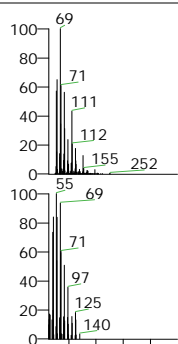

NL: 9.99E2  
132505 12.52 1 11  
22 2480-2490 2520-2530  
7.67E7 + c EI Full ms  
[50.00-500.00]

NL: 9.99E2  
SI 836, RSI 936, mainlib,  
Entry# 18829, CAS#  
6750-34-1, 1-Dodecanol,  
3,7,11-trimethyl-

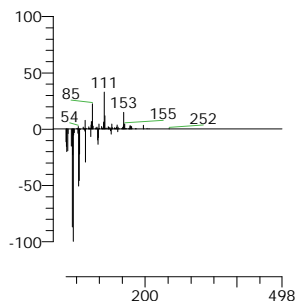

1-Dodecanol, 3,7,11-trimethyl-  
Formula C<sub>15</sub>H<sub>32</sub>O, MW 228, CAS# 6750-34-1, Entry# 18829  
Hexa-hydro-farnesol

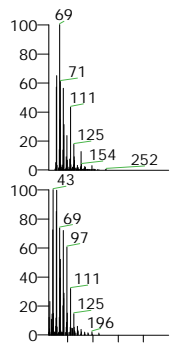

NL: 9.99E2  
132505 12.52 1 11  
22 2480-2490 2520-2530  
7.67E7 + c EI Full ms  
[50.00-500.00]

NL: 9.99E2  
SI 896, RSI 930, mainlib,  
Entry# 7365, CAS#  
74339-54-1,  
Trichloroacetic acid,  
hexadecyl ester

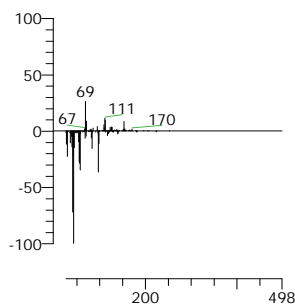

Trichloroacetic acid, hexadecyl ester  
Formula C<sub>18</sub>H<sub>33</sub>Cl<sub>3</sub>O<sub>2</sub>, MW 386, CAS# 74339-54-1, Entry# 7365  
Hexadecyl trichloroacetate #

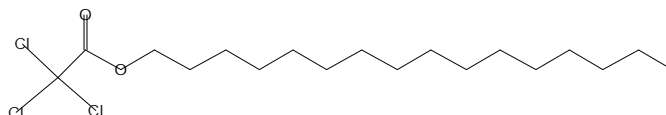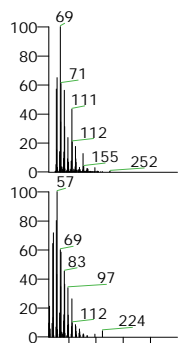

NL: 9.99E2  
132505 12.52 1 11  
22 2480-2490 2520-2530  
7.67E7 + c EI Full ms  
[50.00-500.00]

NL: 9.99E2  
SI 879, RSI 926, mainlib,  
Entry# 23004, CAS#  
2425-77-6, 1-Decanol,  
2-hexyl-

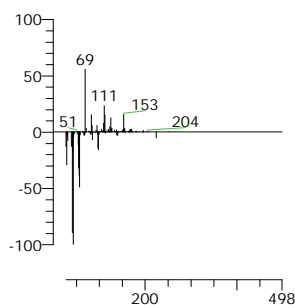

1-Decanol, 2-hexyl-  
Formula C<sub>16</sub>H<sub>34</sub>O, MW 242, CAS# 2425-77-6, Entry# 23004  
2-Hexyl-1-decanol

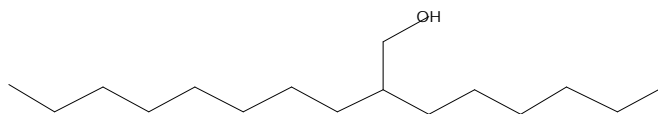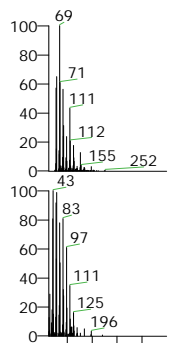

NL: 9.99E2  
132505 12.52 1 11  
22 2480-2490 2520-2530  
7.67E7 + c EI Full ms  
[50.00-500.00]

NL: 9.99E2  
SI 876, RSI 924, mainlib,  
Entry# 7359, CAS#  
74339-52-9,  
Trichloroacetic acid,  
tetradecyl ester

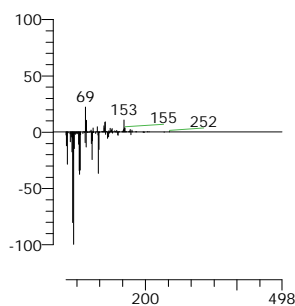

Trichloroacetic acid, tetradecyl ester  
Formula C<sub>16</sub>H<sub>29</sub>Cl<sub>3</sub>O<sub>2</sub>, MW 358, CAS# 74339-52-9, Entry# 7359  
Tetradecyl trichloroacetate #

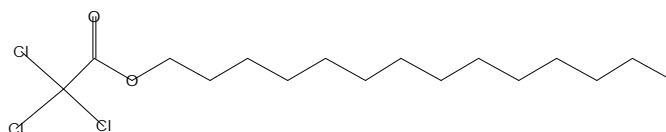

## Hit Spectrum

## Delta

## Compound Structure

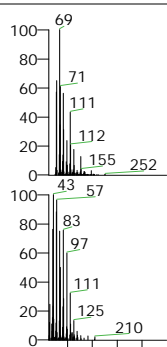

NL: 9.99E2  
 132505 12.52 1 11 22  
 2480-2490 2520-2530  
 7.67E7 + c EI Full ms  
 [50.00-500.00]

NL: 9.99E2  
 SI 881, RSI 920, mainlib,  
 Entry# 7360, CAS#  
 74339-53-0,  
 Trichloroacetic acid,  
 pentadecyl ester

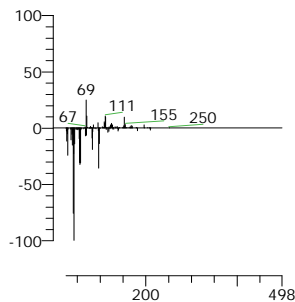

Trichloroacetic acid, pentadecyl ester  
 Formula C17H31Cl3O2, MW 372, CAS# 74339-53-0, Entry# 7360  
 Pentadecyl trichloroacetate #

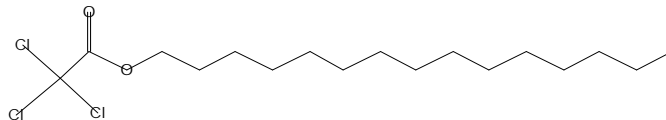

| RT    | Compound Name                         | Area       | Area % | RSI | Cas #      | Library |
|-------|---------------------------------------|------------|--------|-----|------------|---------|
| 12.52 | 1-Dodecanol, 3,7,11-trimethyl-        | 1679379289 | 1.11   | 936 | 6750-34-1  | mainlib |
| 12.52 | Trichloroacetic acid, hexadecyl ester | 1679379289 | 1.11   | 930 | 74339-54-1 | mainlib |
| 12.52 | 1-Decanol, 2-hexyl-                   | 1679379289 | 1.11   | 926 | 2425-77-6  | mainlib |

Analysed By:

Checked By:

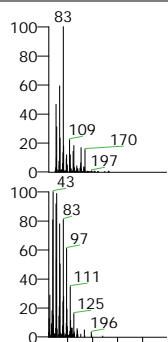

NL: 9.98E2  
132559 12.70 1 11 22  
2534-2544 2574-2584  
1.04E8 + c EI Full ms  
[50.00-500.00]

NL: 9.99E2  
SI 732, RSI 857, mainlib,  
Entry# 7359, CAS#  
74339-52-9,  
Trichloroacetic acid,  
tetradecyl ester

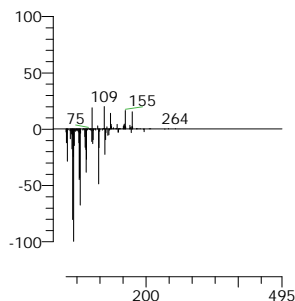

Trichloroacetic acid, tetradecyl ester  
Formula C16H29Cl3O2, MW 358, CAS# 74339-52-9, Entry# 7359  
Tetradecyl trichloroacetate #

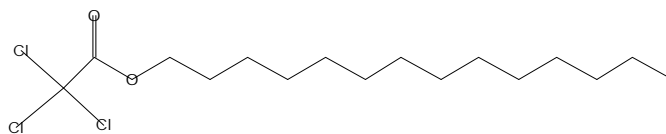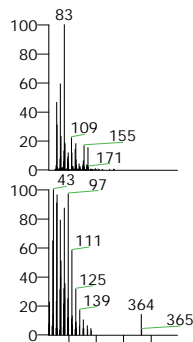

NL: 9.98E2  
132559 12.70 1 11  
22 2534-2544 2574-2584  
1.04E8 + c EI Full ms  
[50.00-500.00]

NL: 9.99E2  
SI 730, RSI 850, mainlib,  
Entry# 9856, CAS#  
71502-22-2,  
9-Hexacosene

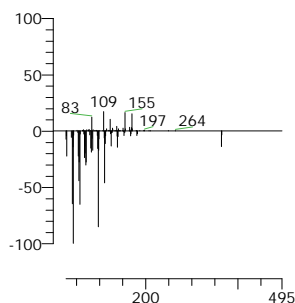

9-Hexacosene  
Formula C26H52, MW 364, CAS# 71502-22-2, Entry# 9856  
(9E)-9-Hexacosene #

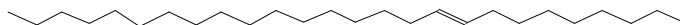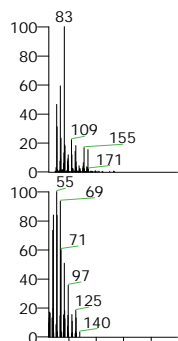

NL: 9.98E2  
132559 12.70 1 11  
22 2534-2544 2574-2584  
1.04E8 + c EI Full ms  
[50.00-500.00]

NL: 9.99E2  
SI 700, RSI 850, mainlib,  
Entry# 18829, CAS#  
6750-34-1, 1-Dodecanol,  
3,7,11-trimethyl-

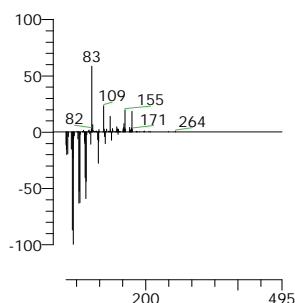

1-Dodecanol, 3,7,11-trimethyl-  
Formula C15H32O, MW 228, CAS# 6750-34-1, Entry# 18829  
Hexa-hydro-farnesol

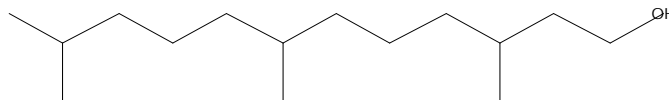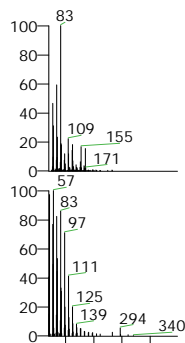

NL: 9.98E2  
132559 12.70 1 11  
22 2534-2544 2574-2584  
1.04E8 + c EI Full ms  
[50.00-500.00]

NL: 9.99E2  
SI 745, RSI 848, mainlib,  
Entry# 22753, CAS#  
77899-03-7,  
1-Heneicosyl formate

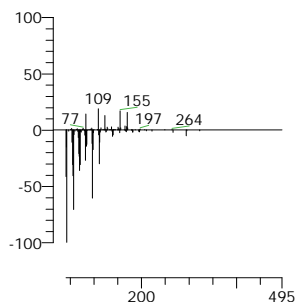

1-Heneicosyl formate  
Formula C22H44O2, MW 340, CAS# 77899-03-7, Entry# 22753  
Henicosyl formate #

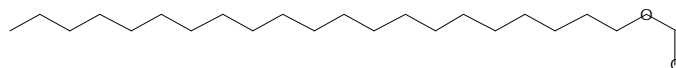

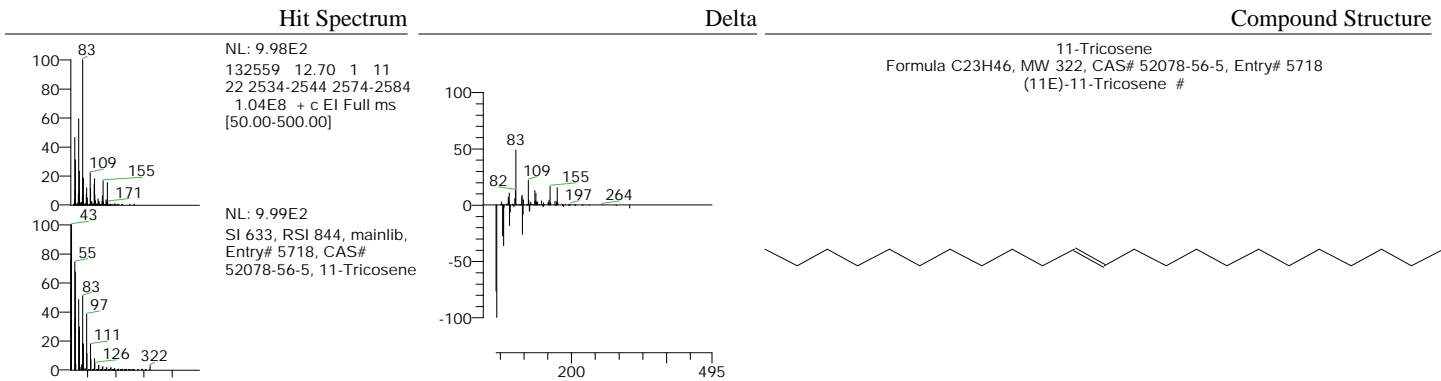

| RT    | Compound Name                          | Area       | Area % | RSI | Cas #      | Library |
|-------|----------------------------------------|------------|--------|-----|------------|---------|
| 12.70 | Trichloroacetic acid, tetradecyl ester | 2146033589 | 1.42   | 857 | 74339-52-9 | mainlib |
| 12.70 | 1-Dodecanol, 3,7,11-trimethyl-         | 2146033589 | 1.42   | 850 | 6750-34-1  | mainlib |
| 12.70 | 9-Hexacosene                           | 2146033589 | 1.42   | 850 | 71502-22-2 | mainlib |

## Hit Spectrum

## Delta

## Compound Structure

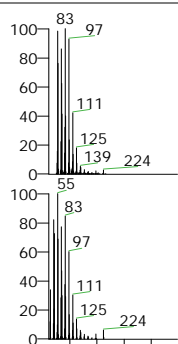

NL: 9.99E2  
132647 13.00 1 11  
22 2622-2632 2662-2672  
1.00E8 + c EI Full ms  
[50.00-500.00]

NL: 9.99E2  
SI 964, RSI 981, mainlib,  
Entry# 19398, CAS#  
295-65-8,  
Cyclohexadecane

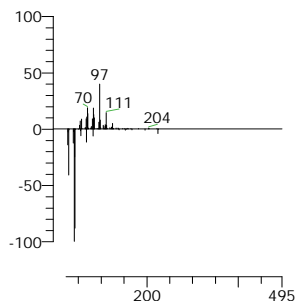

Cyclohexadecane  
Formula C<sub>16</sub>H<sub>32</sub>, MW 224, CAS# 295-65-8, Entry# 19398

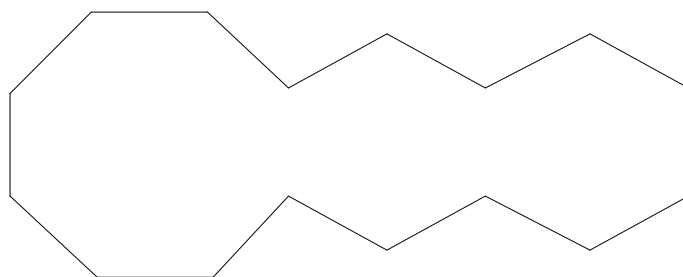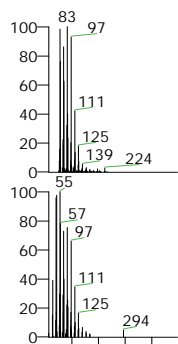

NL: 9.99E2  
132647 13.00 1 11  
22 2622-2632 2662-2672  
1.00E8 + c EI Full ms  
[50.00-500.00]

NL: 9.99E2  
SI 947, RSI 980, mainlib,  
Entry# 18363, CAS#  
95008-11-0,  
10-Heneicosene (c,t)

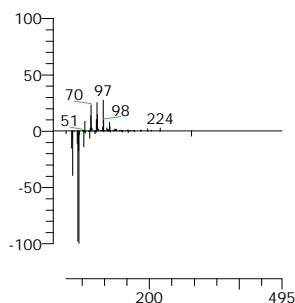

10-Heneicosene (c,t)  
Formula C<sub>21</sub>H<sub>42</sub>, MW 294, CAS# 95008-11-0, Entry# 18363  
(10E)-10-Henicosene #

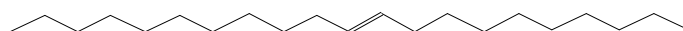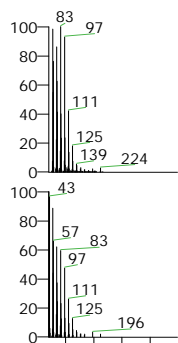

NL: 9.99E2  
132647 13.00 1 11  
22 2622-2632 2662-2672  
1.00E8 + c EI Full ms  
[50.00-500.00]

NL: 9.99E2  
SI 946, RSI 980, mainlib,  
Entry# 2269, CAS#  
64437-47-4,  
Hexadecen-1-ol, trans-9-

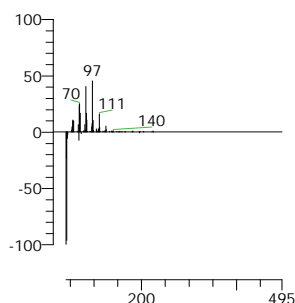

Hexadecen-1-ol, trans-9-  
Formula C<sub>16</sub>H<sub>32</sub>O, MW 240, CAS# 64437-47-4, Entry# 2269  
(9E)-9-Hexadecen-1-ol

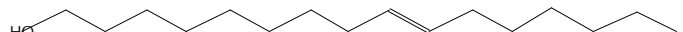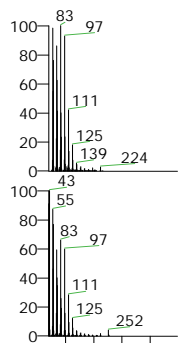

NL: 9.99E2  
132647 13.00 1 11  
22 2622-2632 2662-2672  
1.00E8 + c EI Full ms  
[50.00-500.00]

NL: 9.99E2  
SI 970, RSI 979, mainlib,  
Entry# 5592, CAS# NA,  
E-15-Heptadecenal

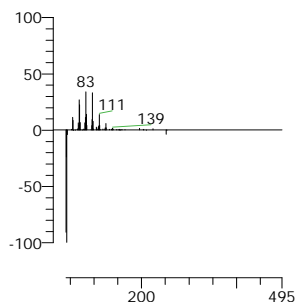

E-15-Heptadecenal  
Formula C<sub>17</sub>H<sub>32</sub>O, MW 252, CAS# NA, Entry# 5592  
(15E)-15-Heptadecenal #

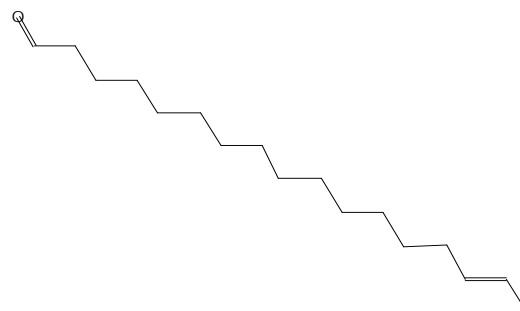

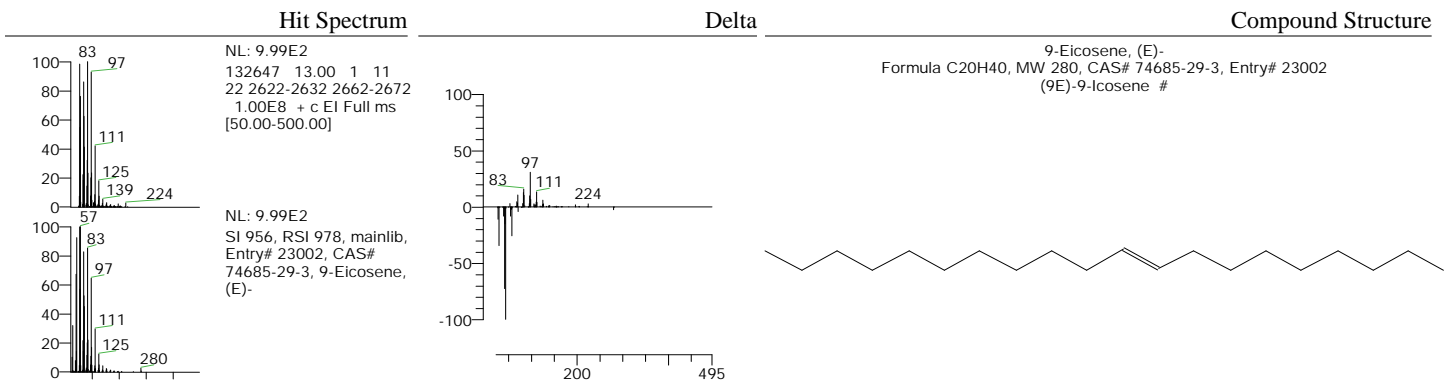

| RT    | Compound Name            | Area       | Area % | RSI | Cas #      | Library |
|-------|--------------------------|------------|--------|-----|------------|---------|
| 13.00 | Cyclohexadecane          | 3622733210 | 2.40   | 981 | 295-65-8   | mainlib |
| 13.00 | Hexadecen-1-ol, trans-9- | 3622733210 | 2.40   | 980 | 64437-47-4 | mainlib |
| 13.00 | 10-Heneicosene (c,t)     | 3622733210 | 2.40   | 980 | 95008-11-0 | mainlib |

Analysed By:

Checked By:

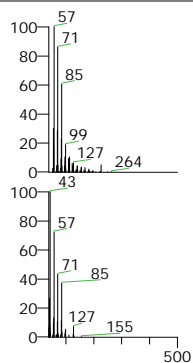

NL: 9.99E2  
132671 13.07 1 11  
22 2646-2656 2686-2696  
2.13E8 + c EI Full ms  
[50.00-500.00]

NL: 9.99E2  
SI 768, RSI 937, mainlib,  
Entry# 7452, CAS#  
62108-27-4, Decane,  
2,4,6-trimethyl-

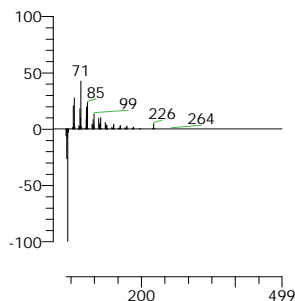

Decane, 2,4,6-trimethyl-  
Formula C<sub>13</sub>H<sub>28</sub>, MW 184, CAS# 62108-27-4, Entry# 7452  
2,4,6-Trimethyldecane #

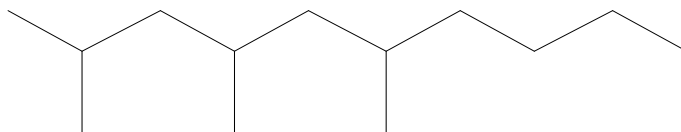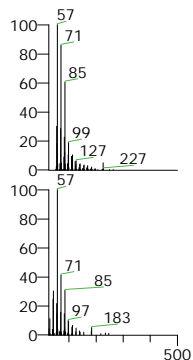

NL: 9.99E2  
132671 13.07 1 11  
22 2646-2656 2686-2696  
2.13E8 + c EI Full ms  
[50.00-500.00]

NL: 9.99E2  
SI 835, RSI 934, mainlib,  
Entry# 23666, CAS# NA,  
Sulfurous acid, butyl  
tridecyl ester

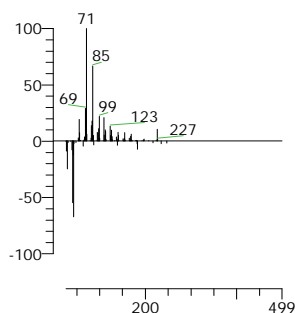

Sulfurous acid, butyl tridecyl ester  
Formula C<sub>17</sub>H<sub>36</sub>O<sub>3</sub>S, MW 320, CAS# NA, Entry# 23666

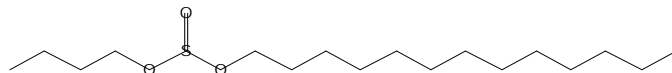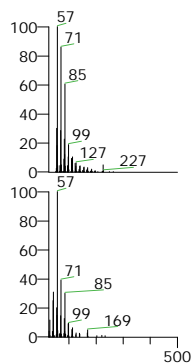

NL: 9.99E2  
132671 13.07 1 11  
22 2646-2656 2686-2696  
2.13E8 + c EI Full ms  
[50.00-500.00]

NL: 9.99E2  
SI 826, RSI 934, mainlib,  
Entry# 23475, CAS# NA,  
Sulfurous acid, butyl  
dodecyl ester

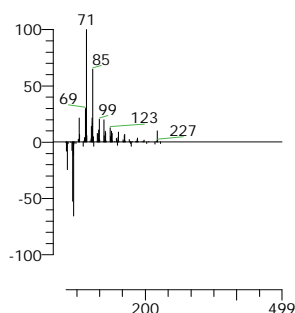

Sulfurous acid, butyl dodecyl ester  
Formula C<sub>16</sub>H<sub>34</sub>O<sub>3</sub>S, MW 306, CAS# NA, Entry# 23475

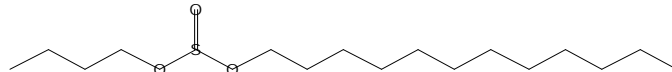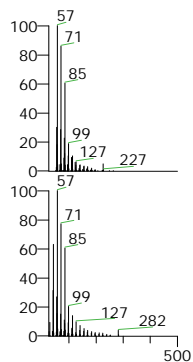

NL: 9.99E2  
132671 13.07 1 11  
22 2646-2656 2686-2696  
2.13E8 + c EI Full ms  
[50.00-500.00]

NL: 9.99E2  
SI 908, RSI 933, mainlib,  
Entry# 23557, CAS#  
112-95-8, Eicosane

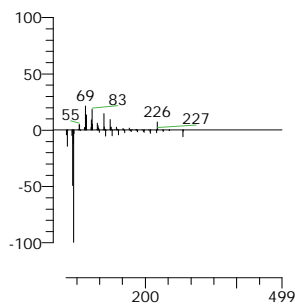

Eicosane  
Formula C<sub>20</sub>H<sub>42</sub>, MW 282, CAS# 112-95-8, Entry# 23557  
n-Eicosane

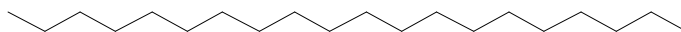



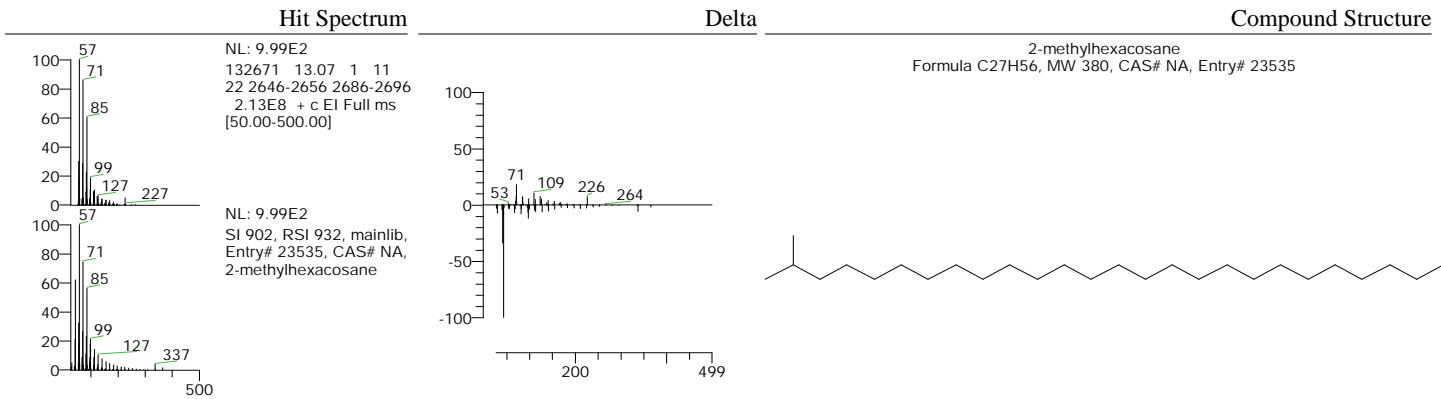

| RT    | Compound Name                        | Area       | Area % | RSI | Cas #      | Library |
|-------|--------------------------------------|------------|--------|-----|------------|---------|
| 13.07 | Decane, 2,4,6-trimethyl-             | 4317767725 | 2.87   | 937 | 62108-27-4 | mainlib |
| 13.07 | Sulfurous acid, butyl dodecyl ester  | 4317767725 | 2.87   | 934 | NA         | mainlib |
| 13.07 | Sulfurous acid, butyl tridecyl ester | 4317767725 | 2.87   | 934 | NA         | mainlib |

## Hit Spectrum

## Delta

## Compound Structure

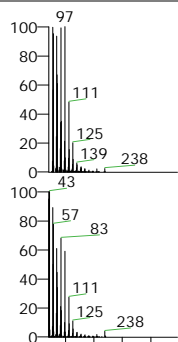

NL: 9.99E2  
132971 14.10 1 11  
22 2946-2956 2986-2996  
7.79E7 + c EI Full ms  
[50.00-500.00]

NL: 9.99E2  
SI 977, RSI 981, mainlib,  
Entry# 5664, CAS#  
330207-53-9,  
E-14-Hexadecenal

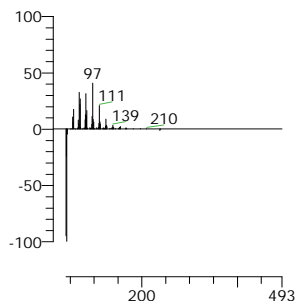

E-14-Hexadecenal  
Formula C<sub>16</sub>H<sub>30</sub>O, MW 238, CAS# 330207-53-9, Entry# 5664  
(14E)-14-Hexadecenal

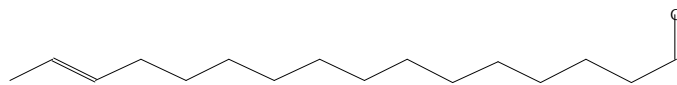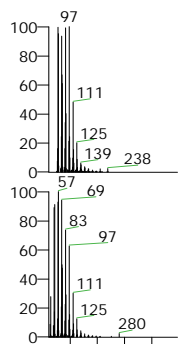

NL: 9.99E2  
132971 14.10 1 11  
22 2946-2956 2986-2996  
7.79E7 + c EI Full ms  
[50.00-500.00]

NL: 9.99E2  
SI 966, RSI 981, mainlib,  
Entry# 23390, CAS#  
74685-33-9, 3-Eicosene,  
(E)-

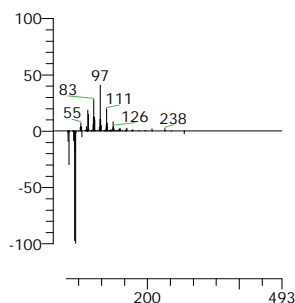

3-Eicosene, (E)-  
Formula C<sub>20</sub>H<sub>40</sub>, MW 280, CAS# 74685-33-9, Entry# 23390  
(3E)-3-Icosene #

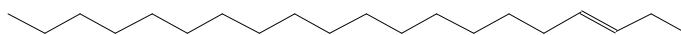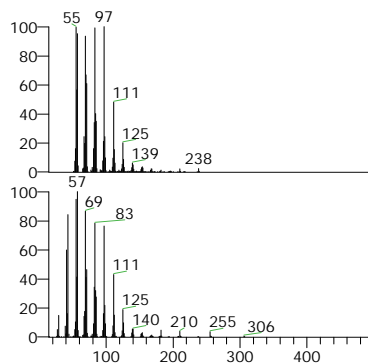

NL: 9.99E2  
132971 14.10 1 11  
22 2946-2956 2986-2996  
7.79E7 + c EI Full ms  
[50.00-500.00]

NL: 9.99E2  
SI 941, RSI 980, mainlib,  
Entry# 18363, CAS#  
95008-11-0,  
10-Heneicosene (c,t)

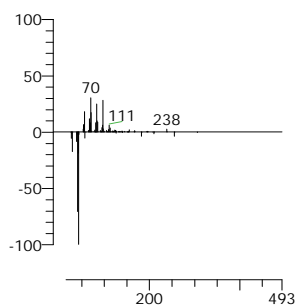

Trifluoroacetic acid, pentadecyl ester  
Formula C<sub>17</sub>H<sub>31</sub>F<sub>3</sub>O<sub>2</sub>, MW 324, CAS# 959010-23-2, Entry# 23039

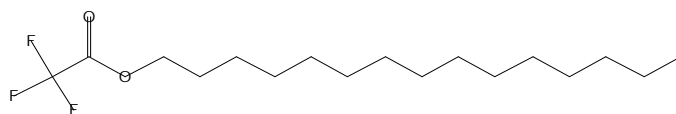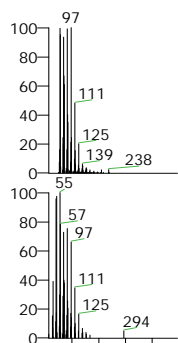

NL: 9.99E2  
132971 14.10 1 11  
22 2946-2956 2986-2996  
7.79E7 + c EI Full ms  
[50.00-500.00]

NL: 9.99E2  
SI 941, RSI 980, mainlib,  
Entry# 18363, CAS#  
95008-11-0,  
10-Heneicosene (c,t)

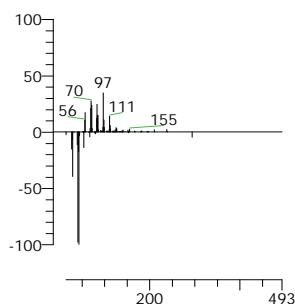

10-Heneicosene (c,t)  
Formula C<sub>21</sub>H<sub>42</sub>, MW 294, CAS# 95008-11-0, Entry# 18363  
(10E)-10-Henicosenes #

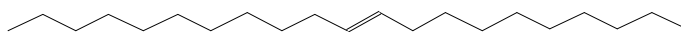

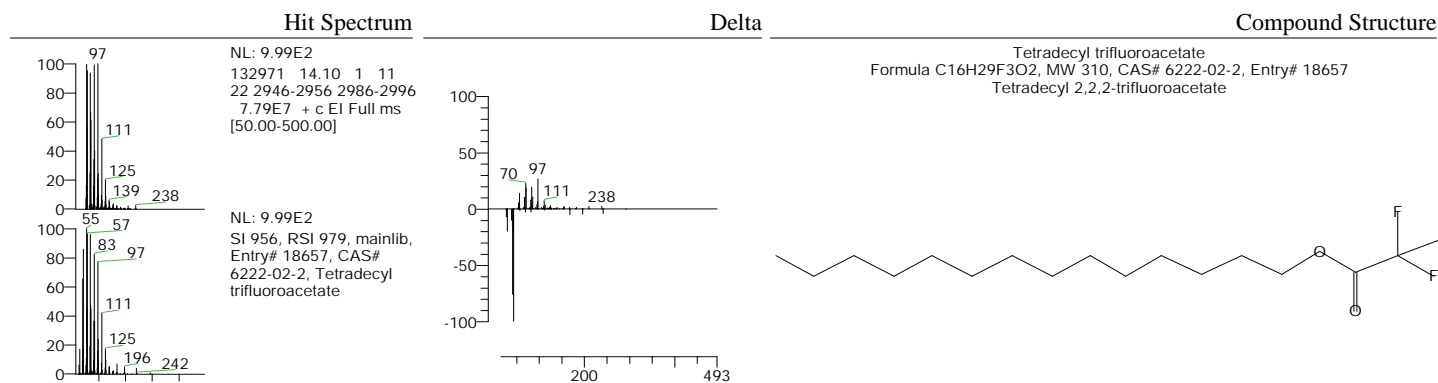

| RT    | Compound Name                          | Area       | Area % | RSI | Cas #       | Library |
|-------|----------------------------------------|------------|--------|-----|-------------|---------|
| 14.10 | 3-Eicosene, (E)-                       | 3560927978 | 2.36   | 981 | 74685-33-9  | mainlib |
| 14.10 | E-14-Hexadecenal                       | 3560927978 | 2.36   | 981 | 330207-53-9 | mainlib |
| 14.10 | Trifluoroacetic acid, pentadecyl ester | 3560927978 | 2.36   | 980 | 959010-23-2 | mainlib |

Analysed By:

Checked By:

## Hit Spectrum

## Delta

## Compound Structure

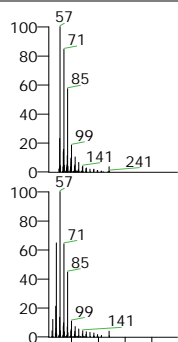

NL: 9.99E2  
132993 14.17 1 11  
22 2968-2978 3008-3018  
1.98E8 + c EI Full ms  
[50.00-500.00]

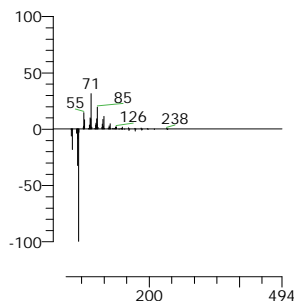

Heptadecane  
Formula C<sub>17</sub>H<sub>36</sub>, MW 240, CAS# 629-78-7, Entry# 22556  
n-Heptadecane

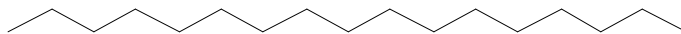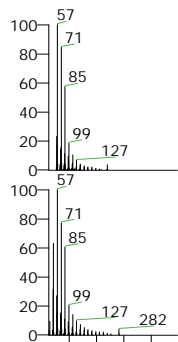

NL: 9.99E2  
132993 14.17 1 11  
22 2968-2978 3008-3018  
1.98E8 + c EI Full ms  
[50.00-500.00]

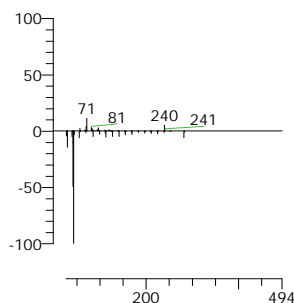

Eicosane  
Formula C<sub>20</sub>H<sub>42</sub>, MW 282, CAS# 112-95-8, Entry# 23557  
n-Eicosane

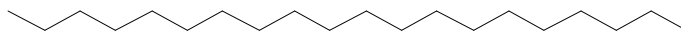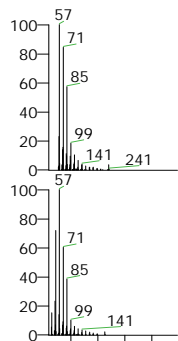

NL: 9.99E2  
132993 14.17 1 11  
22 2968-2978 3008-3018  
1.98E8 + c EI Full ms  
[50.00-500.00]

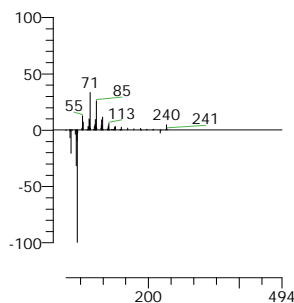

Hexadecane  
Formula C<sub>16</sub>H<sub>34</sub>, MW 226, CAS# 544-76-3, Entry# 22719  
n-Cetane

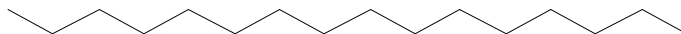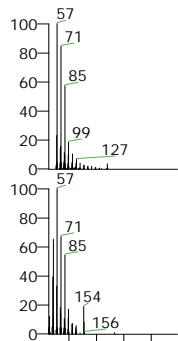

NL: 9.99E2  
132993 14.17 1 11  
22 2968-2978 3008-3018  
1.98E8 + c EI Full ms  
[50.00-500.00]

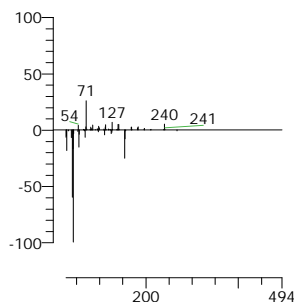

10-Methylnonadecane  
Formula C<sub>20</sub>H<sub>42</sub>, MW 282, CAS# 56862-62-5, Entry# 23599  
Nonadecane, 10-methyl

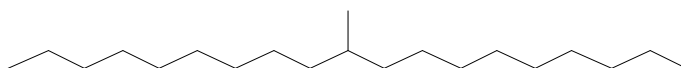

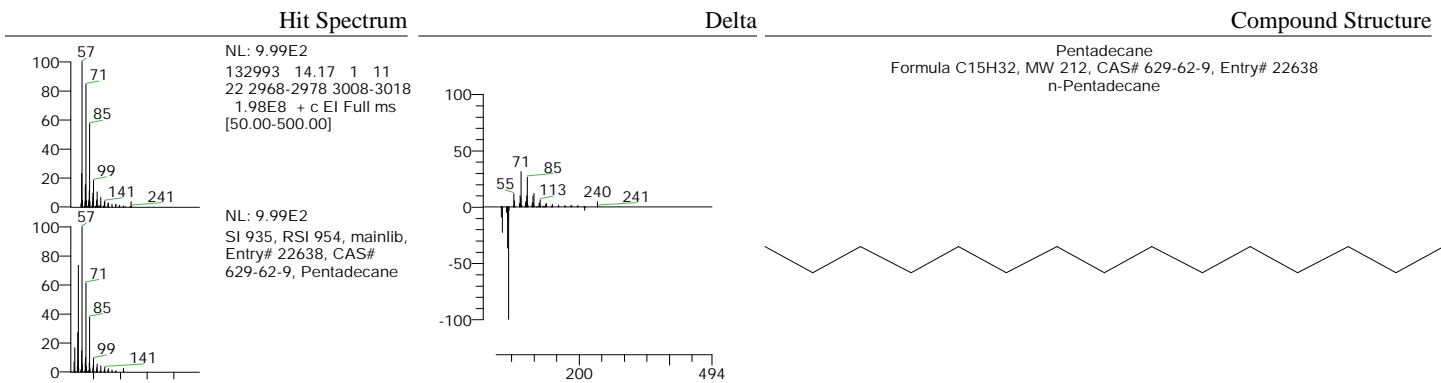

| RT    | Compound Name | Area       | Area % | RSI | Cas #    | Library |
|-------|---------------|------------|--------|-----|----------|---------|
| 14.17 | Heptadecane   | 3108859932 | 2.06   | 970 | 629-78-7 | mainlib |
| 14.17 | Hexadecane    | 3108859932 | 2.06   | 962 | 544-76-3 | mainlib |
| 14.17 | Eicosane      | 3108859932 | 2.06   | 962 | 112-95-8 | mainlib |

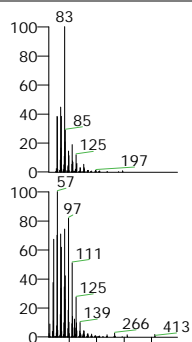

NL: 9.99E2  
133020 14.27 1 11  
22 2995-3005 3035-3045  
7.71E7 + c EI Full ms  
[50.00-500.00]

NL: 9.99E2  
SI 888, RSI 892, mainlib,  
Entry# 24210, CAS# NA,  
Nonadecyl  
pentafluoropropionate

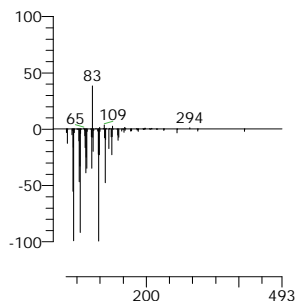

Nonadecyl pentafluoropropionate  
Formula C22H39F5O2, MW 430, CAS# NA, Entry# 24210  
Nonadecyl 2,2,3,3,3-pentafluoropropanoate

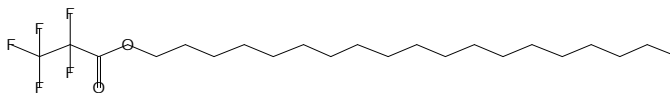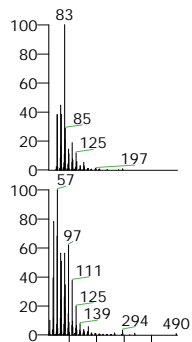

NL: 9.99E2  
133020 14.27 1 11  
22 2995-3005 3035-3045  
7.71E7 + c EI Full ms  
[50.00-500.00]

NL: 9.99E2  
SI 887, RSI 891, mainlib,  
Entry# 22443, CAS# NA,  
Heneicosyl  
heptafluorobutyrate

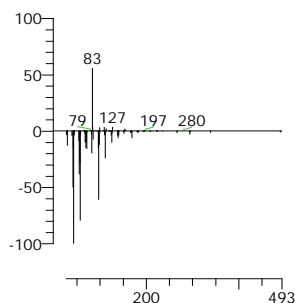

Heneicosyl heptafluorobutyrate  
Formula C25H43F7O2, MW 508, CAS# NA, Entry# 22443  
Heneicosyl 2,2,3,3,4,4,4-heptafluorobutanoate

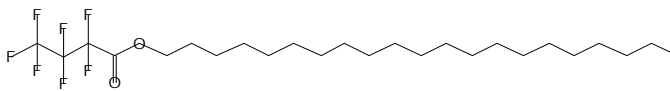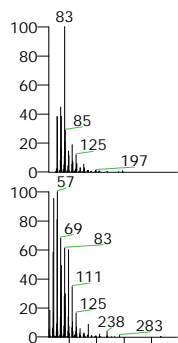

NL: 9.99E2  
133020 14.27 1 11  
22 2995-3005 3035-3045  
7.71E7 + c EI Full ms  
[50.00-500.00]

NL: 9.99E2  
SI 883, RSI 891, mainlib,  
Entry# 22456, CAS#  
959085-66-6, Heptadecyl  
heptafluorobutyrate

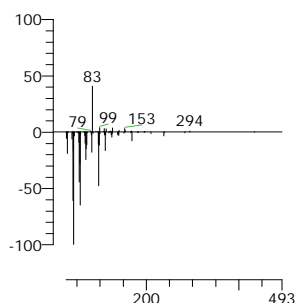

Heptadecyl heptafluorobutyrate  
Formula C21H35F7O2, MW 452, CAS# 959085-66-6, Entry# 22456  
Heptadecyl 2,2,3,3,4,4,4-heptafluorobutanoate

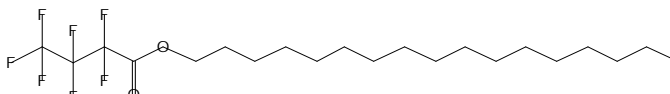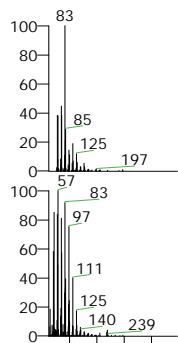

NL: 9.99E2  
133020 14.27 1 11  
22 2995-3005 3035-3045  
7.71E7 + c EI Full ms  
[50.00-500.00]

NL: 9.99E2  
SI 884, RSI 889, mainlib,  
Entry# 23863, CAS# NA,  
Dichloroacetic acid,  
heptadecyl ester

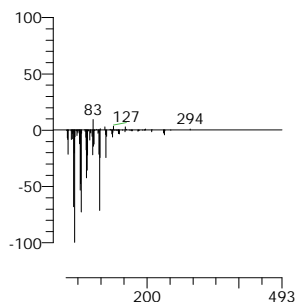

Dichloroacetic acid, heptadecyl ester  
Formula C19H36Cl2O2, MW 366, CAS# NA, Entry# 23863  
Heptadecyl dichloroacetate #

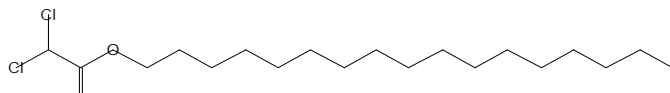

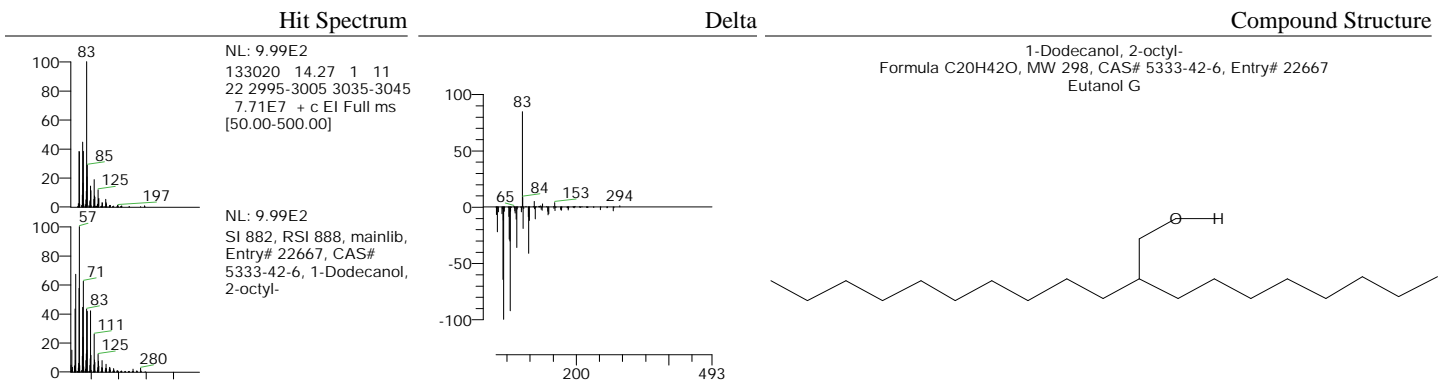

| RT    | Compound Name                   | Area       | Area % | RSI | Cas #       | Library |
|-------|---------------------------------|------------|--------|-----|-------------|---------|
| 14.27 | Nonadecyl pentafluoropropionate | 1518131799 | 1.01   | 892 | NA          | mainlib |
| 14.27 | Heptadecyl heptafluorobutyrate  | 1518131799 | 1.01   | 891 | 959085-66-6 | mainlib |
| 14.27 | Heneicosyl heptafluorobutyrate  | 1518131799 | 1.01   | 891 | NA          | mainlib |

## Hit Spectrum

## Delta

## Compound Structure

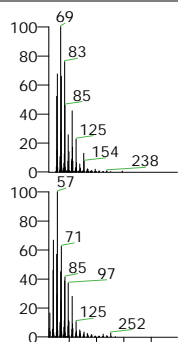

NL: 9.99E2  
133120 14.61 1 11  
22 3095-3105 3135-3145  
1.10E8 + c EI Full ms  
[50.00-500.00]

NL: 9.99E2  
SI 920, RSI 924, mainlib,  
Entry# 22630, CAS#  
110225-00-8,  
1-Dodecanol, 2-hexyl-

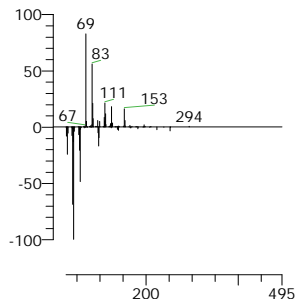

1-Dodecanol, 2-hexyl-  
Formula C<sub>18</sub>H<sub>38</sub>O, MW 270, CAS# 110225-00-8, Entry# 22630  
2-Hexyldodecan-1-ol

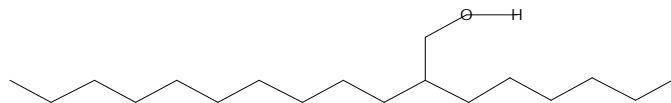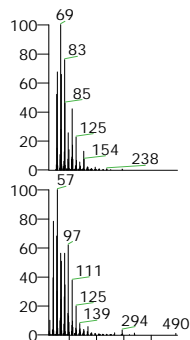

NL: 9.99E2  
133120 14.61 1 11  
22 3095-3105 3135-3145  
1.10E8 + c EI Full ms  
[50.00-500.00]

NL: 9.99E2  
SI 917, RSI 920, mainlib,  
Entry# 22443, CAS# NA,  
Heneicosyl  
heptafluorobutyrate

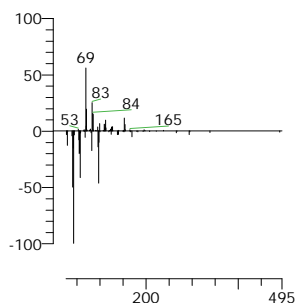

Heneicosyl heptafluorobutyrate  
Formula C<sub>25</sub>H<sub>43</sub>F<sub>7</sub>O<sub>2</sub>, MW 508, CAS# NA, Entry# 22443  
Heneicosyl 2,2,3,3,4,4,4-heptafluorobutanoate

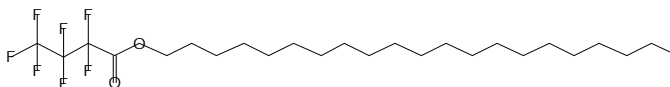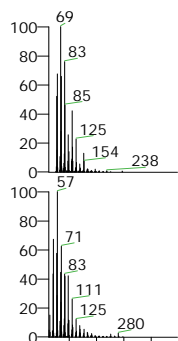

NL: 9.99E2  
133120 14.61 1 11  
22 3095-3105 3135-3145  
1.10E8 + c EI Full ms  
[50.00-500.00]

NL: 9.99E2  
SI 916, RSI 919, mainlib,  
Entry# 22667, CAS#  
5333-42-6, 1-Dodecanol,  
2-octyl-

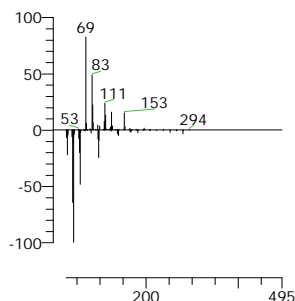

1-Dodecanol, 2-octyl-  
Formula C<sub>20</sub>H<sub>42</sub>O, MW 298, CAS# 5333-42-6, Entry# 22667  
Eutanol G

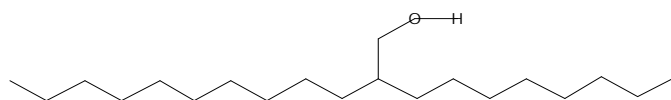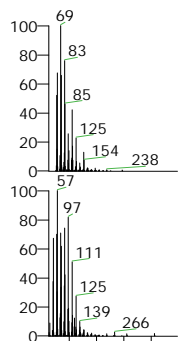

NL: 9.99E2  
133120 14.61 1 11  
22 3095-3105 3135-3145  
1.10E8 + c EI Full ms  
[50.00-500.00]

NL: 9.99E2  
SI 915, RSI 919, mainlib,  
Entry# 24210, CAS# NA,  
Nonadecyl  
pentafluoropropionate

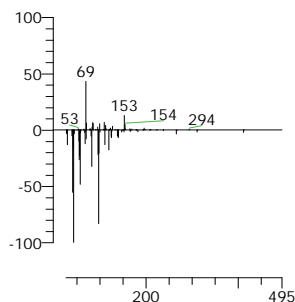

Nonadecyl pentafluoropropionate  
Formula C<sub>22</sub>H<sub>39</sub>F<sub>5</sub>O<sub>2</sub>, MW 430, CAS# NA, Entry# 24210  
Nonadecyl 2,2,3,3,3-pentafluoropropanoate

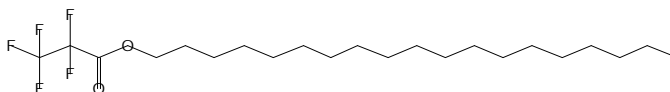



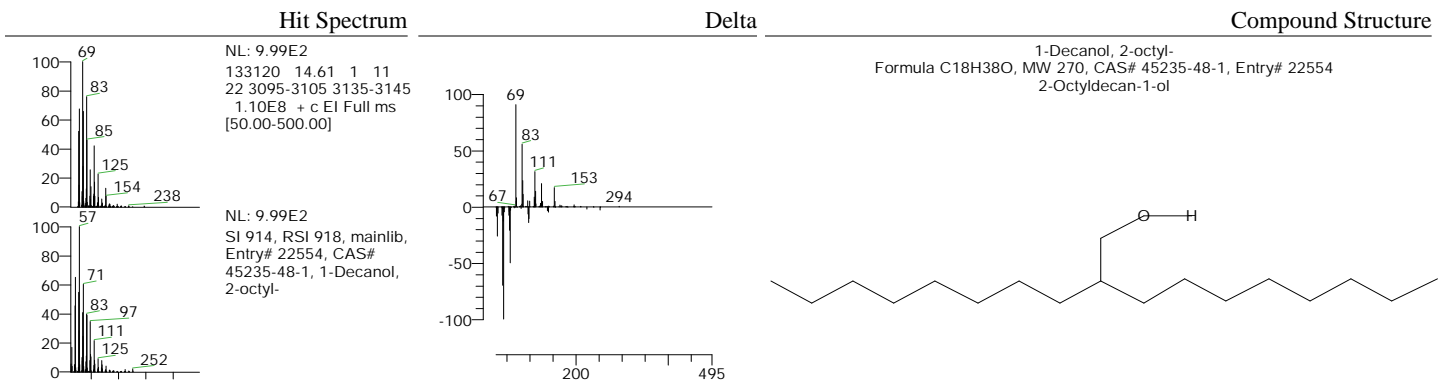

| RT    | Compound Name                  | Area       | Area % | RSI | Cas #       | Library |
|-------|--------------------------------|------------|--------|-----|-------------|---------|
| 14.61 | 1-Dodecanol, 2-hexyl-          | 2131474151 | 1.41   | 924 | 110225-00-8 | mainlib |
| 14.61 | Heneicosyl heptafluorobutyrate | 2131474151 | 1.41   | 920 | NA          | mainlib |
| 14.61 | 1-Dodecanol, 2-octyl-          | 2131474151 | 1.41   | 919 | 5333-42-6   | mainlib |

Analysed By:

Checked By:

## Hit Spectrum

## Delta

## Compound Structure

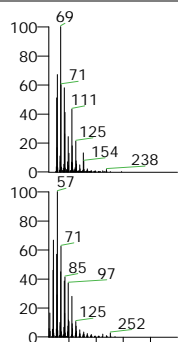

NL: 9.99E2  
133203 14.89 1 11  
22 3178-3188 3218-3228  
8.33E7 + c EI Full ms  
[50.00-500.00]

NL: 9.99E2  
SI 919, RSI 933, mainlib,  
Entry# 22630, CAS#  
110225-00-8,  
1-Dodecanol, 2-hexyl-

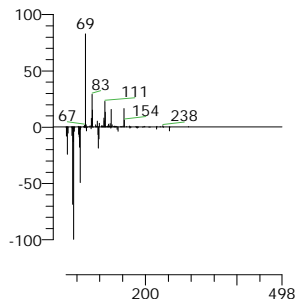

1-Dodecanol, 2-hexyl-  
Formula C<sub>18</sub>H<sub>38</sub>O, MW 270, CAS# 110225-00-8, Entry# 22630  
2-Hexyldodecan-1-ol

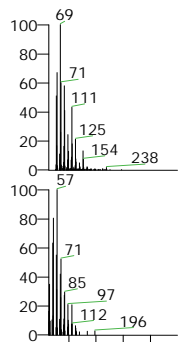

NL: 9.99E2  
133203 14.89 1 11  
22 3178-3188 3218-3228  
8.33E7 + c EI Full ms  
[50.00-500.00]

NL: 9.99E2  
SI 840, RSI 931, mainlib,  
Entry# 22406, CAS#  
19780-79-1,  
2-Hexyl-1-octanol

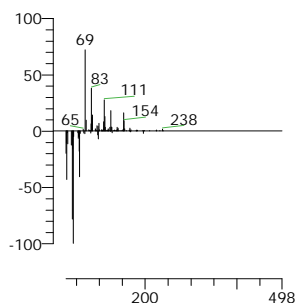

2-Hexyl-1-octanol  
Formula C<sub>14</sub>H<sub>30</sub>O, MW 214, CAS# 19780-79-1, Entry# 22406

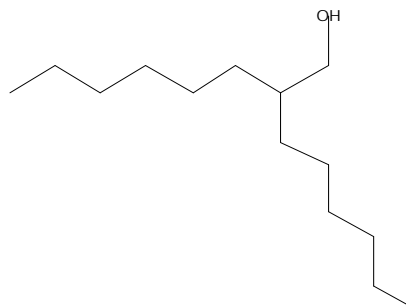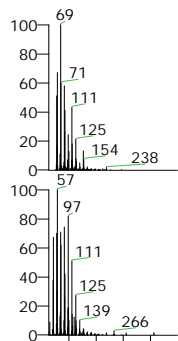

NL: 9.99E2  
133203 14.89 1 11  
22 3178-3188 3218-3228  
8.33E7 + c EI Full ms  
[50.00-500.00]

NL: 9.99E2  
SI 910, RSI 925, mainlib,  
Entry# 24210, CAS# NA,  
Nonadecyl  
pentafluoropropionate

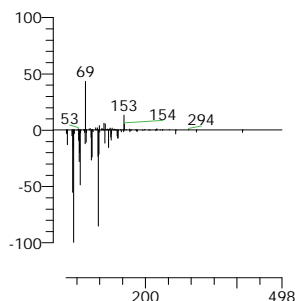

Nonadecyl pentafluoropropionate  
Formula C<sub>22</sub>H<sub>39</sub>F<sub>5</sub>O<sub>2</sub>, MW 430, CAS# NA, Entry# 24210  
Nonadecyl 2,2,3,3,3-pentafluoropropanoate

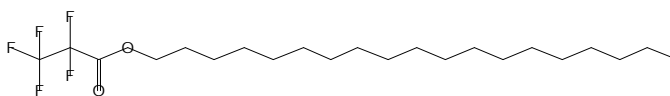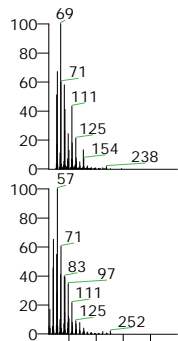

NL: 9.99E2  
133203 14.89 1 11  
22 3178-3188 3218-3228  
8.33E7 + c EI Full ms  
[50.00-500.00]

NL: 9.99E2  
SI 910, RSI 924, mainlib,  
Entry# 22554, CAS#  
45235-48-1, 1-Decanol,  
2-octyl-

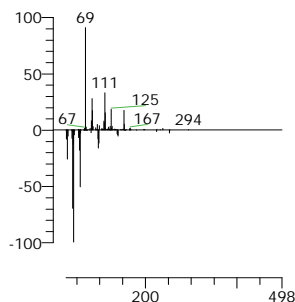

1-Decanol, 2-octyl-  
Formula C<sub>18</sub>H<sub>38</sub>O, MW 270, CAS# 45235-48-1, Entry# 22554  
2-Octyldodecan-1-ol

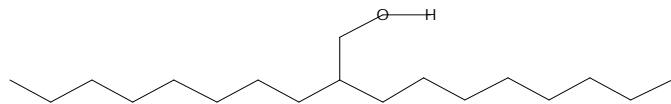

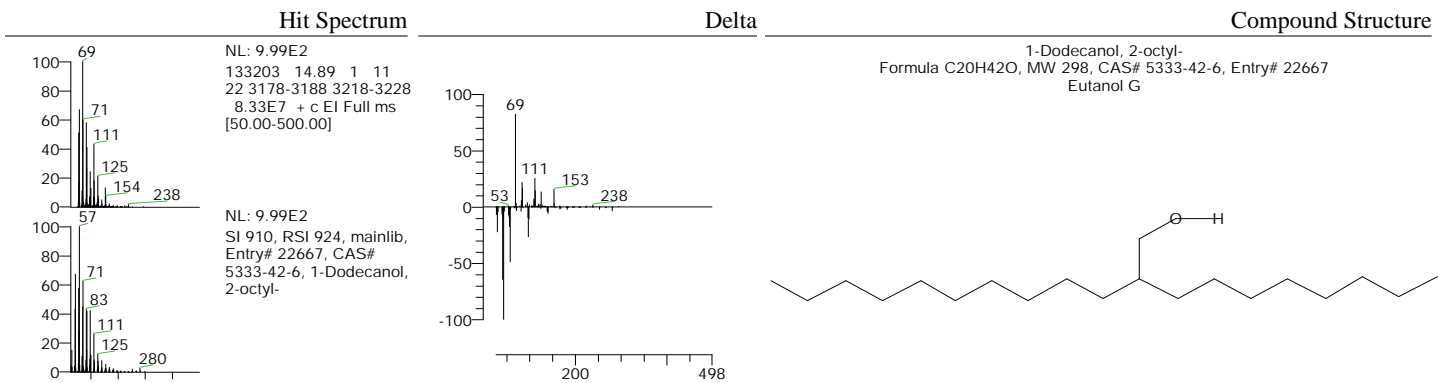

| RT    | Compound Name                   | Area       | Area % | RSI | Cas #       | Library |
|-------|---------------------------------|------------|--------|-----|-------------|---------|
| 14.89 | 1-Dodecanol, 2-hexyl-           | 1517211604 | 1.01   | 933 | 110225-00-8 | mainlib |
| 14.89 | 2-Hexyl-1-octanol               | 1517211604 | 1.01   | 931 | 19780-79-1  | mainlib |
| 14.89 | Nonadecyl pentafluoropropionate | 1517211604 | 1.01   | 925 | NA          | mainlib |

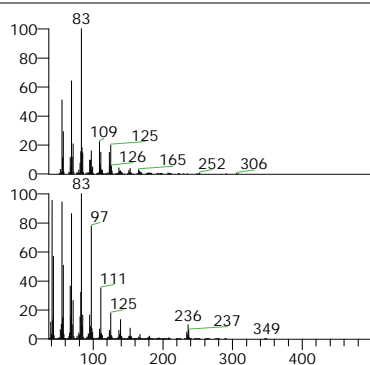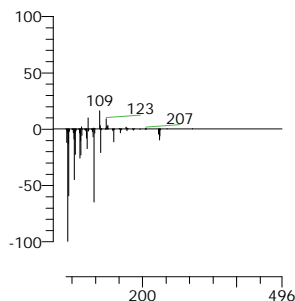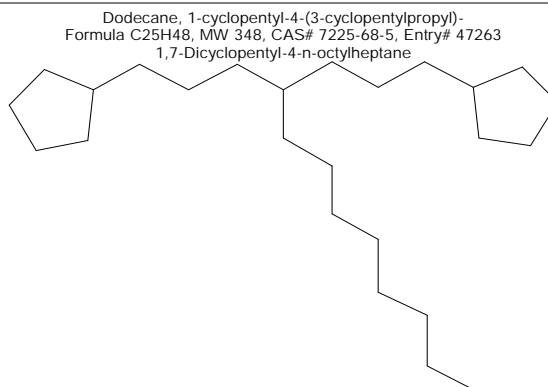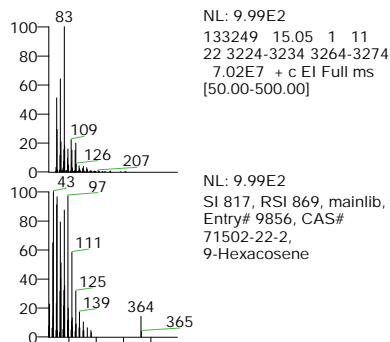

NL: 9.99E2  
133249 15.05 1 11  
22 3224-3234 3264-3274  
7.02E7 + c EI Full ms  
[50.00-500.00]

NL: 9.99E2  
SI 817, RSI 869, mainlib,  
Entry# 9856, CAS#  
71502-22-2,  
9-Hexacosene

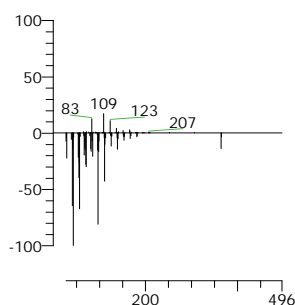

9-Hexacosene  
Formula C<sub>26</sub>H<sub>52</sub>, MW 364, CAS# 71502-22-2, Entry# 9856  
(9E)-9-Hexacosene #

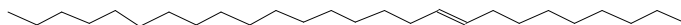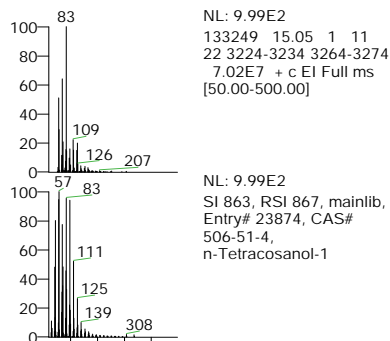

NL: 9.99E2  
133249 15.05 1 11  
22 3224-3234 3264-3274  
7.02E7 + c EI Full ms  
[50.00-500.00]

NL: 9.99E2  
SI 863, RSI 867, mainlib,  
Entry# 23874, CAS#  
506-51-4,  
n-Tetracosanol-1

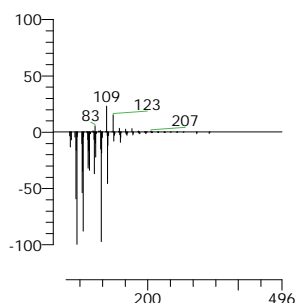

n-Tetracosanol-1  
Formula C<sub>24</sub>H<sub>50</sub>O, MW 354, CAS# 506-51-4, Entry# 23874  
Lignoceric alcohol

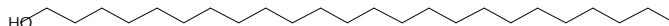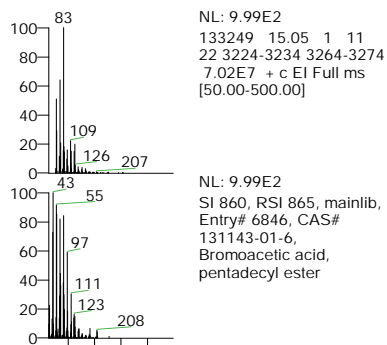

NL: 9.99E2  
133249 15.05 1 11  
22 3224-3234 3264-3274  
7.02E7 + c EI Full ms  
[50.00-500.00]

NL: 9.99E2  
SI 860, RSI 865, mainlib,  
Entry# 6846, CAS#  
131143-01-6,  
Bromoacetic acid,  
pentadecyl ester

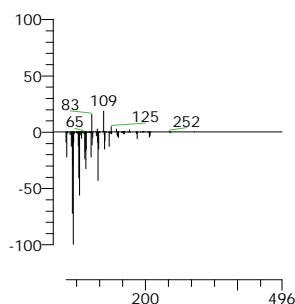

Bromoacetic acid, pentadecyl ester  
Formula C<sub>17</sub>H<sub>33</sub>BrO<sub>2</sub>, MW 348, CAS# 131143-01-6, Entry# 6846  
Pentadecyl bromoacetate #

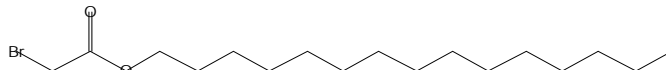

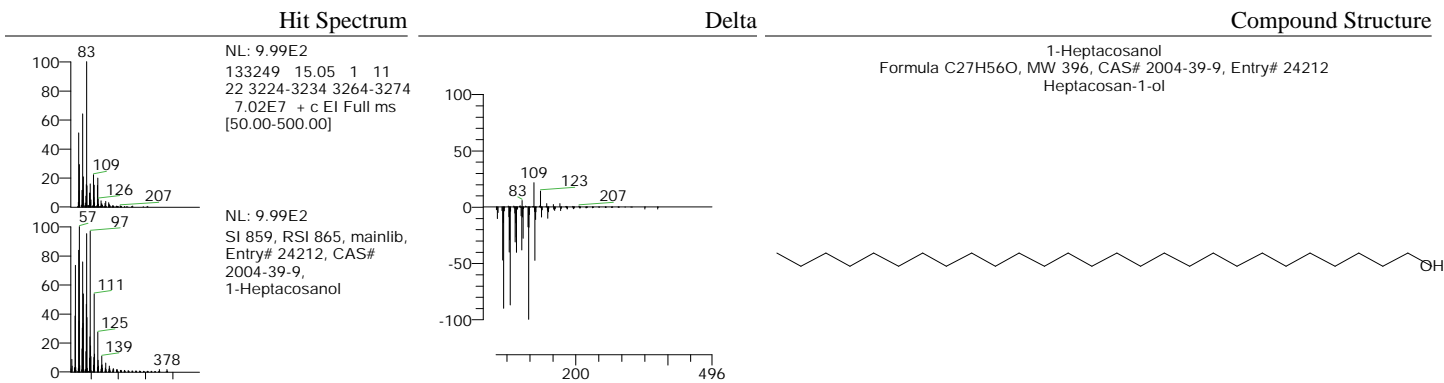

| RT    | Compound Name                                    | Area      | Area % | RSI | Cas #      | Library |
|-------|--------------------------------------------------|-----------|--------|-----|------------|---------|
| 15.05 | Dodecane, 1-cyclopentyl-4-(3-cyclopentylpropyl)- | 874079911 | 0.58   | 882 | 7225-68-5  | mainlib |
| 15.05 | 9-Hexacosene                                     | 874079911 | 0.58   | 869 | 71502-22-2 | mainlib |
| 15.05 | n-Tetracosanol-1                                 | 874079911 | 0.58   | 867 | 506-51-4   | mainlib |

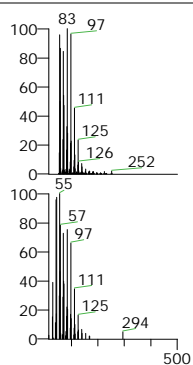

NL: 9.99E2  
133280 15.15 1 11  
22 3255-3265 3295-3305  
7.02E7 + c EI Full ms  
[50.00-500.00]

NL: 9.99E2  
SI 926, RSI 982, mainlib,  
Entry# 18363, CAS#  
95008-11-0,  
10-Heneicosene (c,t)

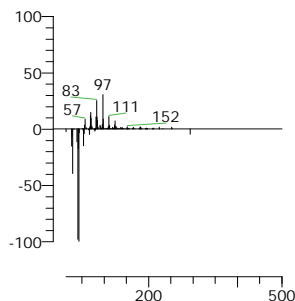

10-Heneicosene (c,t)  
Formula C<sub>21</sub>H<sub>42</sub>, MW 294, CAS# 95008-11-0, Entry# 18363  
(10E)-10-Henicosenene #

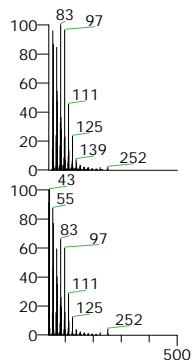

NL: 9.99E2  
133280 15.15 1 11  
22 3255-3265 3295-3305  
7.02E7 + c EI Full ms  
[50.00-500.00]

NL: 9.99E2  
SI 968, RSI 980, mainlib,  
Entry# 5592, CAS# NA,  
E-15-Heptadecenal

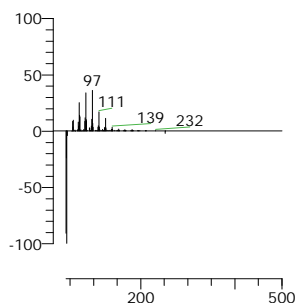

E-15-Heptadecenal  
Formula C<sub>17</sub>H<sub>32</sub>O, MW 252, CAS# NA, Entry# 5592  
(15E)-15-Heptadecenal #

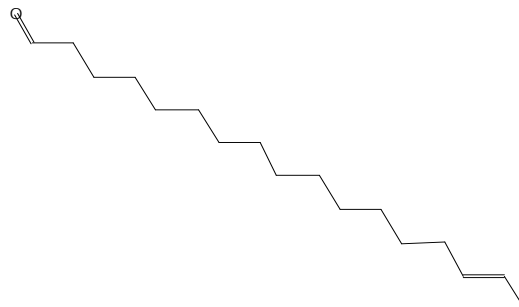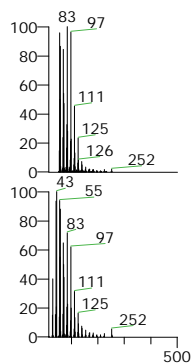

NL: 9.99E2  
133280 15.15 1 11  
22 3255-3265 3295-3305  
7.02E7 + c EI Full ms  
[50.00-500.00]

NL: 9.99E2  
SI 956, RSI 978, mainlib,  
Entry# 6808, CAS#  
112-88-9, 1-Octadecene

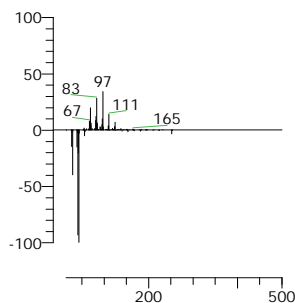

1-Octadecene  
Formula C<sub>18</sub>H<sub>36</sub>, MW 252, CAS# 112-88-9, Entry# 6808  
à-Octadecene

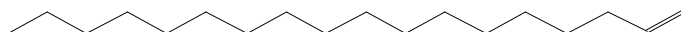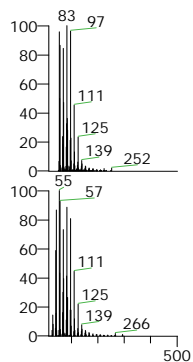

NL: 9.99E2  
133280 15.15 1 11  
22 3255-3265 3295-3305  
7.02E7 + c EI Full ms  
[50.00-500.00]

NL: 9.99E2  
SI 954, RSI 977, mainlib,  
Entry# 18669, CAS#  
15594-90-8,  
1-Henicosan-1-ol

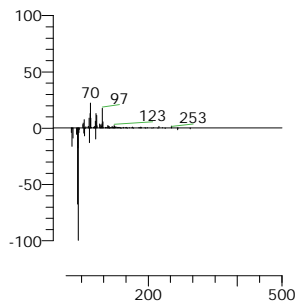

1-Henicosan-1-ol  
Formula C<sub>21</sub>H<sub>44</sub>O, MW 312, CAS# 15594-90-8, Entry# 18669  
Henicosan-1-ol

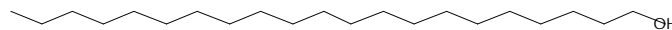

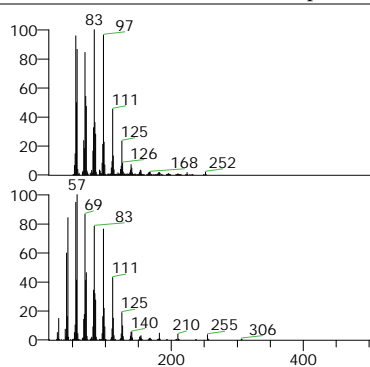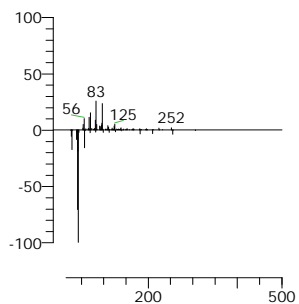

Trifluoroacetic acid, pentadecyl ester  
Formula C<sub>17</sub>H<sub>31</sub>F<sub>3</sub>O<sub>2</sub>, MW 324, CAS# 959010-23-2, Entry# 23039

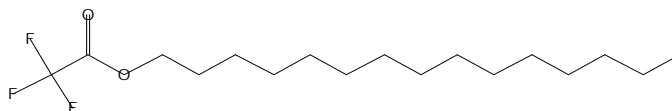

| RT    | Compound Name        | Area       | Area % | RSI | Cas #      | Library |
|-------|----------------------|------------|--------|-----|------------|---------|
| 15.15 | 10-Heneicosene (c,t) | 2409972010 | 1.60   | 982 | 95008-11-0 | mainlib |
| 15.15 | E-15-Heptadecenal    | 2409972010 | 1.60   | 980 | NA         | mainlib |
| 15.15 | 1-Octadecene         | 2409972010 | 1.60   | 978 | 112-88-9   | mainlib |

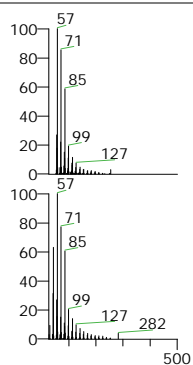

NL: 9.99E2  
133300 15.22 1 11  
22 3275-3285 3315-3325  
1.77E8 + c EI Full ms  
[50.00-500.00]

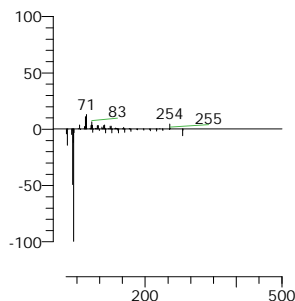

Eicosane  
Formula C<sub>20</sub>H<sub>42</sub>, MW 282, CAS# 112-95-8, Entry# 23557  
n-Eicosane

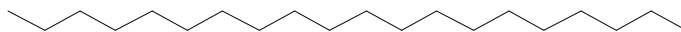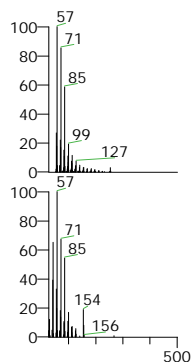

NL: 9.99E2  
133300 15.22 1 11  
22 3275-3285 3315-3325  
1.77E8 + c EI Full ms  
[50.00-500.00]

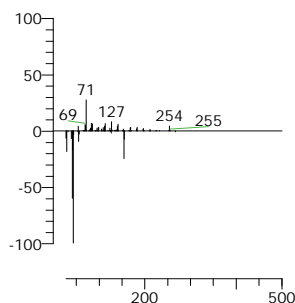

10-Methylnonadecane  
Formula C<sub>20</sub>H<sub>42</sub>, MW 282, CAS# 56862-62-5, Entry# 23599  
Nonadecane, 10-methyl

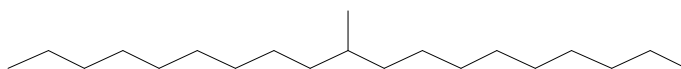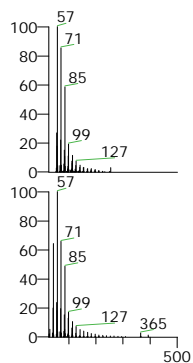

NL: 9.99E2  
133300 15.22 1 11  
22 3275-3285 3315-3325  
1.77E8 + c EI Full ms  
[50.00-500.00]

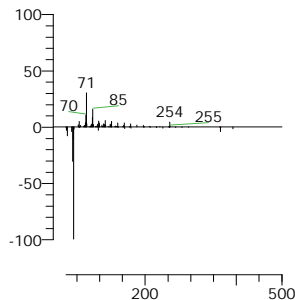

2-methyloctacosane  
Formula C<sub>29</sub>H<sub>60</sub>, MW 408, CAS# NA, Entry# 23536

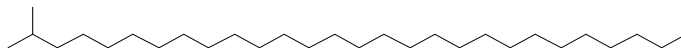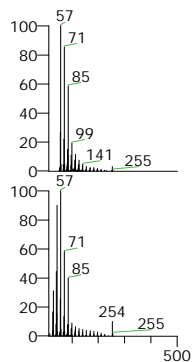

NL: 9.99E2  
133300 15.22 1 11  
22 3275-3285 3315-3325  
1.77E8 + c EI Full ms  
[50.00-500.00]

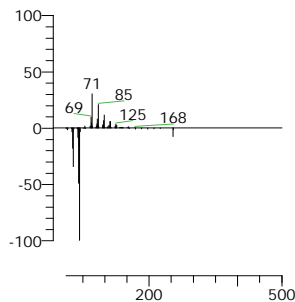

Octadecane  
Formula C<sub>18</sub>H<sub>38</sub>, MW 254, CAS# 593-45-3, Entry# 22577  
n-Octadecane

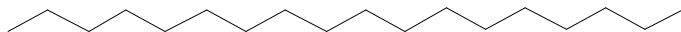



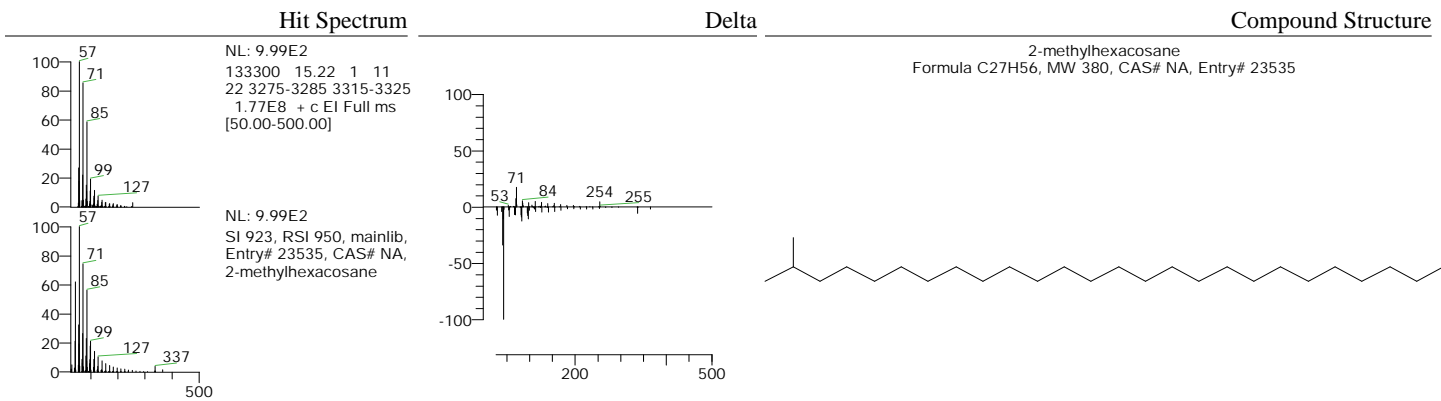

| RT    | Compound Name       | Area       | Area % | RSI | Cas #      | Library |
|-------|---------------------|------------|--------|-----|------------|---------|
| 15.22 | Eicosane            | 3680539172 | 2.44   | 969 | 112-95-8   | mainlib |
| 15.22 | 10-Methylnonadecane | 3680539172 | 2.44   | 962 | 56862-62-5 | mainlib |
| 15.22 | 2-methyloctacosane  | 3680539172 | 2.44   | 955 | NA         | mainlib |

## Hit Spectrum

## Delta

## Compound Structure

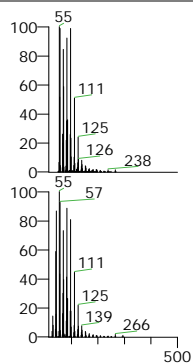

NL: 9.98E2  
133571 16.14 1 11  
22 3546-3556 3586-3596  
4.96E7 + c EI Full ms  
[50.00-500.00]

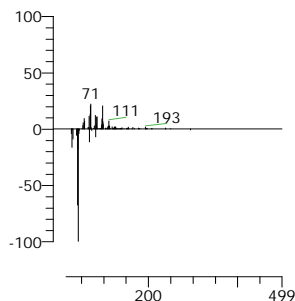

1-Heneicosanol  
Formula C<sub>21</sub>H<sub>44</sub>O, MW 312, CAS# 15594-90-8, Entry# 18669  
Henicosan-1-ol

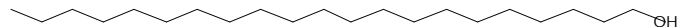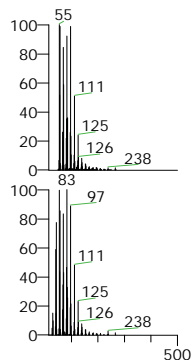

NL: 9.98E2  
133571 16.14 1 11  
22 3546-3556 3586-3596  
4.96E7 + c EI Full ms  
[50.00-500.00]

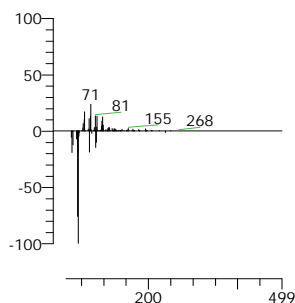

n-Nonadecanol-1  
Formula C<sub>19</sub>H<sub>40</sub>O, MW 284, CAS# 1454-84-8, Entry# 47640  
1-Nonadecanol

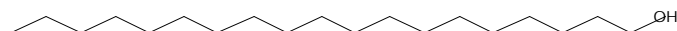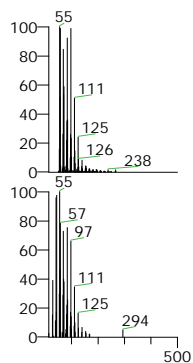

NL: 9.98E2  
133571 16.14 1 11  
22 3546-3556 3586-3596  
4.96E7 + c EI Full ms  
[50.00-500.00]

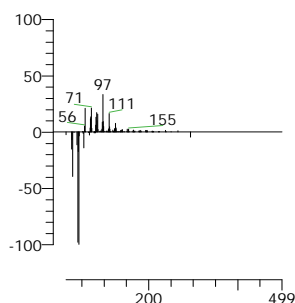

10-Heneicosene (c,t)  
Formula C<sub>21</sub>H<sub>42</sub>, MW 294, CAS# 95008-11-0, Entry# 18363  
(10E)-10-Henicosene #

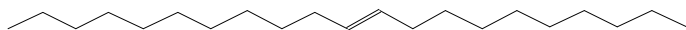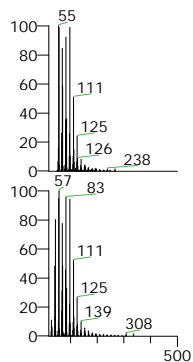

NL: 9.98E2  
133571 16.14 1 11  
22 3546-3556 3586-3596  
4.96E7 + c EI Full ms  
[50.00-500.00]

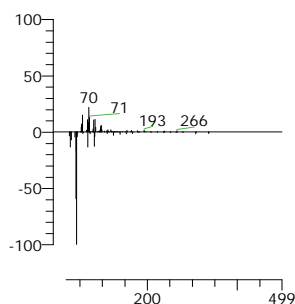

n-Tetracosanol-1  
Formula C<sub>24</sub>H<sub>50</sub>O, MW 354, CAS# 506-51-4, Entry# 23874  
Lignoceric alcohol

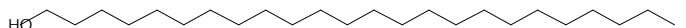

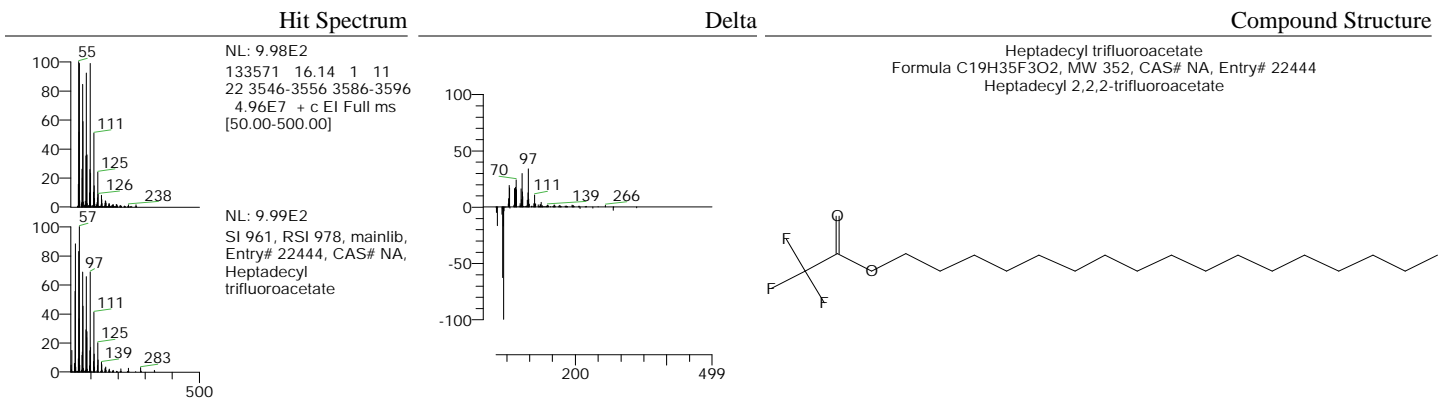

| RT    | Compound Name        | Area       | Area % | RSI | Cas #      | Library |
|-------|----------------------|------------|--------|-----|------------|---------|
| 16.14 | 1-Heneicosanol       | 1539463410 | 1.02   | 984 | 15594-90-8 | mainlib |
| 16.14 | n-Nonadecanol-1      | 1539463410 | 1.02   | 983 | 1454-84-8  | mainlib |
| 16.14 | 10-Heneicosene (c,t) | 1539463410 | 1.02   | 982 | 95008-11-0 | mainlib |

Analysed By:

Checked By:

## Hit Spectrum

## Delta

## Compound Structure

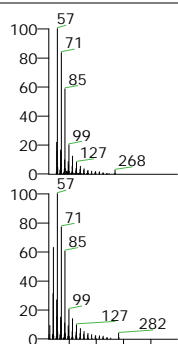

NL: 9.99E2  
133589 16.20 1 11  
22 3564-3574 3604-3614  
1.63E8 + c EI Full ms  
[50.00-500.00]

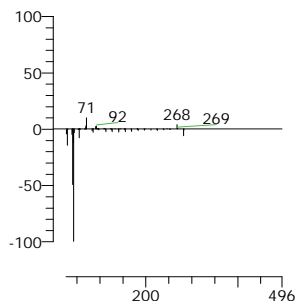

Eicosane  
Formula C<sub>20</sub>H<sub>42</sub>, MW 282, CAS# 112-95-8, Entry# 23557  
n-Eicosane

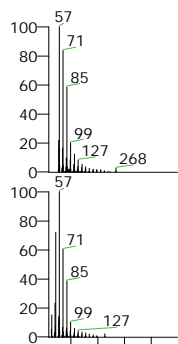

NL: 9.99E2  
133589 16.20 1 11  
22 3564-3574 3604-3614  
1.63E8 + c EI Full ms  
[50.00-500.00]

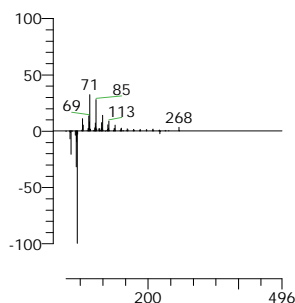

Hexadecane  
Formula C<sub>16</sub>H<sub>34</sub>, MW 226, CAS# 544-76-3, Entry# 22719  
n-Cetane

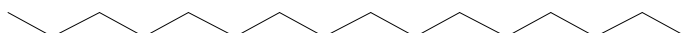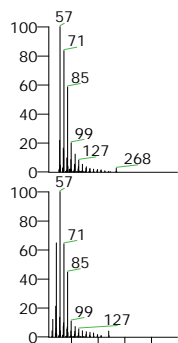

NL: 9.99E2  
133589 16.20 1 11  
22 3564-3574 3604-3614  
1.63E8 + c EI Full ms  
[50.00-500.00]

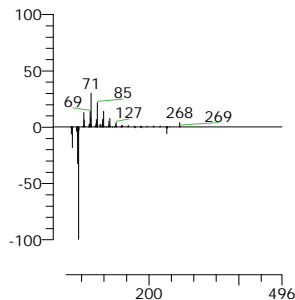

Heptadecane  
Formula C<sub>17</sub>H<sub>36</sub>, MW 240, CAS# 629-78-7, Entry# 22556  
n-Heptadecane

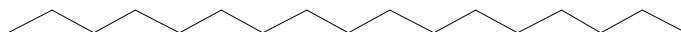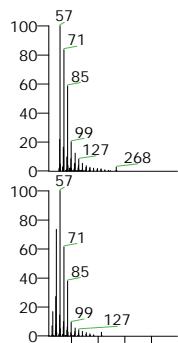

NL: 9.99E2  
133589 16.20 1 11  
22 3564-3574 3604-3614  
1.63E8 + c EI Full ms  
[50.00-500.00]

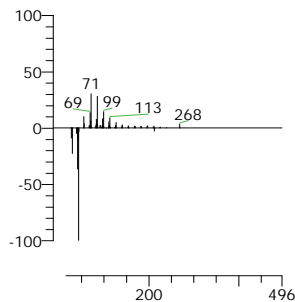

Pentadecane  
Formula C<sub>15</sub>H<sub>32</sub>, MW 212, CAS# 629-62-9, Entry# 22638  
n-Pentadecane

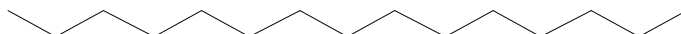

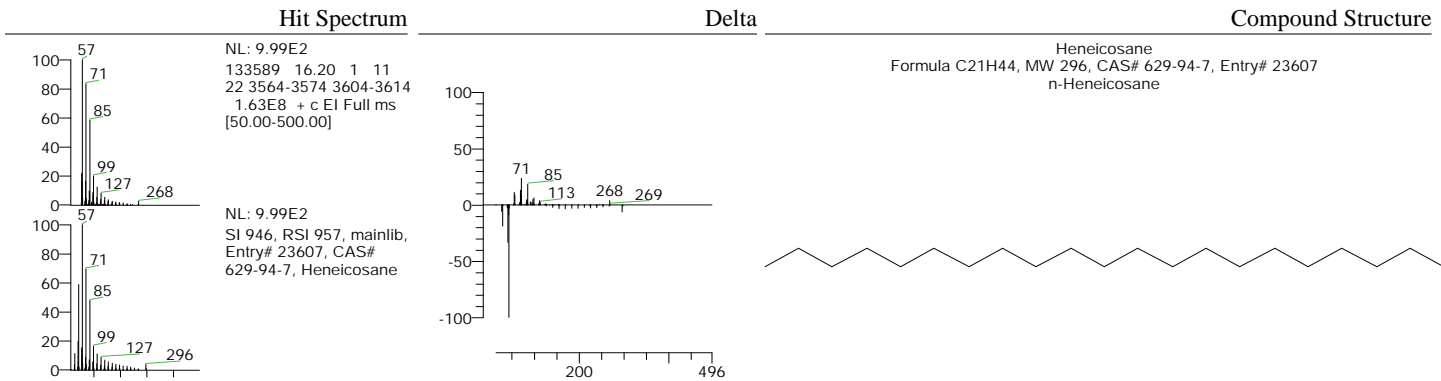

| RT    | Compound Name | Area       | Area % | RSI | Cas #    | Library |
|-------|---------------|------------|--------|-----|----------|---------|
| 16.20 | Eicosane      | 2626909217 | 1.74   | 983 | 112-95-8 | mainlib |
| 16.20 | Hexadecane    | 2626909217 | 1.74   | 966 | 544-76-3 | mainlib |
| 16.20 | Heptadecane   | 2626909217 | 1.74   | 962 | 629-78-7 | mainlib |

## Hit Spectrum

## Delta

## Compound Structure

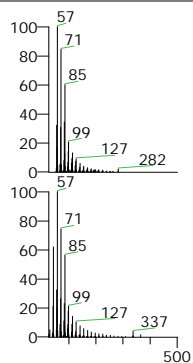

NL: 9.99E2  
133866 17.14 1 11  
22 3841-3851 3881-3891  
1.51E8 + c EI Full ms  
[50.00-500.00]

NL: 9.99E2  
SI 929, RSI 957, mainlib,  
Entry# 23535, CAS# NA,  
2-methylhexacosane

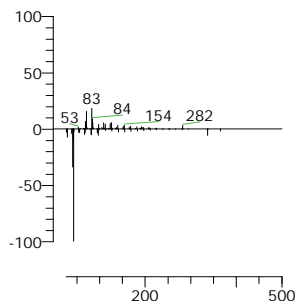

2-methylhexacosane  
Formula C<sub>27</sub>H<sub>56</sub>, MW 380, CAS# NA, Entry# 23535

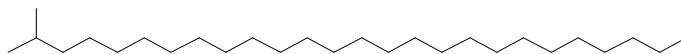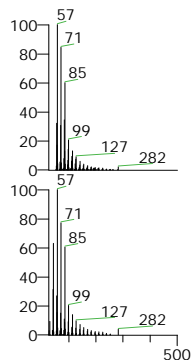

NL: 9.99E2  
133866 17.14 1 11  
22 3841-3851 3881-3891  
1.51E8 + c EI Full ms  
[50.00-500.00]

NL: 9.99E2  
SI 928, RSI 956, mainlib,  
Entry# 23557, CAS#  
112-95-8, Eicosane

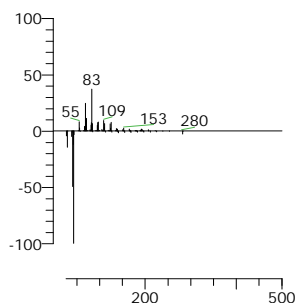

Eicosane  
Formula C<sub>20</sub>H<sub>42</sub>, MW 282, CAS# 112-95-8, Entry# 23557  
n-Eicosane

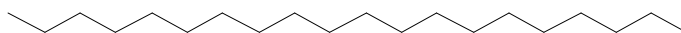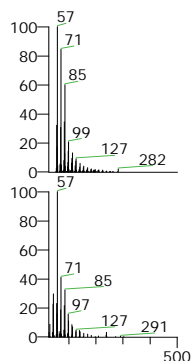

NL: 9.99E2  
133866 17.14 1 11  
22 3841-3851 3881-3891  
1.51E8 + c EI Full ms  
[50.00-500.00]

NL: 9.99E2  
SI 879, RSI 944, mainlib,  
Entry# 23670, CAS# NA,  
Sulfurous acid, butyl  
heptadecyl ester

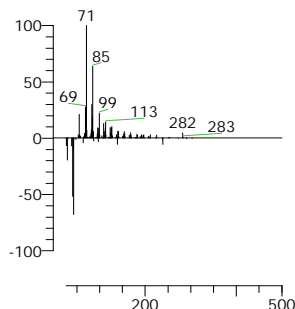

Sulfurous acid, butyl heptadecyl ester  
Formula C<sub>21</sub>H<sub>44</sub>O<sub>3</sub>S, MW 376, CAS# NA, Entry# 23670

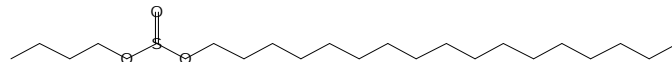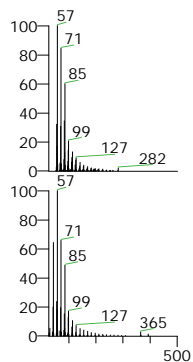

NL: 9.99E2  
133866 17.14 1 11  
22 3841-3851 3881-3891  
1.51E8 + c EI Full ms  
[50.00-500.00]

NL: 9.99E2  
SI 900, RSI 943, mainlib,  
Entry# 23536, CAS# NA,  
2-methyloctacosane

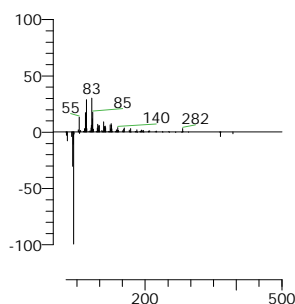

2-methyloctacosane  
Formula C<sub>29</sub>H<sub>60</sub>, MW 408, CAS# NA, Entry# 23536

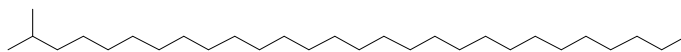

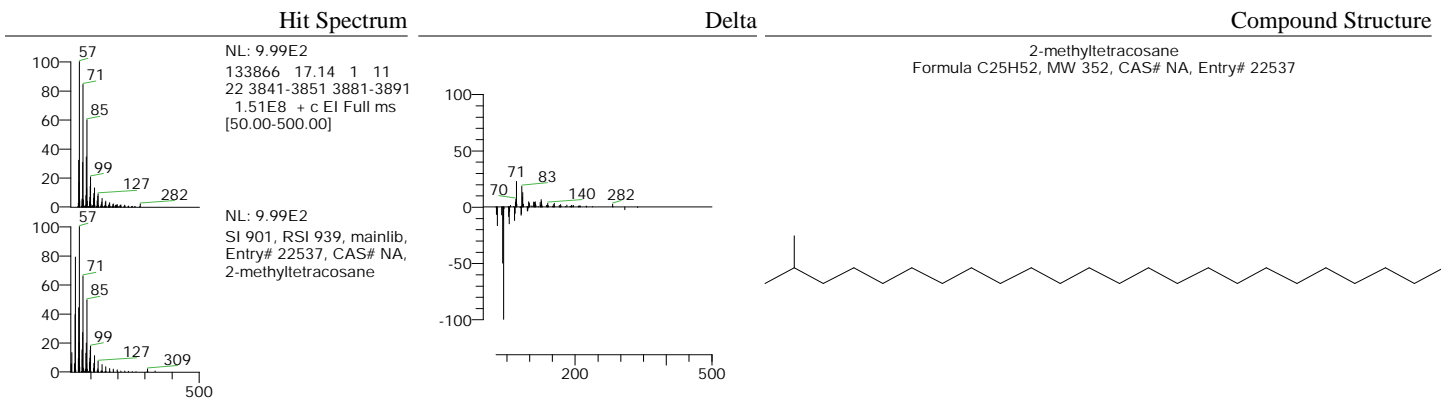

| RT    | Compound Name                          | Area       | Area % | RSI | Cas #    | Library |
|-------|----------------------------------------|------------|--------|-----|----------|---------|
| 17.14 | 2-methylhexacosane                     | 4086590346 | 2.71   | 957 | NA       | mainlib |
| 17.14 | Eicosane                               | 4086590346 | 2.71   | 956 | 112-95-8 | mainlib |
| 17.14 | Sulfurous acid, butyl heptadecyl ester | 4086590346 | 2.71   | 944 | NA       | mainlib |

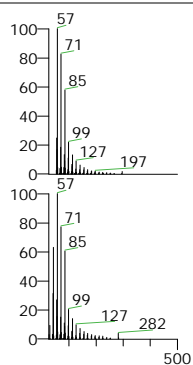

NL: 9.99E2  
134131 18.04 1 11  
22 4106-4116 4146-4156  
1.26E8 + c EI Full ms  
[50.00-500.00]

NL: 9.99E2  
SI 975, RSI 982, mainlib,  
Entry# 23557, CAS#  
112-95-8, Eicosane

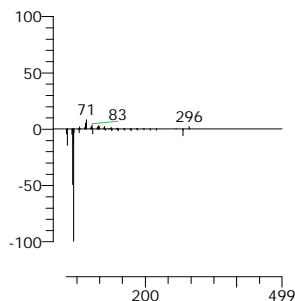

Eicosane  
Formula C<sub>20</sub>H<sub>42</sub>, MW 282, CAS# 112-95-8, Entry# 23557  
n-Eicosane

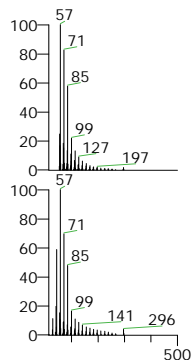

NL: 9.99E2  
134131 18.04 1 11  
22 4106-4116 4146-4156  
1.26E8 + c EI Full ms  
[50.00-500.00]

NL: 9.99E2  
SI 962, RSI 966, mainlib,  
Entry# 23607, CAS#  
629-94-7, Heneicosane

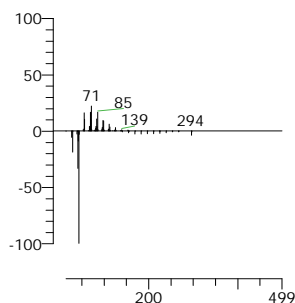

Heneicosane  
Formula C<sub>21</sub>H<sub>44</sub>, MW 296, CAS# 629-94-7, Entry# 23607  
n-Heneicosane

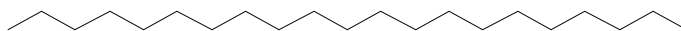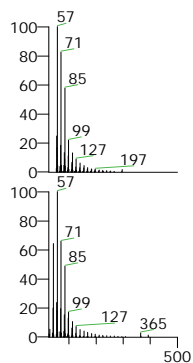

NL: 9.99E2  
134131 18.04 1 11  
22 4106-4116 4146-4156  
1.26E8 + c EI Full ms  
[50.00-500.00]

NL: 9.99E2  
SI 947, RSI 964, mainlib,  
Entry# 23536, CAS# NA,  
2-methyloctacosane

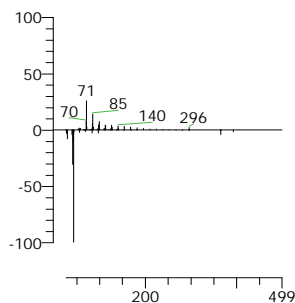

2-methyloctacosane  
Formula C<sub>29</sub>H<sub>60</sub>, MW 408, CAS# NA, Entry# 23536

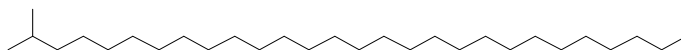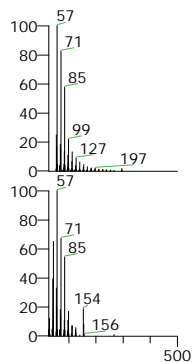

NL: 9.99E2  
134131 18.04 1 11  
22 4106-4116 4146-4156  
1.26E8 + c EI Full ms  
[50.00-500.00]

NL: 9.99E2  
SI 889, RSI 960, mainlib,  
Entry# 23599, CAS#  
56862-62-5,  
10-Methylnonadecane

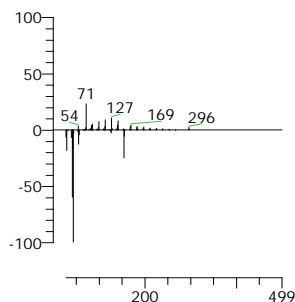

10-Methylnonadecane  
Formula C<sub>20</sub>H<sub>42</sub>, MW 282, CAS# 56862-62-5, Entry# 23599  
Nonadecane, 10-methyl





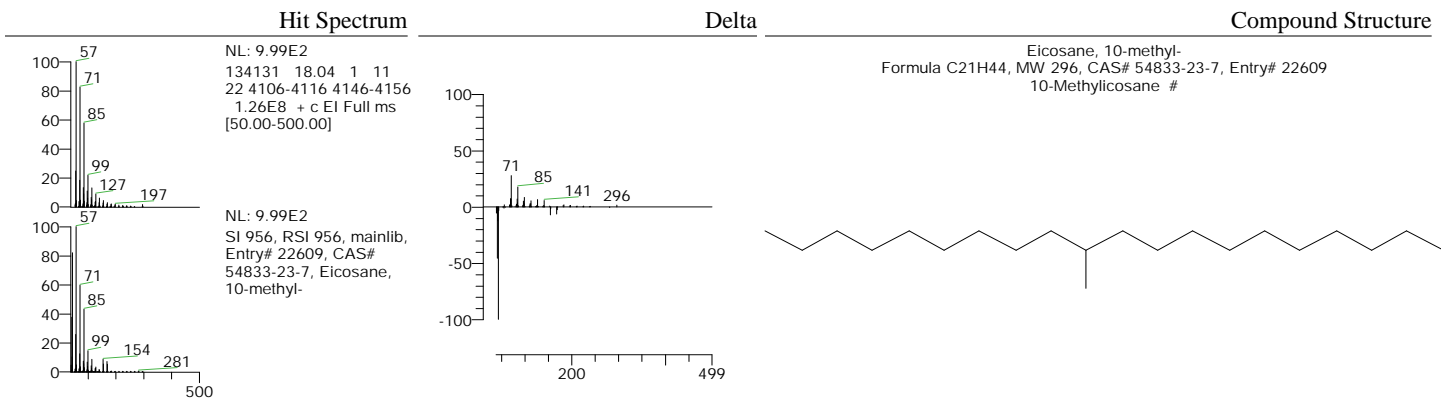

| RT    | Compound Name      | Area       | Area % | RSI | Cas #    | Library |
|-------|--------------------|------------|--------|-----|----------|---------|
| 18.04 | Eicosane           | 2891362267 | 1.92   | 982 | 112-95-8 | mainlib |
| 18.04 | Heneicosane        | 2891362267 | 1.92   | 966 | 629-94-7 | mainlib |
| 18.04 | 2-methyloctacosane | 2891362267 | 1.92   | 964 | NA       | mainlib |

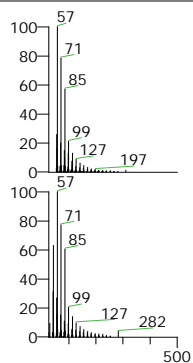

NL: 9.99E2  
134385 18.91 1 11  
22 4360-4370 4400-4410  
1.06E8 + c EI Full ms  
[50.00-500.00]

NL: 9.99E2  
SI 963, RSI 977, mainlib,  
Entry# 23557, CAS#  
112-95-8, Eicosane

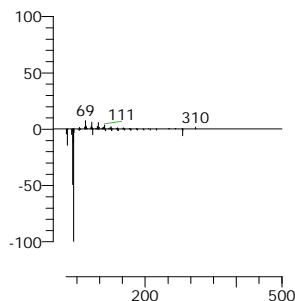

Eicosane  
Formula C<sub>20</sub>H<sub>42</sub>, MW 282, CAS# 112-95-8, Entry# 23557  
n-Eicosane

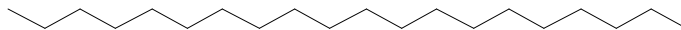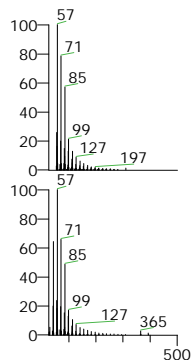

NL: 9.99E2  
134385 18.91 1 11  
22 4360-4370 4400-4410  
1.06E8 + c EI Full ms  
[50.00-500.00]

NL: 9.99E2  
SI 943, RSI 964, mainlib,  
Entry# 23536, CAS# NA,  
2-methyloctacosane

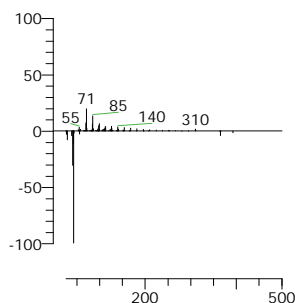

2-methyloctacosane  
Formula C<sub>29</sub>H<sub>60</sub>, MW 408, CAS# NA, Entry# 23536

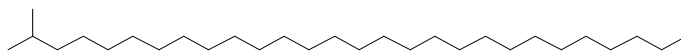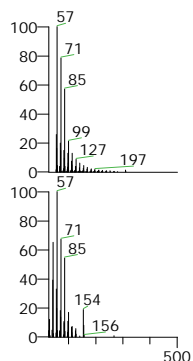

NL: 9.99E2  
134385 18.91 1 11  
22 4360-4370 4400-4410  
1.06E8 + c EI Full ms  
[50.00-500.00]

NL: 9.99E2  
SI 881, RSI 960, mainlib,  
Entry# 23599, CAS#  
56862-62-5,  
10-Methylnonadecane

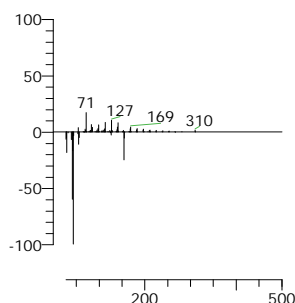

10-Methylnonadecane  
Formula C<sub>20</sub>H<sub>42</sub>, MW 282, CAS# 56862-62-5, Entry# 23599  
Nonadecane, 10-methyl

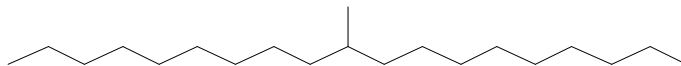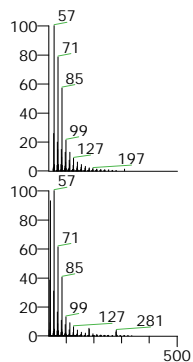

NL: 9.99E2  
134385 18.91 1 11  
22 4360-4370 4400-4410  
1.06E8 + c EI Full ms  
[50.00-500.00]

NL: 9.99E2  
SI 956, RSI 959, mainlib,  
Entry# 22628, CAS#  
55333-99-8, Eicosane,  
7-hexyl-

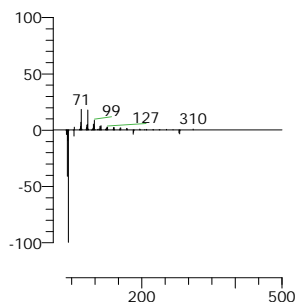

Eicosane, 7-hexyl-  
Formula C<sub>26</sub>H<sub>54</sub>, MW 366, CAS# 55333-99-8, Entry# 22628  
7-n-Hexyleicosane

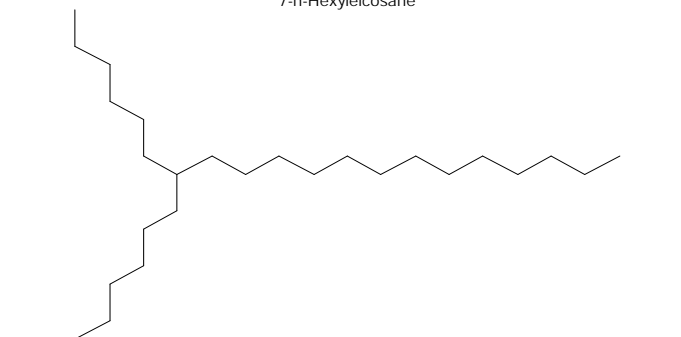

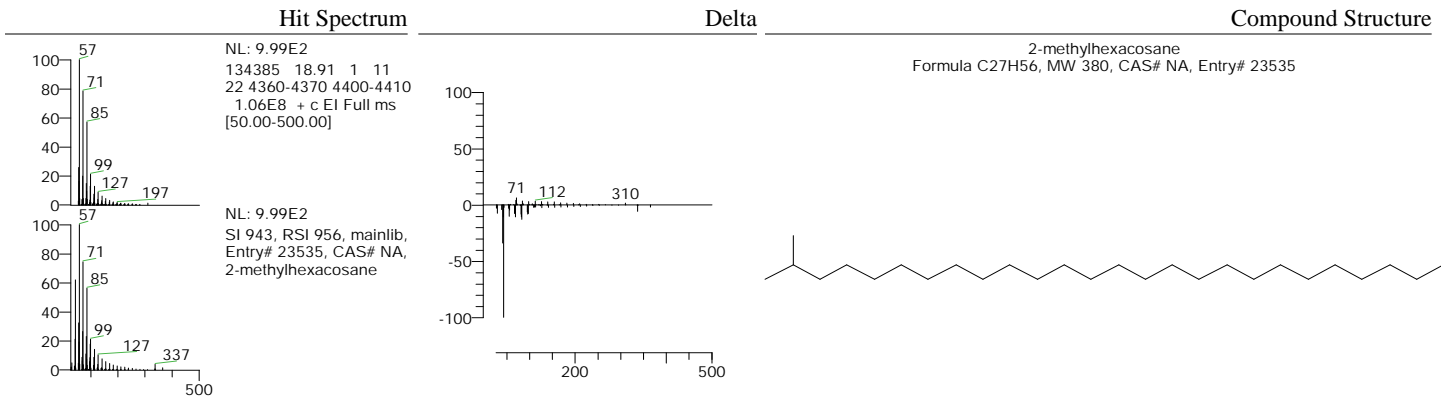

| RT    | Compound Name       | Area       | Area % | RSI | Cas #      | Library |
|-------|---------------------|------------|--------|-----|------------|---------|
| 18.91 | Eicosane            | 2465669529 | 1.64   | 977 | 112-95-8   | mainlib |
| 18.91 | 2-methyloctacosane  | 2465669529 | 1.64   | 964 | NA         | mainlib |
| 18.91 | 10-Methylnonadecane | 2465669529 | 1.64   | 960 | 56862-62-5 | mainlib |

Analysed By:

Checked By:

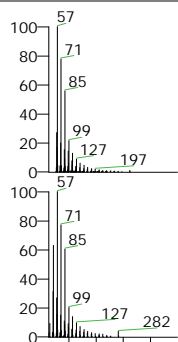

NL: 9.99E2  
134626 19.73 1 11  
22 4601-4611 4641-4651  
8.26E7 + c EI Full ms  
[50.00-500.00]

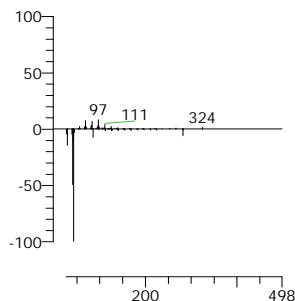

Eicosane  
Formula C<sub>20</sub>H<sub>42</sub>, MW 282, CAS# 112-95-8, Entry# 23557  
n-Eicosane

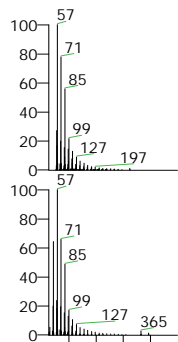

NL: 9.99E2  
134626 19.73 1 11  
22 4601-4611 4641-4651  
8.26E7 + c EI Full ms  
[50.00-500.00]

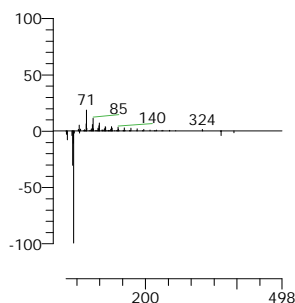

2-methyloctacosane  
Formula C<sub>29</sub>H<sub>60</sub>, MW 408, CAS# NA, Entry# 23536

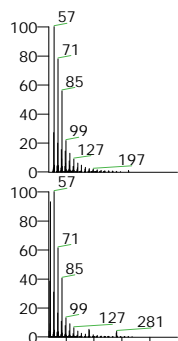

NL: 9.99E2  
134626 19.73 1 11  
22 4601-4611 4641-4651  
8.26E7 + c EI Full ms  
[50.00-500.00]

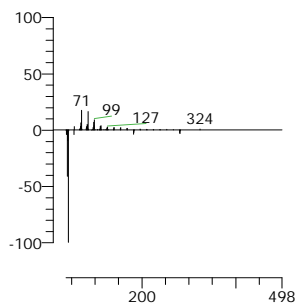

Eicosane, 7-hexyl-  
Formula C<sub>26</sub>H<sub>54</sub>, MW 366, CAS# 55333-99-8, Entry# 22628  
7-n-Hexyleicosane

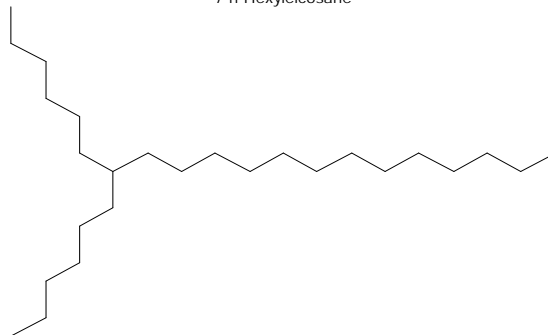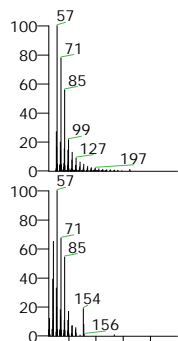

NL: 9.99E2  
134626 19.73 1 11  
22 4601-4611 4641-4651  
8.26E7 + c EI Full ms  
[50.00-500.00]

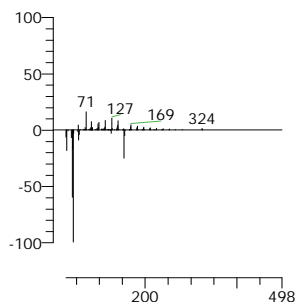

10-Methylnonadecane  
Formula C<sub>20</sub>H<sub>42</sub>, MW 282, CAS# 56862-62-5, Entry# 23599  
Nonadecane, 10-methyl



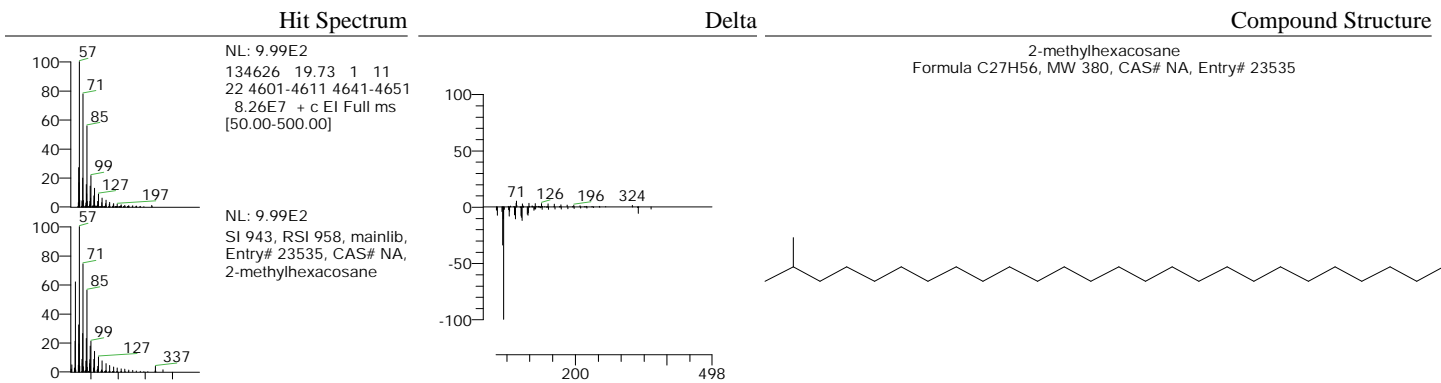

| RT    | Compound Name      | Area       | Area % | RSI | Cas #      | Library |
|-------|--------------------|------------|--------|-----|------------|---------|
| 19.73 | Eicosane           | 1640671809 | 1.09   | 975 | 112-95-8   | mainlib |
| 19.73 | 2-methyloctacosane | 1640671809 | 1.09   | 966 | NA         | mainlib |
| 19.73 | Eicosane, 7-hexyl- | 1640671809 | 1.09   | 962 | 55333-99-8 | mainlib |

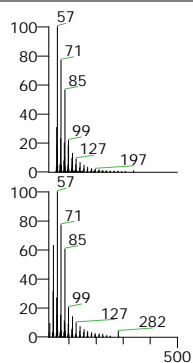

NL: 9.99E2  
134859 20.52 1 11  
22 4834-4844 4874-4884  
6.78E7 + c EI Full ms  
[50.00-500.00]

NL: 9.99E2  
SI 951, RSI 966, mainlib,  
Entry# 23557, CAS#  
112-95-8, Eicosane

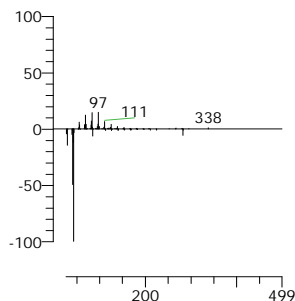

Eicosane  
Formula C<sub>20</sub>H<sub>42</sub>, MW 282, CAS# 112-95-8, Entry# 23557  
n-Eicosane

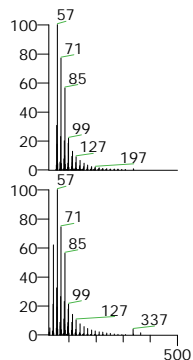

NL: 9.99E2  
134859 20.52 1 11  
22 4834-4844 4874-4884  
6.78E7 + c EI Full ms  
[50.00-500.00]

NL: 9.99E2  
SI 955, RSI 964, mainlib,  
Entry# 23535, CAS# NA,  
2-methylhexacosane

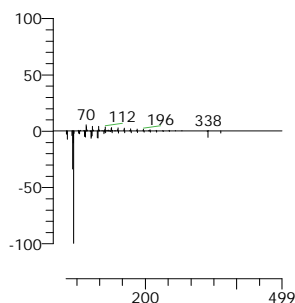

2-methylhexacosane  
Formula C<sub>27</sub>H<sub>56</sub>, MW 380, CAS# NA, Entry# 23535

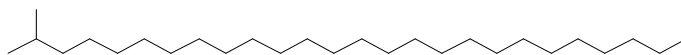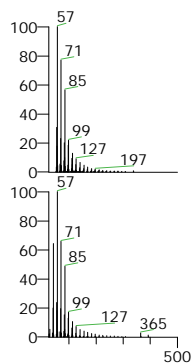

NL: 9.99E2  
134859 20.52 1 11  
22 4834-4844 4874-4884  
6.78E7 + c EI Full ms  
[50.00-500.00]

NL: 9.99E2  
SI 942, RSI 961, mainlib,  
Entry# 23536, CAS# NA,  
2-methyloctacosane

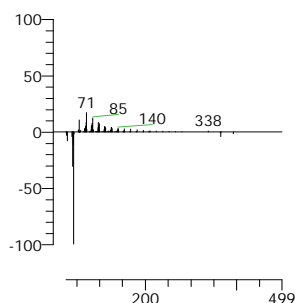

2-methyloctacosane  
Formula C<sub>29</sub>H<sub>60</sub>, MW 408, CAS# NA, Entry# 23536

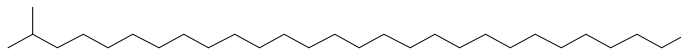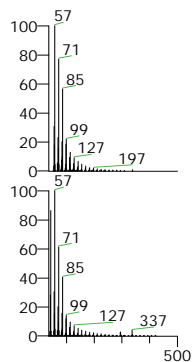

NL: 9.99E2  
134859 20.52 1 11  
22 4834-4844 4874-4884  
6.78E7 + c EI Full ms  
[50.00-500.00]

NL: 9.99E2  
SI 959, RSI 960, mainlib,  
Entry# 22683, CAS#  
55429-84-0,  
Tetraacosane, 11-decyl-

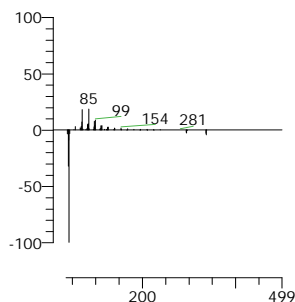

Tetraacosane, 11-decyl-  
Formula C<sub>34</sub>H<sub>70</sub>, MW 478, CAS# 55429-84-0, Entry# 22683  
11-n-Decyltetraacosane

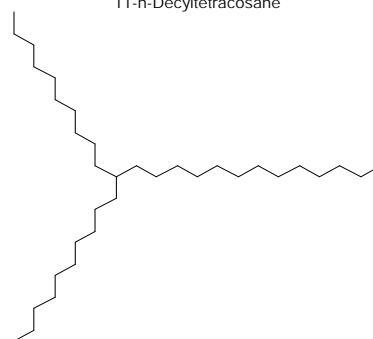

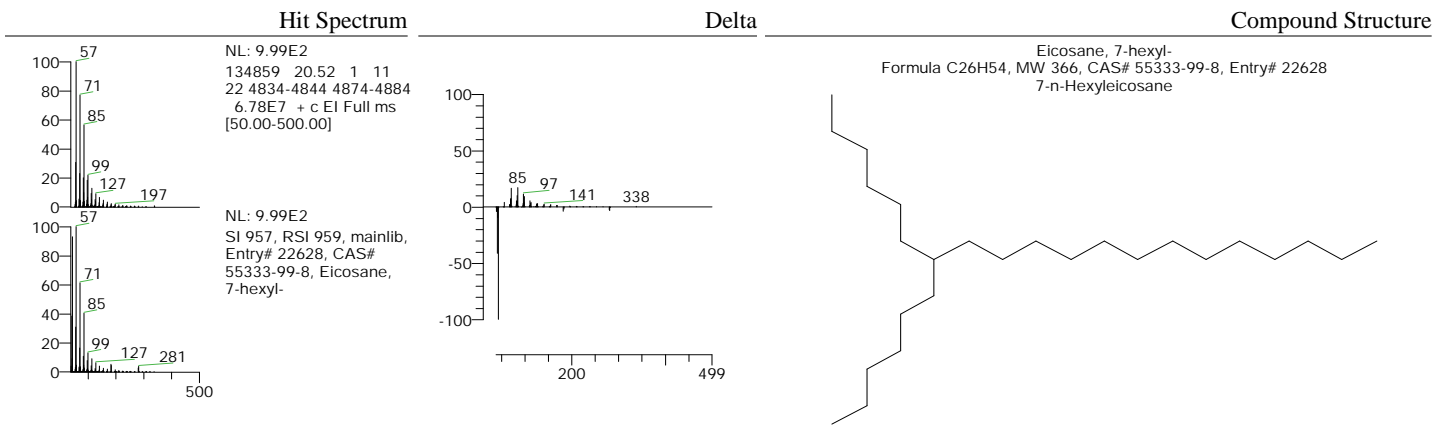

| RT    | Compound Name      | Area       | Area % | RSI | Cas #    | Library |
|-------|--------------------|------------|--------|-----|----------|---------|
| 20.52 | Eicosane           | 1391924842 | 0.92   | 966 | 112-95-8 | mainlib |
| 20.52 | 2-methylhexacosane | 1391924842 | 0.92   | 964 | NA       | mainlib |
| 20.52 | 2-methyloctacosane | 1391924842 | 0.92   | 961 | NA       | mainlib |
