# Supplementary material
Source: publisher figshare collection journal article supplement (https://tandf.figshare.com/articles/dataset/_/7418354)
Supplement: Supplementary file 2 [file 1]

Data File: 6  
Sample ID: 1  
Comments:  
Low Mass(m/z): 50

Injection Volume(µl): 1.00  
Run Time(min): 28.10  
Scans: 8261  
High Mass(m/z): 500

RT: 4.00 - 32.00 SM: 15G

NL:  
3.00E9  
TIC MS 6

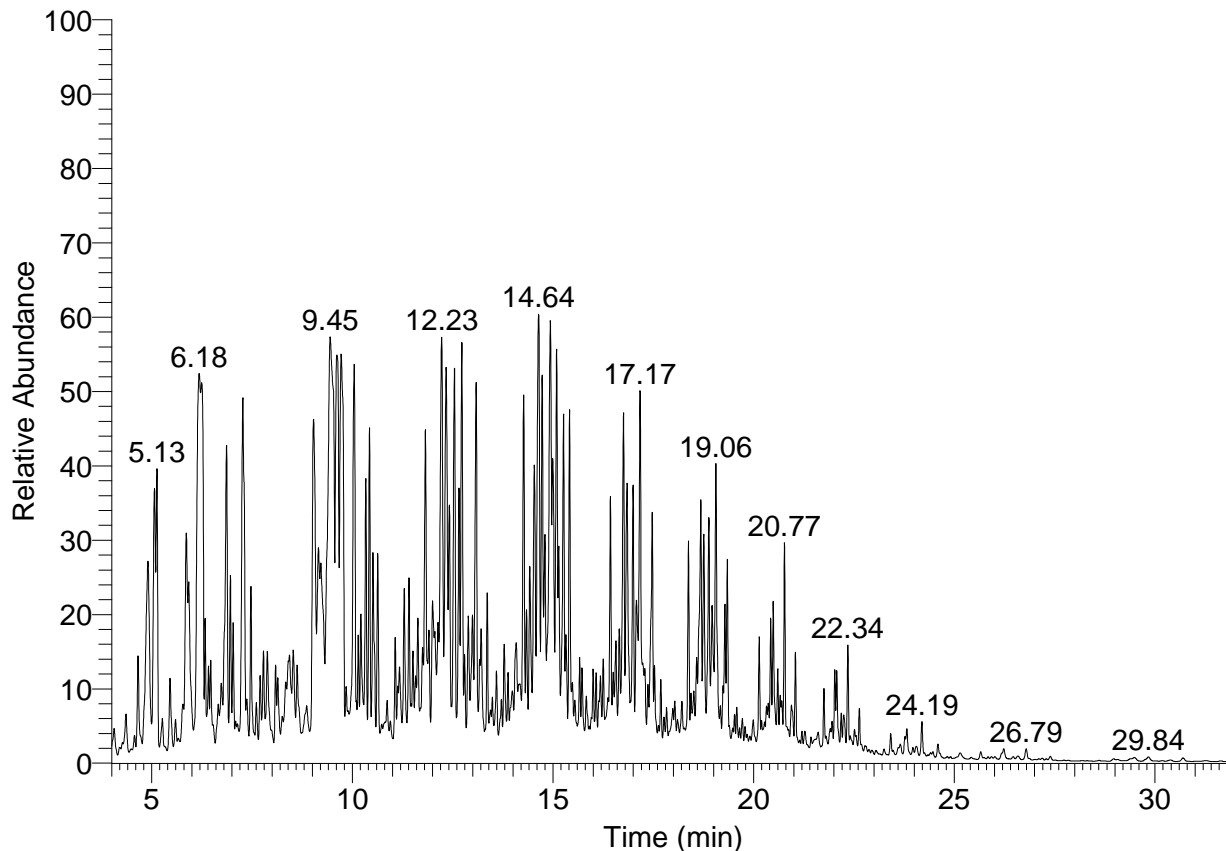

| RT   | Compound Name                         | Area       | Area % | RSI | Cas #      | Library |
|------|---------------------------------------|------------|--------|-----|------------|---------|
| 4.91 | 2,6-Dimethyl-6-trifluoroacetoxyoctane | 4216911828 | 2.23   | 918 | 61986-67-2 | mainlib |
| RT   | Compound Name                         | Area       | Area % | RSI | Cas #      | Library |
| 5.07 | Oxalic acid, 2-ethylhexyl hexyl ester | 3508789798 | 1.86   | 930 | NA         | mainlib |
| RT   | Compound Name                         | Area       | Area % | RSI | Cas #      | Library |
| 5.13 | Oxalic acid, 2-ethylhexyl hexyl ester | 2927178767 | 1.55   | 920 | NA         | mainlib |
| RT   | Compound Name                         | Area       | Area % | RSI | Cas #      | Library |
| 5.86 | 2-Decene, 2,4-dimethyl-               | 3036413349 | 1.61   | 902 | 74421-03-7 | mainlib |
| RT   | Compound Name                         | Area       | Area % | RSI | Cas #      | Library |
| 6.18 | Cyclopentane, 1-butyl-2-propyl-       | 7462185391 | 3.95   | 874 | 62199-50-2 | mainlib |
| RT   | Compound Name                         | Area       | Area % | RSI | Cas #      | Library |
| 6.25 | 5-Ethyl-1-nonene                      | 5786939639 | 3.06   | 868 | 19780-74-6 | mainlib |
| RT   | Compound Name                         | Area       | Area % | RSI | Cas #      | Library |
| 6.87 | 1-Dodecanol, 3,7,11-trimethyl-        | 4548856556 | 2.41   | 888 | 6750-34-1  | mainlib |
| RT   | Compound Name                         | Area       | Area % | RSI | Cas #      | Library |
| 6.96 | Acetic acid, trichloro-, octyl ester  | 1346835308 | 0.71   | 895 | 16958-78-4 | mainlib |
| RT   | Compound Name                         | Area       | Area % | RSI | Cas #      | Library |
| 7.27 | 4-Nonene, 2,3,3-trimethyl-, (Z)-      | 6206082993 | 3.29   | 865 | 63830-68-2 | mainlib |

Analysed By:

Checked By:

| RT    | Compound Name                              | Area        | Area % | RSI | Cas #      | Library |
|-------|--------------------------------------------|-------------|--------|-----|------------|---------|
| 7.47  | 4-Nonene, 2,3,3-trimethyl-, (E)-           | 1581096360  | 0.84   | 871 | 63830-67-1 | mainlib |
| RT    | Compound Name                              | Area        | Area % | RSI | Cas #      | Library |
| 9.03  | Oxalic acid, cyclohexyl tetradecyl ester   | 5844511228  | 3.09   | 884 | NA         | mainlib |
| RT    | Compound Name                              | Area        | Area % | RSI | Cas #      | Library |
| 9.44  | 3-Eicosene, (E)-                           | 10653383551 | 5.64   | 893 | 74685-33-9 | mainlib |
| RT    | Compound Name                              | Area        | Area % | RSI | Cas #      | Library |
| 9.64  | Dichloroacetic acid, 6-ethyl-3-octyl ester | 5295349553  | 2.80   | 891 | NA         | mainlib |
| RT    | Compound Name                              | Area        | Area % | RSI | Cas #      | Library |
| 9.72  | 1-Decanol, 2-hexyl-                        | 7669227459  | 4.06   | 887 | 2425-77-6  | mainlib |
| RT    | Compound Name                              | Area        | Area % | RSI | Cas #      | Library |
| 10.05 | 1-Dodecanol, 3,7,11-trimethyl-             | 5412264755  | 2.87   | 881 | 6750-34-1  | mainlib |
| RT    | Compound Name                              | Area        | Area % | RSI | Cas #      | Library |
| 10.33 | 1-Dodecanol, 3,7,11-trimethyl-             | 2361823358  | 1.25   | 903 | 6750-34-1  | mainlib |
| RT    | Compound Name                              | Area        | Area % | RSI | Cas #      | Library |
| 10.43 | 4-Nonene, 3-methyl-, (Z)-                  | 2819469763  | 1.49   | 849 | 63830-69-3 | mainlib |
| RT    | Compound Name                              | Area        | Area % | RSI | Cas #      | Library |
| 10.51 | 1-Cyclohexyl-1-(4-methylcyclohexyl)ethane  | 2217671643  | 1.17   | 930 | 2027-12-5  | mainlib |
| RT    | Compound Name                              | Area        | Area % | RSI | Cas #      | Library |
| 10.63 | 2-Hexyl-1-octanol                          | 1689888683  | 0.89   | 918 | 19780-79-1 | mainlib |
| RT    | Compound Name                              | Area        | Area % | RSI | Cas #      | Library |
| 11.41 | 10-Methylnonadecane                        | 1484406118  | 0.79   | 939 | 56862-62-5 | mainlib |
| RT    | Compound Name                              | Area        | Area % | RSI | Cas #      | Library |
| 11.82 | Tetradecyl trifluoroacetate                | 3709529236  | 1.96   | 885 | 6222-02-2  | mainlib |
| RT    | Compound Name                              | Area        | Area % | RSI | Cas #      | Library |
| 12.23 | 1-Dodecanol, 3,7,11-trimethyl-             | 6512101996  | 3.45   | 908 | 6750-34-1  | mainlib |
| RT    | Compound Name                              | Area        | Area % | RSI | Cas #      | Library |
| 12.34 | 1-Dodecanol, 3,7,11-trimethyl-             | 5533453585  | 2.93   | 913 | 6750-34-1  | mainlib |
| RT    | Compound Name                              | Area        | Area % | RSI | Cas #      | Library |
| 12.42 | 1-Dodecanol, 3,7,11-trimethyl-             | 2257684067  | 1.20   | 926 | 6750-34-1  | mainlib |
| RT    | Compound Name                              | Area        | Area % | RSI | Cas #      | Library |
| 12.55 | 2-Hexyl-1-octanol                          | 4364120807  | 2.31   | 914 | 19780-79-1 | mainlib |
| RT    | Compound Name                              | Area        | Area % | RSI | Cas #      | Library |
| 12.66 | 2-Hexyl-1-octanol                          | 2350831207  | 1.24   | 927 | 19780-79-1 | mainlib |
| RT    | Compound Name                              | Area        | Area % | RSI | Cas #      | Library |
| 12.73 | Cyclopropanol, 1-(3,7-dimethyl-1-octenyl)- | 4480824939  | 2.37   | 872 | 65147-72-0 | mainlib |
| RT    | Compound Name                              | Area        | Area % | RSI | Cas #      | Library |
| 13.09 | 1-Cyclohexyl-1-(4-methylcyclohexyl)ethane  | 4106094629  | 2.17   | 885 | 2027-12-5  | mainlib |
| RT    | Compound Name                              | Area        | Area % | RSI | Cas #      | Library |
| 14.27 | n-Nonadecanol-1                            | 3292963247  | 1.74   | 855 | 1454-84-8  | mainlib |
| RT    | Compound Name                              | Area        | Area % | RSI | Cas #      | Library |
| 14.53 | n-Nonadecanol-1                            | 2772367577  | 1.47   | 864 | 1454-84-8  | mainlib |
| RT    | Compound Name                              | Area        | Area % | RSI | Cas #      | Library |
| 14.64 | Nonadecyl trifluoroacetate                 | 5626251068  | 2.98   | 897 | NA         | mainlib |

*Analysed By:*

*Checked By:*

| RT    | Compound Name                                    | Area       | Area % | RSI | Cas #      | Library |
|-------|--------------------------------------------------|------------|--------|-----|------------|---------|
| 14.73 | n-Tetracosanol-1                                 | 3025208575 | 1.60   | 871 | 506-51-4   | mainlib |
| RT    | Compound Name                                    | Area       | Area % | RSI | Cas #      | Library |
| 14.94 | Nonadecyl trifluoroacetate                       | 8290070338 | 4.39   | 892 | NA         | mainlib |
| RT    | Compound Name                                    | Area       | Area % | RSI | Cas #      | Library |
| 15.09 | Cyclopropanol, 1-(3,7-dimethyl-1-octenyl)-       | 3719941710 | 1.97   | 857 | 65147-72-0 | mainlib |
| RT    | Compound Name                                    | Area       | Area % | RSI | Cas #      | Library |
| 15.14 | Nonadecyl trifluoroacetate                       | 1317781054 | 0.70   | 919 | NA         | mainlib |
| RT    | Compound Name                                    | Area       | Area % | RSI | Cas #      | Library |
| 15.26 | 2-Hexyl-1-octanol                                | 3383899138 | 1.79   | 908 | 19780-79-1 | mainlib |
| RT    | Compound Name                                    | Area       | Area % | RSI | Cas #      | Library |
| 15.41 | 1-Cyclohexyl-1-(4-methylcyclohexyl)ethane        | 3132137554 | 1.66   | 880 | 2027-12-5  | mainlib |
| RT    | Compound Name                                    | Area       | Area % | RSI | Cas #      | Library |
| 16.43 | Nonadecyl trifluoroacetate                       | 2299670507 | 1.22   | 875 | NA         | mainlib |
| RT    | Compound Name                                    | Area       | Area % | RSI | Cas #      | Library |
| 16.76 | Nonadecyl trifluoroacetate                       | 3689810362 | 1.95   | 904 | NA         | mainlib |
| RT    | Compound Name                                    | Area       | Area % | RSI | Cas #      | Library |
| 16.85 | Dodecane, 1-cyclopentyl-4-(3-cyclopentylpropyl)- | 3263819249 | 1.73   | 846 | 7225-68-5  | mainlib |
| RT    | Compound Name                                    | Area       | Area % | RSI | Cas #      | Library |
| 16.99 | Nonadecyl trifluoroacetate                       | 2300550914 | 1.22   | 899 | NA         | mainlib |
| RT    | Compound Name                                    | Area       | Area % | RSI | Cas #      | Library |
| 17.17 | Cyclopropanol, 1-(3,7-dimethyl-1-octenyl)-       | 4757920691 | 2.52   | 865 | 65147-72-0 | mainlib |
| RT    | Compound Name                                    | Area       | Area % | RSI | Cas #      | Library |
| 17.47 | 1-Cyclohexyl-1-(4-methylcyclohexyl)ethane        | 2973370558 | 1.57   | 895 | 2027-12-5  | mainlib |
| RT    | Compound Name                                    | Area       | Area % | RSI | Cas #      | Library |
| 18.38 | Nonadecyl trifluoroacetate                       | 1680109151 | 0.89   | 879 | NA         | mainlib |
| RT    | Compound Name                                    | Area       | Area % | RSI | Cas #      | Library |
| 18.68 | 1-Dodecanol, 2-octyl-                            | 3104011398 | 1.64   | 902 | 5333-42-6  | mainlib |
| RT    | Compound Name                                    | Area       | Area % | RSI | Cas #      | Library |
| 18.76 | Dodecane, 1-cyclopentyl-4-(3-cyclopentylpropyl)- | 2041471843 | 1.08   | 850 | 7225-68-5  | mainlib |
| RT    | Compound Name                                    | Area       | Area % | RSI | Cas #      | Library |
| 18.88 | Nonadecyl trifluoroacetate                       | 2177413406 | 1.15   | 909 | NA         | mainlib |
| RT    | Compound Name                                    | Area       | Area % | RSI | Cas #      | Library |
| 19.06 | Cyclopropanol, 1-(3,7-dimethyl-1-octenyl)-       | 3187026369 | 1.69   | 856 | 65147-72-0 | mainlib |
| RT    | Compound Name                                    | Area       | Area % | RSI | Cas #      | Library |
| 19.34 | Dodecane, 1-cyclopentyl-4-(3-cyclopentylpropyl)- | 1715550777 | 0.91   | 866 | 7225-68-5  | mainlib |
| RT    | Compound Name                                    | Area       | Area % | RSI | Cas #      | Library |
| 20.77 | Dodecane, 1-cyclopentyl-4-(3-cyclopentylpropyl)- | 1722927524 | 0.91   | 856 | 7225-68-5  | mainlib |

Analysed By:

Checked By:

## Hit Spectrum

## Delta

## Compound Structure

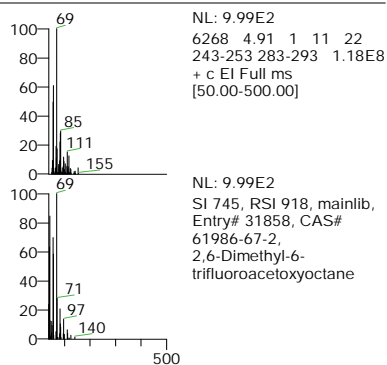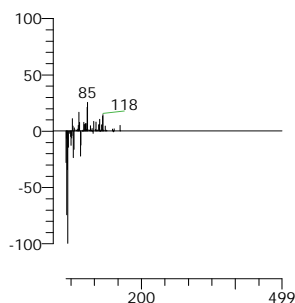

2,6-Dimethyl-6-trifluoroacetoxyoctane  
Formula C<sub>12</sub>H<sub>21</sub>F<sub>3</sub>O<sub>2</sub>, MW 254, CAS# 61986-67-2, Entry# 31858  
1-Ethyl-1,5-dimethylhexyl trifluoroacetate #

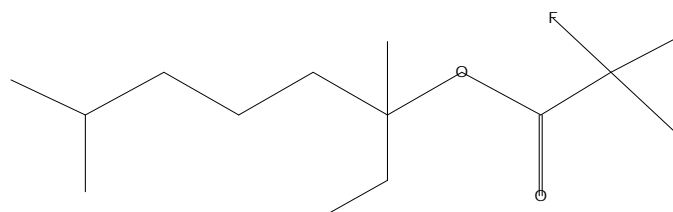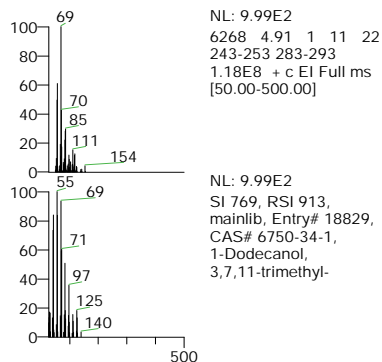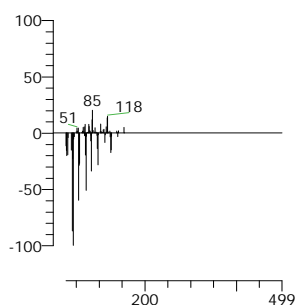

1-Dodecanol, 3,7,11-trimethyl-  
Formula C<sub>15</sub>H<sub>32</sub>O, MW 228, CAS# 6750-34-1, Entry# 18829  
Hexa-hydro-farnesol

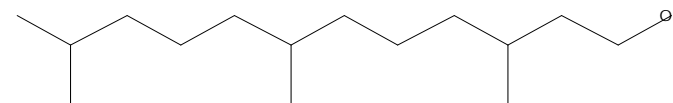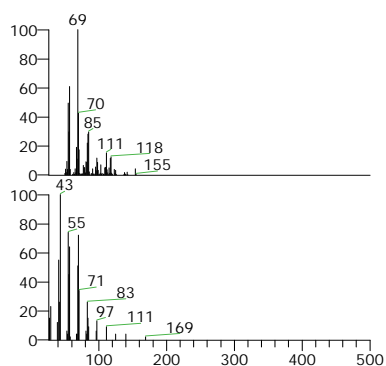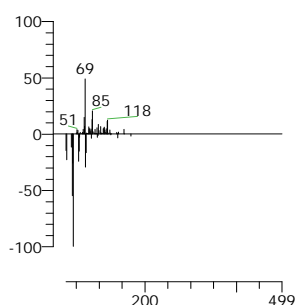

Acetic acid, trifluoro-, 3,7-dimethyloctyl ester  
Formula C<sub>12</sub>H<sub>21</sub>F<sub>3</sub>O<sub>2</sub>, MW 254, CAS# 28745-07-5, Entry# 6926  
Trifluoroacetyl-3,7-dimethyloctanol

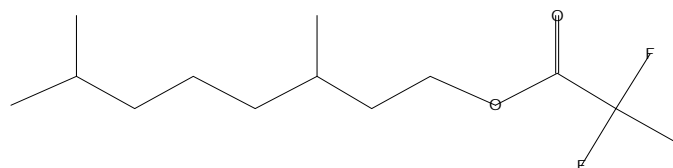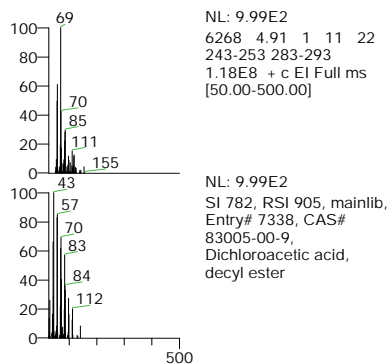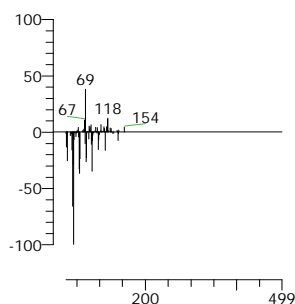

Dichloroacetic acid, decyl ester  
Formula C<sub>12</sub>H<sub>22</sub>Cl<sub>2</sub>O<sub>2</sub>, MW 268, CAS# 83005-00-9, Entry# 7338  
Decyl dichloroacetate #

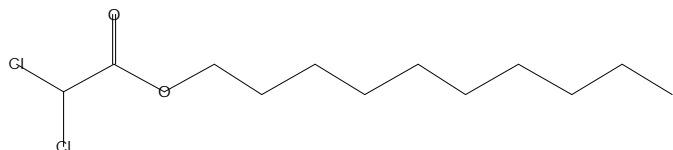

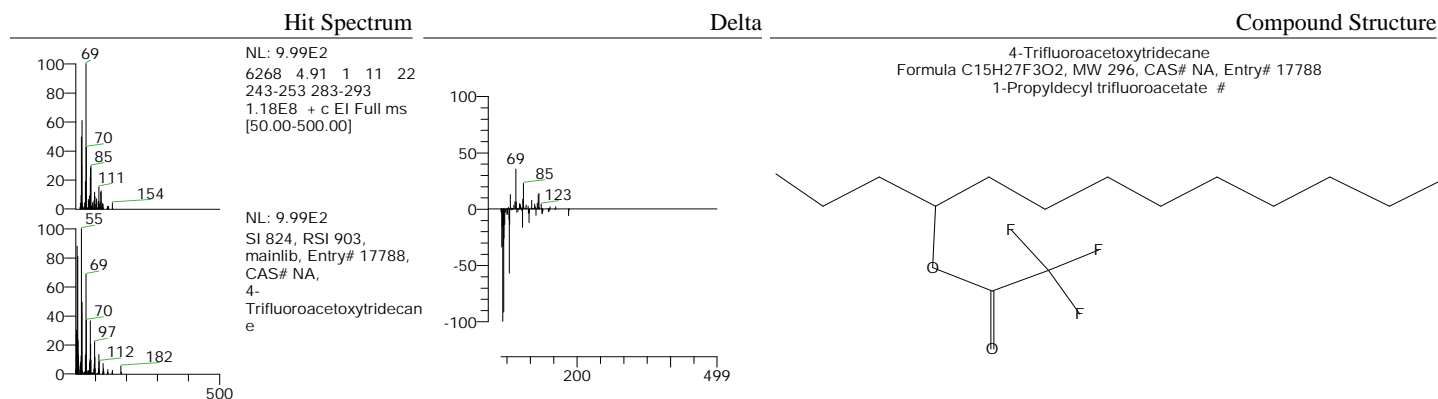

| RT   | Compound Name                                    | Area       | Area % | RSI | Cas #      | Library |
|------|--------------------------------------------------|------------|--------|-----|------------|---------|
| 4.91 | 2,6-Dimethyl-6-trifluoroacetoxyoctane            | 4216911828 | 2.23   | 918 | 61986-67-2 | mainlib |
| 4.91 | Acetic acid, trifluoro-, 3,7-dimethyloctyl ester | 4216911828 | 2.23   | 913 | 28745-07-5 | mainlib |
| 4.91 | 1-Dodecanol, 3,7,11-trimethyl-                   | 4216911828 | 2.23   | 913 | 6750-34-1  | mainlib |

Analysed By:

Checked By:

## Hit Spectrum

## Delta

## Compound Structure

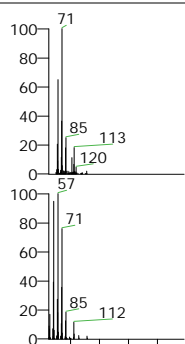

NL: 9.99E2  
6315 5.07 1 11 22  
290-300 330-340  
2.68E8 + c EI Full ms  
[50.00-500.00]

NL: 9.99E2  
SI 809, RSI 930,  
mainlib, Entry# 22519,  
CAS# NA, Oxalic acid,  
2-ethylhexyl hexyl ester

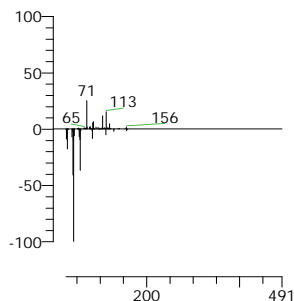

Oxalic acid, 2-ethylhexyl hexyl ester  
Formula C<sub>16</sub>H<sub>30</sub>O<sub>4</sub>, MW 286, CAS# NA, Entry# 22519

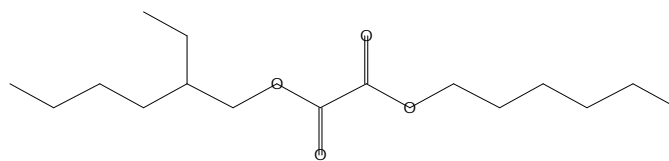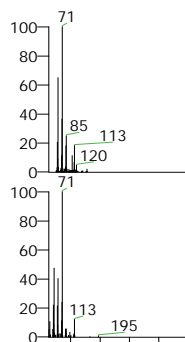

NL: 9.99E2  
6315 5.07 1 11 22  
290-300 330-340  
2.68E8 + c EI Full ms  
[50.00-500.00]

NL: 9.99E2  
SI 803, RSI 920,  
mainlib, Entry# 35068,  
CAS# NA, Sulfurous  
acid, octyl 2-pentyl ester

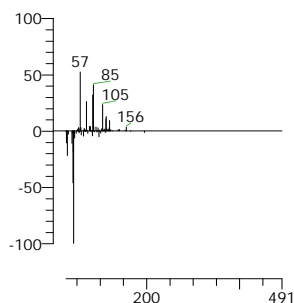

Sulfurous acid, octyl 2-pentyl ester  
Formula C<sub>13</sub>H<sub>28</sub>O<sub>3</sub>S, MW 264, CAS# NA, Entry# 35068

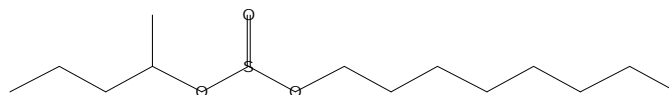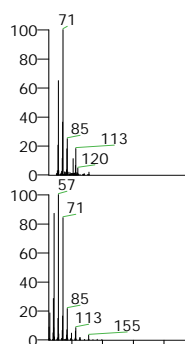

NL: 9.99E2  
6315 5.07 1 11 22  
290-300 330-340  
2.68E8 + c EI Full ms  
[50.00-500.00]

NL: 9.99E2  
SI 829, RSI 915,  
mainlib, Entry# 22695,  
CAS# 61141-72-8,  
Dodecane,  
4,6-dimethyl-

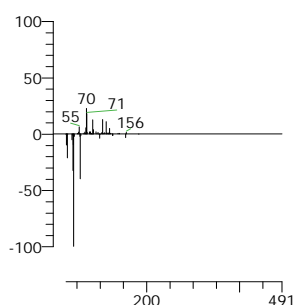

Dodecane, 4,6-dimethyl-  
Formula C<sub>14</sub>H<sub>30</sub>, MW 198, CAS# 61141-72-8, Entry# 22695  
4,6-Dimethyldodecane #

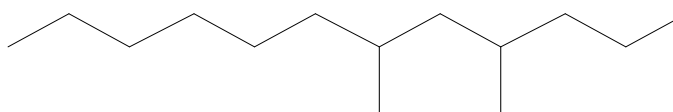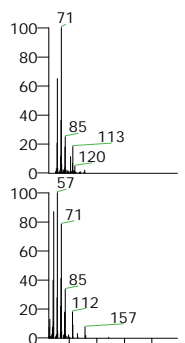

NL: 9.99E2  
6315 5.07 1 11 22  
290-300 330-340  
2.68E8 + c EI Full ms  
[50.00-500.00]

NL: 9.99E2  
SI 815, RSI 913, mainlib,  
Entry# 22518, CAS# NA,  
Oxalic acid, 2-ethylhexyl  
isohexyl ester

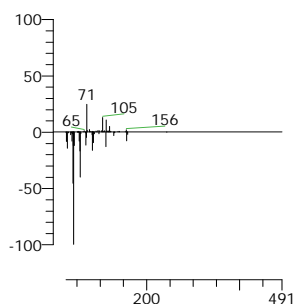

Oxalic acid, 2-ethylhexyl isohexyl ester  
Formula C<sub>16</sub>H<sub>30</sub>O<sub>4</sub>, MW 286, CAS# NA, Entry# 22518

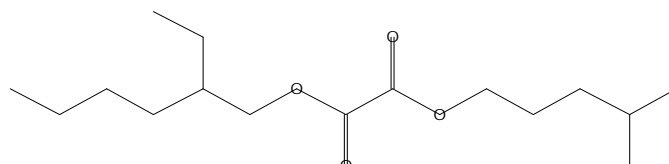

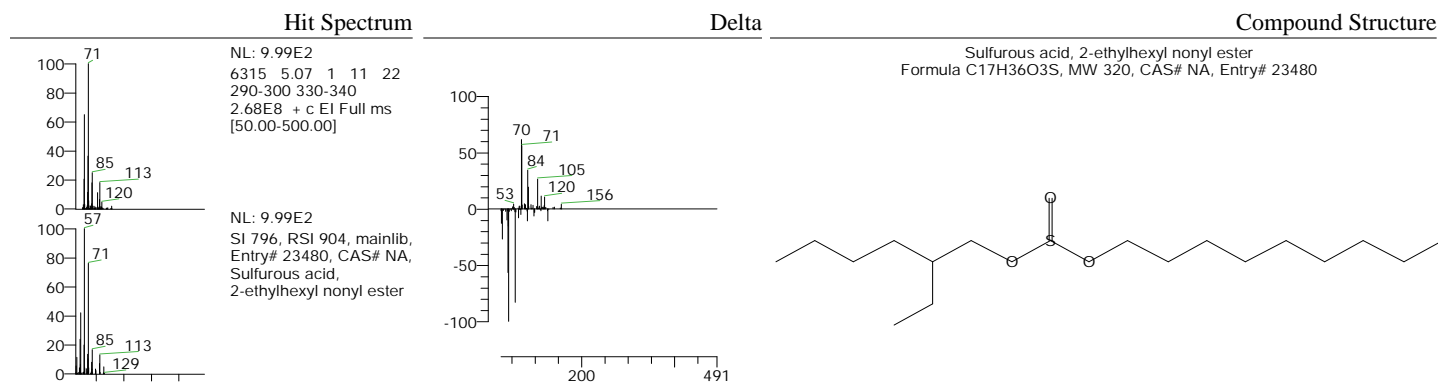

| RT   | Compound Name                         | Area       | Area % | RSI | Cas #      | Library |
|------|---------------------------------------|------------|--------|-----|------------|---------|
| 5.07 | Oxalic acid, 2-ethylhexyl hexyl ester | 3508789798 | 1.86   | 930 | NA         | mainlib |
| 5.07 | Sulfurous acid, octyl 2-pentyl ester  | 3508789798 | 1.86   | 920 | NA         | mainlib |
| 5.07 | Dodecane, 4,6-dimethyl-               | 3508789798 | 1.86   | 915 | 61141-72-8 | mainlib |

## Hit Spectrum

## Delta

## Compound Structure

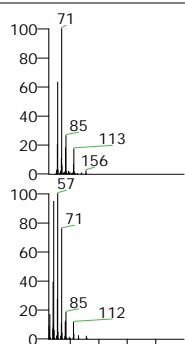

NL: 9.99E2  
6335 5.13 1 11 22  
310-320 350-360  
2.94E8 + c EI Full ms  
[50.00-500.00]  
  
NL: 9.99E2  
SI 876, RSI 920,  
mainlib, Entry# 22519,  
CAS# NA, Oxalic acid,  
2-ethylhexyl hexyl ester

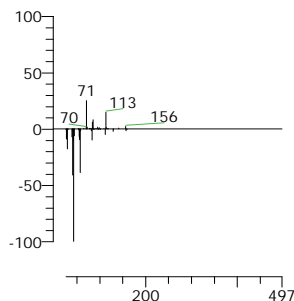

Oxalic acid, 2-ethylhexyl hexyl ester  
Formula C<sub>16</sub>H<sub>30</sub>O<sub>4</sub>, MW 286, CAS# NA, Entry# 22519

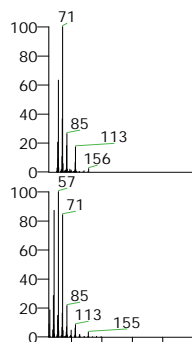

NL: 9.99E2  
6335 5.13 1 11 22  
310-320 350-360  
2.94E8 + c EI Full ms  
[50.00-500.00]  
  
NL: 9.99E2  
SI 903, RSI 912,  
mainlib, Entry# 22695,  
CAS# 61141-72-8,  
Dodecane,  
4,6-dimethyl-

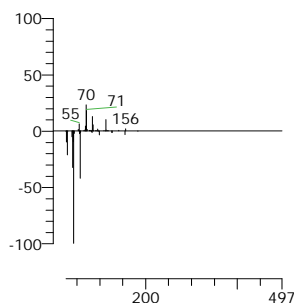

Dodecane, 4,6-dimethyl-  
Formula C<sub>14</sub>H<sub>30</sub>, MW 198, CAS# 61141-72-8, Entry# 22695  
4,6-Dimethyldodecane #

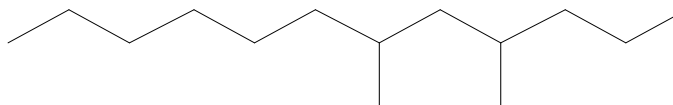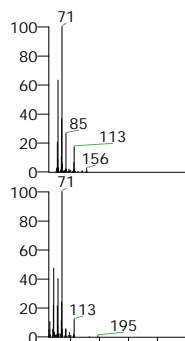

NL: 9.99E2  
6335 5.13 1 11 22  
310-320 350-360  
2.94E8 + c EI Full ms  
[50.00-500.00]  
  
NL: 9.99E2  
SI 865, RSI 906,  
mainlib, Entry# 35068,  
CAS# NA, Sulfurous  
acid, octyl 2-pentyl ester

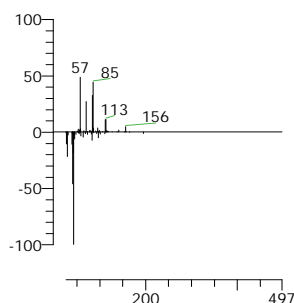

Sulfurous acid, octyl 2-pentyl ester  
Formula C<sub>13</sub>H<sub>28</sub>O<sub>3</sub>S, MW 264, CAS# NA, Entry# 35068

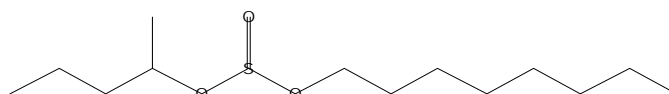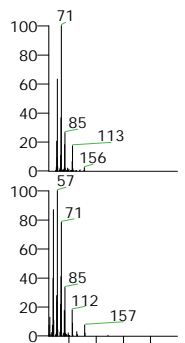

NL: 9.99E2  
6335 5.13 1 11 22  
310-320 350-360  
2.94E8 + c EI Full ms  
[50.00-500.00]  
  
NL: 9.99E2  
SI 869, RSI 901, mainlib,  
Entry# 22518, CAS# NA,  
Oxalic acid, 2-ethylhexyl  
isohexyl ester

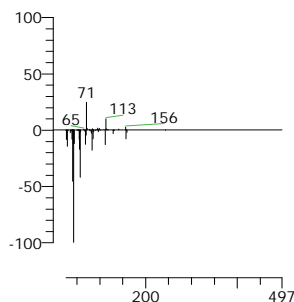

Oxalic acid, 2-ethylhexyl isohexyl ester  
Formula C<sub>16</sub>H<sub>30</sub>O<sub>4</sub>, MW 286, CAS# NA, Entry# 22518

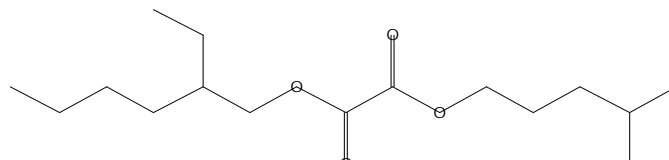



## Hit Spectrum

## Delta

## Compound Structure

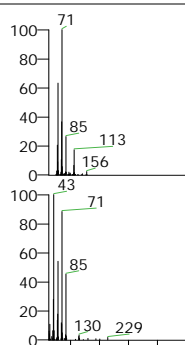

NL: 9.99E2  
6335 5.13 1 11 22  
310-320 350-360  
2.94E8 + c EI Full ms  
[50.00-500.00]

NL: 9.99E2  
SI 789, RSI 899,  
mainlib, Entry# 8386,  
CAS# NA, Oxalic acid,  
isohexyl neopentyl ester

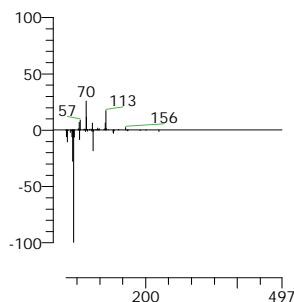

Oxalic acid, isohexyl neopentyl ester  
Formula C13H24O4, MW 244, CAS# NA, Entry# 8386

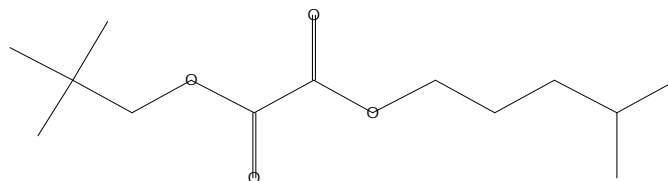

| RT   | Compound Name                         | Area       | Area % | RSI | Cas #      | Library |
|------|---------------------------------------|------------|--------|-----|------------|---------|
| 5.13 | Oxalic acid, 2-ethylhexyl hexyl ester | 2927178767 | 1.55   | 920 | NA         | mainlib |
| 5.13 | Dodecane, 4,6-dimethyl-               | 2927178767 | 1.55   | 912 | 61141-72-8 | mainlib |
| 5.13 | Sulfurous acid, octyl 2-pentyl ester  | 2927178767 | 1.55   | 906 | NA         | mainlib |

Analysed By:

Checked By:

## Hit Spectrum

## Delta

## Compound Structure

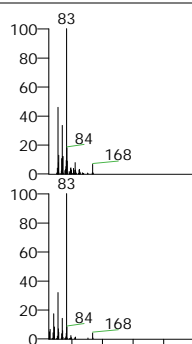

NL: 9.98E2  
6547 5.86 1 11 22  
522-532 562-572  
2.25E8 + c EI Full ms  
[50.00-500.00]

NL: 9.99E2  
SI 815, RSI 902,  
mainlib, Entry# 47458,  
CAS# 74421-03-7,  
2-Decene, 2,4-dimethyl-

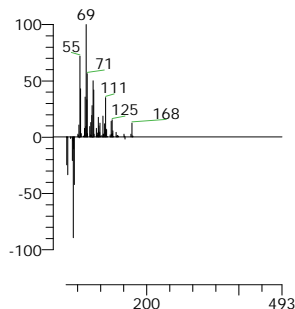

2-Decene, 2,4-dimethyl-  
Formula C<sub>12</sub>H<sub>24</sub>, MW 168, CAS# 74421-03-7, Entry# 47458  
2,4-Dimethyl-2-decene #

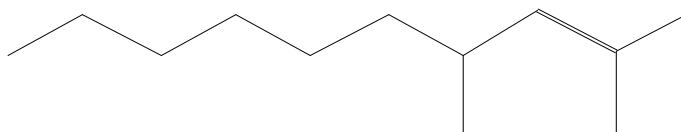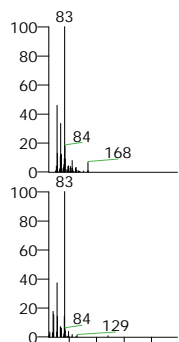

NL: 9.98E2  
6547 5.86 1 11 22  
522-532 562-572  
2.25E8 + c EI Full ms  
[50.00-500.00]

NL: 9.99E2  
SI 720, RSI 902, mainlib,  
Entry# 47440, CAS# NA,  
Oxalic acid, cyclohexyl  
tetradecyl ester

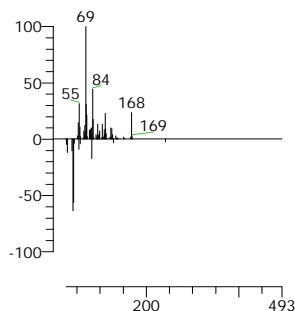

Oxalic acid, cyclohexyl tetradecyl ester  
Formula C<sub>22</sub>H<sub>40</sub>O<sub>4</sub>, MW 368, CAS# NA, Entry# 47440

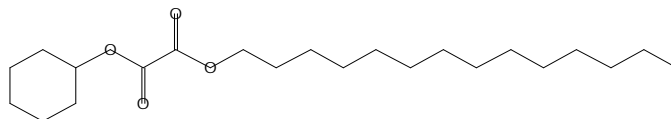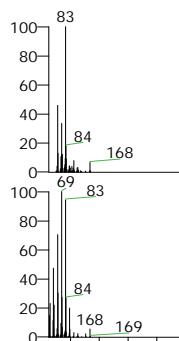

NL: 9.98E2  
6547 5.86 1 11 22  
522-532 562-572  
2.25E8 + c EI Full ms  
[50.00-500.00]

NL: 9.99E2  
SI 835, RSI 887,  
mainlib, Entry# 32517,  
CAS# 55499-02-0,  
3-Decene, 2,2-dimethyl-,  
(E)-

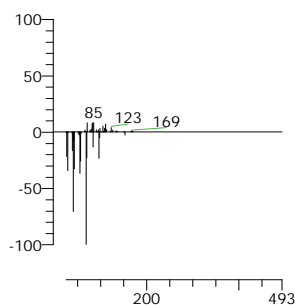

3-Decene, 2,2-dimethyl-, (E)-  
Formula C<sub>12</sub>H<sub>24</sub>, MW 168, CAS# 55499-02-0, Entry# 32517  
trans-2,2-Dimethyl-3-Decene

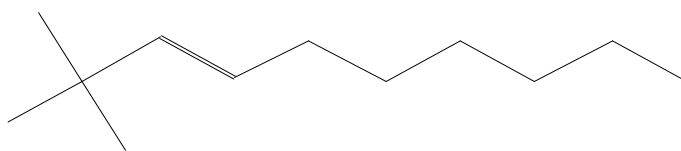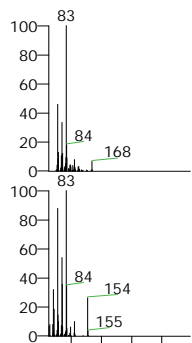

NL: 9.98E2  
6547 5.86 1 11 22  
522-532 562-572  
2.25E8 + c EI Full ms  
[50.00-500.00]

NL: 9.99E2  
SI 795, RSI 857,  
mainlib, Entry# 47580,  
CAS# 33933-75-4,  
2-Octene,  
2,3,7-trimethyl-

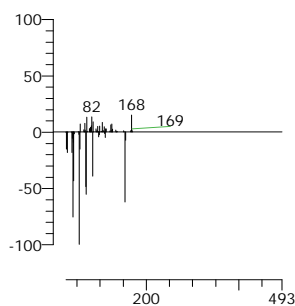

2-Octene, 2,3,7-trimethyl-  
Formula C<sub>11</sub>H<sub>22</sub>, MW 154, CAS# 33933-75-4, Entry# 47580  
2,3,7-Trimethyl-2-octene

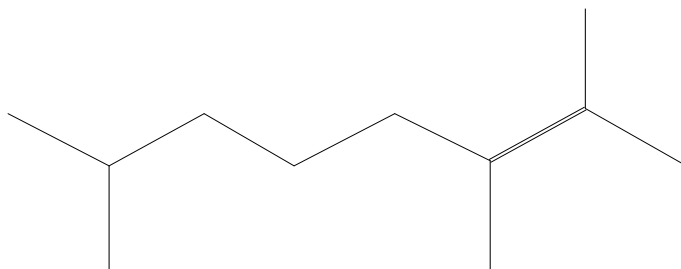

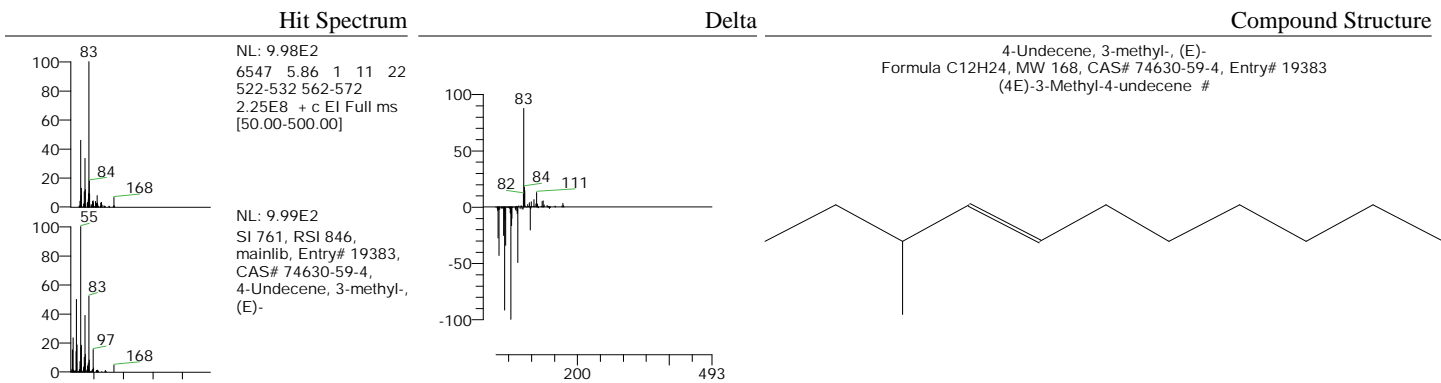

| RT   | Compound Name                            | Area       | Area % | RSI | Cas #      | Library |
|------|------------------------------------------|------------|--------|-----|------------|---------|
| 5.86 | Oxalic acid, cyclohexyl tetradecyl ester | 3036413349 | 1.61   | 902 | NA         | mainlib |
| 5.86 | 2-Decene, 2,4-dimethyl-                  | 3036413349 | 1.61   | 902 | 74421-03-7 | mainlib |
| 5.86 | 3-Decene, 2,2-dimethyl-, (E)-            | 3036413349 | 1.61   | 887 | 55499-02-0 | mainlib |

## Hit Spectrum

## Delta

## Compound Structure

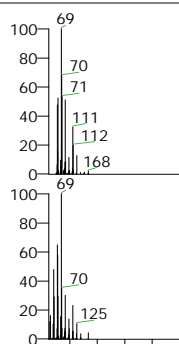

NL: 9.99E2  
6644 6.18 1 11 22  
619-629 659-669  
2.46E8 + c EI Full ms  
[50.00-500.00]

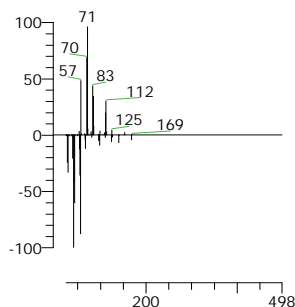

Cyclopentane, 1-butyl-2-propyl-  
Formula C<sub>12</sub>H<sub>24</sub>, MW 168, CAS# 62199-50-2, Entry# 32071  
1-Butyl-2-propylcyclopentane #

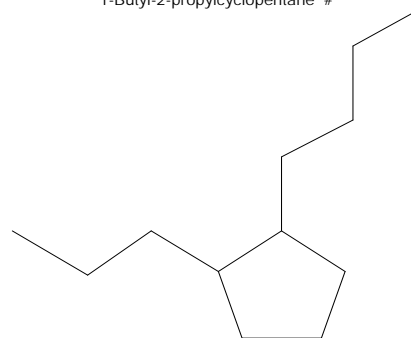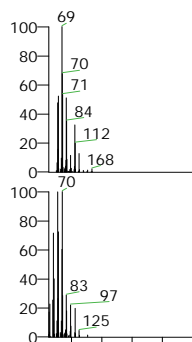

NL: 9.99E2  
6644 6.18 1 11 22  
619-629 659-669  
2.46E8 + c EI Full ms  
[50.00-500.00]

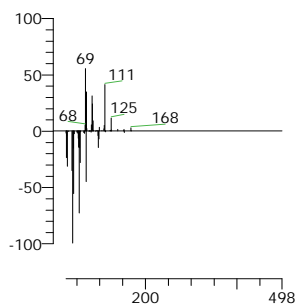

5-Ethyl-1-nonene  
Formula C<sub>11</sub>H<sub>22</sub>, MW 154, CAS# 19780-74-6, Entry# 34087

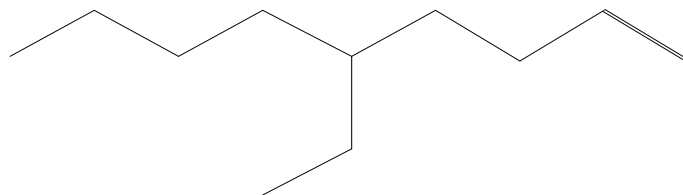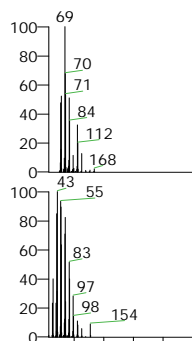

NL: 9.99E2  
6644 6.18 1 11 22  
619-629 659-669  
2.46E8 + c EI Full ms  
[50.00-500.00]

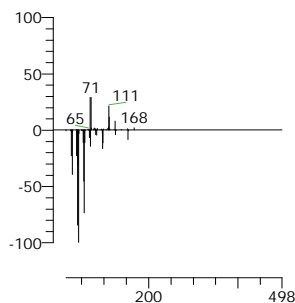

1-Undecene  
Formula C<sub>11</sub>H<sub>22</sub>, MW 154, CAS# 821-95-4, Entry# 6823  
n-1-Undecene

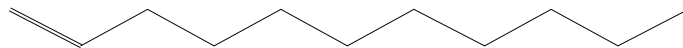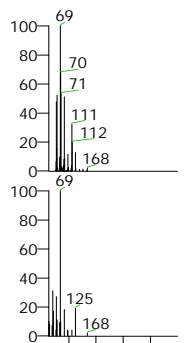

NL: 9.99E2  
6644 6.18 1 11 22  
619-629 659-669  
2.46E8 + c EI Full ms  
[50.00-500.00]

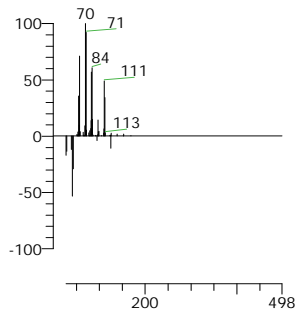

4-Nonene, 2,3,3-trimethyl-, (Z)-  
Formula C<sub>12</sub>H<sub>24</sub>, MW 168, CAS# 63830-68-2, Entry# 31390  
(4Z)-2,3,3-Trimethyl-4-nonene #

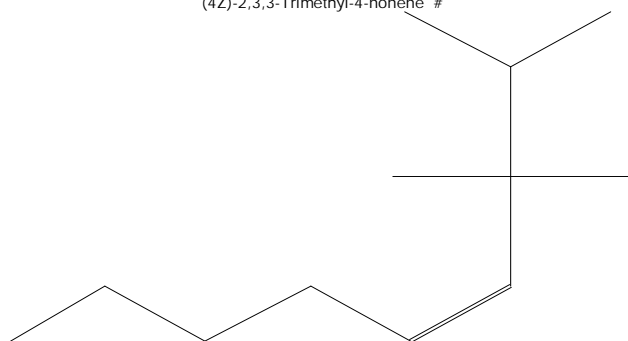

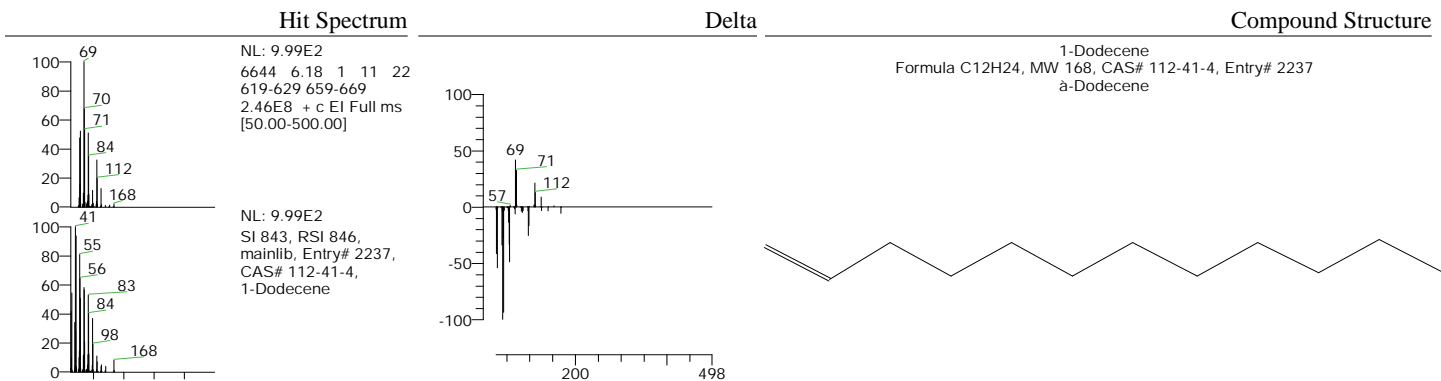

| RT   | Compound Name                   | Area       | Area % | RSI | Cas #      | Library |
|------|---------------------------------|------------|--------|-----|------------|---------|
| 6.18 | Cyclopentane, 1-butyl-2-propyl- | 7462185391 | 3.95   | 874 | 62199-50-2 | mainlib |
| 6.18 | 5-Ethyl-1-nonene                | 7462185391 | 3.95   | 863 | 19780-74-6 | mainlib |
| 6.18 | 1-Undecene                      | 7462185391 | 3.95   | 861 | 821-95-4   | mainlib |

## Hit Spectrum

## Delta

## Compound Structure

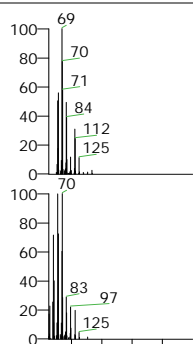

NL: 9.99E2  
6662 6.25 1 11 22  
637-647 677-687  
2.28E8 + c EI Full ms  
[50.00-500.00]

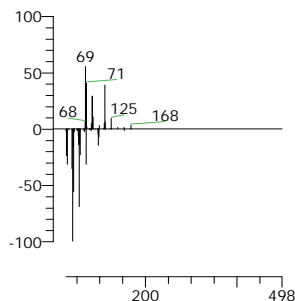

5-Ethyl-1-nonene  
Formula C<sub>11</sub>H<sub>22</sub>, MW 154, CAS# 19780-74-6, Entry# 34087

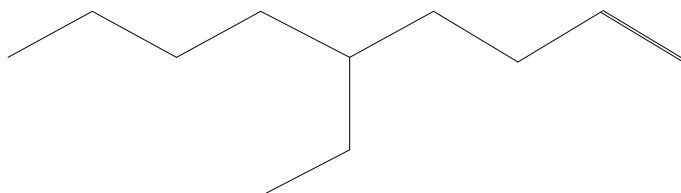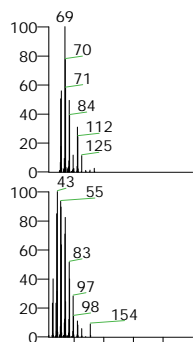

NL: 9.99E2  
6662 6.25 1 11 22  
637-647 677-687  
2.28E8 + c EI Full ms  
[50.00-500.00]

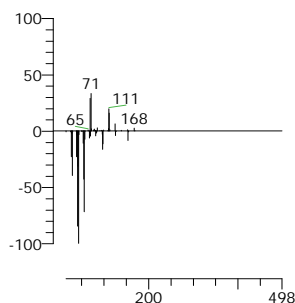

1-Undecene  
Formula C<sub>11</sub>H<sub>22</sub>, MW 154, CAS# 821-95-4, Entry# 6823  
n-1-Undecene

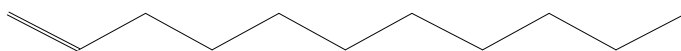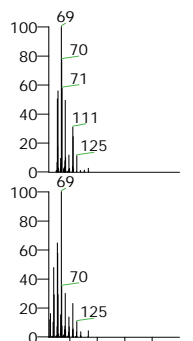

NL: 9.99E2  
6662 6.25 1 11 22  
637-647 677-687  
2.28E8 + c EI Full ms  
[50.00-500.00]

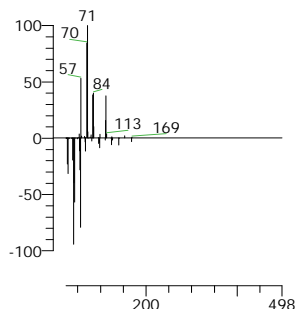

Cyclopentane, 1-butyl-2-propyl-  
Formula C<sub>12</sub>H<sub>24</sub>, MW 168, CAS# 62199-50-2, Entry# 32071  
1-Butyl-2-propylcyclopentane #

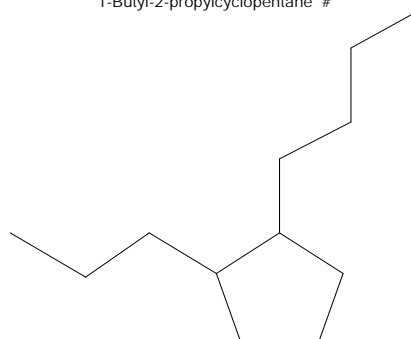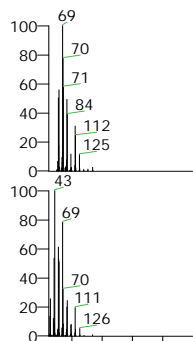

NL: 9.99E2  
6662 6.25 1 11 22  
637-647 677-687  
2.28E8 + c EI Full ms  
[50.00-500.00]

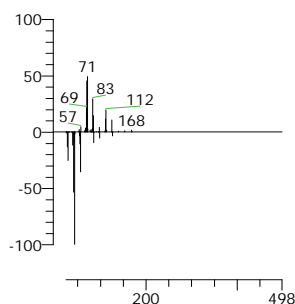

1-Undecene, 7-methyl-  
Formula C<sub>12</sub>H<sub>24</sub>, MW 168, CAS# 74630-42-5, Entry# 8073  
7-Methyl-1-undecene #

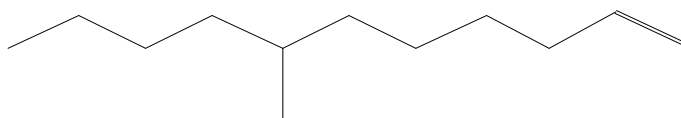

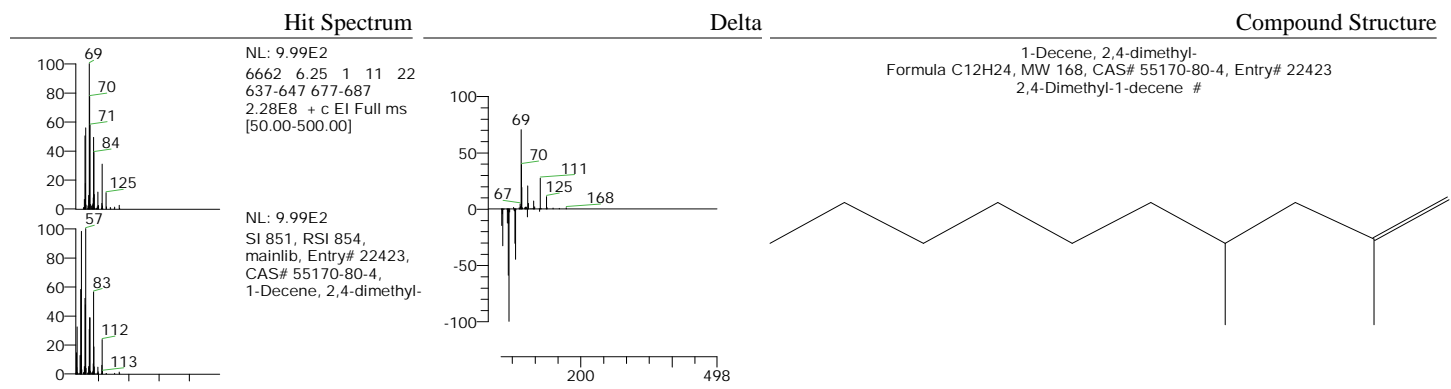

| RT   | Compound Name                   | Area       | Area % | RSI | Cas #      | Library |
|------|---------------------------------|------------|--------|-----|------------|---------|
| 6.25 | 5-Ethyl-1-nonene                | 5786939639 | 3.06   | 868 | 19780-74-6 | mainlib |
| 6.25 | 1-Undecene                      | 5786939639 | 3.06   | 865 | 821-95-4   | mainlib |
| 6.25 | Cyclopentane, 1-butyl-2-propyl- | 5786939639 | 3.06   | 864 | 62199-50-2 | mainlib |

## Hit Spectrum

## Delta

## Compound Structure

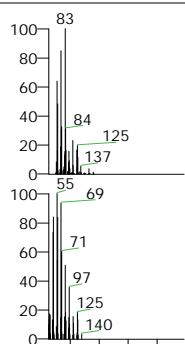

NL: 9.99E2  
6845 6.87 1 11 22  
820-830 860-870  
1.55E8 + c EI Full ms  
[50.00-500.00]

NL: 9.99E2  
SI 836, RSI 888,  
mainlib, Entry# 18829,  
CAS# 6750-34-1,  
1-Dodecanol,  
3,7,11-trimethyl-

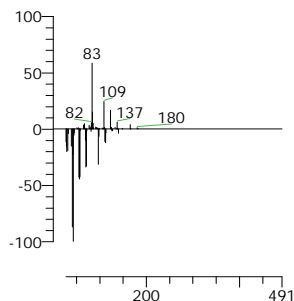

1-Dodecanol, 3,7,11-trimethyl-  
Formula C15H32O, MW 228, CAS# 6750-34-1, Entry# 18829  
Hexa-hydro-farnesol

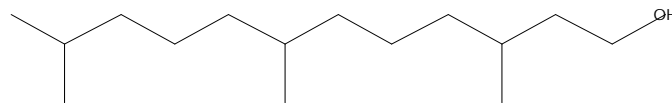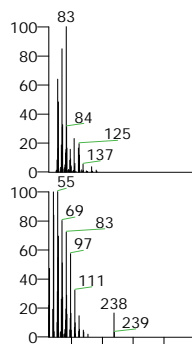

NL: 9.99E2  
6845 6.87 1 11 22  
820-830 860-870  
1.55E8 + c EI Full ms  
[50.00-500.00]

NL: 9.99E2  
SI 780, RSI 864,  
mainlib, Entry# 17830,  
CAS# 2579-04-6,  
8-Heptadecene

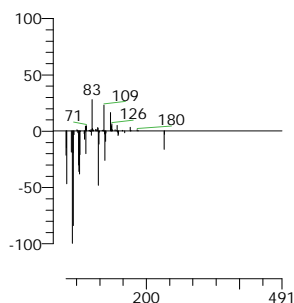

8-Heptadecene  
Formula C17H34, MW 238, CAS# 2579-04-6, Entry# 17830  
(8E)-8-Heptadecene #

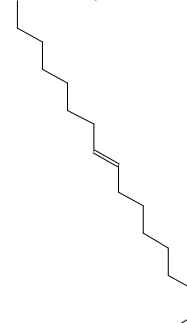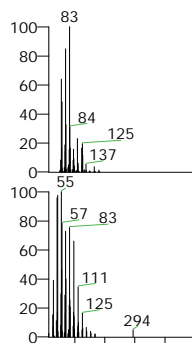

NL: 9.99E2  
6845 6.87 1 11 22  
820-830 860-870  
1.55E8 + c EI Full ms  
[50.00-500.00]

NL: 9.99E2  
SI 805, RSI 860,  
mainlib, Entry# 18363,  
CAS# 95008-11-0,  
10-Heneicosene (c,t)

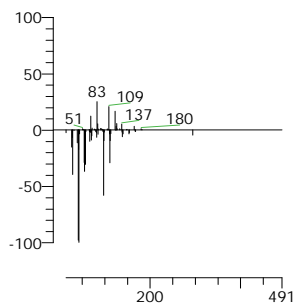

10-Heneicosene (c,t)  
Formula C21H42, MW 294, CAS# 95008-11-0, Entry# 18363  
(10E)-10-Henicosenes #

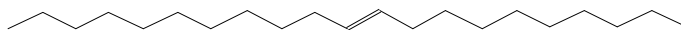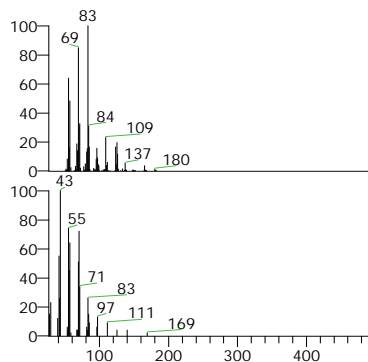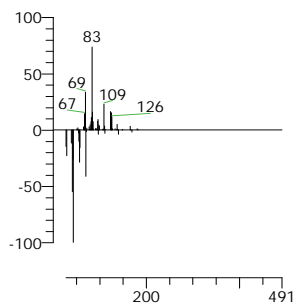

Acetic acid, trifluoro-, 3,7-dimethyloctyl ester  
Formula C12H21F3O2, MW 254, CAS# 28745-07-5, Entry# 6926  
Trifluoroacetyl-3,7-dimethyloctanol

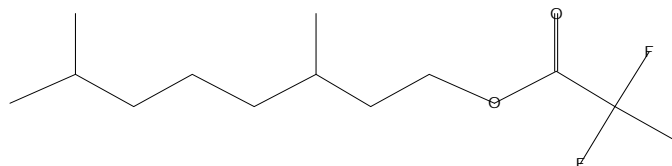



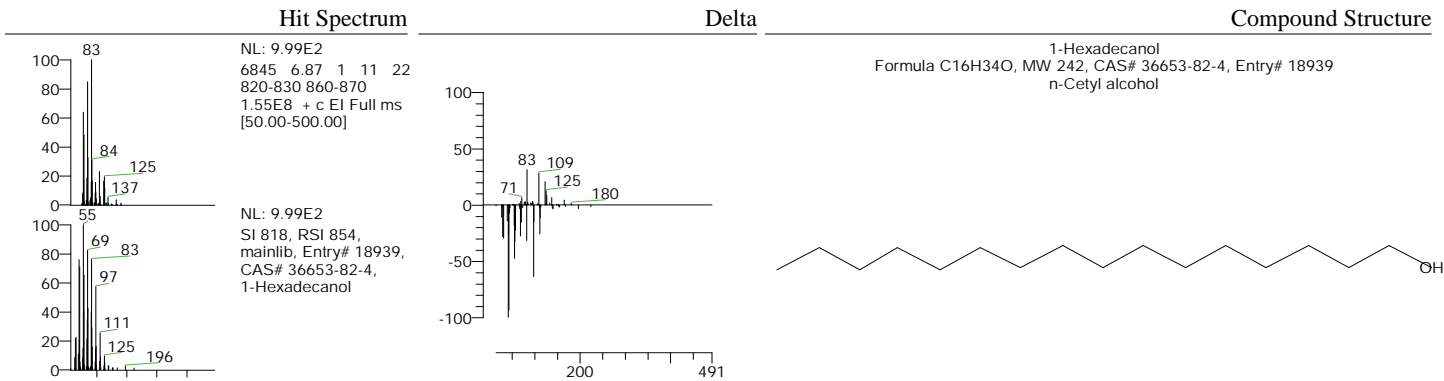

| RT   | Compound Name                  | Area       | Area % | RSI | Cas #      | Library |
|------|--------------------------------|------------|--------|-----|------------|---------|
| 6.87 | 1-Dodecanol, 3,7,11-trimethyl- | 4548856556 | 2.41   | 888 | 6750-34-1  | mainlib |
| 6.87 | 8-Heptadecene                  | 4548856556 | 2.41   | 864 | 2579-04-6  | mainlib |
| 6.87 | 10-Heneicosene (c,t)           | 4548856556 | 2.41   | 860 | 95008-11-0 | mainlib |

## Hit Spectrum

## Delta

## Compound Structure

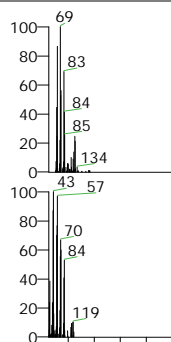

NL: 9.99E2  
6871 6.96 1 11 22  
846-856 886-896 6.66E7  
+ c EI Full ms  
[50.00-500.00]

NL: 9.99E2  
SI 797, RSI 895, mainlib,  
Entry# 7246, CAS#  
16958-78-4, Acetic acid,  
trichloro-, octyl ester

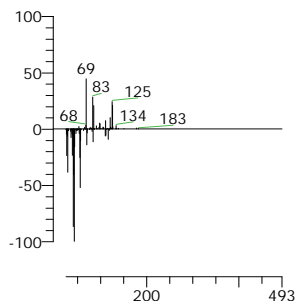

Acetic acid, trichloro-, octyl ester  
Formula C<sub>10</sub>H<sub>17</sub>Cl<sub>3</sub>O<sub>2</sub>, MW 274, CAS# 16958-78-4, Entry# 7246  
Trichloroacetic acid, octyl ester

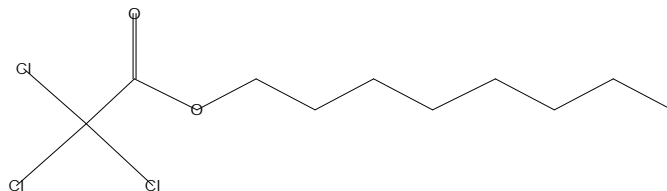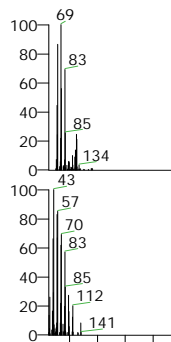

NL: 9.99E2  
6871 6.96 1 11 22  
846-856 886-896  
6.66E7 + c EI Full ms  
[50.00-500.00]

NL: 9.99E2  
SI 765, RSI 892, mainlib,  
Entry# 7338, CAS#  
83005-00-9,  
Dichloroacetic acid,  
decyl ester

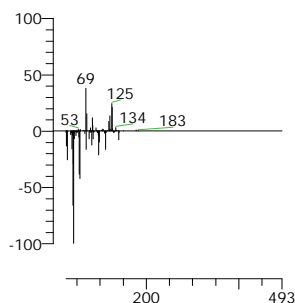

Dichloroacetic acid, decyl ester  
Formula C<sub>12</sub>H<sub>22</sub>Cl<sub>2</sub>O<sub>2</sub>, MW 268, CAS# 83005-00-9, Entry# 7338  
Decyl dichloroacetate #

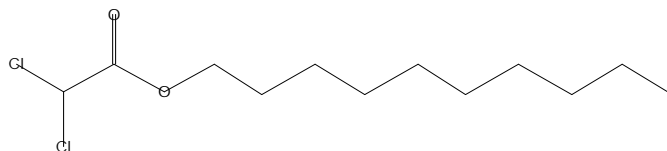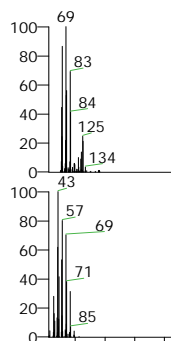

NL: 9.99E2  
6871 6.96 1 11 22  
846-856 886-896  
6.66E7 + c EI Full ms  
[50.00-500.00]

NL: 9.99E2  
SI 734, RSI 892,  
mainlib, Entry# 7393,  
CAS# 20633-13-0,  
Nitric acid, nonyl ester

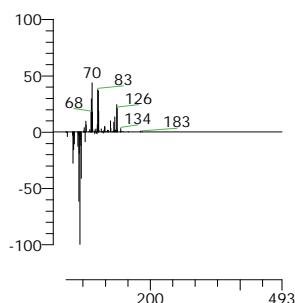

Nitric acid, nonyl ester  
Formula C<sub>9</sub>H<sub>19</sub>NO<sub>3</sub>, MW 189, CAS# 20633-13-0, Entry# 7393  
n-Nonyl nitrate

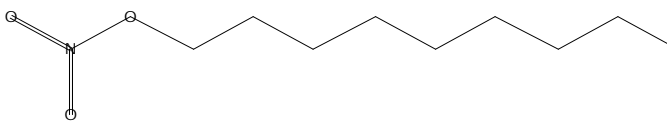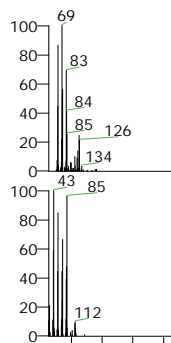

NL: 9.99E2  
6871 6.96 1 11 22  
846-856 886-896  
6.66E7 + c EI Full ms  
[50.00-500.00]

NL: 9.99E2  
SI 740, RSI 888,  
mainlib, Entry# 9315,  
CAS# 17071-54-4,  
Hexyl octyl ether

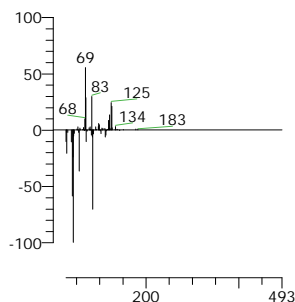

Hexyl octyl ether  
Formula C<sub>14</sub>H<sub>30</sub>O, MW 214, CAS# 17071-54-4, Entry# 9315  
1-(Hexyloxy)octane #

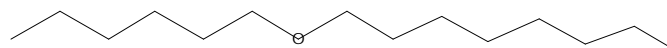

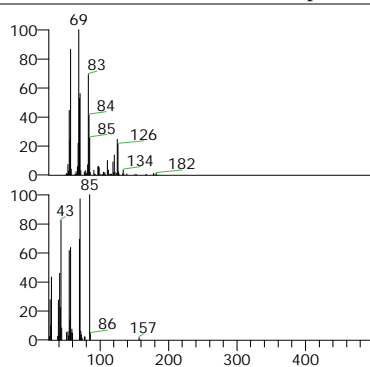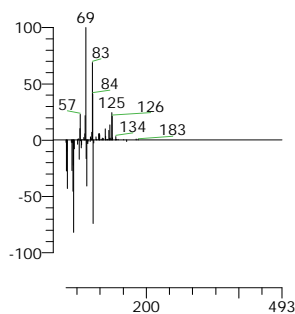

Pentanoic acid, 1,1-dimethylpropyl ester  
 Formula C<sub>10</sub>H<sub>20</sub>O<sub>2</sub>, MW 172, CAS# 117421-32-6, Entry# 50135  
 tert-Pentyl pentanoate #

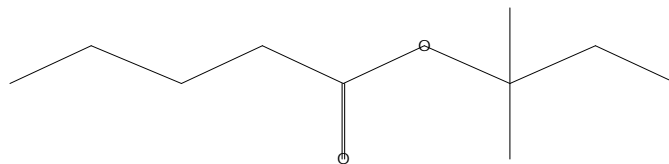

| RT   | Compound Name                        | Area       | Area % | RSI | Cas #      | Library |
|------|--------------------------------------|------------|--------|-----|------------|---------|
| 6.96 | Acetic acid, trichloro-, octyl ester | 1346835308 | 0.71   | 895 | 16958-78-4 | mainlib |
| 6.96 | Nitric acid, nonyl ester             | 1346835308 | 0.71   | 892 | 20633-13-0 | mainlib |
| 6.96 | Dichloroacetic acid, decyl ester     | 1346835308 | 0.71   | 892 | 83005-00-9 | mainlib |

## Hit Spectrum

## Delta

## Compound Structure

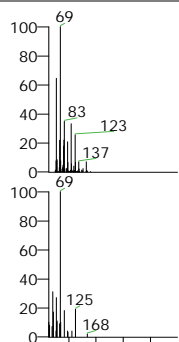

NL: 9.99E2  
6963 7.27 1 11 22  
938-948 978-988  
2.62E8 + c EI Full ms  
[50.00-500.00]

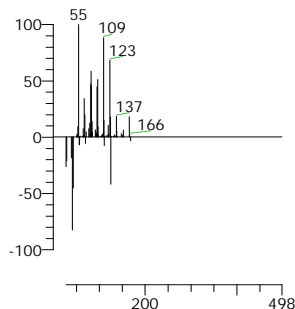

4-Nonene, 2,3,3-trimethyl-, (Z)-  
Formula C<sub>12</sub>H<sub>24</sub>, MW 168, CAS# 63830-68-2, Entry# 31390  
(4Z)-2,3,3-Trimethyl-4-nonene #

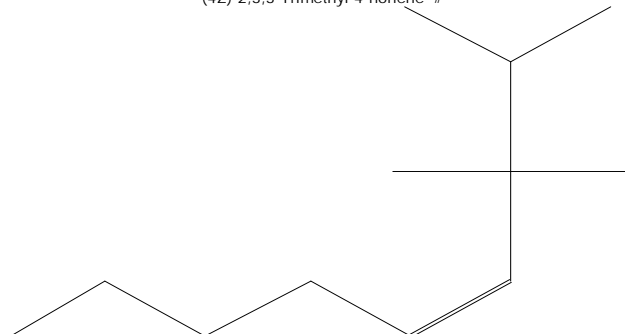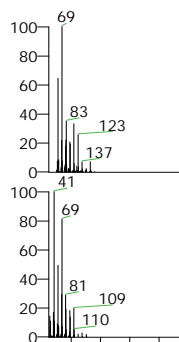

NL: 9.99E2  
6963 7.27 1 11 22  
938-948 978-988  
2.62E8 + c EI Full ms  
[50.00-500.00]

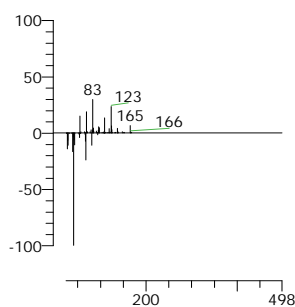

1,7-Nonadiene, 4,8-dimethyl-  
Formula C<sub>11</sub>H<sub>20</sub>, MW 152, CAS# 62108-28-5, Entry# 3173  
4,8-Dimethyl-1,7-nonadiene

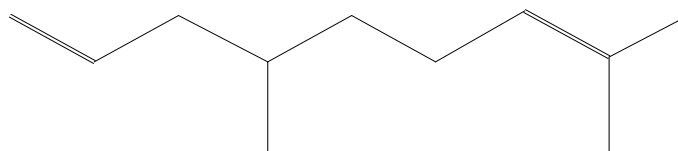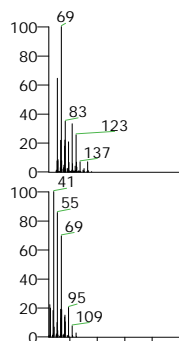

NL: 9.99E2  
6963 7.27 1 11 22  
938-948 978-988  
2.62E8 + c EI Full ms  
[50.00-500.00]

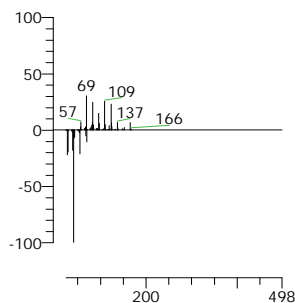

1,4-Heptadiene, 3,3,6-trimethyl-  
Formula C<sub>10</sub>H<sub>18</sub>, MW 138, CAS# 74498-89-8, Entry# 2640  
(4E)-3,3,6-Trimethyl-1,4-heptadiene #

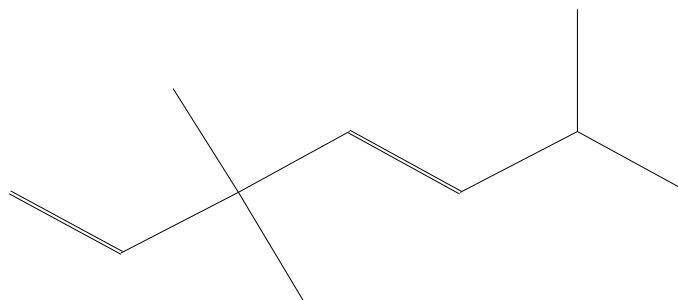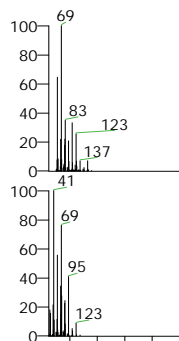

NL: 9.99E2  
6963 7.27 1 11 22  
938-948 978-988  
2.62E8 + c EI Full ms  
[50.00-500.00]

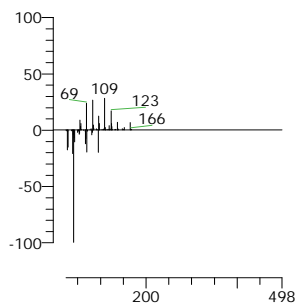

1,6-Heptadiene, 2,5,5-trimethyl-  
Formula C<sub>10</sub>H<sub>18</sub>, MW 138, CAS# 62238-28-2, Entry# 3166  
2,5,5-Trimethyl-1,6-heptadiene #

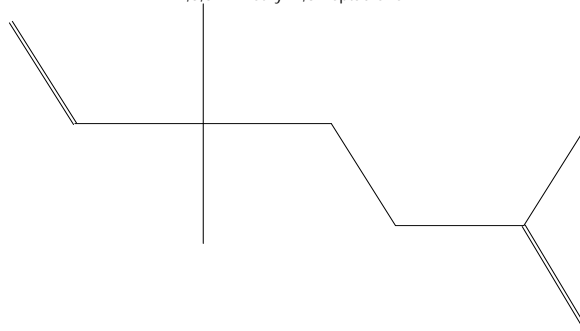

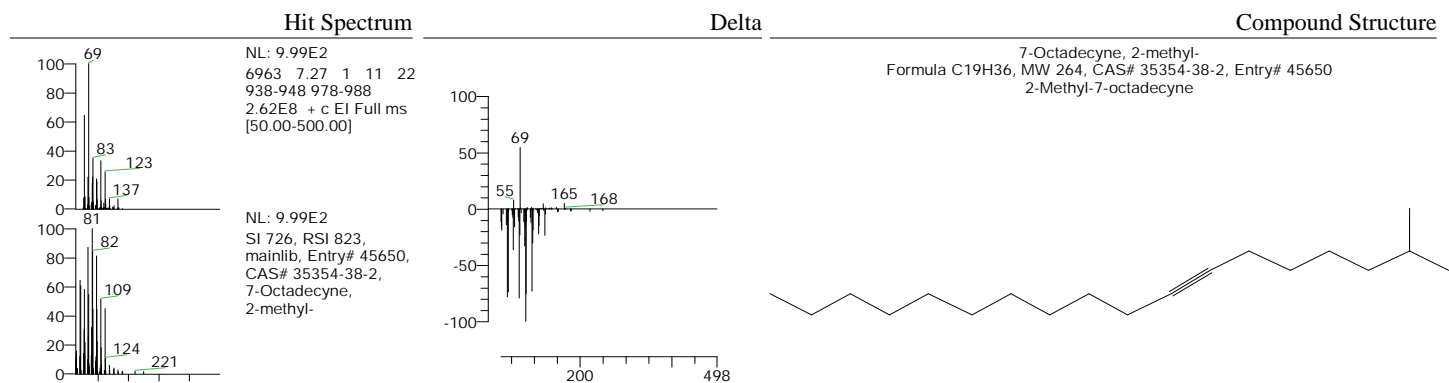

| RT   | Compound Name                    | Area       | Area % | RSI | Cas #      | Library |
|------|----------------------------------|------------|--------|-----|------------|---------|
| 7.27 | 4-Nonene, 2,3,3-trimethyl-, (Z)- | 6206082993 | 3.29   | 865 | 63830-68-2 | mainlib |
| 7.27 | 1,7-Nonadiene, 4,8-dimethyl-     | 6206082993 | 3.29   | 861 | 62108-28-5 | mainlib |
| 7.27 | 1,4-Heptadiene, 3,3,6-trimethyl- | 6206082993 | 3.29   | 842 | 74498-89-8 | mainlib |

## Hit Spectrum

## Delta

## Compound Structure

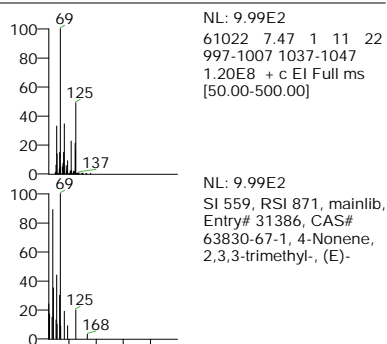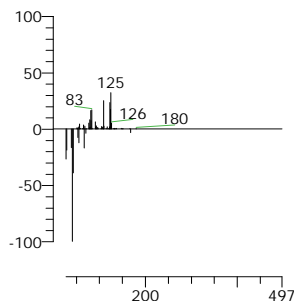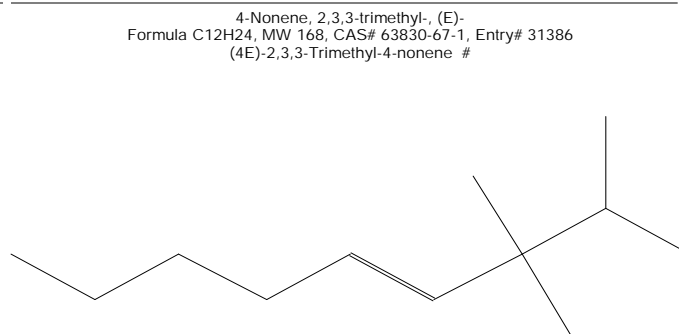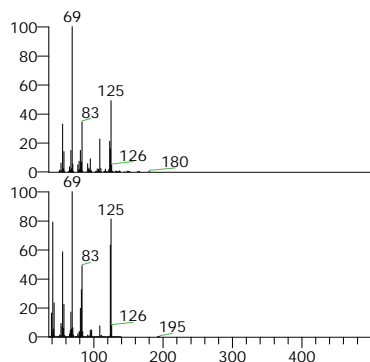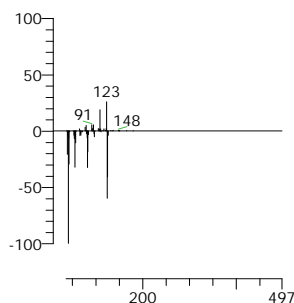

Cyclohexane, 1,1'-(1-methylethylidene)bis-  
Formula C<sub>15</sub>H<sub>28</sub>, MW 208, CAS# 54934-90-6, Entry# 33080  
2,2-Dicyclohexylpropane

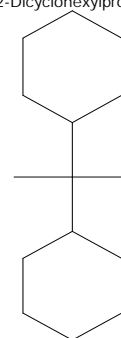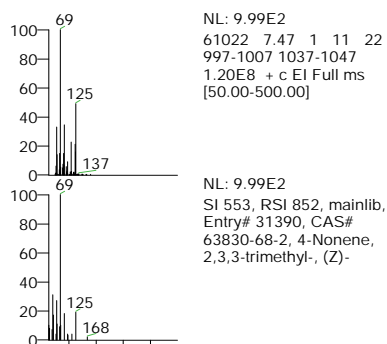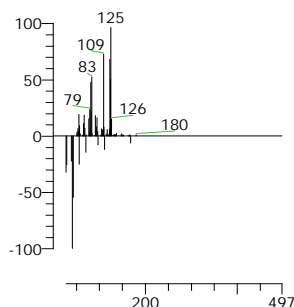

4-Nonene, 2,3,3-trimethyl-, (Z)-  
Formula C<sub>12</sub>H<sub>24</sub>, MW 168, CAS# 63830-68-2, Entry# 31390  
(4Z)-2,3,3-Trimethyl-4-nonene #

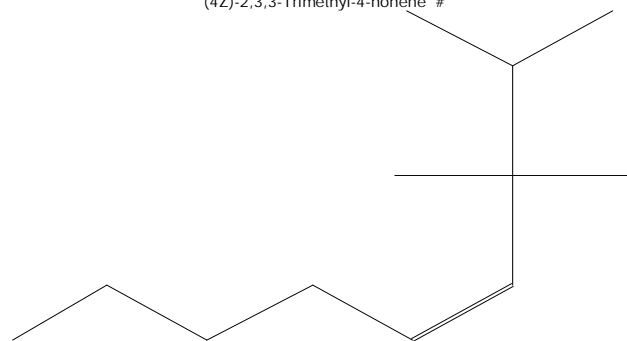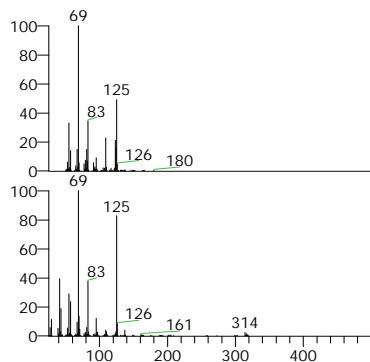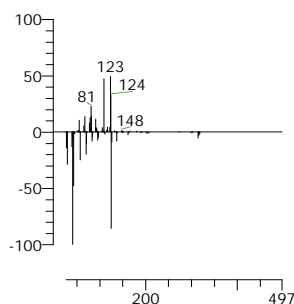

Zinc, bis[2-(1,1-dimethylethyl)-3,3-dimethylcyclopropyl]-, [1a(1R\*,2R\*),2a]-  
Formula C<sub>18</sub>H<sub>34</sub>Zn, MW 314, CAS# 74793-36-5, Entry# 33081  
Bis(3-tert-butyl-2,2-dimethylcyclopropyl)zinc #

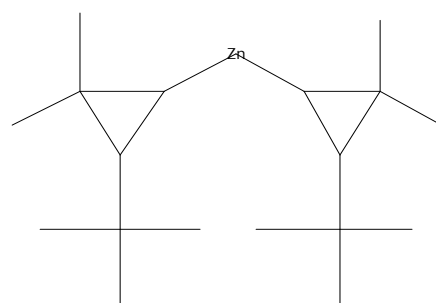

## Hit Spectrum

## Delta

## Compound Structure

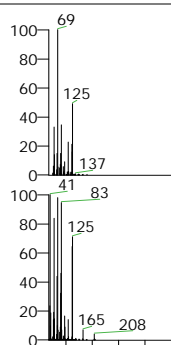

NL: 9.99E2  
61022 7.47 1 11 22  
997-1007 1037-1047  
1.20E8 + c EI Full ms  
[50.00-500.00]

NL: 9.99E2  
SI 832, RSI 835, mainlib,  
Entry# 3233, CAS#  
54934-89-3,  
1,1'-Bicyclohexyl,  
2-propyl-, trans-

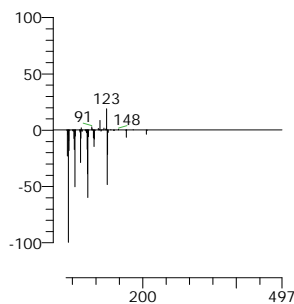

1,1'-Bicyclohexyl, 2-propyl-, trans-  
Formula C15H28, MW 208, CAS# 54934-89-3, Entry# 3233

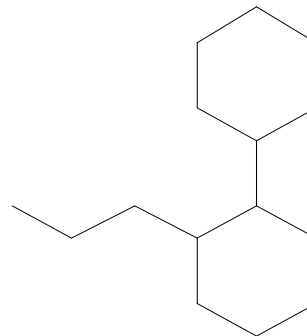

| RT   | Compound Name                              | Area       | Area % | RSI | Cas #      | Library |
|------|--------------------------------------------|------------|--------|-----|------------|---------|
| 7.47 | 4-Nonene, 2,3,3-trimethyl-, (E)-           | 1581096360 | 0.84   | 871 | 63830-67-1 | mainlib |
| 7.47 | Cyclohexane, 1,1'-(1-methylethylidene)bis- | 1581096360 | 0.84   | 858 | 54934-90-6 | mainlib |
| 7.47 | 4-Nonene, 2,3,3-trimethyl-, (Z)-           | 1581096360 | 0.84   | 852 | 63830-68-2 | mainlib |

## Hit Spectrum

## Delta

## Compound Structure

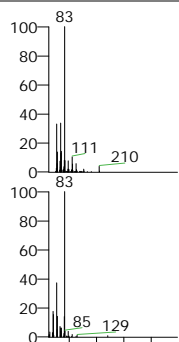

NL: 9.99E2  
61478 9.03 1 11 22  
1453-1463 1493-1503  
3.62E8 + c EI Full ms  
[50.00-500.00]

NL: 9.99E2  
SI 785, RSI 884, mainlib,  
Entry# 47440, CAS# NA,  
Oxalic acid, cyclohexyl  
tetradecyl ester

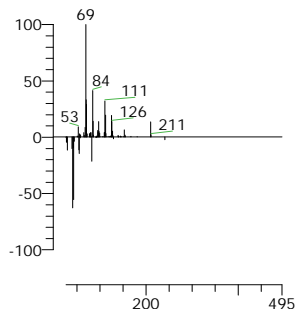

Oxalic acid, cyclohexyl tetradecyl ester  
Formula C22H40O4, MW 368, CAS# NA, Entry# 47440

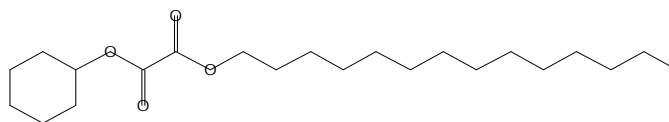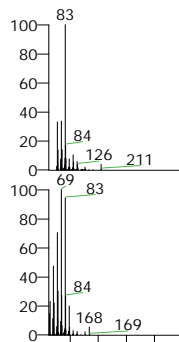

NL: 9.99E2  
61478 9.03 1 11 22  
1453-1463 1493-1503  
3.62E8 + c EI Full ms  
[50.00-500.00]

NL: 9.99E2  
SI 852, RSI 878, mainlib,  
Entry# 32517, CAS#  
55499-02-0, 3-Decene,  
2,2-dimethyl-, (E)-

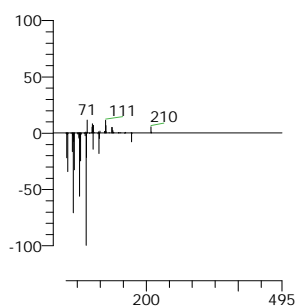

3-Decene, 2,2-dimethyl-, (E)-  
Formula C12H24, MW 168, CAS# 55499-02-0, Entry# 32517  
trans-2,2-Dimethyl-3-Decene

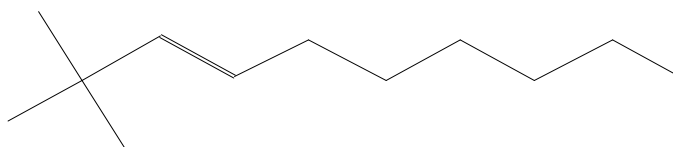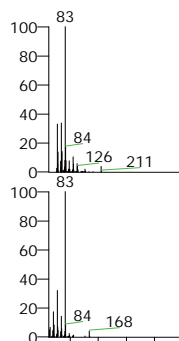

NL: 9.99E2  
61478 9.03 1 11 22  
1453-1463 1493-1503  
3.62E8 + c EI Full ms  
[50.00-500.00]

NL: 9.99E2  
SI 815, RSI 874, mainlib,  
Entry# 47458, CAS#  
74421-03-7, 2-Decene,  
2,4-dimethyl-

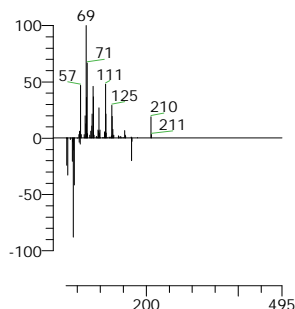

2-Decene, 2,4-dimethyl-  
Formula C12H24, MW 168, CAS# 74421-03-7, Entry# 47458  
2,4-Dimethyl-2-decene #

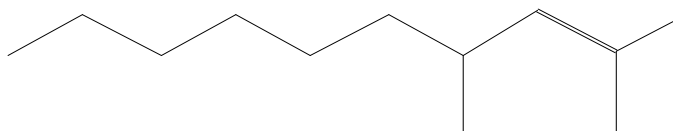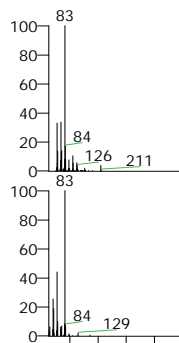

NL: 9.99E2  
61478 9.03 1 11 22  
1453-1463 1493-1503  
3.62E8 + c EI Full ms  
[50.00-500.00]

NL: 9.99E2  
SI 754, RSI 859, mainlib,  
Entry# 47436, CAS# NA,  
Oxalic acid, cyclohexyl  
nonyl ester

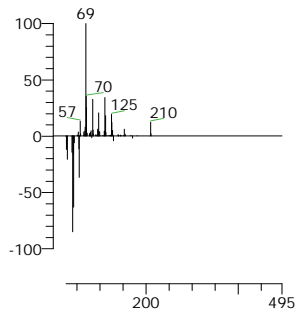

Oxalic acid, cyclohexyl nonyl ester  
Formula C17H30O4, MW 298, CAS# NA, Entry# 47436

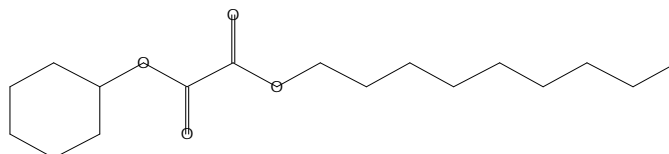



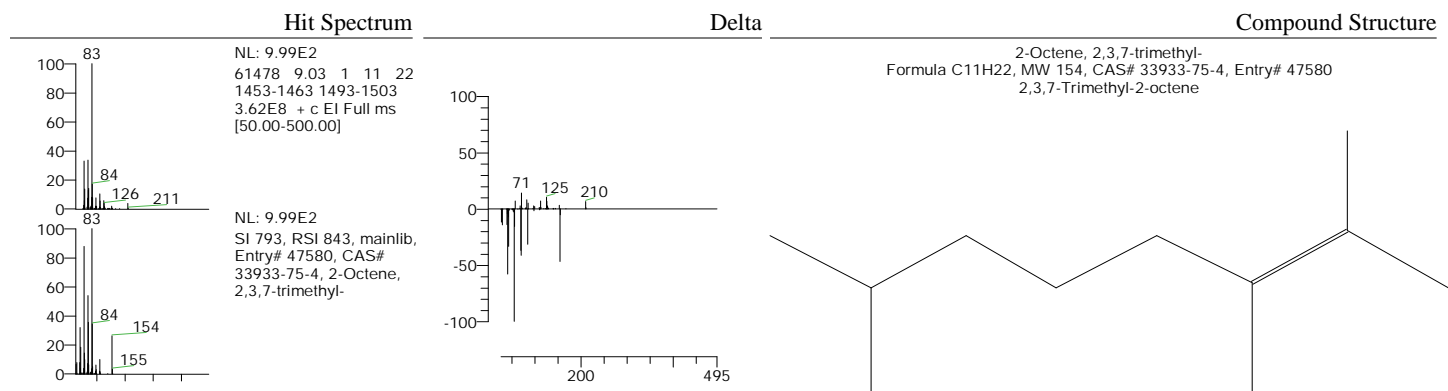

| RT   | Compound Name                            | Area       | Area % | RSI | Cas #      | Library |
|------|------------------------------------------|------------|--------|-----|------------|---------|
| 9.03 | Oxalic acid, cyclohexyl tetradecyl ester | 5844511228 | 3.09   | 884 | NA         | mainlib |
| 9.03 | 3-Decene, 2,2-dimethyl-, (E)-            | 5844511228 | 3.09   | 878 | 55499-02-0 | mainlib |
| 9.03 | 2-Decene, 2,4-dimethyl-                  | 5844511228 | 3.09   | 874 | 74421-03-7 | mainlib |

Analysed By:

Checked By:

## Hit Spectrum

## Delta

## Compound Structure

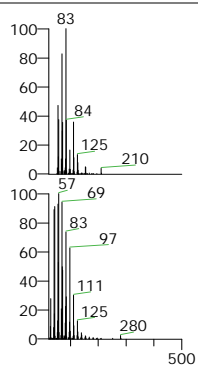

NL: 9.99E2  
61599 9.44 1 11 22  
1574-1584 1614-1624  
2.55E8 + c EI Full ms  
[50.00-500.00]

NL: 9.99E2  
SI 875, RSI 893, mainlib,  
Entry# 23390, CAS#  
74685-33-9, 3-Eicosene,  
(E)-

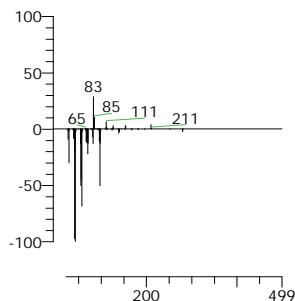

3-Eicosene, (E)-  
Formula C<sub>20</sub>H<sub>40</sub>, MW 280, CAS# 74685-33-9, Entry# 23390  
(3E)-3-Icosene #

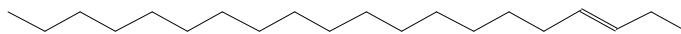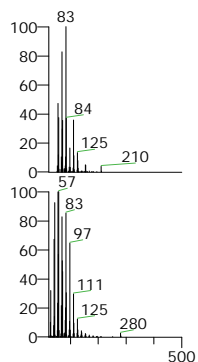

NL: 9.99E2  
61599 9.44 1 11 22  
1574-1584 1614-1624  
2.55E8 + c EI Full ms  
[50.00-500.00]

NL: 9.99E2  
SI 863, RSI 881, mainlib,  
Entry# 23002, CAS#  
74685-29-3, 9-Eicosene,  
(E)-

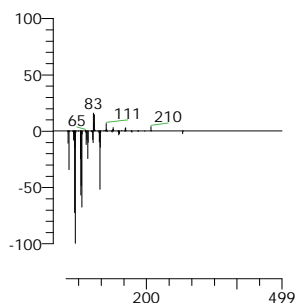

9-Eicosene, (E)-  
Formula C<sub>20</sub>H<sub>40</sub>, MW 280, CAS# 74685-29-3, Entry# 23002  
(9E)-9-Icosene #

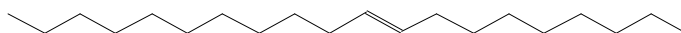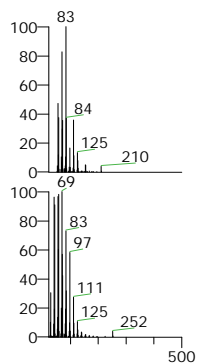

NL: 9.99E2  
61599 9.44 1 11 22  
1574-1584 1614-1624  
2.55E8 + c EI Full ms  
[50.00-500.00]

NL: 9.99E2  
SI 870, RSI 880, mainlib,  
Entry# 32223, CAS#  
7206-19-1,  
3-Octadecene, (E)-

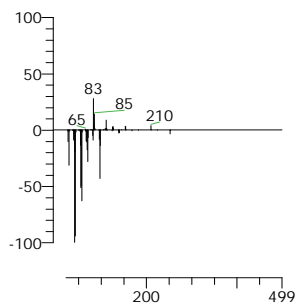

3-Octadecene, (E)-  
Formula C<sub>18</sub>H<sub>36</sub>, MW 252, CAS# 7206-19-1, Entry# 32223  
(3E)-3-Octadecene

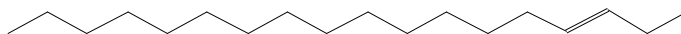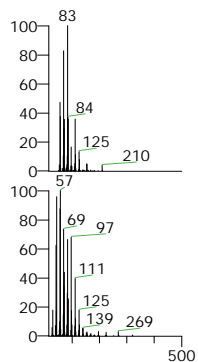

NL: 9.99E2  
61599 9.44 1 11 22  
1574-1584 1614-1624  
2.55E8 + c EI Full ms  
[50.00-500.00]

NL: 9.99E2  
SI 849, RSI 879, mainlib,  
Entry# 22470, CAS#  
6222-03-3,  
Trifluoroacetoxy  
hexadecane

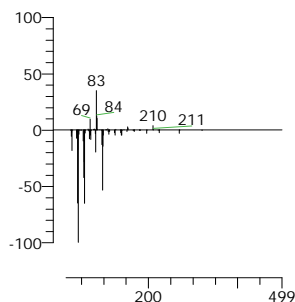

Trifluoroacetoxy hexadecane  
Formula C<sub>18</sub>H<sub>33</sub>F<sub>3</sub>O<sub>2</sub>, MW 338, CAS# 6222-03-3, Entry# 22470  
Hexadecyl trifluoroacetate

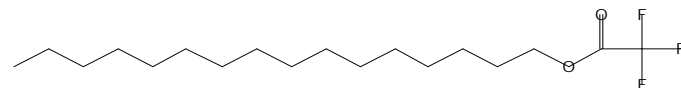

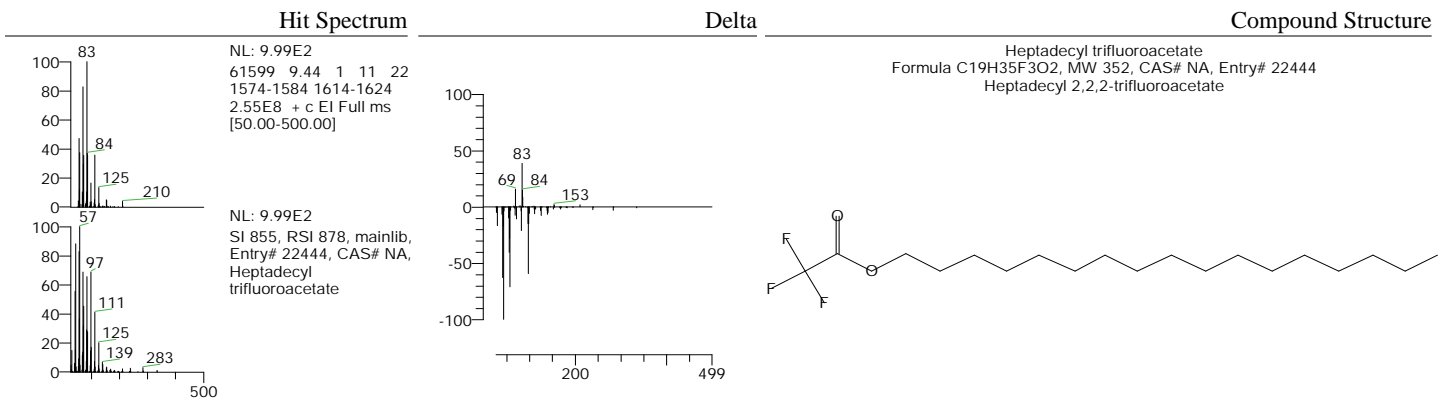

| RT   | Compound Name      | Area        | Area % | RSI | Cas #      | Library |
|------|--------------------|-------------|--------|-----|------------|---------|
| 9.44 | 3-Eicosene, (E)-   | 10653383551 | 5.64   | 893 | 74685-33-9 | mainlib |
| 9.44 | 9-Eicosene, (E)-   | 10653383551 | 5.64   | 881 | 74685-29-3 | mainlib |
| 9.44 | 3-Octadecene, (E)- | 10653383551 | 5.64   | 880 | 7206-19-1  | mainlib |

## Hit Spectrum

## Delta

## Compound Structure

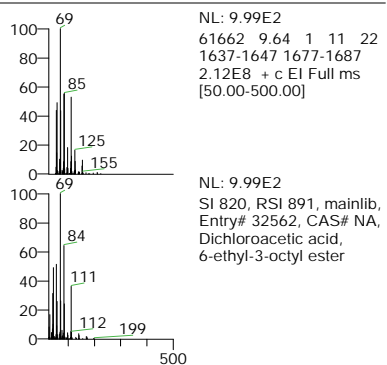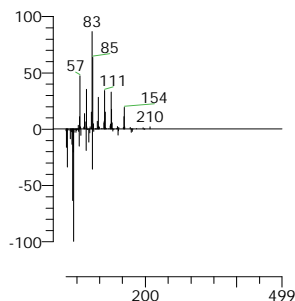

Dichloroacetic acid, 6-ethyl-3-octyl ester  
Formula C<sub>12</sub>H<sub>22</sub>Cl<sub>2</sub>O<sub>2</sub>, MW 268, CAS# NA, Entry# 32562  
1,4-Diethylhexyl dichloroacetate #

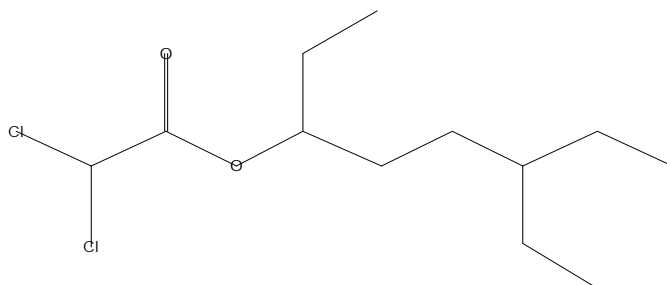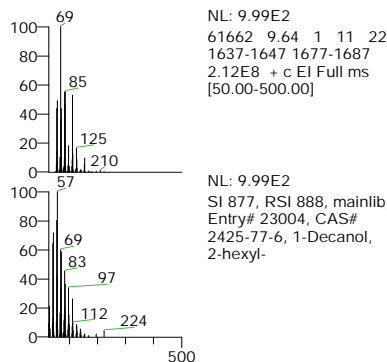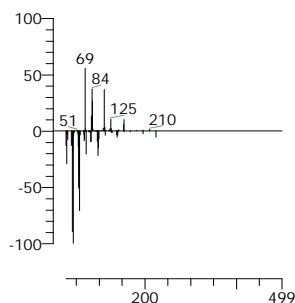

1-Decanol, 2-hexyl-  
Formula C<sub>16</sub>H<sub>34</sub>O, MW 242, CAS# 2425-77-6, Entry# 23004  
2-Hexyl-1-decanol

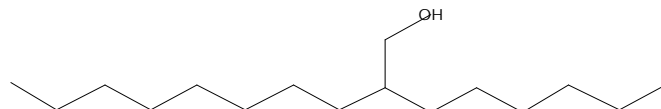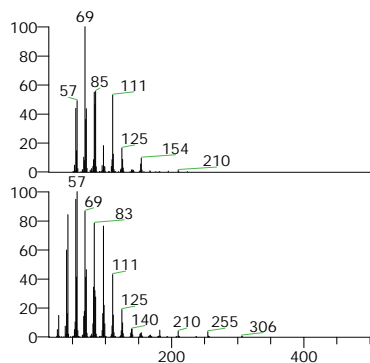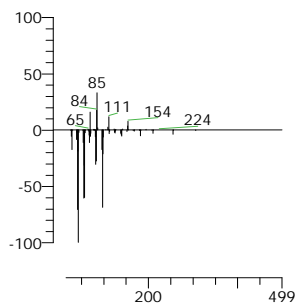

Trifluoroacetic acid, pentadecyl ester  
Formula C<sub>17</sub>H<sub>31</sub>F<sub>3</sub>O<sub>2</sub>, MW 324, CAS# 959010-23-2, Entry# 23039

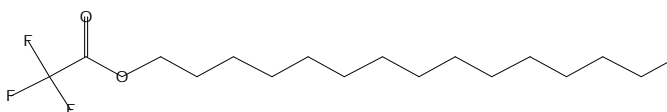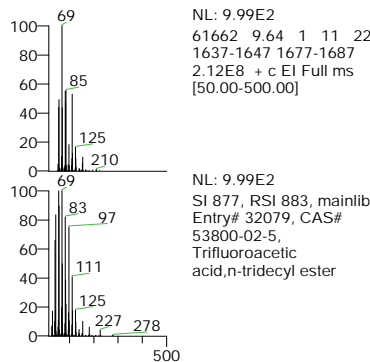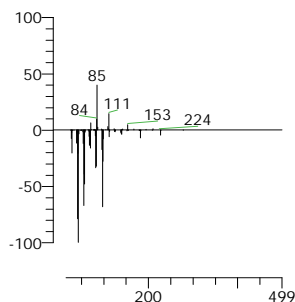

Trifluoroacetic acid,n-tridecyl ester  
Formula C<sub>15</sub>H<sub>27</sub>F<sub>3</sub>O<sub>2</sub>, MW 296, CAS# 53800-02-5, Entry# 32079  
Tridecyl trifluoroacetate #

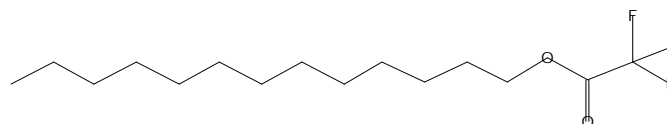

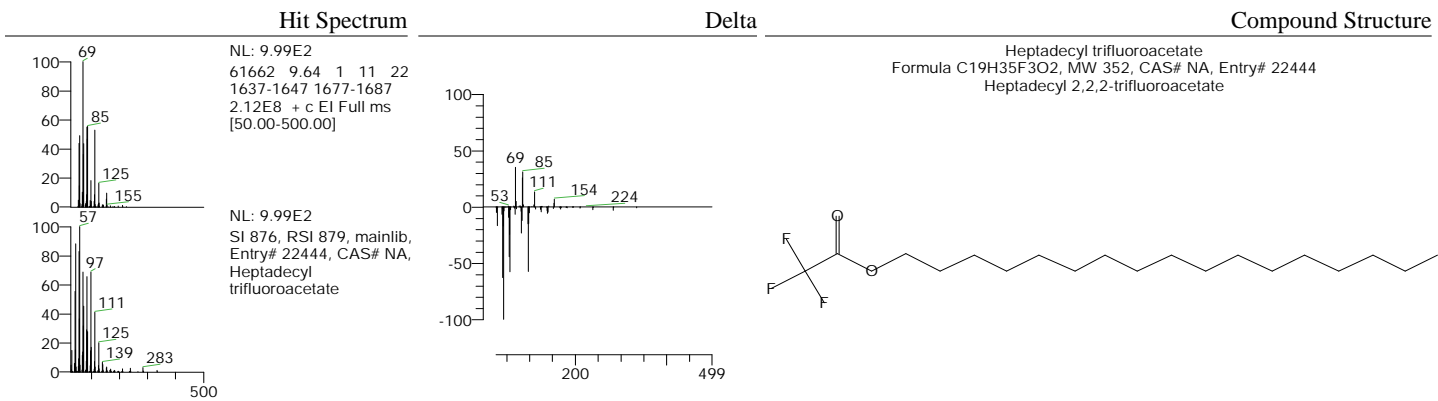

| RT   | Compound Name                              | Area       | Area % | RSI | Cas #       | Library |
|------|--------------------------------------------|------------|--------|-----|-------------|---------|
| 9.64 | Dichloroacetic acid, 6-ethyl-3-octyl ester | 5295349553 | 2.80   | 891 | NA          | mainlib |
| 9.64 | 1-Decanol, 2-hexyl-                        | 5295349553 | 2.80   | 888 | 2425-77-6   | mainlib |
| 9.64 | Trifluoroacetic acid, pentadecyl ester     | 5295349553 | 2.80   | 885 | 959010-23-2 | mainlib |

## Hit Spectrum

## Delta

## Compound Structure

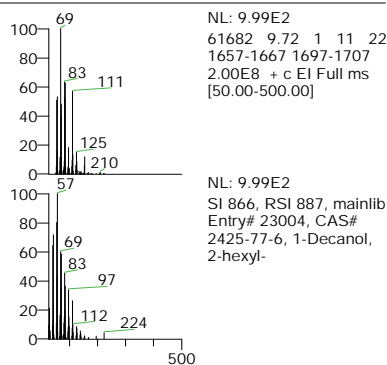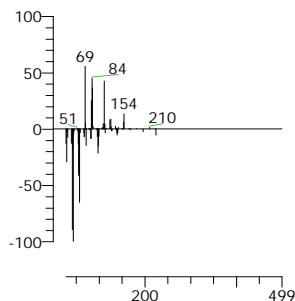

1-Decanol, 2-hexyl-  
Formula C16H34O, MW 242, CAS# 2425-77-6, Entry# 23004  
2-Hexyl-1-decanol

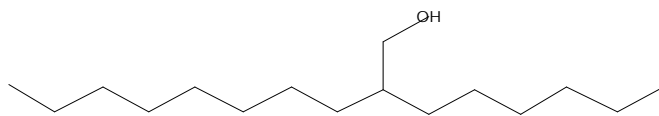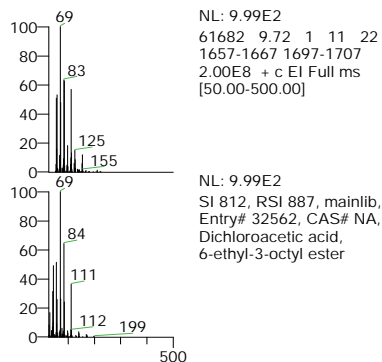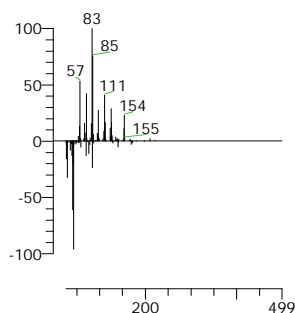

Dichloroacetic acid, 6-ethyl-3-octyl ester  
Formula C12H22Cl2O2, MW 268, CAS# NA, Entry# 32562  
1,4-Diethylhexyl dichloroacetate #

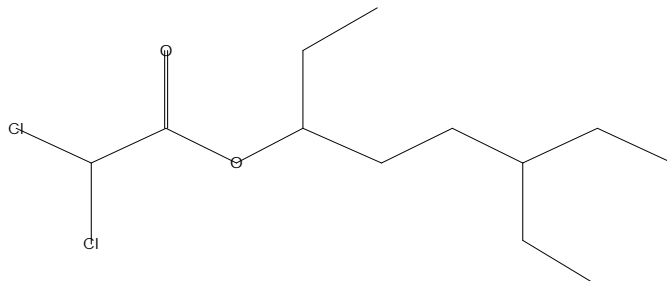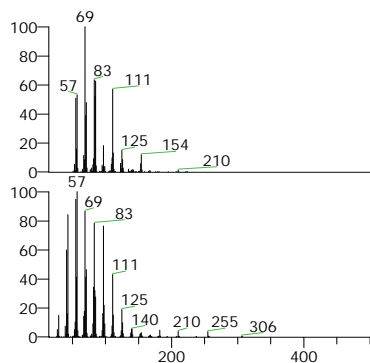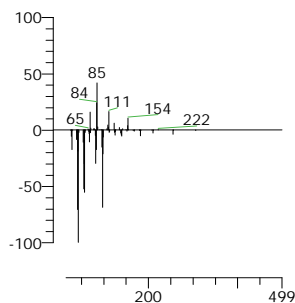

Trifluoroacetic acid, pentadecyl ester  
Formula C17H31F3O2, MW 324, CAS# 959010-23-2, Entry# 23039

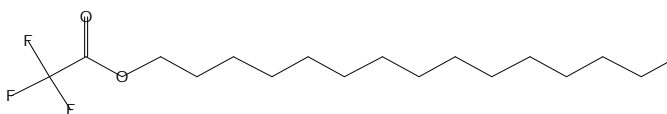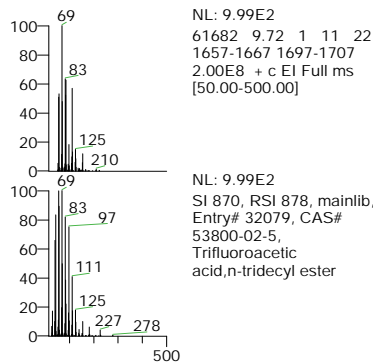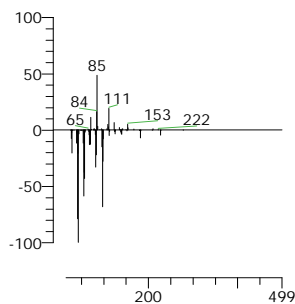

Trifluoroacetic acid, n-tridecyl ester  
Formula C15H27F3O2, MW 296, CAS# 53800-02-5, Entry# 32079  
Tridecyl trifluoroacetate #



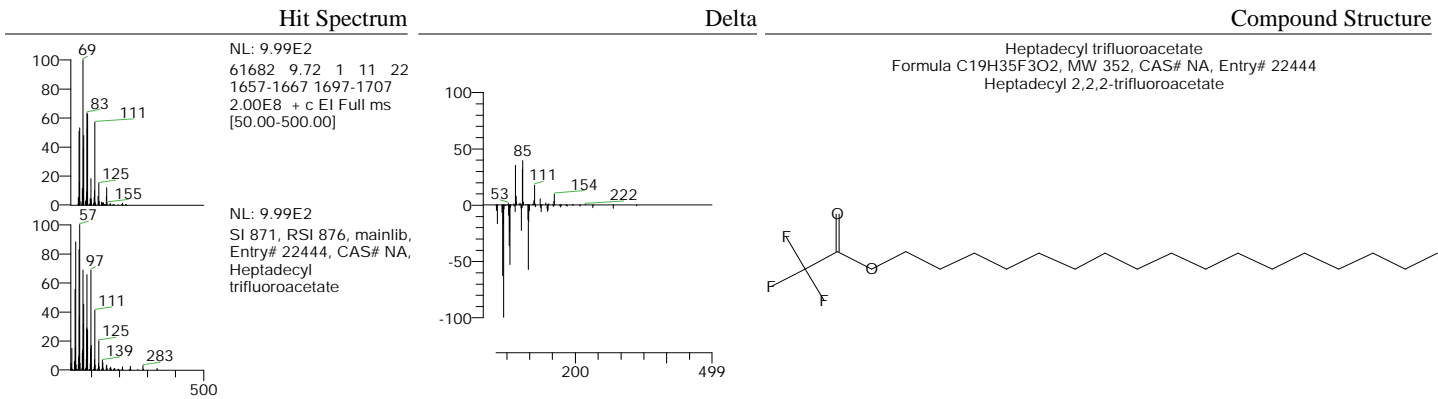

| RT   | Compound Name                              | Area       | Area % | RSI | Cas #       | Library |
|------|--------------------------------------------|------------|--------|-----|-------------|---------|
| 9.72 | Dichloroacetic acid, 6-ethyl-3-octyl ester | 7669227459 | 4.06   | 887 | NA          | mainlib |
| 9.72 | 1-Decanol, 2-hexyl-                        | 7669227459 | 4.06   | 887 | 2425-77-6   | mainlib |
| 9.72 | Trifluoroacetic acid, pentadecyl ester     | 7669227459 | 4.06   | 882 | 959010-23-2 | mainlib |

## Hit Spectrum

## Delta

## Compound Structure

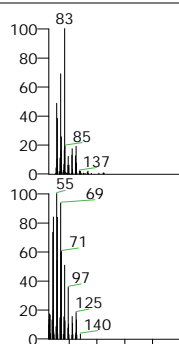

NL: 9.99E2  
61782 10.05 1 11  
22.1757-1767  
1797-1807 2.43E8 + c  
EI Full ms [50.00-500.00]

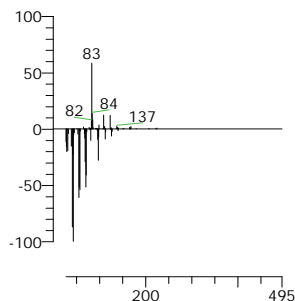

1-Dodecanol, 3,7,11-trimethyl-  
Formula C<sub>15</sub>H<sub>32</sub>O, MW 228, CAS# 6750-34-1, Entry# 18829  
Hexa-hydro-farnesol

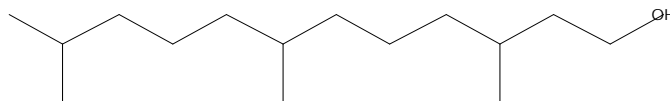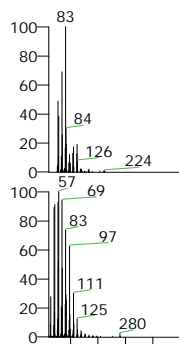

NL: 9.99E2  
61782 10.05 1 11  
22.1757-1767  
1797-1807 2.43E8 + c  
EI Full ms [50.00-500.00]

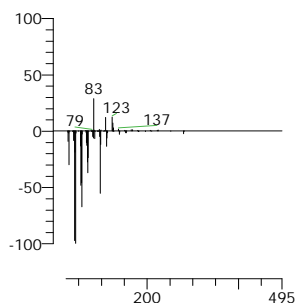

3-Eicosene, (E)-  
Formula C<sub>20</sub>H<sub>40</sub>, MW 280, CAS# 74685-33-9, Entry# 23390  
(3E)-3-Icosene #

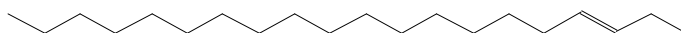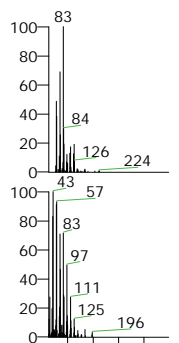

NL: 9.99E2  
61782 10.05 1 11 22  
1757-1767 1797-1807  
2.43E8 + c EI Full ms  
[50.00-500.00]

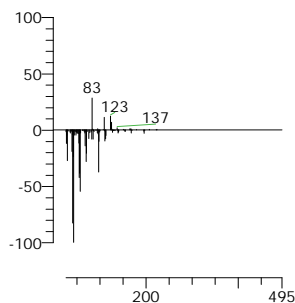

Dichloroacetic acid, tetradecyl ester  
Formula C<sub>16</sub>H<sub>30</sub>Cl<sub>2</sub>O<sub>2</sub>, MW 324, CAS# 83005-02-1, Entry# 7343  
Tetradecyl dichloroacetate #

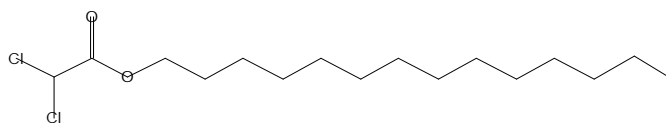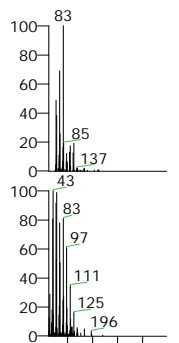

NL: 9.99E2  
61782 10.05 1 11 22  
1757-1767 1797-1807  
2.43E8 + c EI Full ms  
[50.00-500.00]

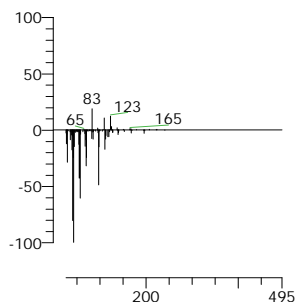

Trichloroacetic acid, tetradecyl ester  
Formula C<sub>16</sub>H<sub>29</sub>Cl<sub>3</sub>O<sub>2</sub>, MW 358, CAS# 74339-52-9, Entry# 7359  
Tetradecyl trichloroacetate #

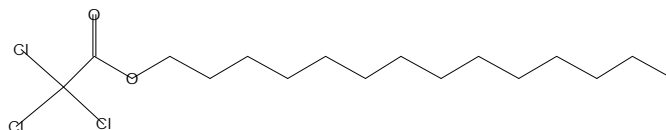



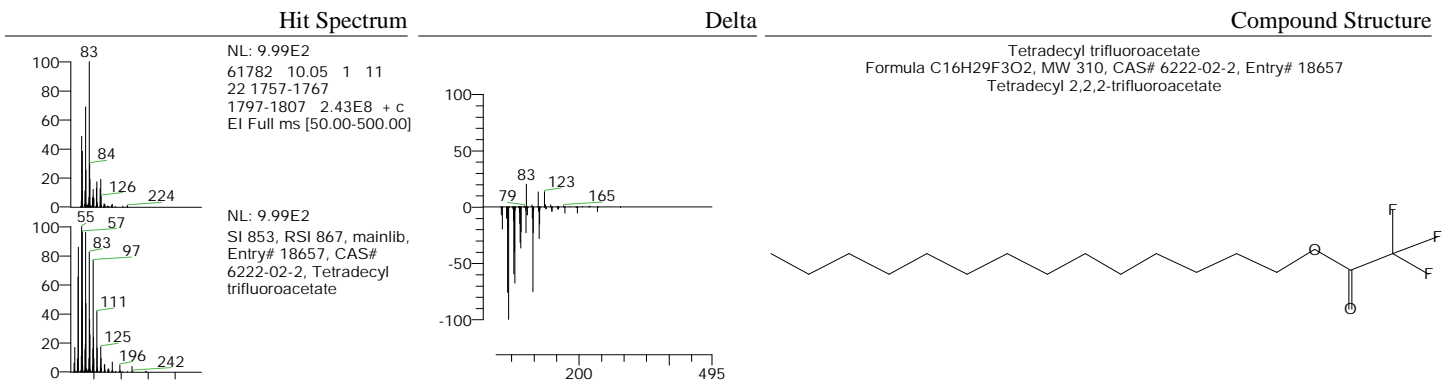

| RT    | Compound Name                         | Area       | Area % | RSI | Cas #      | Library |
|-------|---------------------------------------|------------|--------|-----|------------|---------|
| 10.05 | 1-Dodecanol, 3,7,11-trimethyl-        | 5412264755 | 2.87   | 881 | 6750-34-1  | mainlib |
| 10.05 | 3-Eicosene, (E)-                      | 5412264755 | 2.87   | 872 | 74685-33-9 | mainlib |
| 10.05 | Dichloroacetic acid, tetradecyl ester | 5412264755 | 2.87   | 870 | 83005-02-1 | mainlib |

## Hit Spectrum

## Delta

## Compound Structure

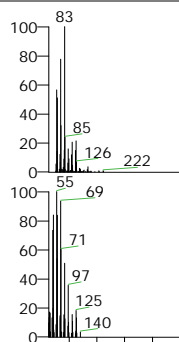

NL: 9.99E2  
61865 10.33 1 11 22  
1840-1850  
1880-1890 1.29E8 + c  
EI Full ms [50.00-500.00]

NL: 9.99E2  
SI 845, RSI 903, mainlib,  
Entry# 18829, CAS#  
6750-34-1, 1-Dodecanol,  
3,7,11-trimethyl-

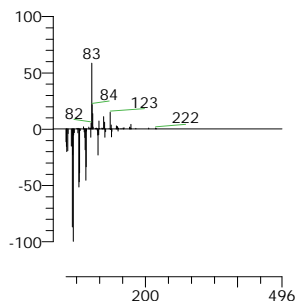

1-Dodecanol, 3,7,11-trimethyl-  
Formula C15H32O, MW 228, CAS# 6750-34-1, Entry# 18829  
Hexa-hydro-farnesol

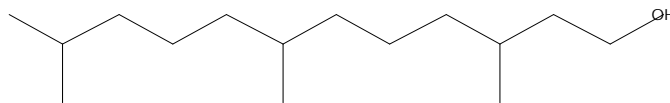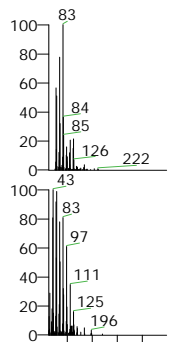

NL: 9.99E2  
61865 10.33 1 11 22  
1840-1850 1880-1890  
1.29E8 + c EI Full ms  
[50.00-500.00]

NL: 9.99E2  
SI 852, RSI 902, mainlib,  
Entry# 7359, CAS#  
74339-52-9,  
Trichloroacetic acid,  
tetradecyl ester

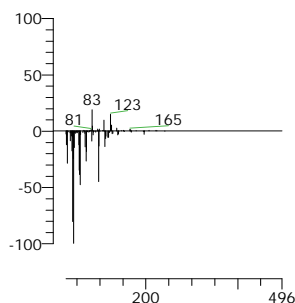

Trichloroacetic acid, tetradecyl ester  
Formula C16H29Cl3O2, MW 358, CAS# 74339-52-9, Entry# 7359  
Tetradecyl trichloroacetate #

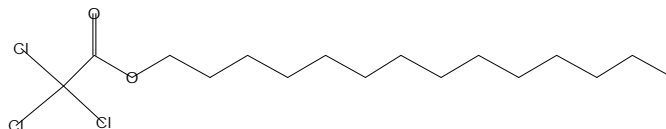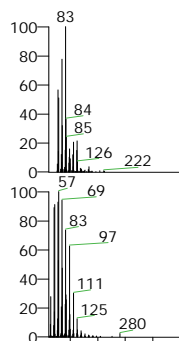

NL: 9.99E2  
61865 10.33 1 11 22  
1840-1850  
1880-1890 1.29E8 + c  
EI Full ms [50.00-500.00]

NL: 9.99E2  
SI 878, RSI 899, mainlib,  
Entry# 23390, CAS#  
74685-33-9, 3-Eicosene,  
(E)-

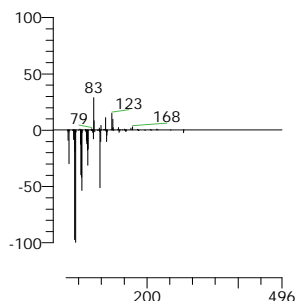

3-Eicosene, (E)-  
Formula C20H40, MW 280, CAS# 74685-33-9, Entry# 23390  
(3E)-3-Icosene #

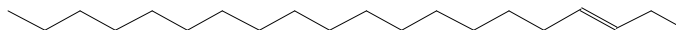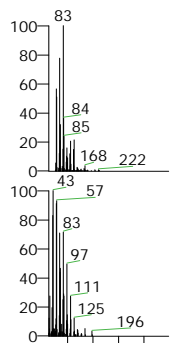

NL: 9.99E2  
61865 10.33 1 11 22  
1840-1850 1880-1890  
1.29E8 + c EI Full ms  
[50.00-500.00]

NL: 9.99E2  
SI 848, RSI 899, mainlib,  
Entry# 7343, CAS#  
83005-02-1,  
Dichloroacetic acid,  
tetradecyl ester

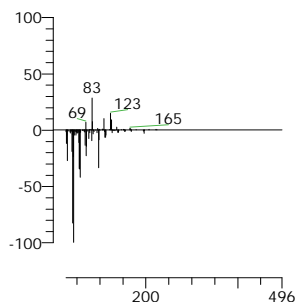

Dichloroacetic acid, tetradecyl ester  
Formula C16H30Cl2O2, MW 324, CAS# 83005-02-1, Entry# 7343  
Tetradecyl dichloroacetate #

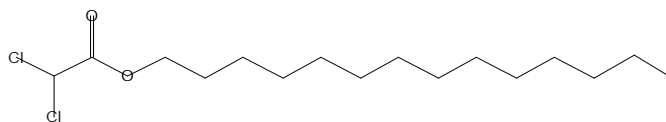

## Hit Spectrum

## Delta

## Compound Structure

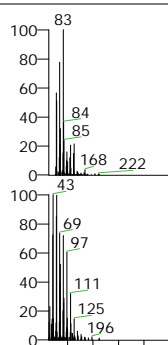

NL: 9.99E2  
61865 10.33 1 11 22  
1840-1850 1880-1890  
1.29E8 + c EI Full ms  
[50.00-500.00]

NL: 9.99E2  
SI 849, RSI 896, mainlib,  
Entry# 7365, CAS#  
74339-54-1,  
Trichloroacetic acid,  
hexadecyl ester

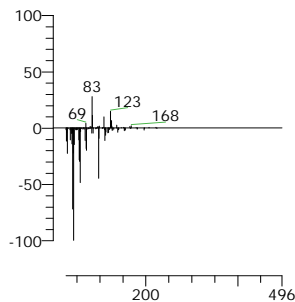

Trichloroacetic acid, hexadecyl ester  
Formula C18H33Cl3O2, MW 386, CAS# 74339-54-1, Entry# 7365  
Hexadecyl trichloroacetate #

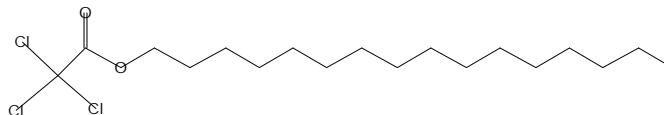

| RT    | Compound Name                          | Area       | Area % | RSI | Cas #      | Library |
|-------|----------------------------------------|------------|--------|-----|------------|---------|
| 10.33 | 1-Dodecanol, 3,7,11-trimethyl-         | 2361823358 | 1.25   | 903 | 6750-34-1  | mainlib |
| 10.33 | Trichloroacetic acid, tetradecyl ester | 2361823358 | 1.25   | 902 | 74339-52-9 | mainlib |
| 10.33 | 3-Eicosene, (E)-                       | 2361823358 | 1.25   | 899 | 74685-33-9 | mainlib |

## Hit Spectrum

## Delta

## Compound Structure

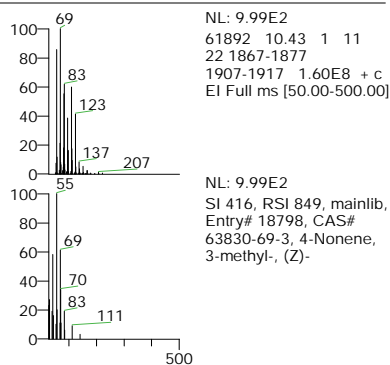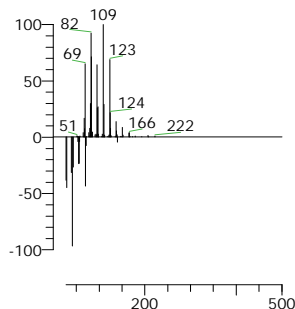

4-Nonene, 3-methyl-, (Z)-  
Formula C<sub>10</sub>H<sub>20</sub>, MW 140, CAS# 63830-69-3, Entry# 18798  
(4Z)-3-Methyl-4-nonene #

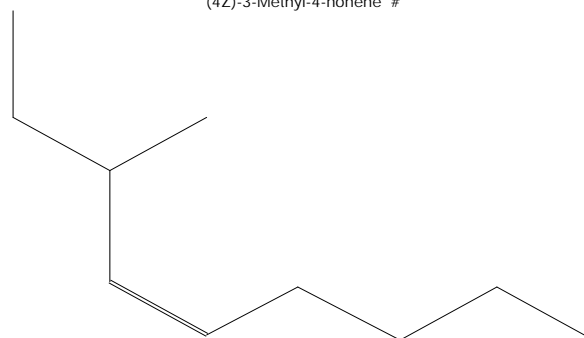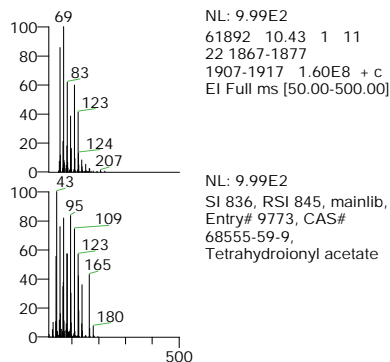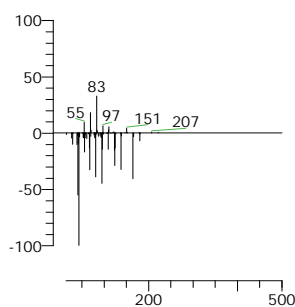

Tetrahydroionyl acetate  
Formula C<sub>15</sub>H<sub>28</sub>O<sub>2</sub>, MW 240, CAS# 68555-59-9, Entry# 9773  
Cyclohexanepropanol, à,2,2,6-tetramethyl-, acetate

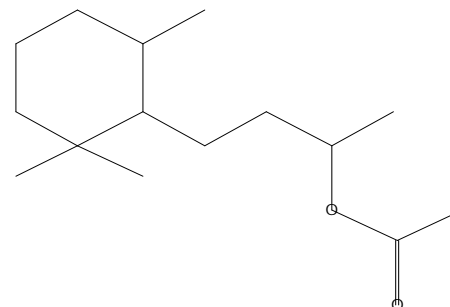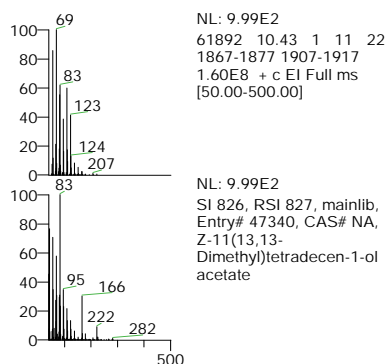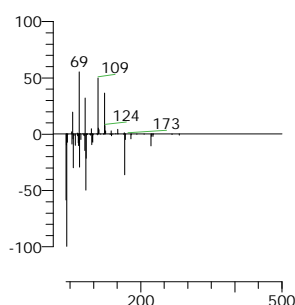

Z-11(13,13-Dimethyl)tetradecen-1-ol acetate  
Formula C<sub>18</sub>H<sub>34</sub>O<sub>2</sub>, MW 282, CAS# NA, Entry# 47340  
(11Z)-13,13-Dimethyl-11-tetradecenyl acetate #

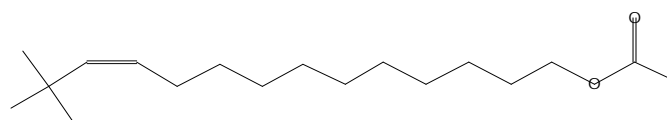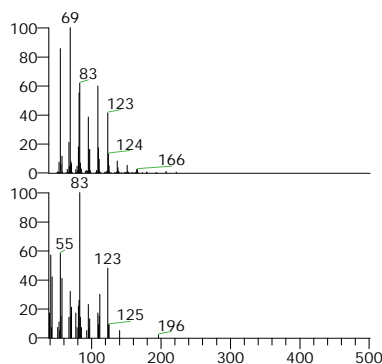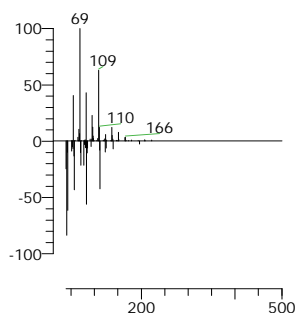

Cyclopropanol, 1-(3,7-dimethyl-1-octenyl)-  
Formula C<sub>13</sub>H<sub>24</sub>O, MW 196, CAS# 65147-72-0, Entry# 47465  
1-[(1E)-3,7-Dimethyl-1-octenyl]cyclopropanol #

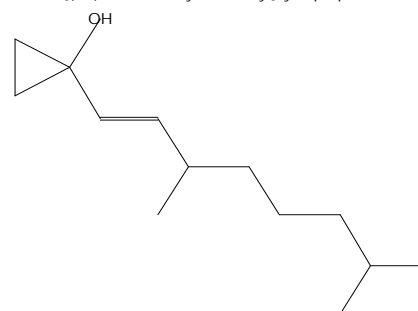

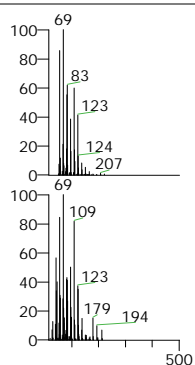

NL: 9.99E2  
61892 10.43 1 11  
22 1867-1877  
1907-1917 1.60E8 + c  
EI Full ms [50.00-500.00]

NL: 9.99E2  
SI 813, RSI 822, mainlib,  
Entry# 32148, CAS#  
60241-53-4, Methyl  
tetrahydroionol

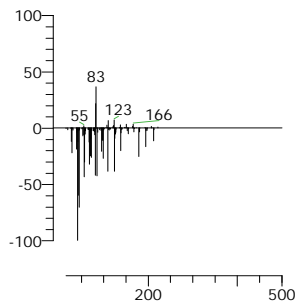

Methyl tetrahydroionol  
Formula C<sub>14</sub>H<sub>28</sub>O, MW 212, CAS# 60241-53-4, Entry# 32148  
Cyclohexanepropanol, α,α,2,2,6-pentamethyl-

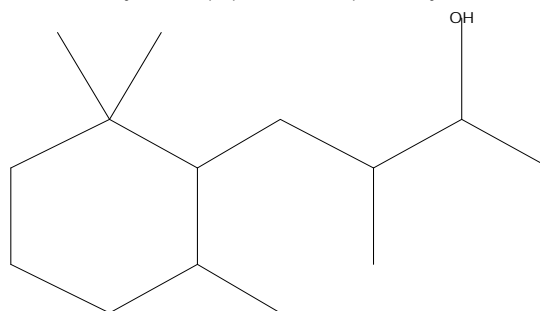

| RT    | Compound Name                               | Area       | Area % | RSI | Cas #      | Library |
|-------|---------------------------------------------|------------|--------|-----|------------|---------|
| 10.43 | 4-Nonene, 3-methyl-, (Z)-                   | 2819469763 | 1.49   | 849 | 63830-69-3 | mainlib |
| 10.43 | Tetrahydroionyl acetate                     | 2819469763 | 1.49   | 845 | 68555-59-9 | mainlib |
| 10.43 | Z-11(13,13-Dimethyl)tetradecen-1-ol acetate | 2819469763 | 1.49   | 827 | NA         | mainlib |

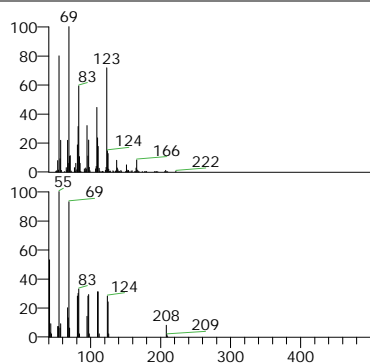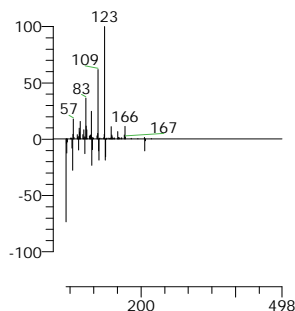

1-Cyclohexyl-1-(4-methylcyclohexyl)ethane  
Formula C<sub>15</sub>H<sub>28</sub>, MW 208, CAS# 2027-12-5, Entry# 18790  
1-(1-Cyclohexylethyl)-4-methylcyclohexane #

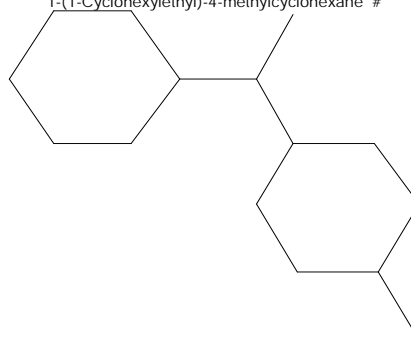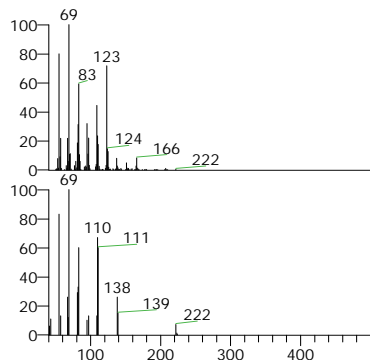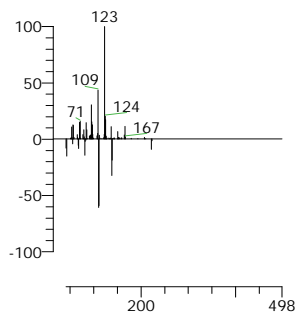

1-Cyclohexyl-1-(4-ethylcyclohexyl)ethane  
Formula C<sub>16</sub>H<sub>30</sub>, MW 222, CAS# 2027-13-6, Entry# 32150  
1-(1-Cyclohexylethyl)-4-ethylcyclohexane #

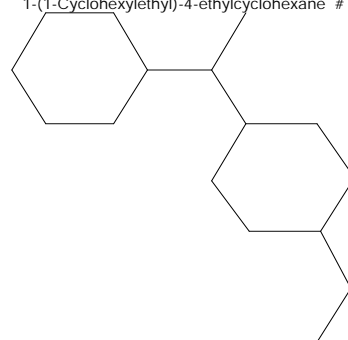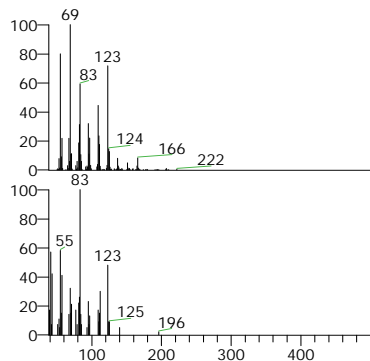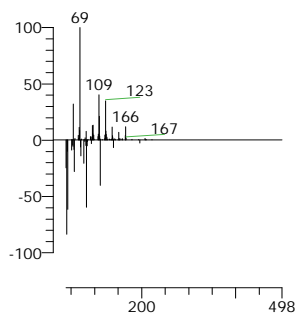

Cyclopropanol, 1-(3,7-dimethyl-1-octenyl)-  
Formula C<sub>13</sub>H<sub>24</sub>O, MW 196, CAS# 65147-72-0, Entry# 47465  
1-[(1E)-3,7-Dimethyl-1-octenyl]cyclopropanol #

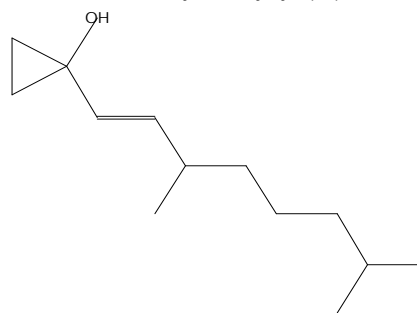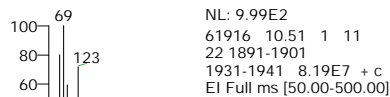

NL: 9.99E2  
61916 10.51 1 11  
22 1891-1901  
1931-1941 8.19E7 + c  
EI Full ms [50.00-500.00]

NL: 9.99E2  
SI 821, RSI 839, mainlib,  
Entry# 32148, CAS#  
60241-53-4, Methyl  
tetrahydroionol

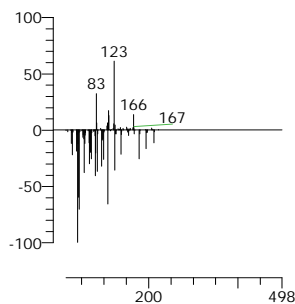

Methyl tetrahydroionol  
Formula C<sub>14</sub>H<sub>28</sub>O, MW 212, CAS# 60241-53-4, Entry# 32148  
Cyclohexanepropanol, 2,2,6,6-tetramethyl-

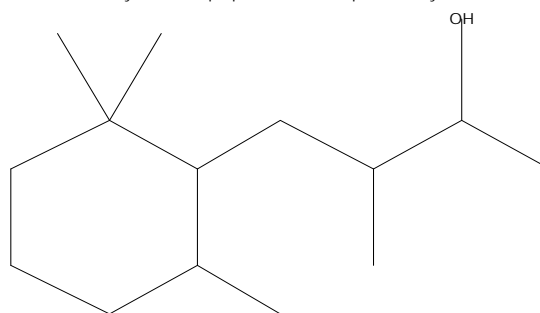

## Hit Spectrum

## Delta

## Compound Structure

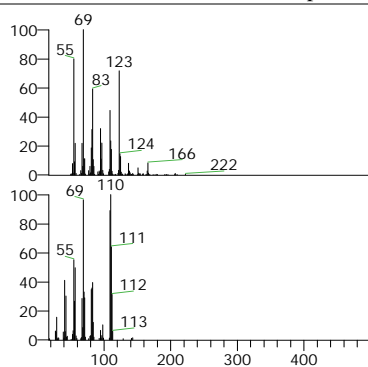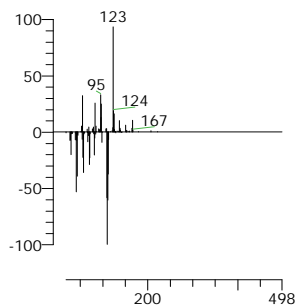

Cyclohexane, [2-[(2-ethylhexyl)oxy]ethyl]-  
Formula C<sub>16</sub>H<sub>32</sub>O, MW 240, CAS# 55133-98-7, Entry# 78512  
(2-[(2-Ethylhexyl)oxy]ethyl)cyclohexane #

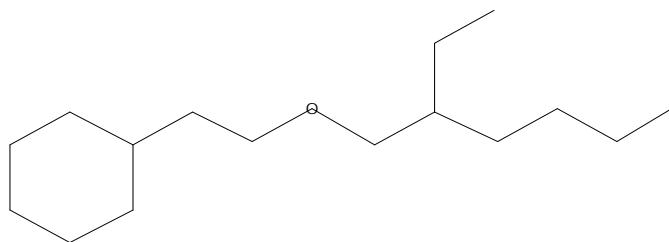

| RT    | Compound Name                              | Area       | Area % | RSI | Cas #      | Library |
|-------|--------------------------------------------|------------|--------|-----|------------|---------|
| 10.51 | 1-Cyclohexyl-1-(4-methylcyclohexyl)ethane  | 2217671643 | 1.17   | 930 | 2027-12-5  | mainlib |
| 10.51 | 1-Cyclohexyl-1-(4-ethylcyclohexyl)ethane   | 2217671643 | 1.17   | 878 | 2027-13-6  | mainlib |
| 10.51 | Cyclopropanol, 1-(3,7-dimethyl-1-octenyl)- | 2217671643 | 1.17   | 868 | 65147-72-0 | mainlib |

Analysed By:

Checked By:

## Hit Spectrum

## Delta

## Compound Structure

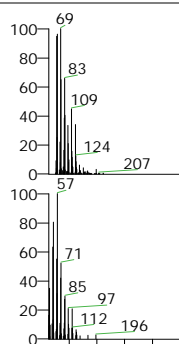

NL: 9.99E2  
61950 10.63 1 11  
22 1925-1935  
1965-1975 6.98E7 + c  
EI Full ms [50.00-500.00]

NL: 9.99E2  
SI 784, RSI 918, mainlib,  
Entry# 22406, CAS#  
19780-79-1,  
2-Hexyl-1-octanol

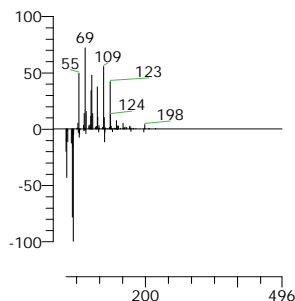

2-Hexyl-1-octanol  
Formula C<sub>14</sub>H<sub>30</sub>O, MW 214, CAS# 19780-79-1, Entry# 22406

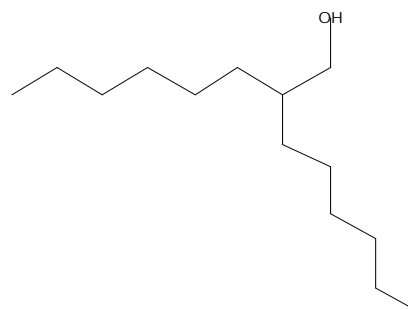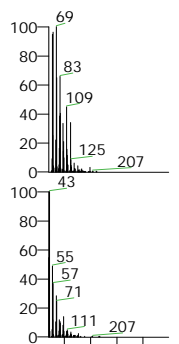

NL: 9.99E2  
61950 10.63 1 11 22  
1925-1935 1965-1975  
6.98E7 + c EI Full ms  
[50.00-500.00]

NL: 9.99E2  
SI 882, RSI 910, mainlib,  
Entry# 5703, CAS#  
195194-80-0,  
2-Piperidinone,  
N-[4-bromo-n-butyl]-

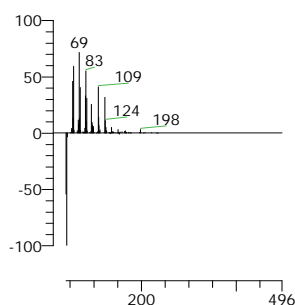

2-Piperidinone, N-[4-bromo-n-butyl]-  
Formula C<sub>9</sub>H<sub>16</sub>BrNO, MW 233, CAS# 195194-80-0, Entry# 5703  
1-(4-Bromobutyl)-2-piperidinone #

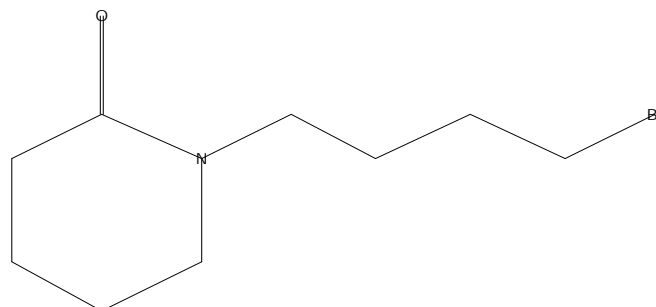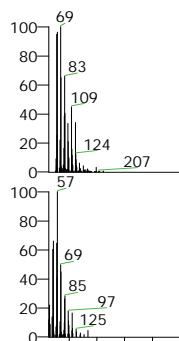

NL: 9.99E2  
61950 10.63 1 11  
22 1925-1935  
1965-1975 6.98E7 + c  
EI Full ms [50.00-500.00]

NL: 9.99E2  
SI 762, RSI 898, mainlib,  
Entry# 22453, CAS#  
3913-02-8, 1-Octanol,  
2-butyl-

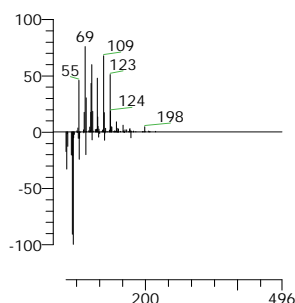

1-Octanol, 2-butyl-  
Formula C<sub>12</sub>H<sub>26</sub>O, MW 186, CAS# 3913-02-8, Entry# 22453  
2-Butyl-1-octanol

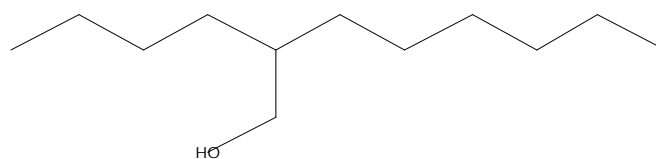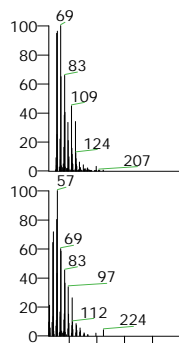

NL: 9.99E2  
61950 10.63 1 11  
22 1925-1935  
1965-1975 6.98E7 + c  
EI Full ms [50.00-500.00]

NL: 9.99E2  
SI 827, RSI 896, mainlib,  
Entry# 23004, CAS#  
2425-77-6, 1-Decanol,  
2-hexyl-

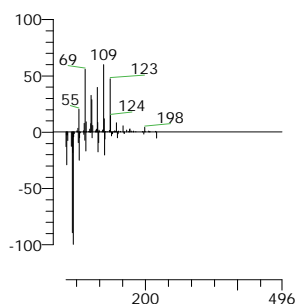

1-Decanol, 2-hexyl-  
Formula C<sub>16</sub>H<sub>34</sub>O, MW 242, CAS# 2425-77-6, Entry# 23004  
2-Hexyl-1-decanol

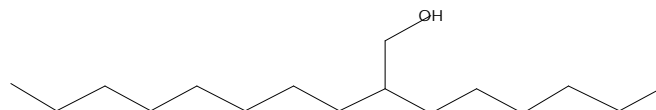



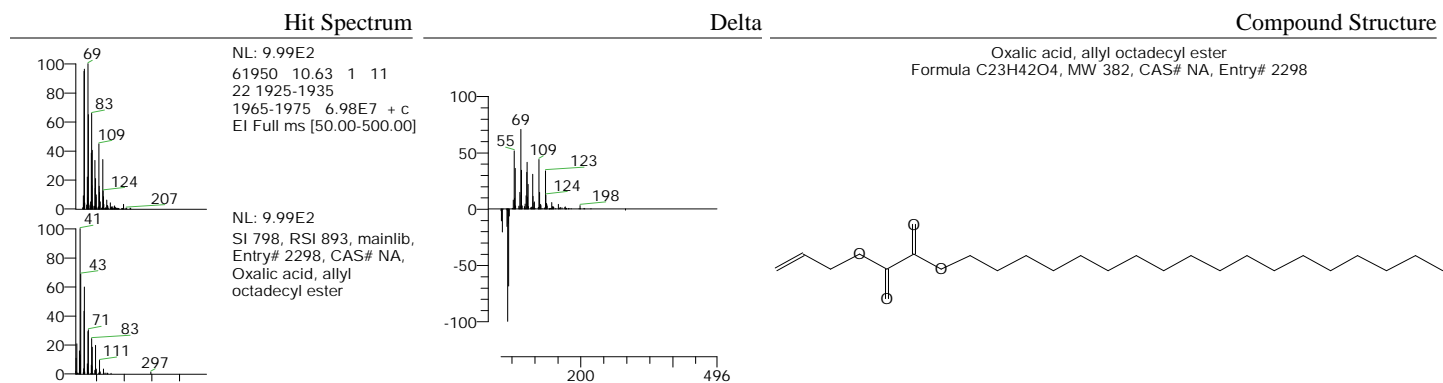

| RT    | Compound Name                        | Area       | Area % | RSI | Cas #       | Library |
|-------|--------------------------------------|------------|--------|-----|-------------|---------|
| 10.63 | 2-Hexyl-1-octanol                    | 1689888683 | 0.89   | 918 | 19780-79-1  | mainlib |
| 10.63 | 2-Piperidinone, N-[4-bromo-n-butyl]- | 1689888683 | 0.89   | 910 | 195194-80-0 | mainlib |
| 10.63 | 1-Octanol, 2-butyl-                  | 1689888683 | 0.89   | 898 | 3913-02-8   | mainlib |

## Hit Spectrum

## Delta

## Compound Structure

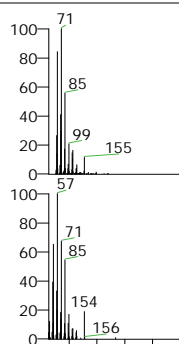

NL: 9.99E2  
62180 11.41 1 11  
22 2155-2165  
2195-2205 8.78E7 + c  
EI Full ms [50.00-500.00]

NL: 9.99E2  
SI 906, RSI 939, mainlib,  
Entry# 23599, CAS#  
56862-62-5,  
10-Methylnonadecane

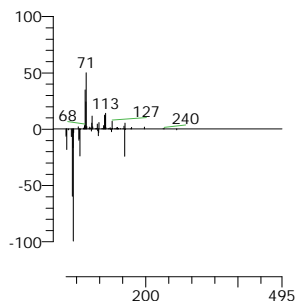

10-Methylnonadecane  
Formula C<sub>20</sub>H<sub>42</sub>, MW 282, CAS# 56862-62-5, Entry# 23599  
Nonadecane, 10-methyl

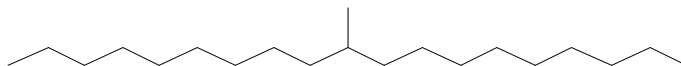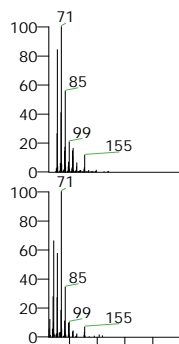

NL: 9.99E2  
62180 11.41 1 11  
22 2155-2165  
2195-2205 8.78E7 + c  
EI Full ms [50.00-500.00]

NL: 9.99E2  
SI 892, RSI 932, mainlib,  
Entry# 35060, CAS# NA,  
Sulfurous acid, pentyl  
undecyl ester

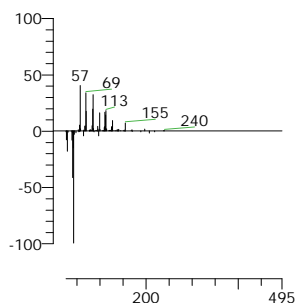

Sulfurous acid, pentyl undecyl ester  
Formula C<sub>16</sub>H<sub>34</sub>O<sub>3</sub>S, MW 306, CAS# NA, Entry# 35060

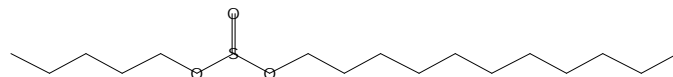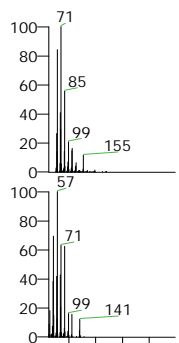

NL: 9.99E2  
62180 11.41 1 11 22  
2155-2165 2195-2205  
8.78E7 + c EI Full ms  
[50.00-500.00]

NL: 9.99E2  
SI 832, RSI 932, mainlib,  
Entry# 22517, CAS# NA,  
Oxalic acid,  
6-ethyloct-3-yl heptyl  
ester

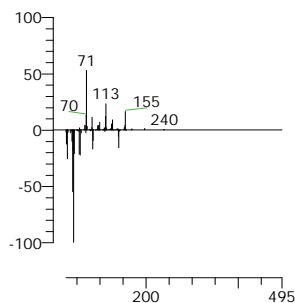

Oxalic acid, 6-ethyloct-3-yl heptyl ester  
Formula C<sub>19</sub>H<sub>36</sub>O<sub>4</sub>, MW 328, CAS# NA, Entry# 22517

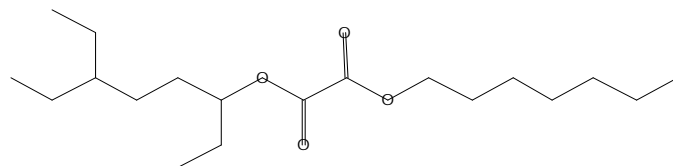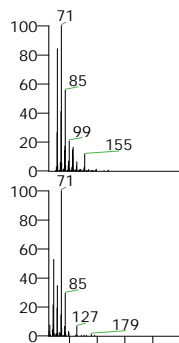

NL: 9.99E2  
62180 11.41 1 11  
22 2155-2165  
2195-2205 8.78E7 + c  
EI Full ms [50.00-500.00]

NL: 9.99E2  
SI 750, RSI 931, mainlib,  
Entry# 35058, CAS# NA,  
Sulfurous acid, nonyl  
pentyl ester

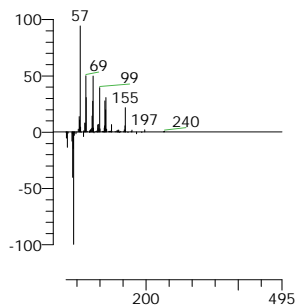

Sulfurous acid, nonyl pentyl ester  
Formula C<sub>14</sub>H<sub>30</sub>O<sub>3</sub>S, MW 278, CAS# NA, Entry# 35058

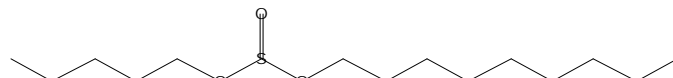

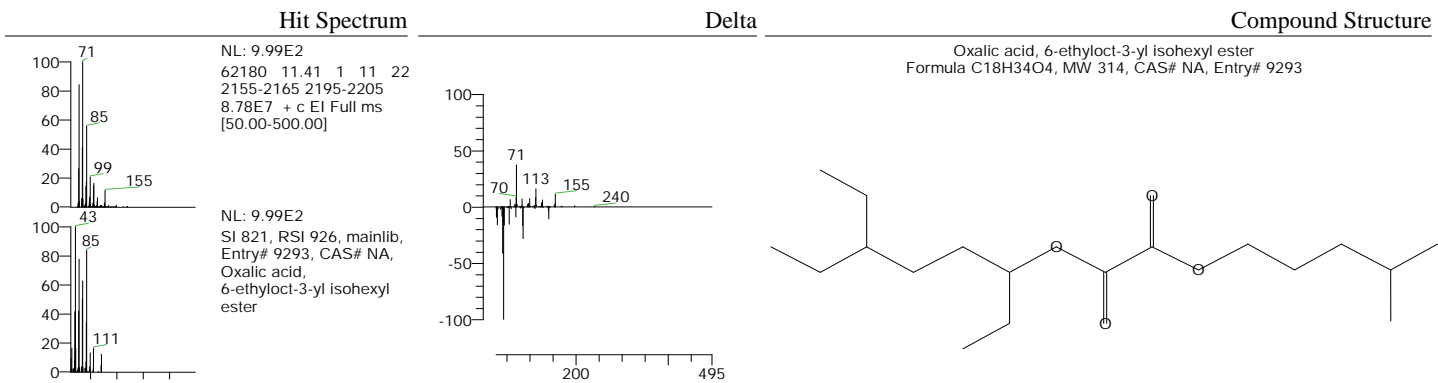

| RT    | Compound Name                             | Area       | Area % | RSI | Cas #      | Library |
|-------|-------------------------------------------|------------|--------|-----|------------|---------|
| 11.41 | 10-Methylnonadecane                       | 1484406118 | 0.79   | 939 | 56862-62-5 | mainlib |
| 11.41 | Oxalic acid, 6-ethyloct-3-yl heptyl ester | 1484406118 | 0.79   | 932 | NA         | mainlib |
| 11.41 | Sulfurous acid, pentyl undecyl ester      | 1484406118 | 0.79   | 932 | NA         | mainlib |

## Hit Spectrum

## Delta

## Compound Structure

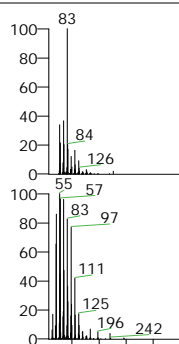

NL: 9.99E2  
62301 11.82 1 11  
22 2276-2286  
2316-2326 2.71E8 + c  
EI Full ms [50.00-500.00]

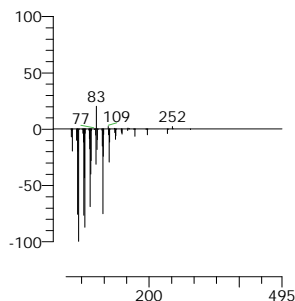

Tetradecyl trifluoroacetate  
Formula C<sub>16</sub>H<sub>29</sub>F<sub>3</sub>O<sub>2</sub>, MW 310, CAS# 6222-02-2, Entry# 18657  
Tetradecyl 2,2,2-trifluoroacetate

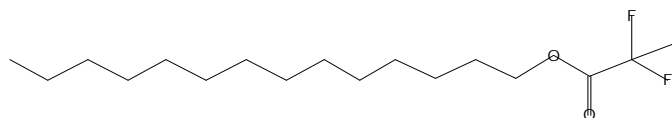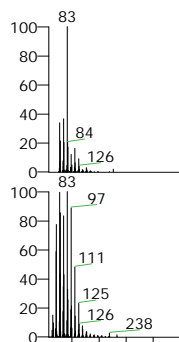

NL: 9.99E2  
62301 11.82 1 11  
22 2276-2286  
2316-2326 2.71E8 + c  
EI Full ms [50.00-500.00]

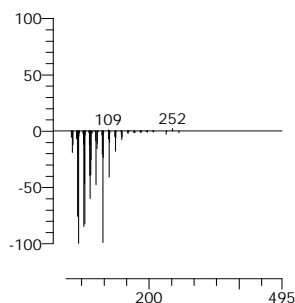

n-Nonadecanol-1  
Formula C<sub>19</sub>H<sub>40</sub>O, MW 284, CAS# 1454-84-8, Entry# 47640  
1-Nonadecanol

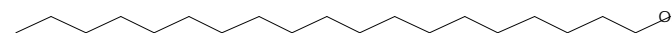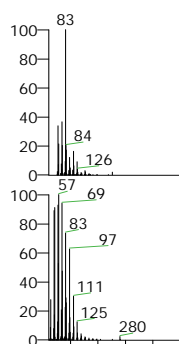

NL: 9.99E2  
62301 11.82 1 11  
22 2276-2286  
2316-2326 2.71E8 + c  
EI Full ms [50.00-500.00]

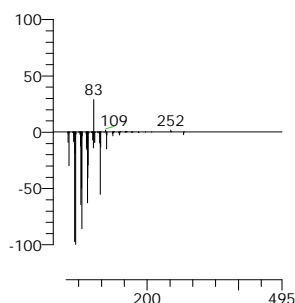

3-Eicosene, (E)-  
Formula C<sub>20</sub>H<sub>40</sub>, MW 280, CAS# 74685-33-9, Entry# 23390  
(3E)-3-Icosene #

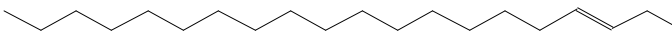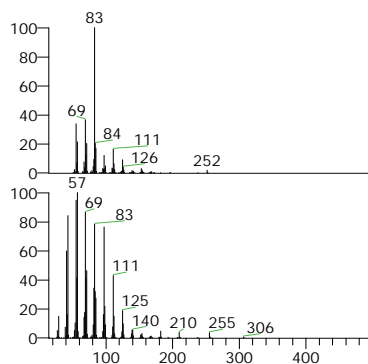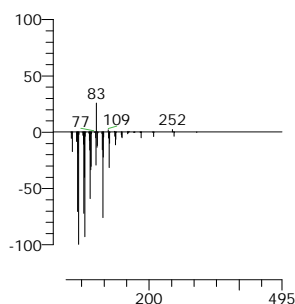

Trifluoroacetic acid, pentadecyl ester  
Formula C<sub>17</sub>H<sub>31</sub>F<sub>3</sub>O<sub>2</sub>, MW 324, CAS# 959010-23-2, Entry# 23039

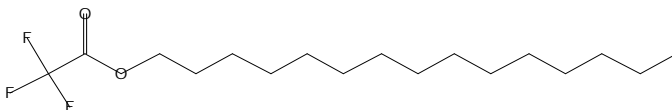

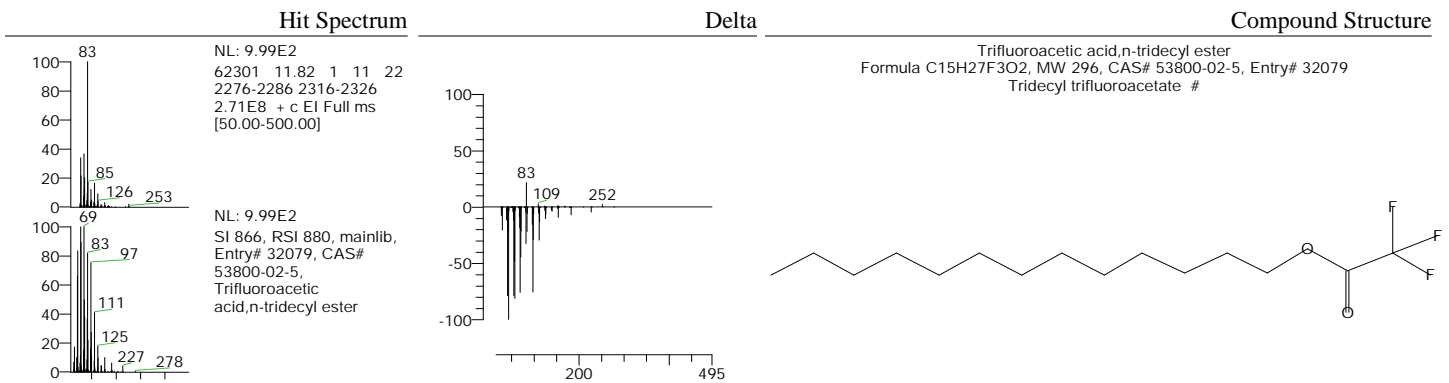

| RT    | Compound Name               | Area       | Area % | RSI | Cas #      | Library |
|-------|-----------------------------|------------|--------|-----|------------|---------|
| 11.82 | n-Nonadecanol-1             | 3709529236 | 1.96   | 885 | 1454-84-8  | mainlib |
| 11.82 | Tetradecyl trifluoroacetate | 3709529236 | 1.96   | 885 | 6222-02-2  | mainlib |
| 11.82 | 3-Eicosene, (E)-            | 3709529236 | 1.96   | 881 | 74685-33-9 | mainlib |

Analysed By:

Checked By:

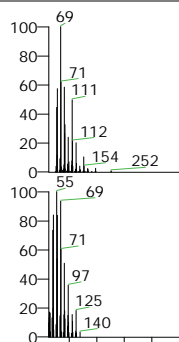

NL: 9.99E2  
62421 12.23 1 11  
22 2396-2406  
2436-2446 2.20E8 + c  
EI Full ms [50.00-500.00]

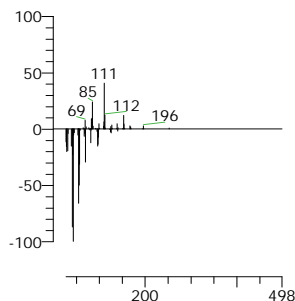

1-Dodecanol, 3,7,11-trimethyl-  
Formula C<sub>15</sub>H<sub>32</sub>O, MW 228, CAS# 6750-34-1, Entry# 18829  
Hexa-hydro-farnesol

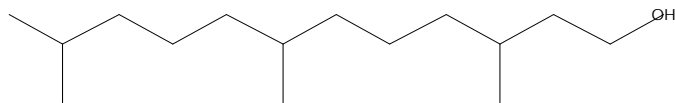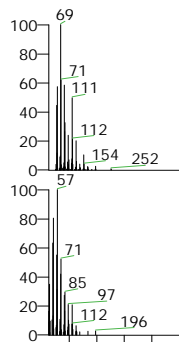

NL: 9.99E2  
62421 12.23 1 11  
22 2396-2406  
2436-2446 2.20E8 + c  
EI Full ms [50.00-500.00]

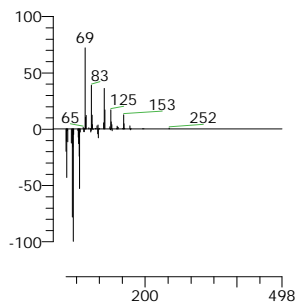

2-Hexyl-1-octanol  
Formula C<sub>14</sub>H<sub>30</sub>O, MW 214, CAS# 19780-79-1, Entry# 22406

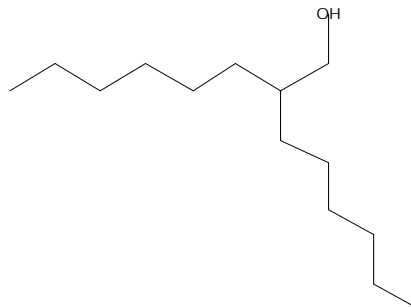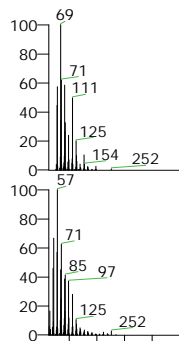

NL: 9.99E2  
62421 12.23 1 11  
22 2396-2406  
2436-2446 2.20E8 + c  
EI Full ms [50.00-500.00]

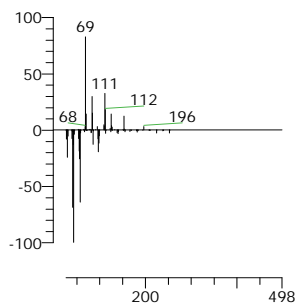

1-Dodecanol, 2-hexyl-  
Formula C<sub>18</sub>H<sub>38</sub>O, MW 270, CAS# 110225-00-8, Entry# 22630  
2-Hexyldodecan-1-ol

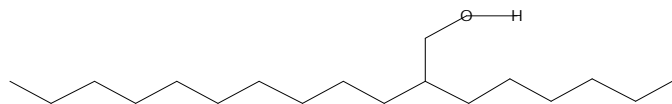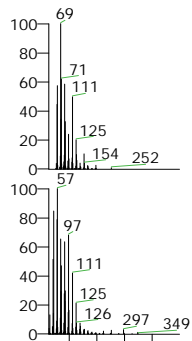

NL: 9.99E2  
62421 12.23 1 11  
22 2396-2406  
2436-2446 2.20E8 + c  
EI Full ms [50.00-500.00]

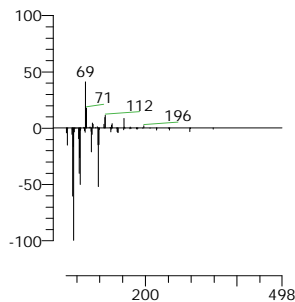

Octadecyl trifluoroacetate  
Formula C<sub>20</sub>H<sub>37</sub>F<sub>3</sub>O<sub>2</sub>, MW 366, CAS# 79392-43-1, Entry# 22467  
Octadecyl 2,2,2-trifluoroacetate

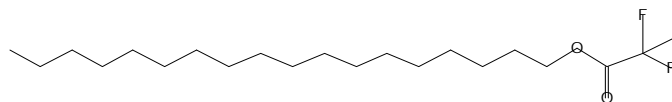

## Hit Spectrum

## Delta

## Compound Structure

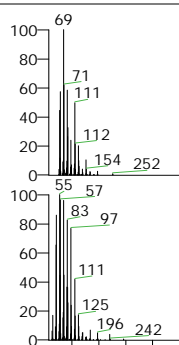

NL: 9.99E2  
62421 12.23 1 11  
22 2396-2406  
2436-2446 2.20E8 + c  
EI Full ms [50.00-500.00]

NL: 9.99E2  
SI 902, RSI 904, mainlib,  
Entry# 18657, CAS#  
6222-02-2, Tetradecyl  
trifluoroacetate

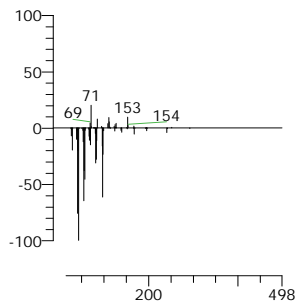

Tetradecyl trifluoroacetate  
Formula C<sub>16</sub>H<sub>29</sub>F<sub>3</sub>O<sub>2</sub>, MW 310, CAS# 6222-02-2, Entry# 18657  
Tetradecyl 2,2,2-trifluoroacetate

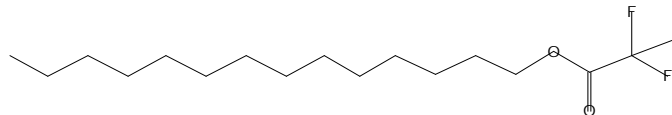

| RT    | Compound Name                  | Area       | Area % | RSI | Cas #       | Library |
|-------|--------------------------------|------------|--------|-----|-------------|---------|
| 12.23 | 1-Dodecanol, 3,7,11-trimethyl- | 6512101996 | 3.45   | 908 | 6750-34-1   | mainlib |
| 12.23 | 2-Hexyl-1-octanol              | 6512101996 | 3.45   | 907 | 19780-79-1  | mainlib |
| 12.23 | 1-Dodecanol, 2-hexyl-          | 6512101996 | 3.45   | 905 | 110225-00-8 | mainlib |

Analysed By:

Checked By:

## Hit Spectrum

## Delta

## Compound Structure

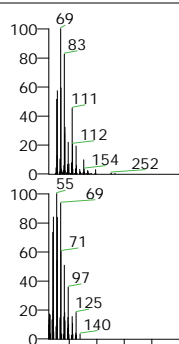

NL: 9.99E2  
62453 12.34 1 11  
22 2428-2438  
2468-2478 1.86E8 + c  
EI Full ms [50.00-500.00]

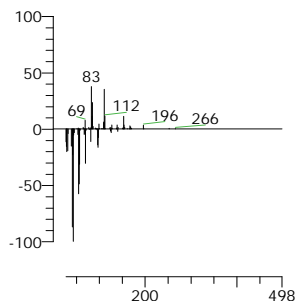

1-Dodecanol, 3,7,11-trimethyl-  
Formula C15H32O, MW 228, CAS# 6750-34-1, Entry# 18829  
Hexa-hydro-farnesol

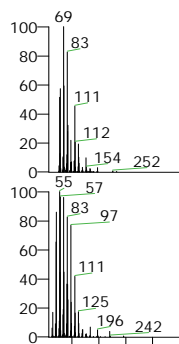

NL: 9.99E2  
62453 12.34 1 11  
22 2428-2438  
2468-2478 1.86E8 + c  
EI Full ms [50.00-500.00]

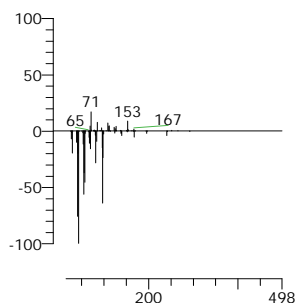

Tetradecyl trifluoroacetate  
Formula C16H29F3O2, MW 310, CAS# 6222-02-2, Entry# 18657  
Tetradecyl 2,2,2-trifluoroacetate

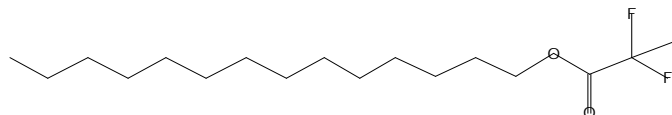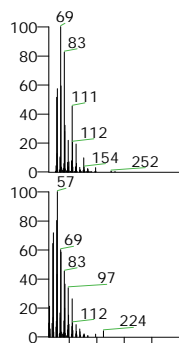

NL: 9.99E2  
62453 12.34 1 11  
22 2428-2438  
2468-2478 1.86E8 + c  
EI Full ms [50.00-500.00]

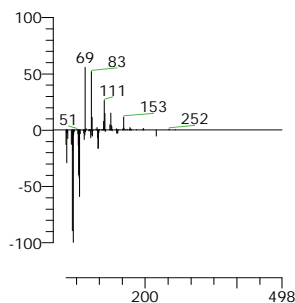

1-Decanol, 2-hexyl-  
Formula C16H34O, MW 242, CAS# 2425-77-6, Entry# 23004  
2-Hexyl-1-decanol

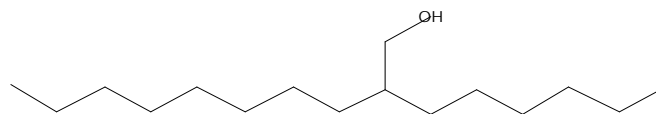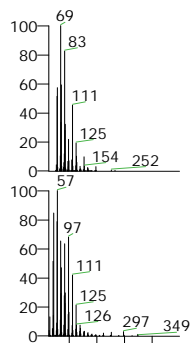

NL: 9.99E2  
62453 12.34 1 11  
22 2428-2438  
2468-2478 1.86E8 + c  
EI Full ms [50.00-500.00]

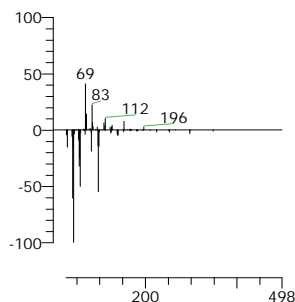

Octadecyl trifluoroacetate  
Formula C20H37F3O2, MW 366, CAS# 79392-43-1, Entry# 22467  
Octadecyl 2,2,2-trifluoroacetate





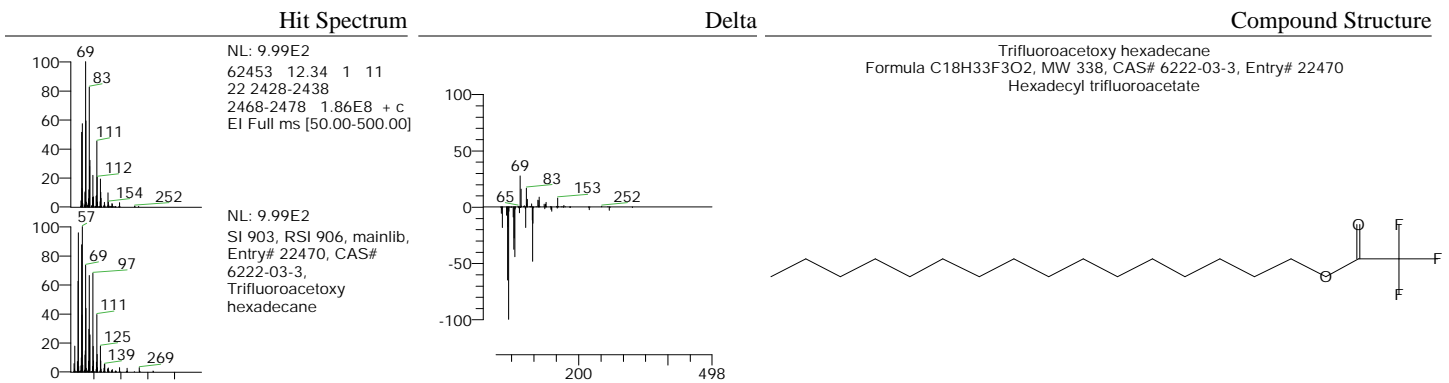

| RT    | Compound Name                  | Area       | Area % | RSI | Cas #     | Library |
|-------|--------------------------------|------------|--------|-----|-----------|---------|
| 12.34 | 1-Dodecanol, 3,7,11-trimethyl- | 5533453585 | 2.93   | 913 | 6750-34-1 | mainlib |
| 12.34 | Tetradecyl trifluoroacetate    | 5533453585 | 2.93   | 909 | 6222-02-2 | mainlib |
| 12.34 | 1-Decanol, 2-hexyl-            | 5533453585 | 2.93   | 907 | 2425-77-6 | mainlib |

Analysed By:

Checked By:

## Hit Spectrum

## Delta

## Compound Structure

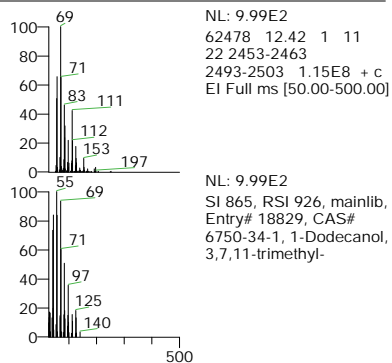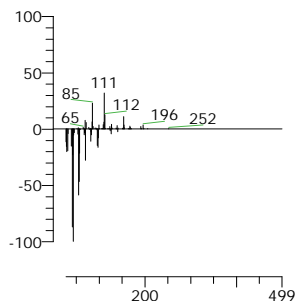

1-Dodecanol, 3,7,11-trimethyl-  
Formula C15H32O, MW 228, CAS# 6750-34-1, Entry# 18829  
Hexa-hydro-farnesol

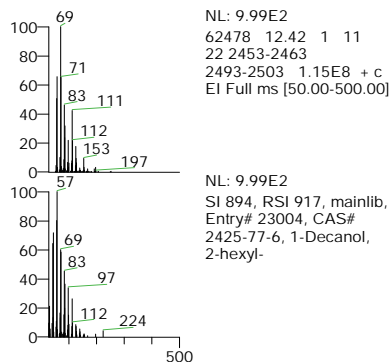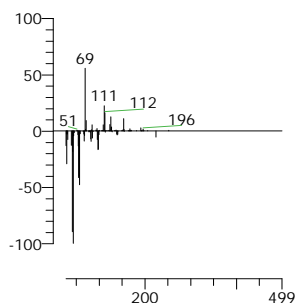

1-Decanol, 2-hexyl-  
Formula C16H34O, MW 242, CAS# 2425-77-6, Entry# 23004  
2-Hexyl-1-decanol

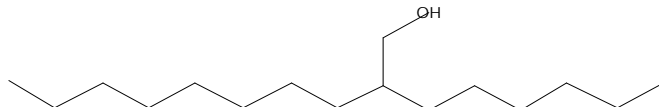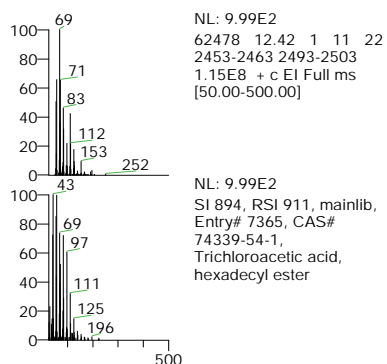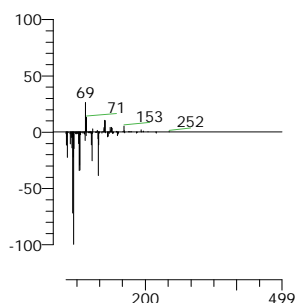

Trichloroacetic acid, hexadecyl ester  
Formula C18H33Cl3O2, MW 386, CAS# 74339-54-1, Entry# 7365  
Hexadecyl trichloroacetate #

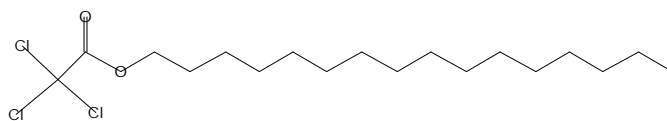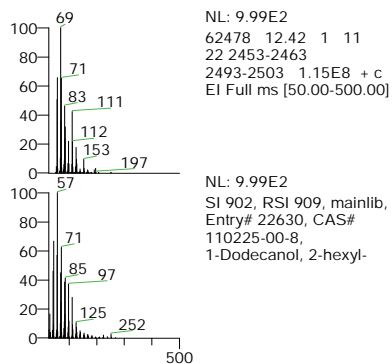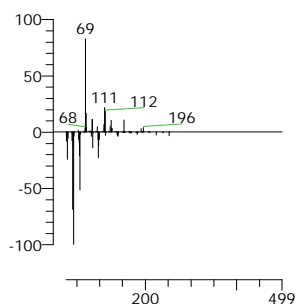

1-Dodecanol, 2-hexyl-  
Formula C18H38O, MW 270, CAS# 110225-00-8, Entry# 22630  
2-Hexyldodecan-1-ol

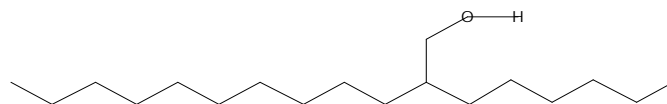

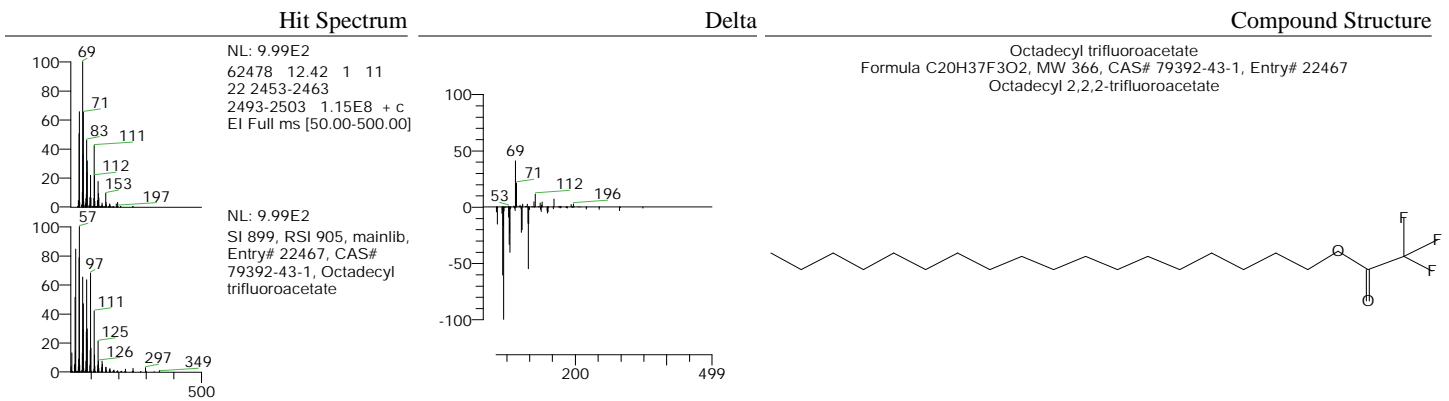

| RT    | Compound Name                         | Area       | Area % | RSI | Cas #      | Library |
|-------|---------------------------------------|------------|--------|-----|------------|---------|
| 12.42 | 1-Dodecanol, 3,7,11-trimethyl-        | 2257684067 | 1.20   | 926 | 6750-34-1  | mainlib |
| 12.42 | 1-Decanol, 2-hexyl-                   | 2257684067 | 1.20   | 917 | 2425-77-6  | mainlib |
| 12.42 | Trichloroacetic acid, hexadecyl ester | 2257684067 | 1.20   | 911 | 74339-54-1 | mainlib |

## Hit Spectrum

## Delta

## Compound Structure

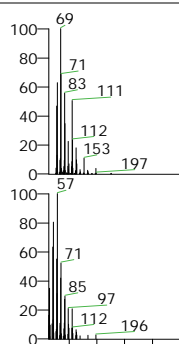

NL: 9.98E2  
62515 12.55 1 11  
22 2490-2500  
2530-2540 1.92E8 + c  
EI Full ms [50.00-500.00]

NL: 9.99E2  
SI 866, RSI 914, mainlib,  
Entry# 22406, CAS#  
19780-79-1,  
2-Hexyl-1-octanol

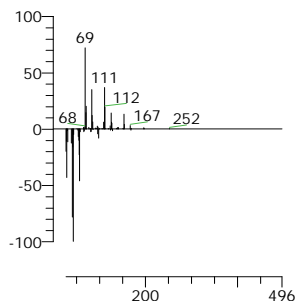

2-Hexyl-1-octanol  
Formula C14H30O, MW 214, CAS# 19780-79-1, Entry# 22406

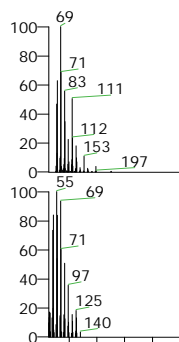

NL: 9.98E2  
62515 12.55 1 11  
22 2490-2500  
2530-2540 1.92E8 + c  
EI Full ms [50.00-500.00]

NL: 9.99E2  
SI 856, RSI 910, mainlib,  
Entry# 18829, CAS#  
6750-34-1, 1-Dodecanol,  
3,7,11-trimethyl-

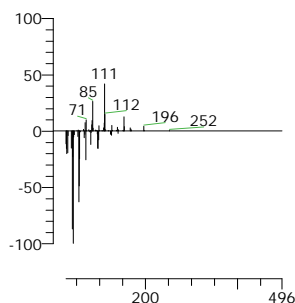

1-Dodecanol, 3,7,11-trimethyl-  
Formula C15H32O, MW 228, CAS# 6750-34-1, Entry# 18829  
Hexa-hydro-farnesol

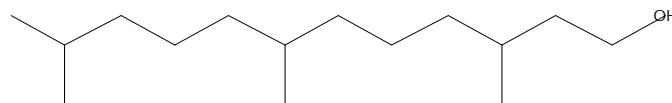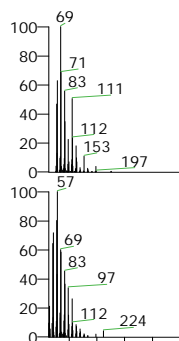

NL: 9.98E2  
62515 12.55 1 11  
22 2490-2500  
2530-2540 1.92E8 + c  
EI Full ms [50.00-500.00]

NL: 9.99E2  
SI 894, RSI 906, mainlib,  
Entry# 23004, CAS#  
2425-77-6, 1-Decanol,  
2-hexyl-

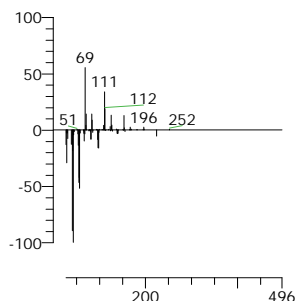

1-Decanol, 2-hexyl-  
Formula C16H34O, MW 242, CAS# 2425-77-6, Entry# 23004  
2-Hexyl-1-decanol

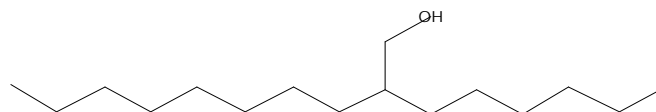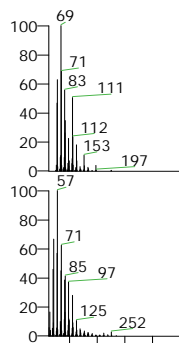

NL: 9.98E2  
62515 12.55 1 11  
22 2490-2500  
2530-2540 1.92E8 + c  
EI Full ms [50.00-500.00]

NL: 9.99E2  
SI 903, RSI 904, mainlib,  
Entry# 22630, CAS#  
110225-00-8,  
1-Dodecanol, 2-hexyl-

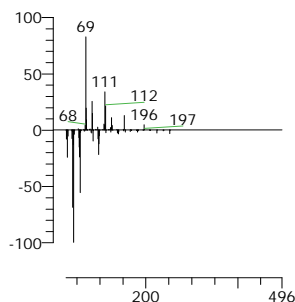

1-Dodecanol, 2-hexyl-  
Formula C18H38O, MW 270, CAS# 110225-00-8, Entry# 22630  
2-Hexyldodecan-1-ol

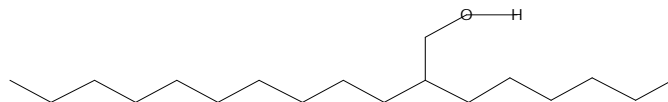

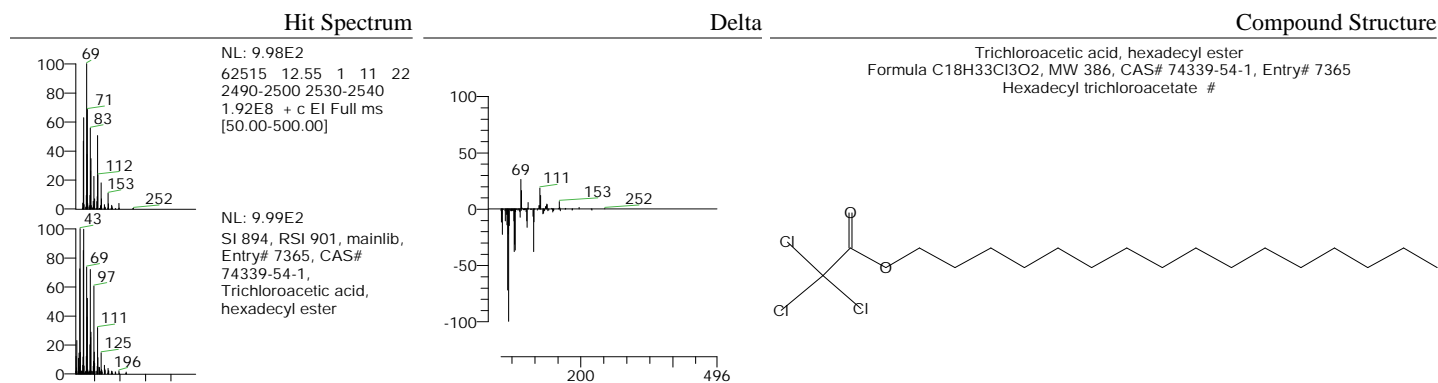

| RT    | Compound Name                  | Area       | Area % | RSI | Cas #      | Library |
|-------|--------------------------------|------------|--------|-----|------------|---------|
| 12.55 | 2-Hexyl-1-octanol              | 4364120807 | 2.31   | 914 | 19780-79-1 | mainlib |
| 12.55 | 1-Dodecanol, 3,7,11-trimethyl- | 4364120807 | 2.31   | 910 | 6750-34-1  | mainlib |
| 12.55 | 1-Decanol, 2-hexyl-            | 4364120807 | 2.31   | 906 | 2425-77-6  | mainlib |

## Hit Spectrum

## Delta

## Compound Structure

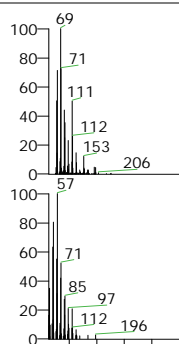

NL: 9.98E2  
62547 12.66 1 11  
22 2522-2532  
2562-2572 1.03E8 + c  
EI Full ms [50.00-500.00]

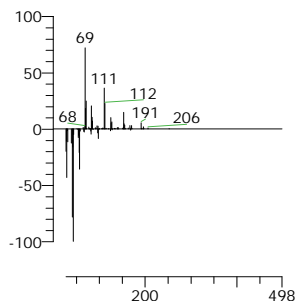

2-Hexyl-1-octanol  
Formula C14H30O, MW 214, CAS# 19780-79-1, Entry# 22406

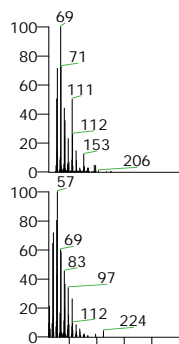

NL: 9.98E2  
62547 12.66 1 11  
22 2522-2532  
2562-2572 1.03E8 + c  
EI Full ms [50.00-500.00]

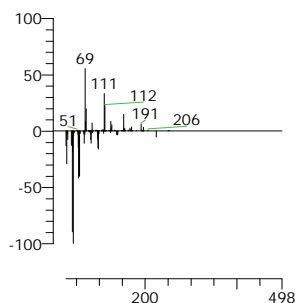

1-Decanol, 2-hexyl-  
Formula C16H34O, MW 242, CAS# 2425-77-6, Entry# 23004  
2-Hexyl-1-decanol

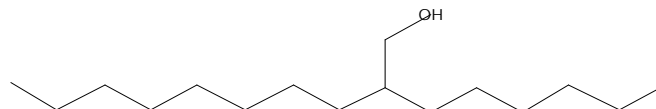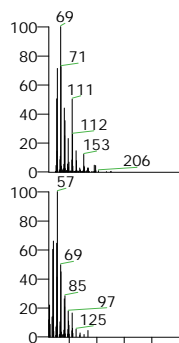

NL: 9.98E2  
62547 12.66 1 11  
22 2522-2532  
2562-2572 1.03E8 + c  
EI Full ms [50.00-500.00]

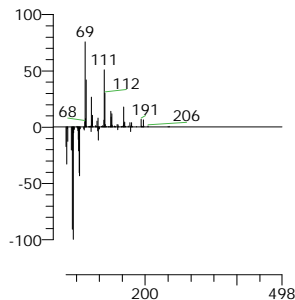

1-Octanol, 2-butyl-  
Formula C12H26O, MW 186, CAS# 3913-02-8, Entry# 22453  
2-Butyl-1-octanol

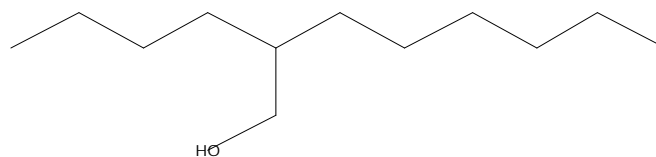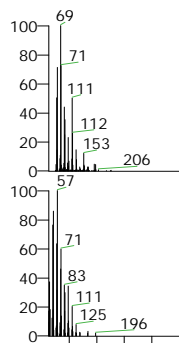

NL: 9.98E2  
62547 12.66 1 11  
22 2522-2532  
2562-2572 1.03E8 + c  
EI Full ms [50.00-500.00]

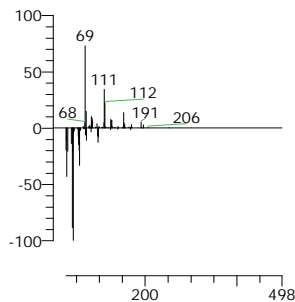

2-Ethyl-1-dodecanol  
Formula C14H30O, MW 214, CAS# 19780-33-7, Entry# 22421

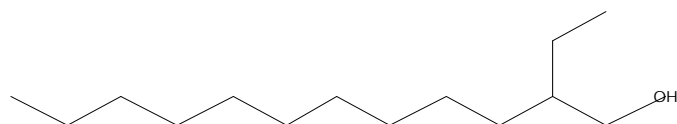



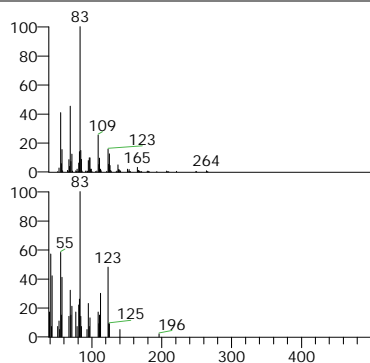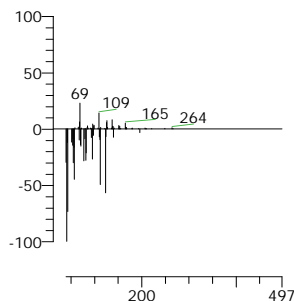

Cyclopropanol, 1-(3,7-dimethyl-1-octenyl)-  
Formula C<sub>13</sub>H<sub>24</sub>O, MW 196, CAS# 65147-72-0, Entry# 47465  
1-[(1E)-3,7-Dimethyl-1-octenyl]cyclopropanol #

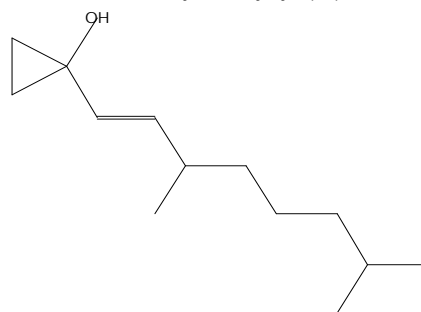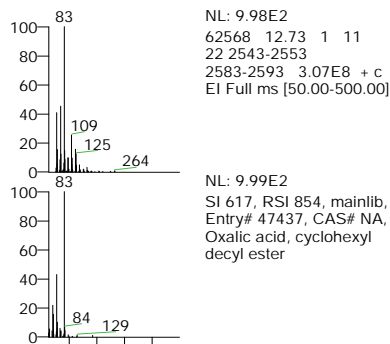

NL: 9.98E2  
62568 12.73 1 11  
22 2543-2553  
2583-2593 3.07E8 + c  
EI Full ms [50.00-500.00]

NL: 9.99E2  
SI 617, RSI 854, mainlib,  
Entry# 47437, CAS# NA,  
Oxalic acid, cyclohexyl  
decyl ester

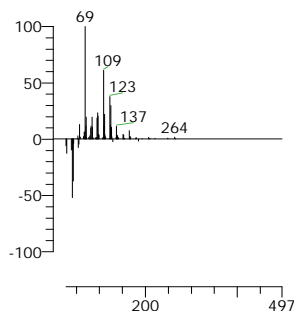

Oxalic acid, cyclohexyl decyl ester  
Formula C<sub>18</sub>H<sub>32</sub>O<sub>4</sub>, MW 312, CAS# NA, Entry# 47437

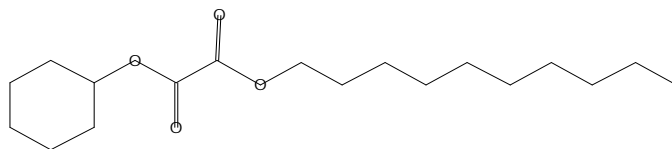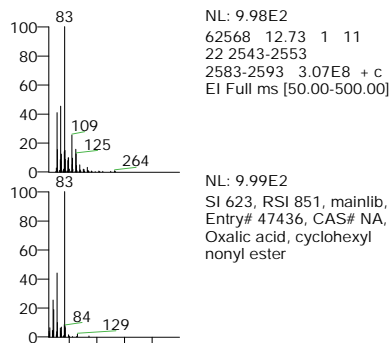

NL: 9.98E2  
62568 12.73 1 11  
22 2543-2553  
2583-2593 3.07E8 + c  
EI Full ms [50.00-500.00]

NL: 9.99E2  
SI 623, RSI 851, mainlib,  
Entry# 47436, CAS# NA,  
Oxalic acid, cyclohexyl  
nonyl ester

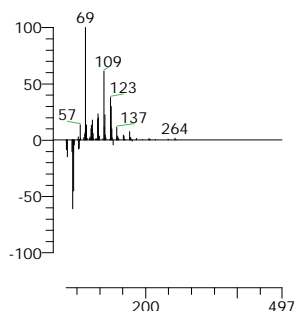

Oxalic acid, cyclohexyl nonyl ester  
Formula C<sub>17</sub>H<sub>30</sub>O<sub>4</sub>, MW 298, CAS# NA, Entry# 47436

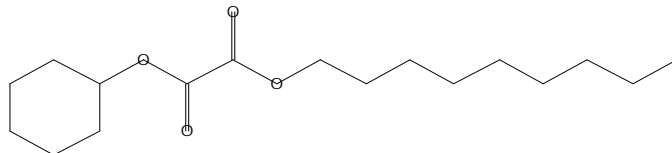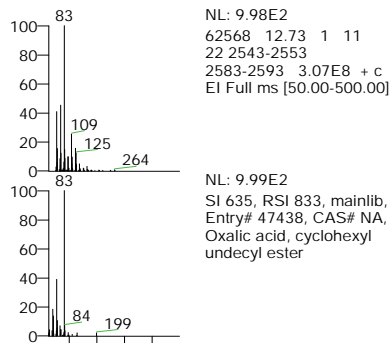

NL: 9.98E2  
62568 12.73 1 11  
22 2543-2553  
2583-2593 3.07E8 + c  
EI Full ms [50.00-500.00]

NL: 9.99E2  
SI 635, RSI 833, mainlib,  
Entry# 47438, CAS# NA,  
Oxalic acid, cyclohexyl  
undecyl ester

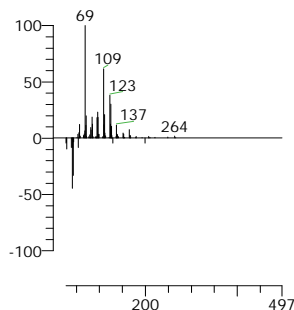

Oxalic acid, cyclohexyl undecyl ester  
Formula C<sub>19</sub>H<sub>34</sub>O<sub>4</sub>, MW 326, CAS# NA, Entry# 47438

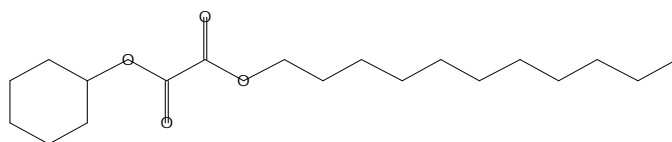



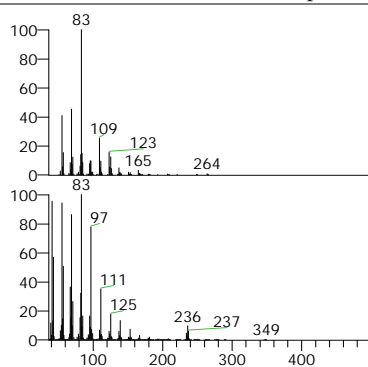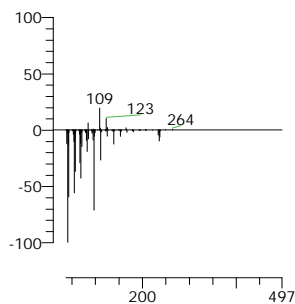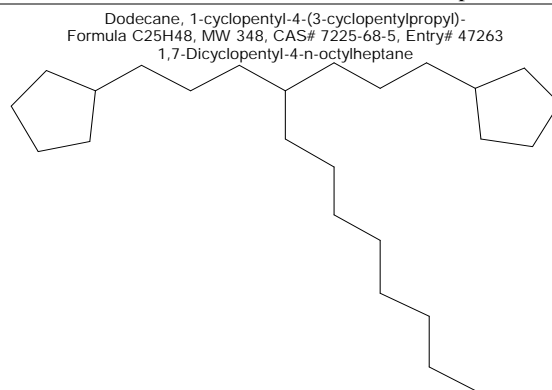

| RT    | Compound Name                              | Area       | Area % | RSI | Cas #      | Library |
|-------|--------------------------------------------|------------|--------|-----|------------|---------|
| 12.73 | Cyclopropanol, 1-(3,7-dimethyl-1-octenyl)- | 4480824939 | 2.37   | 872 | 65147-72-0 | mainlib |
| 12.73 | Oxalic acid, cyclohexyl decyl ester        | 4480824939 | 2.37   | 854 | NA         | mainlib |
| 12.73 | Oxalic acid, cyclohexyl nonyl ester        | 4480824939 | 2.37   | 851 | NA         | mainlib |

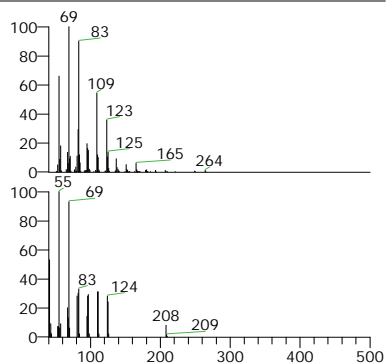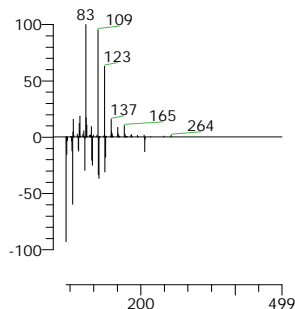

1-Cyclohexyl-1-(4-methylcyclohexyl)ethane  
Formula C<sub>15</sub>H<sub>28</sub>, MW 208, CAS# 2027-12-5, Entry# 18790

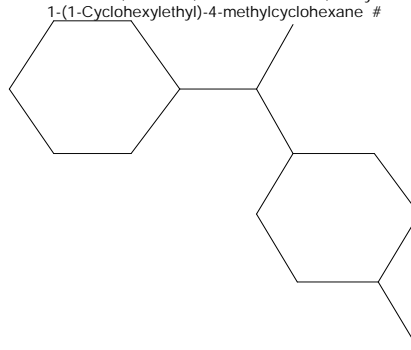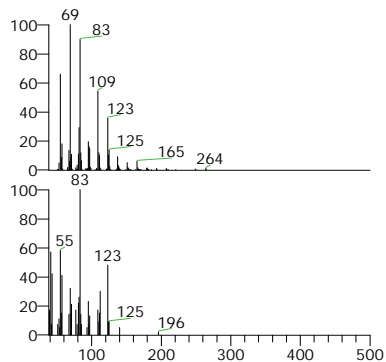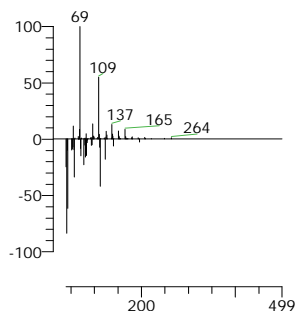

Cyclopropanol, 1-(3,7-dimethyl-1-octenyl)-  
Formula C<sub>13</sub>H<sub>24</sub>O, MW 196, CAS# 65147-72-0, Entry# 47465

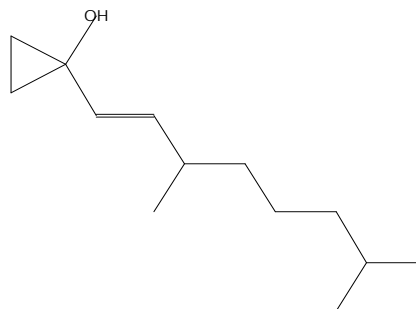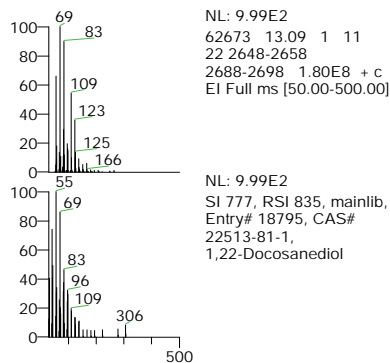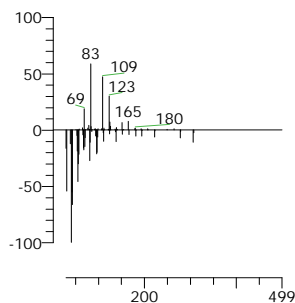

1,22-Docosanediol  
Formula C<sub>22</sub>H<sub>46</sub>O<sub>2</sub>, MW 342, CAS# 22513-81-1, Entry# 18795

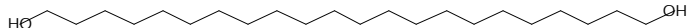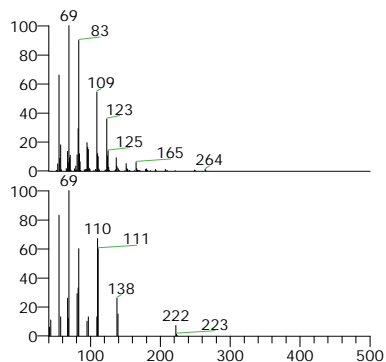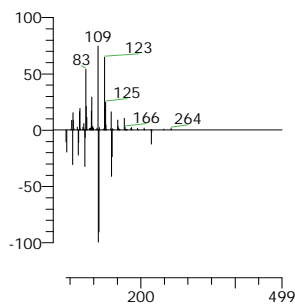

1-Cyclohexyl-1-(4-ethylcyclohexyl)ethane  
Formula C<sub>16</sub>H<sub>30</sub>, MW 222, CAS# 2027-13-6, Entry# 32150

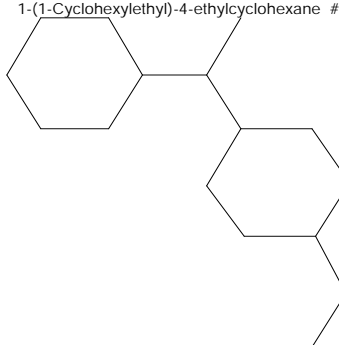

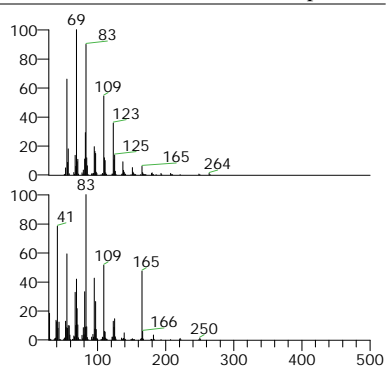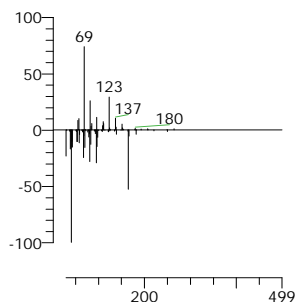

Borinic acid, diethyl-, 1-cyclododecen-1-yl ester  
 Formula C<sub>16</sub>H<sub>31</sub>BO, MW 250, CAS# 61142-73-2, Entry# 47268  
 1-Cyclododecen-1-yl diethylborinate #

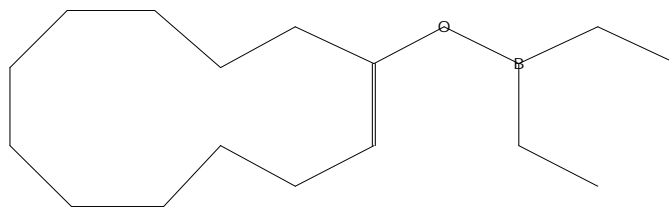

| RT    | Compound Name                              | Area       | Area % | RSI | Cas #      | Library |
|-------|--------------------------------------------|------------|--------|-----|------------|---------|
| 13.09 | 1-Cyclohexyl-1-(4-methylcyclohexyl)ethane  | 4106094629 | 2.17   | 885 | 2027-12-5  | mainlib |
| 13.09 | Cyclopropanol, 1-(3,7-dimethyl-1-octenyl)- | 4106094629 | 2.17   | 852 | 65147-72-0 | mainlib |
| 13.09 | 1,22-Docosanediol                          | 4106094629 | 2.17   | 835 | 22513-81-1 | mainlib |

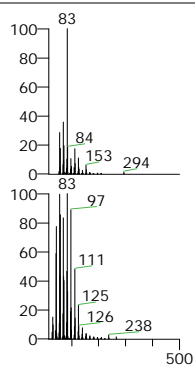

NL: 9.99E2  
63021 14.27 1 11  
22 2996-3006  
3036-3046 2.78E8 + c  
EI Full ms [50.00-500.00]

NL: 9.99E2  
SI 848, RSI 855, mainlib,  
Entry# 47640, CAS#  
1454-84-8,  
n-Nonadecanol-1

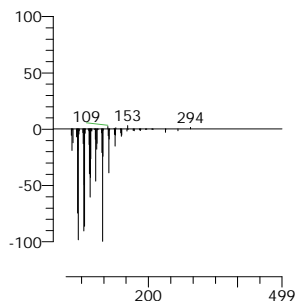

n-Nonadecanol-1  
Formula C19H40O, MW 284, CAS# 1454-84-8, Entry# 47640  
1-Nonadecanol

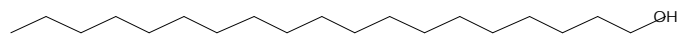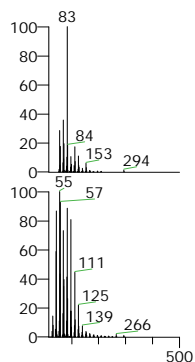

NL: 9.99E2  
63021 14.27 1 11  
22 2996-3006  
3036-3046 2.78E8 + c  
EI Full ms [50.00-500.00]

NL: 9.99E2  
SI 849, RSI 852, mainlib,  
Entry# 18669, CAS#  
15594-90-8,  
1-Heneicosanol

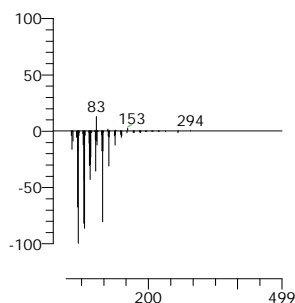

1-Heneicosanol  
Formula C21H44O, MW 312, CAS# 15594-90-8, Entry# 18669  
Henicosan-1-ol

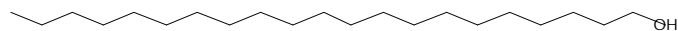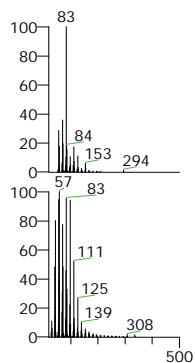

NL: 9.99E2  
63021 14.27 1 11  
22 2996-3006  
3036-3046 2.78E8 + c  
EI Full ms [50.00-500.00]

NL: 9.99E2  
SI 847, RSI 851, mainlib,  
Entry# 23874, CAS#  
506-51-4,  
n-Tetracosanol-1

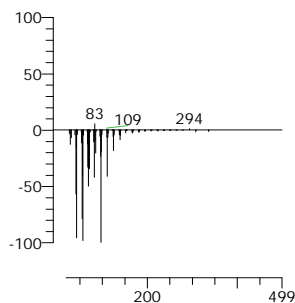

n-Tetracosanol-1  
Formula C24H50O, MW 354, CAS# 506-51-4, Entry# 23874  
Lignoceric alcohol

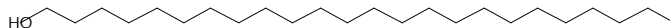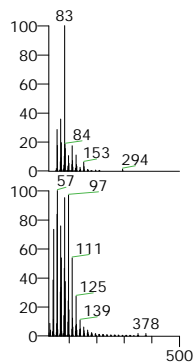

NL: 9.99E2  
63021 14.27 1 11  
22 2996-3006  
3036-3046 2.78E8 + c  
EI Full ms [50.00-500.00]

NL: 9.99E2  
SI 845, RSI 848, mainlib,  
Entry# 24212, CAS#  
2004-39-9,  
1-Heptacosanol

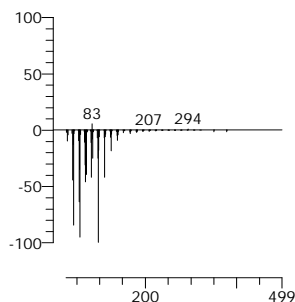

1-Heptacosanol  
Formula C27H56O, MW 396, CAS# 2004-39-9, Entry# 24212  
Heptacosan-1-ol

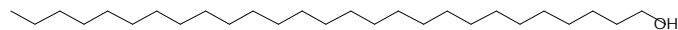

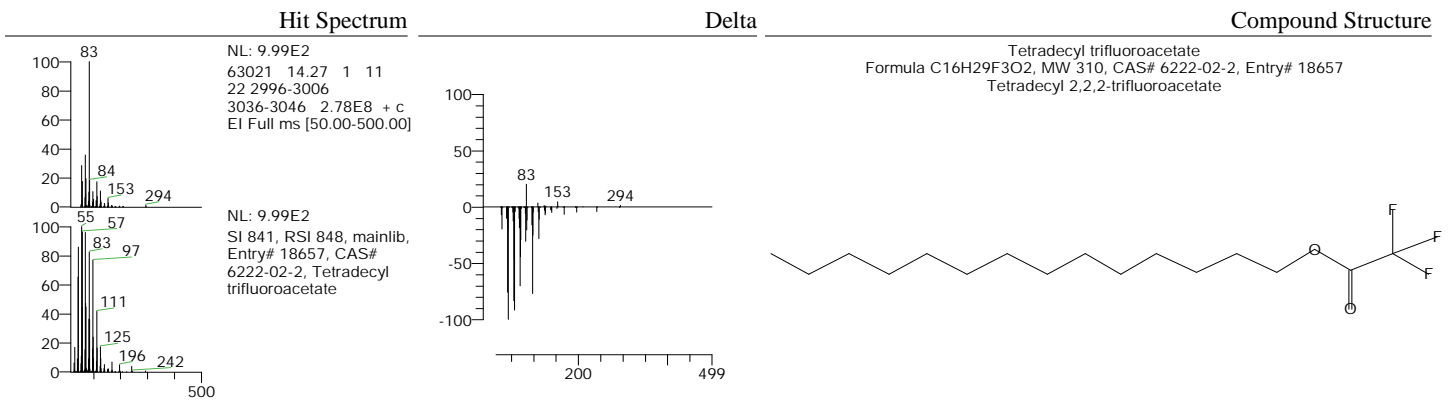

| RT    | Compound Name    | Area       | Area % | RSI | Cas #      | Library |
|-------|------------------|------------|--------|-----|------------|---------|
| 14.27 | n-Nonadecanol-1  | 3292963247 | 1.74   | 855 | 1454-84-8  | mainlib |
| 14.27 | 1-Heneicosanol   | 3292963247 | 1.74   | 852 | 15594-90-8 | mainlib |
| 14.27 | n-Tetracosanol-1 | 3292963247 | 1.74   | 851 | 506-51-4   | mainlib |

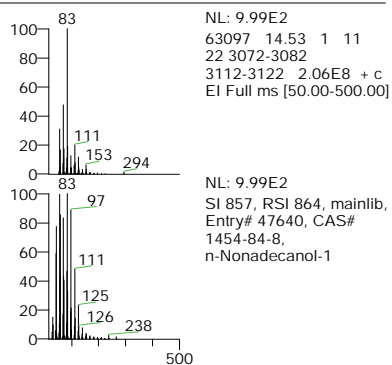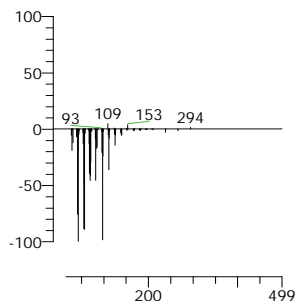

n-Nonadecanol-1  
Formula C19H40O, MW 284, CAS# 1454-84-8, Entry# 47640  
1-Nonadecanol

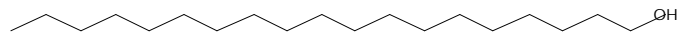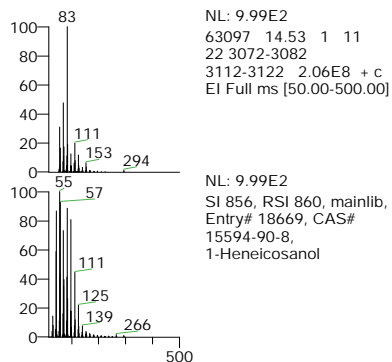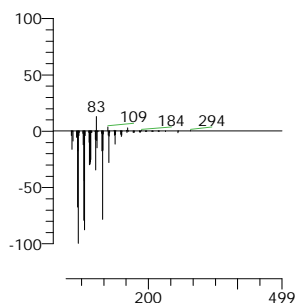

1-Heneicosanol  
Formula C21H44O, MW 312, CAS# 15594-90-8, Entry# 18669  
Henicosan-1-ol

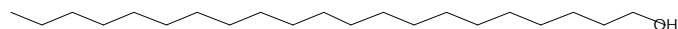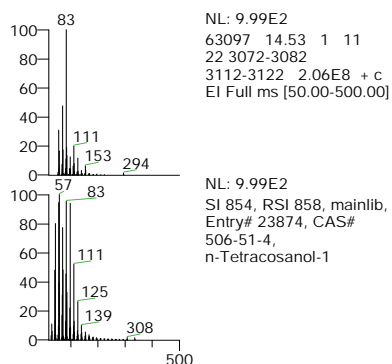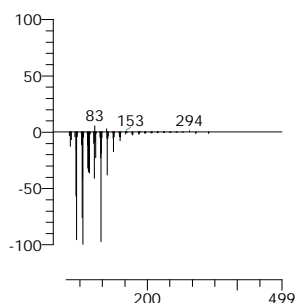

n-Tetracosanol-1  
Formula C24H50O, MW 354, CAS# 506-51-4, Entry# 23874  
Lignoceric alcohol

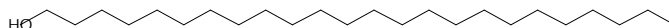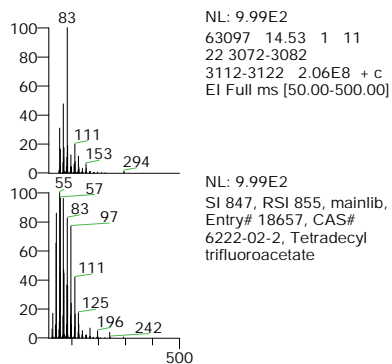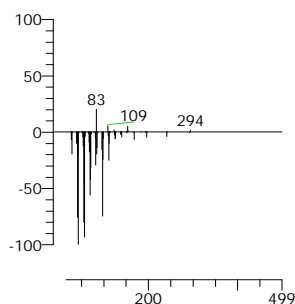

Tetradecyl trifluoroacetate  
Formula C16H29F3O2, MW 310, CAS# 6222-02-2, Entry# 18657  
Tetradecyl 2,2,2-trifluoroacetate

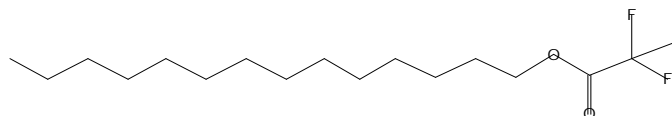

## Hit Spectrum

## Delta

## Compound Structure

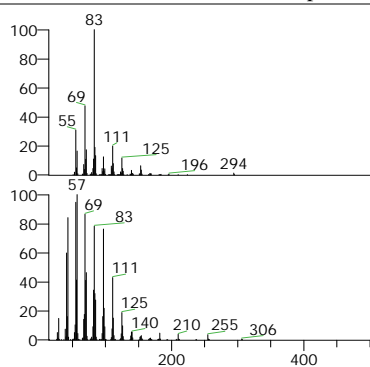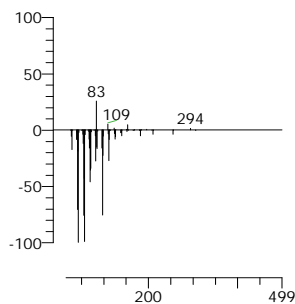

Trifluoroacetic acid, pentadecyl ester  
Formula C<sub>17</sub>H<sub>31</sub>F<sub>3</sub>O<sub>2</sub>, MW 324, CAS# 959010-23-2, Entry# 23039

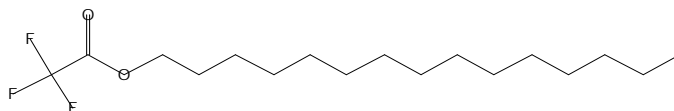

| RT    | Compound Name    | Area       | Area % | RSI | Cas #      | Library |
|-------|------------------|------------|--------|-----|------------|---------|
| 14.53 | n-Nonadecanol-1  | 2772367577 | 1.47   | 864 | 1454-84-8  | mainlib |
| 14.53 | 1-Heneicosanol   | 2772367577 | 1.47   | 860 | 15594-90-8 | mainlib |
| 14.53 | n-Tetracosanol-1 | 2772367577 | 1.47   | 858 | 506-51-4   | mainlib |

Analysed By:

Checked By:

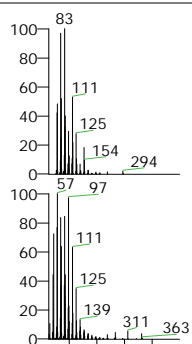

NL: 9.99E2  
63134 14.64 1 11  
22 3109-3119  
3149-3159 1.96E8 + c  
EI Full ms [50.00-500.00]

NL: 9.99E2  
SI 896, RSI 897, mainlib,  
Entry# 24208, CAS# NA,  
Nonadecyl  
trifluoroacetate

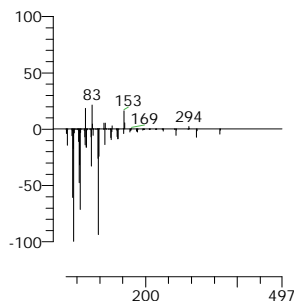

Nonadecyl trifluoroacetate  
Formula C<sub>21</sub>H<sub>39</sub>F<sub>3</sub>O<sub>2</sub>, MW 380, CAS# NA, Entry# 24208  
Nonadecyl 2,2,2-trifluoroacetate

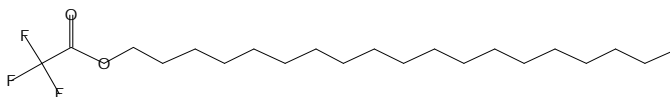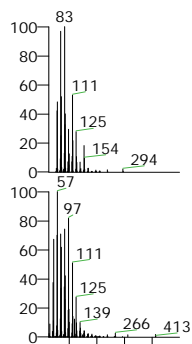

NL: 9.99E2  
63134 14.64 1 11  
22 3109-3119  
3149-3159 1.96E8 + c  
EI Full ms [50.00-500.00]

NL: 9.99E2  
SI 888, RSI 891, mainlib,  
Entry# 24210, CAS# NA,  
Nonadecyl  
pentafluoropropionate

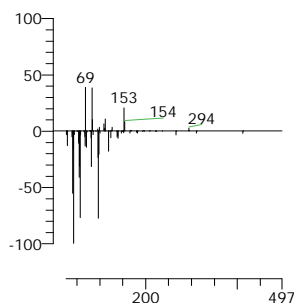

Nonadecyl pentafluoropropionate  
Formula C<sub>22</sub>H<sub>39</sub>F<sub>5</sub>O<sub>2</sub>, MW 430, CAS# NA, Entry# 24210  
Nonadecyl 2,2,3,3,3-pentafluoropropanoate

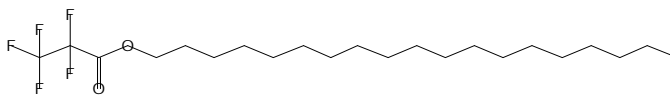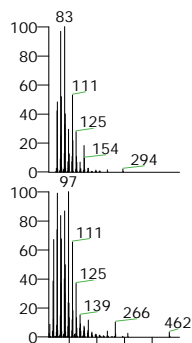

NL: 9.99E2  
63134 14.64 1 11  
22 3109-3119  
3149-3159 1.96E8 + c  
EI Full ms [50.00-500.00]

NL: 9.99E2  
SI 890, RSI 890, mainlib,  
Entry# 63582, CAS# NA,  
Nonadecyl  
heptafluorobutyrate

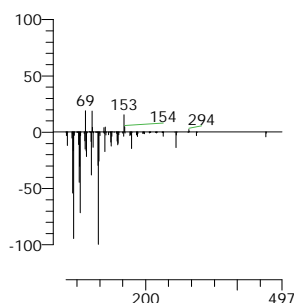

Nonadecyl heptafluorobutyrate  
Formula C<sub>23</sub>H<sub>39</sub>F<sub>7</sub>O<sub>2</sub>, MW 480, CAS# NA, Entry# 63582  
Nonadecyl 2,2,3,3,4,4,4-heptafluorobutanoate

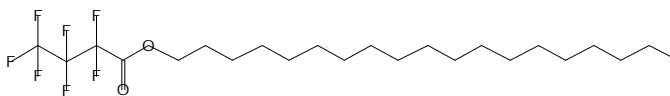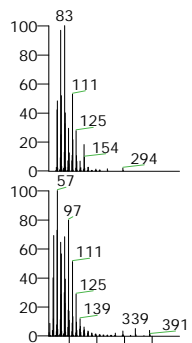

NL: 9.99E2  
63134 14.64 1 11  
22 3109-3119  
3149-3159 1.96E8 + c  
EI Full ms [50.00-500.00]

NL: 9.99E2  
SI 889, RSI 889, mainlib,  
Entry# 24192, CAS# NA,  
Heneicosyl  
trifluoroacetate

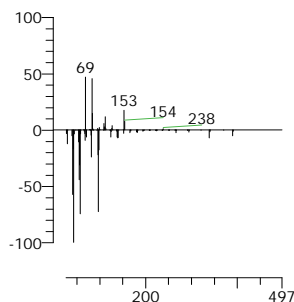

Heneicosyl trifluoroacetate  
Formula C<sub>23</sub>H<sub>43</sub>F<sub>3</sub>O<sub>2</sub>, MW 408, CAS# NA, Entry# 24192  
Heneicosyl 2,2,2-trifluoroacetate

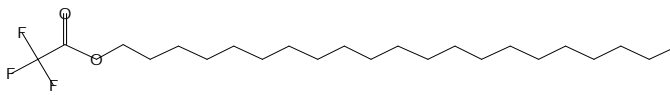



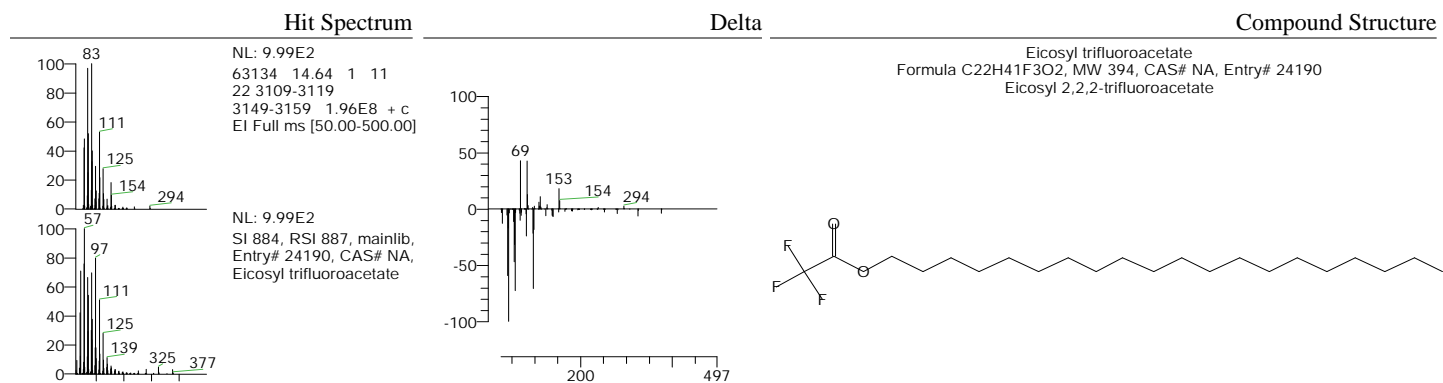

| RT    | Compound Name                   | Area       | Area % | RSI | Cas # | Library |
|-------|---------------------------------|------------|--------|-----|-------|---------|
| 14.64 | Nonadecyl trifluoroacetate      | 5626251068 | 2.98   | 897 | NA    | mainlib |
| 14.64 | Nonadecyl pentafluoropropionate | 5626251068 | 2.98   | 891 | NA    | mainlib |
| 14.64 | Nonadecyl heptafluorobutyrate   | 5626251068 | 2.98   | 890 | NA    | mainlib |

Analysed By:

Checked By:

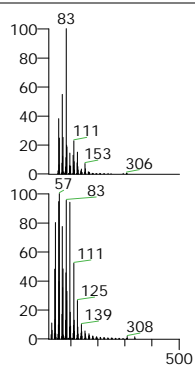

NL: 9.99E2  
63156 14.73 1 11  
22 3131-3141  
3171-3181 2.43E8 + c  
EI Full ms [50.00-500.00]

NL: 9.99E2  
SI 869, RSI 871, mainlib,  
Entry# 23874, CAS#  
506-51-4,  
n-Tetracosanol-1

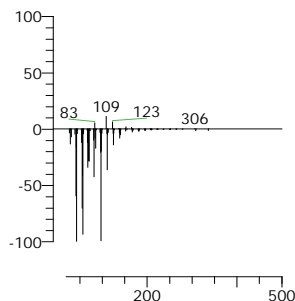

n-Tetracosanol-1  
Formula C<sub>24</sub>H<sub>50</sub>O, MW 354, CAS# 506-51-4, Entry# 23874  
Lignoceric alcohol

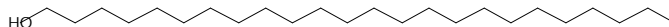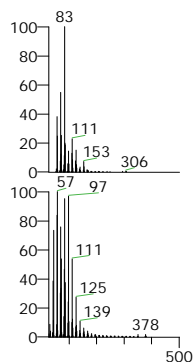

NL: 9.99E2  
63156 14.73 1 11  
22 3131-3141  
3171-3181 2.43E8 + c  
EI Full ms [50.00-500.00]

NL: 9.99E2  
SI 869, RSI 870, mainlib,  
Entry# 24212, CAS#  
2004-39-9,  
1-Heptacosanol

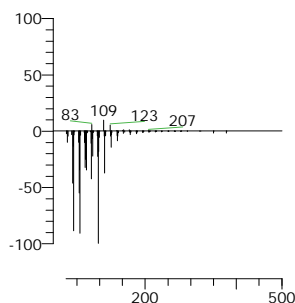

1-Heptacosanol  
Formula C<sub>27</sub>H<sub>56</sub>O, MW 396, CAS# 2004-39-9, Entry# 24212  
Heptacosan-1-ol

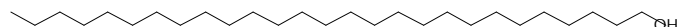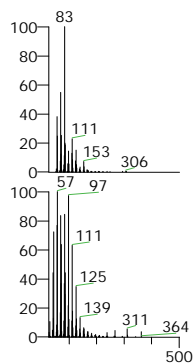

NL: 9.99E2  
63156 14.73 1 11  
22 3131-3141  
3171-3181 2.43E8 + c  
EI Full ms [50.00-500.00]

NL: 9.99E2  
SI 865, RSI 867, mainlib,  
Entry# 24208, CAS# NA,  
Nonadecyl  
trifluoroacetate

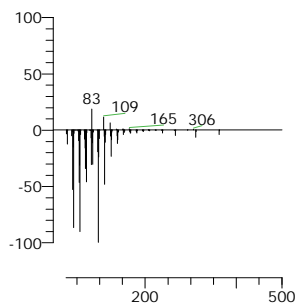

Nonadecyl trifluoroacetate  
Formula C<sub>21</sub>H<sub>39</sub>F<sub>3</sub>O<sub>2</sub>, MW 380, CAS# NA, Entry# 24208  
Nonadecyl 2,2,2-trifluoroacetate

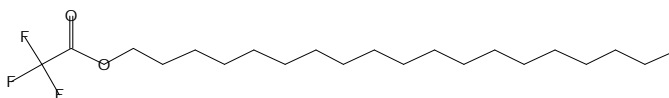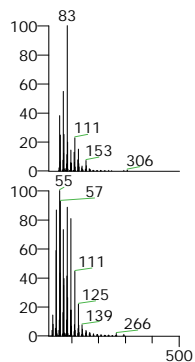

NL: 9.99E2  
63156 14.73 1 11  
22 3131-3141  
3171-3181 2.43E8 + c  
EI Full ms [50.00-500.00]

NL: 9.99E2  
SI 864, RSI 867, mainlib,  
Entry# 18669, CAS#  
15594-90-8,  
1-Heneicosanol

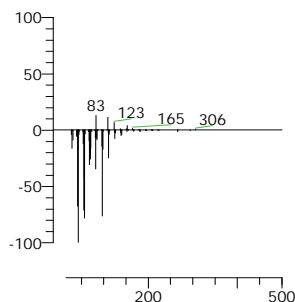

1-Heneicosanol  
Formula C<sub>21</sub>H<sub>44</sub>O, MW 312, CAS# 15594-90-8, Entry# 18669  
Henicosan-1-ol

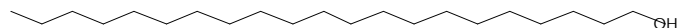

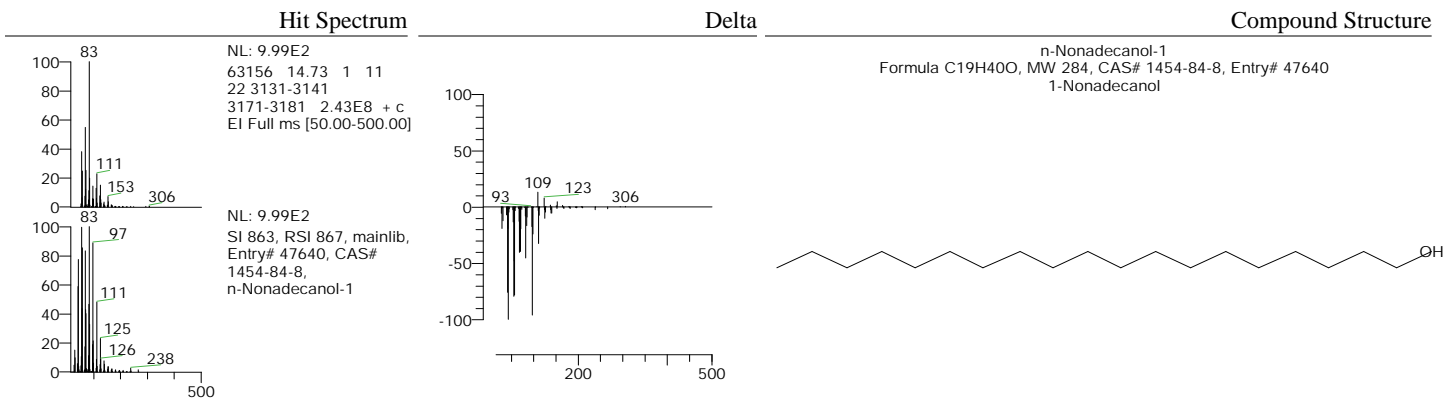

| RT    | Compound Name              | Area       | Area % | RSI | Cas #     | Library |
|-------|----------------------------|------------|--------|-----|-----------|---------|
| 14.73 | n-Tetracosanol-1           | 3025208575 | 1.60   | 871 | 506-51-4  | mainlib |
| 14.73 | 1-Heptacosanol             | 3025208575 | 1.60   | 870 | 2004-39-9 | mainlib |
| 14.73 | Nonadecyl trifluoroacetate | 3025208575 | 1.60   | 867 | NA        | mainlib |

Analysed By:

Checked By:

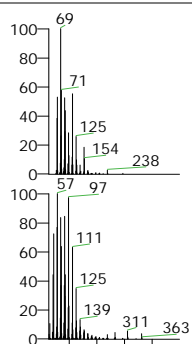

NL: 9.99E2  
63215 14.94 1 11  
22.3190-3200  
3230-3240 2.04E8 + c  
EI Full ms [50.00-500.00]

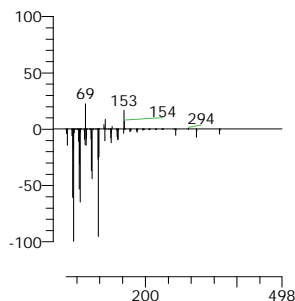

Nonadecyl trifluoroacetate  
Formula C<sub>21</sub>H<sub>39</sub>F<sub>3</sub>O<sub>2</sub>, MW 380, CAS# NA, Entry# 24208  
Nonadecyl 2,2,2-trifluoroacetate

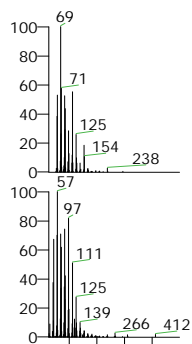

NL: 9.99E2  
63215 14.94 1 11  
22.3190-3200  
3230-3240 2.04E8 + c  
EI Full ms [50.00-500.00]

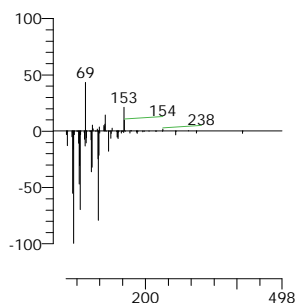

Nonadecyl pentafluoropropionate  
Formula C<sub>22</sub>H<sub>39</sub>F<sub>5</sub>O<sub>2</sub>, MW 430, CAS# NA, Entry# 24210  
Nonadecyl 2,2,3,3,3-pentafluoropropanoate

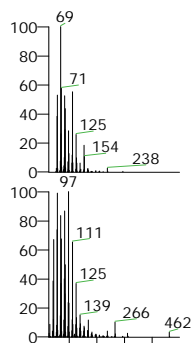

NL: 9.99E2  
63215 14.94 1 11  
22.3190-3200  
3230-3240 2.04E8 + c  
EI Full ms [50.00-500.00]

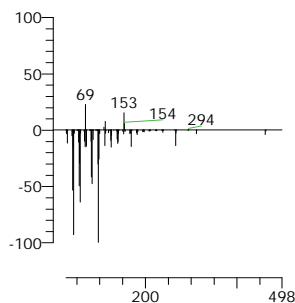

Nonadecyl heptafluorobutyrate  
Formula C<sub>23</sub>H<sub>39</sub>F<sub>7</sub>O<sub>2</sub>, MW 480, CAS# NA, Entry# 63582  
Nonadecyl 2,2,3,3,4,4,4-heptafluorobutanoate

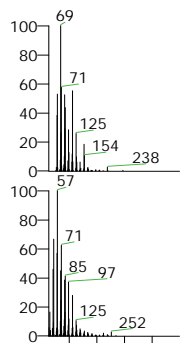

NL: 9.99E2  
63215 14.94 1 11  
22.3190-3200  
3230-3240 2.04E8 + c  
EI Full ms [50.00-500.00]

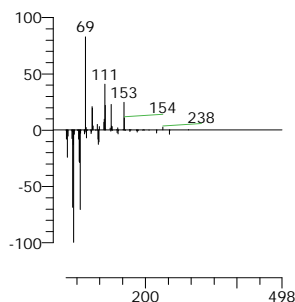

1-Dodecanol, 2-hexyl-  
Formula C<sub>18</sub>H<sub>38</sub>O, MW 270, CAS# 110225-00-8, Entry# 22630  
2-Hexyldodecan-1-ol

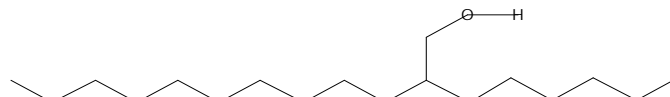

## Hit Spectrum

## Delta

## Compound Structure

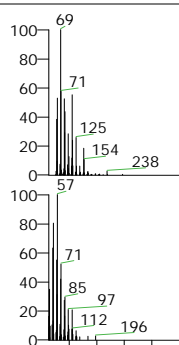

NL: 9.99E2  
63215 14.94 1 11  
22 3190-3200  
3230-3240 2.04E8 + c  
EI Full ms [50.00-500.00]

NL: 9.99E2  
SI 813, RSI 882, mainlib,  
Entry# 22406, CAS#  
19780-79-1,  
2-Hexyl-1-octanol

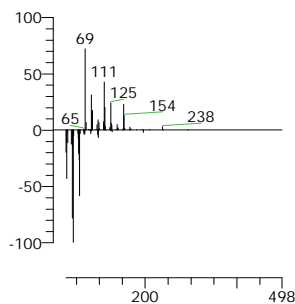

2-Hexyl-1-octanol  
Formula C<sub>14</sub>H<sub>30</sub>O, MW 214, CAS# 19780-79-1, Entry# 22406

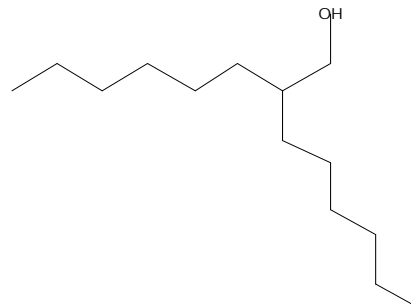

| RT    | Compound Name                   | Area       | Area % | RSI | Cas # | Library |
|-------|---------------------------------|------------|--------|-----|-------|---------|
| 14.94 | Nonadecyl trifluoroacetate      | 8290070338 | 4.39   | 892 | NA    | mainlib |
| 14.94 | Nonadecyl pentafluoropropionate | 8290070338 | 4.39   | 886 | NA    | mainlib |
| 14.94 | Nonadecyl heptafluorobutyrate   | 8290070338 | 4.39   | 885 | NA    | mainlib |

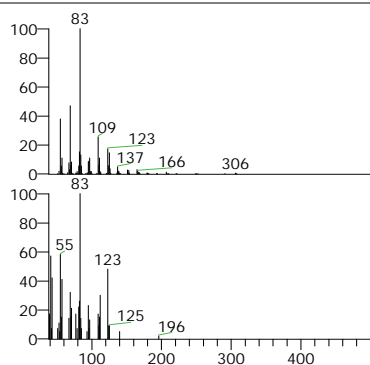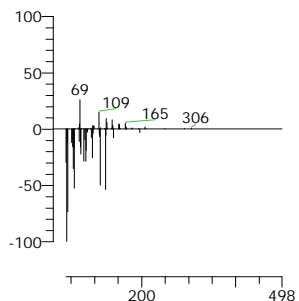

Cyclopropanol, 1-(3,7-dimethyl-1-octenyl)-  
Formula C<sub>13</sub>H<sub>24</sub>O, MW 196, CAS# 65147-72-0, Entry# 47465  
1-[(1E)-3,7-Dimethyl-1-octenyl]cyclopropanol #

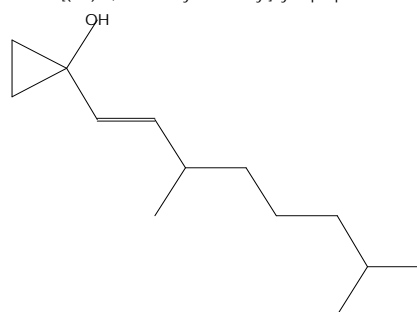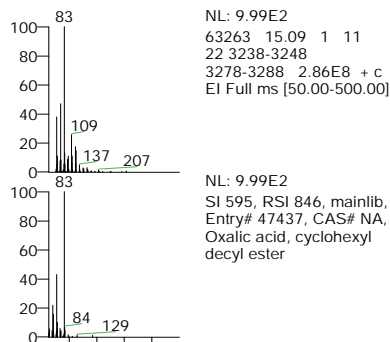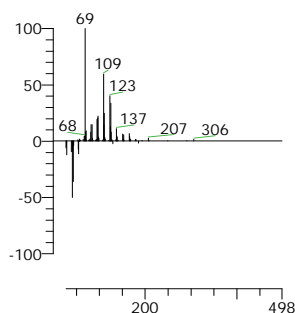

Oxalic acid, cyclohexyl decyl ester  
Formula C<sub>18</sub>H<sub>32</sub>O<sub>4</sub>, MW 312, CAS# NA, Entry# 47437

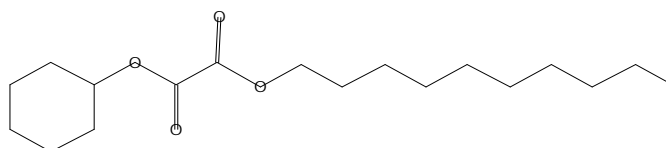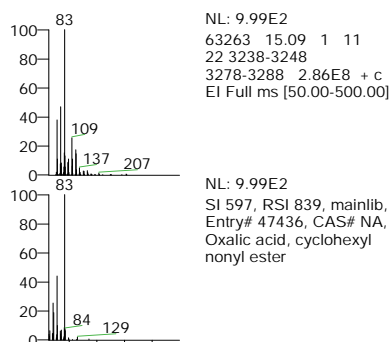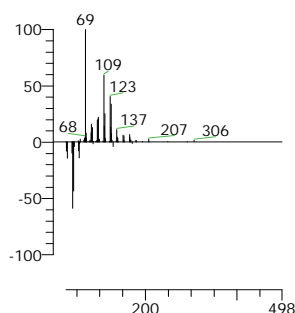

Oxalic acid, cyclohexyl nonyl ester  
Formula C<sub>17</sub>H<sub>30</sub>O<sub>4</sub>, MW 298, CAS# NA, Entry# 47436

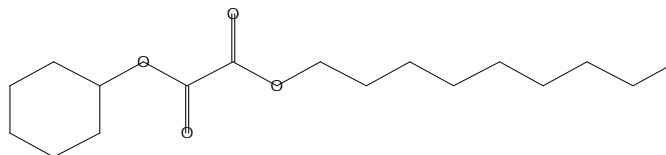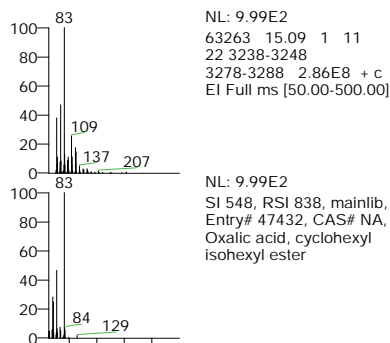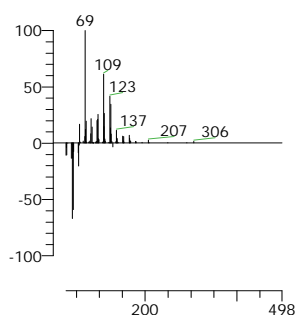

Oxalic acid, cyclohexyl isohexyl ester  
Formula C<sub>14</sub>H<sub>24</sub>O<sub>4</sub>, MW 256, CAS# NA, Entry# 47432

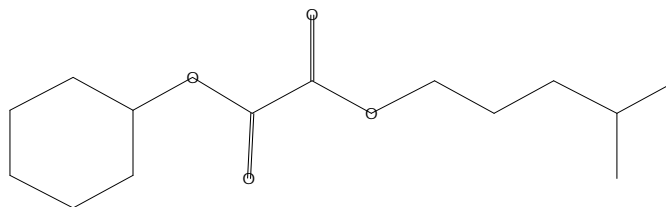

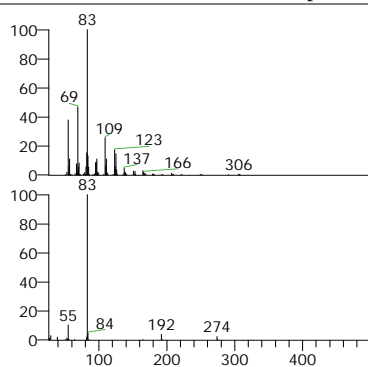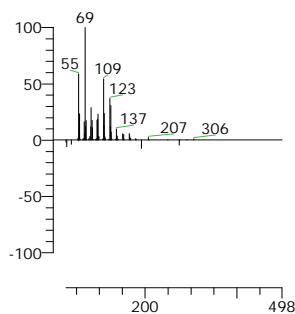

1,3-Benzenediol, O,O'-di(3-methylbut-2-en-1-yl)-  
Formula C<sub>16</sub>H<sub>18</sub>O<sub>4</sub>, MW 274, CAS# NA, Entry# 47620

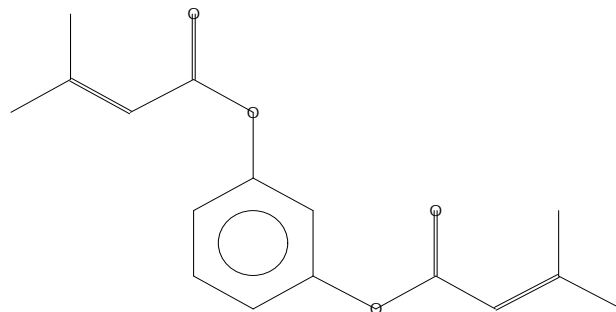

| RT    | Compound Name                              | Area       | Area % | RSI | Cas #      | Library |
|-------|--------------------------------------------|------------|--------|-----|------------|---------|
| 15.09 | Cyclopropanol, 1-(3,7-dimethyl-1-octenyl)- | 3719941710 | 1.97   | 857 | 65147-72-0 | mainlib |
| 15.09 | Oxalic acid, cyclohexyl decyl ester        | 3719941710 | 1.97   | 846 | NA         | mainlib |
| 15.09 | Oxalic acid, cyclohexyl nonyl ester        | 3719941710 | 1.97   | 839 | NA         | mainlib |

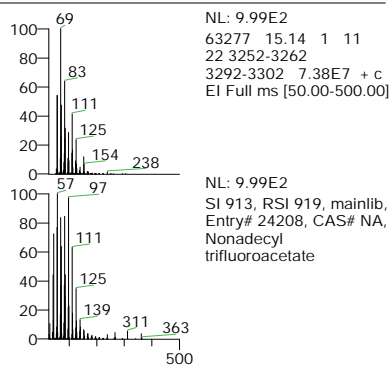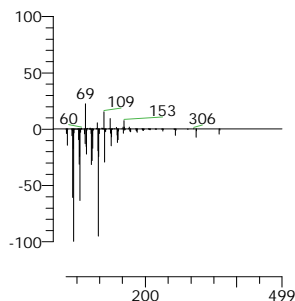

Nonadecyl trifluoroacetate  
Formula C<sub>21</sub>H<sub>39</sub>F<sub>3</sub>O<sub>2</sub>, MW 380, CAS# NA, Entry# 24208  
Nonadecyl 2,2,2-trifluoroacetate

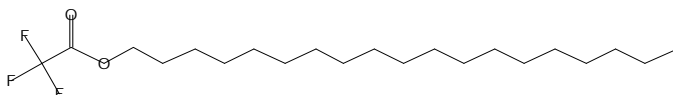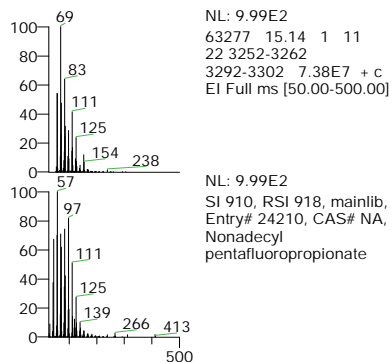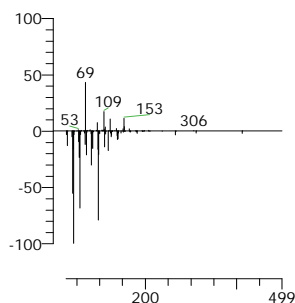

Nonadecyl pentafluoropropionate  
Formula C<sub>22</sub>H<sub>39</sub>F<sub>5</sub>O<sub>2</sub>, MW 430, CAS# NA, Entry# 24210  
Nonadecyl 2,2,3,3,3-pentafluoropropanoate

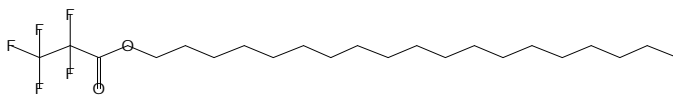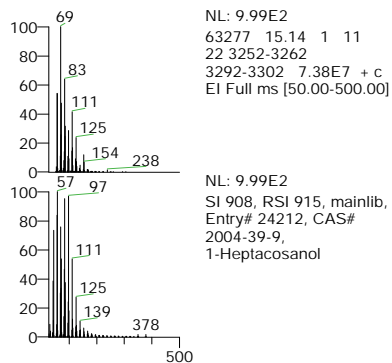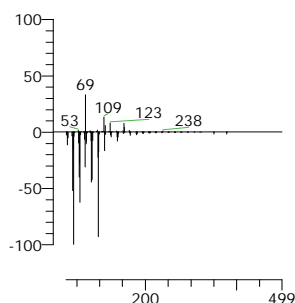

1-Heptacosanol  
Formula C<sub>27</sub>H<sub>56</sub>O, MW 396, CAS# 2004-39-9, Entry# 24212  
Heptacosan-1-ol

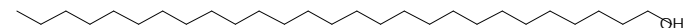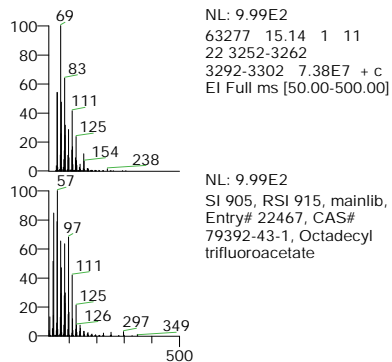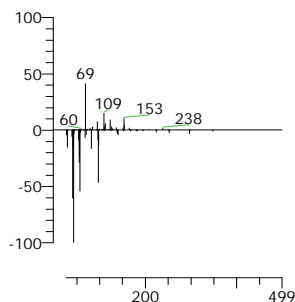

Octadecyl trifluoroacetate  
Formula C<sub>20</sub>H<sub>37</sub>F<sub>3</sub>O<sub>2</sub>, MW 366, CAS# 79392-43-1, Entry# 22467  
Octadecyl 2,2,2-trifluoroacetate

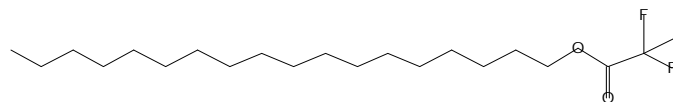



## Hit Spectrum

## Delta

## Compound Structure

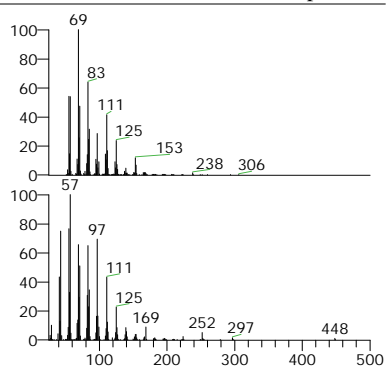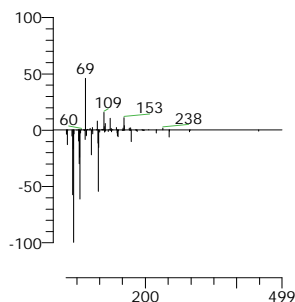

Heptafluorobutyric acid, n-octadecyl ester  
 Formula C<sub>22</sub>H<sub>37</sub>F<sub>7</sub>O<sub>2</sub>, MW 466, CAS# 400-57-7, Entry# 23005  
 Octadecyl 2,2,3,3,4,4,4-heptafluorobutanoate #

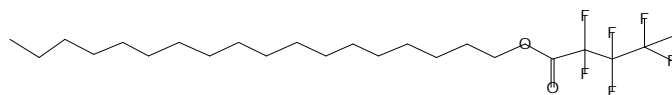

| RT    | Compound Name                   | Area       | Area % | RSI | Cas #     | Library |
|-------|---------------------------------|------------|--------|-----|-----------|---------|
| 15.14 | Nonadecyl trifluoroacetate      | 1317781054 | 0.70   | 919 | NA        | mainlib |
| 15.14 | Nonadecyl pentafluoropropionate | 1317781054 | 0.70   | 918 | NA        | mainlib |
| 15.14 | 1-Heptacosanol                  | 1317781054 | 0.70   | 915 | 2004-39-9 | mainlib |

Analysed By:

Checked By:

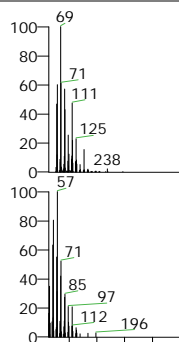

NL: 9.99E2  
63313 15.26 1 11  
22 3288-3298  
3328-3338 1.45E8 + c  
EI Full ms [50.00-500.00]

NL: 9.99E2  
SI 829, RSI 908, mainlib,  
Entry# 22406, CAS#  
19780-79-1,  
2-Hexyl-1-octanol

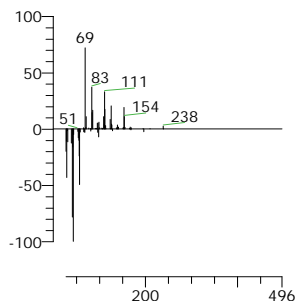

2-Hexyl-1-octanol  
Formula C14H30O, MW 214, CAS# 19780-79-1, Entry# 22406

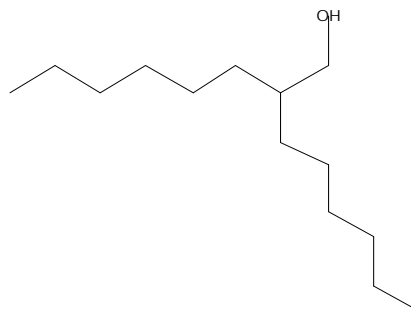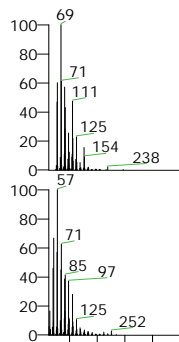

NL: 9.99E2  
63313 15.26 1 11  
22 3288-3298  
3328-3338 1.45E8 + c  
EI Full ms [50.00-500.00]

NL: 9.99E2  
SI 900, RSI 902, mainlib,  
Entry# 22630, CAS#  
110225-00-8,  
1-Dodecanol, 2-hexyl-

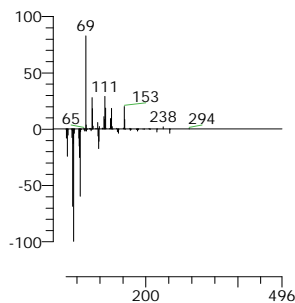

1-Dodecanol, 2-hexyl-  
2-Hexyldodecan-1-ol  
Formula C18H38O, MW 270, CAS# 110225-00-8, Entry# 22630

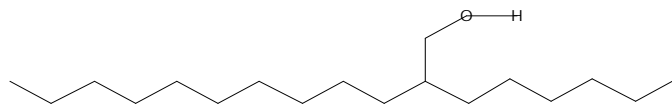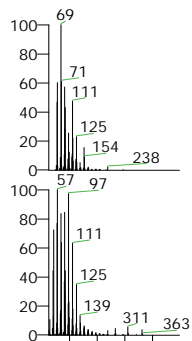

NL: 9.99E2  
63313 15.26 1 11  
22 3288-3298  
3328-3338 1.45E8 + c  
EI Full ms [50.00-500.00]

NL: 9.99E2  
SI 896, RSI 900, mainlib,  
Entry# 24208, CAS# NA,  
Nonadecyl  
trifluoroacetate

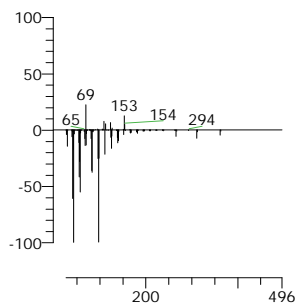

Nonadecyl trifluoroacetate  
Formula C21H39F3O2, MW 380, CAS# NA, Entry# 24208  
Nonadecyl 2,2,2-trifluoroacetate

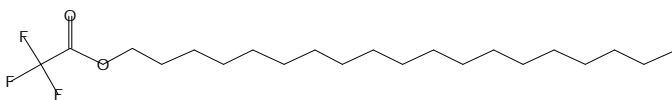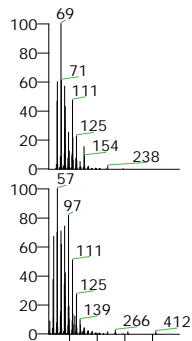

NL: 9.99E2  
63313 15.26 1 11  
22 3288-3298  
3328-3338 1.45E8 + c  
EI Full ms [50.00-500.00]

NL: 9.99E2  
SI 891, RSI 896, mainlib,  
Entry# 24210, CAS# NA,  
Nonadecyl  
pentafluoropropionate

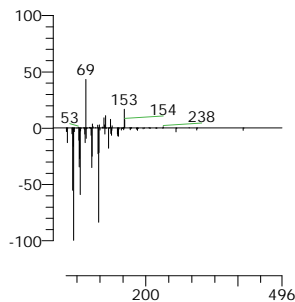

Nonadecyl pentafluoropropionate  
Formula C22H39F5O2, MW 430, CAS# NA, Entry# 24210  
Nonadecyl 2,2,3,3,3-pentafluoropropanoate

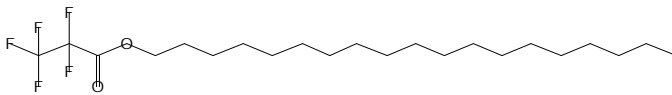

## Hit Spectrum

## Delta

## Compound Structure

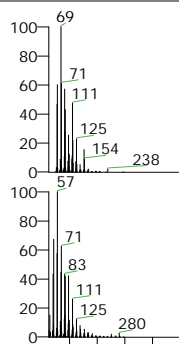

NL: 9.99E2  
 63313 15.26 1 11  
 22 3288-3298  
 3328-3338 1.45E8 + c  
 EI Full ms [50.00-500.00]

NL: 9.99E2  
 SI 893, RSI 895, mainlib,  
 Entry# 22667, CAS#  
 5333-42-6, 1-Dodecanol,  
 2-octyl-

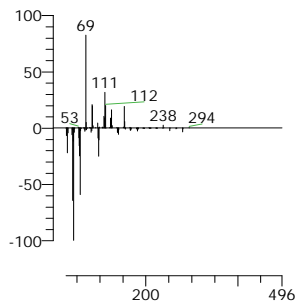

1-Dodecanol, 2-octyl-  
 Formula C<sub>20</sub>H<sub>42</sub>O, MW 298, CAS# 5333-42-6, Entry# 22667  
 Eutanol G

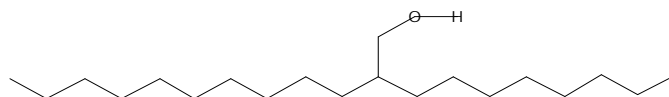

| RT    | Compound Name              | Area       | Area % | RSI | Cas #       | Library |
|-------|----------------------------|------------|--------|-----|-------------|---------|
| 15.26 | 2-Hexyl-1-octanol          | 3383899138 | 1.79   | 908 | 19780-79-1  | mainlib |
| 15.26 | 1-Dodecanol, 2-hexyl-      | 3383899138 | 1.79   | 902 | 110225-00-8 | mainlib |
| 15.26 | Nonadecyl trifluoroacetate | 3383899138 | 1.79   | 900 | NA          | mainlib |

Analysed By:

Checked By:

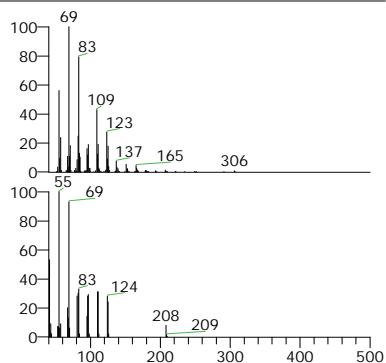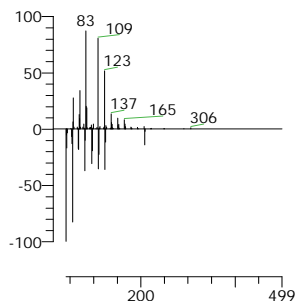

1-Cyclohexyl-1-(4-methylcyclohexyl)ethane  
Formula C<sub>15</sub>H<sub>28</sub>, MW 208, CAS# 2027-12-5, Entry# 18790  
1-(1-Cyclohexylethyl)-4-methylcyclohexane #

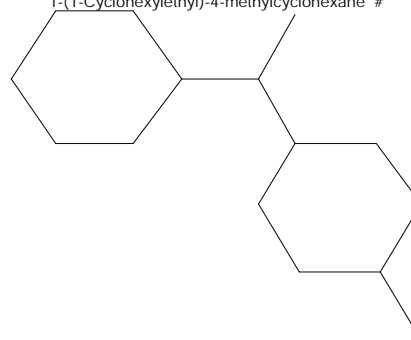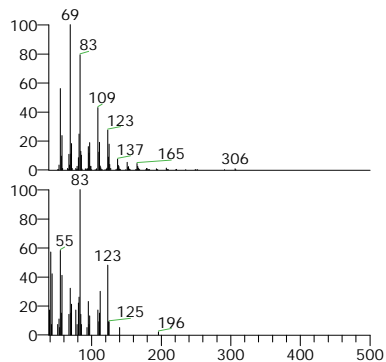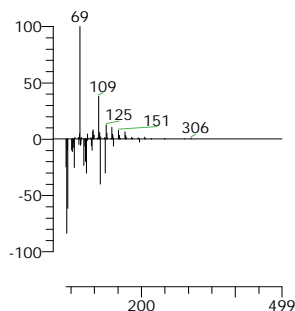

Cyclopropanol, 1-(3,7-dimethyl-1-octenyl)-  
Formula C<sub>13</sub>H<sub>24</sub>O, MW 196, CAS# 65147-72-0, Entry# 47465  
1-[(1E)-3,7-Dimethyl-1-octenyl]cyclopropanol #

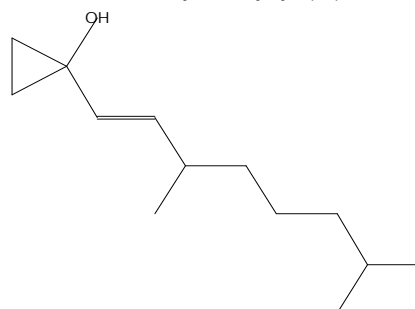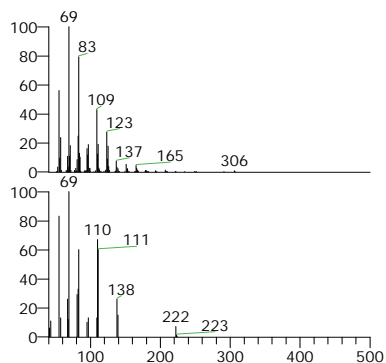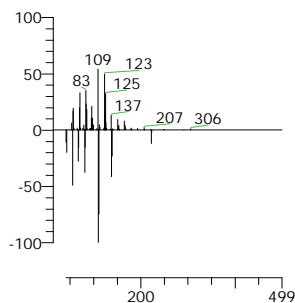

1-Cyclohexyl-1-(4-ethylcyclohexyl)ethane  
Formula C<sub>16</sub>H<sub>30</sub>, MW 222, CAS# 2027-13-6, Entry# 32150  
1-(1-Cyclohexylethyl)-4-ethylcyclohexane #

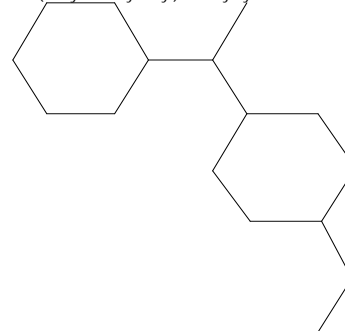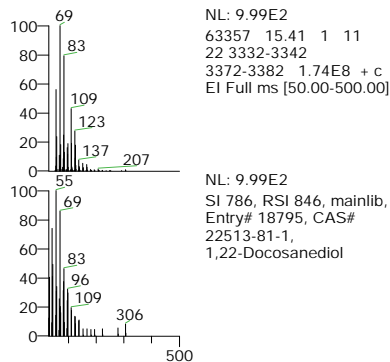

NL: 9.99E2  
63357 15.41 1 11  
22 3332-3342  
3372-3382 1.74E8 + c  
EI Full ms [50.00-500.00]

NL: 9.99E2  
SI 786, RSI 846, mainlib,  
Entry# 18795, CAS#  
22513-81-1,  
1,22-Docosanediol

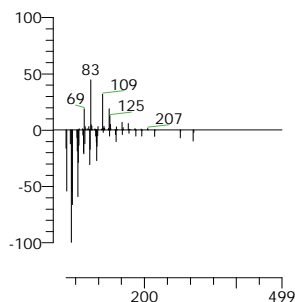

1,22-Docosanediol  
Formula C<sub>22</sub>H<sub>46</sub>O<sub>2</sub>, MW 342, CAS# 22513-81-1, Entry# 18795

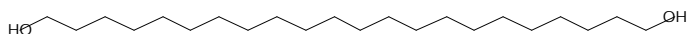

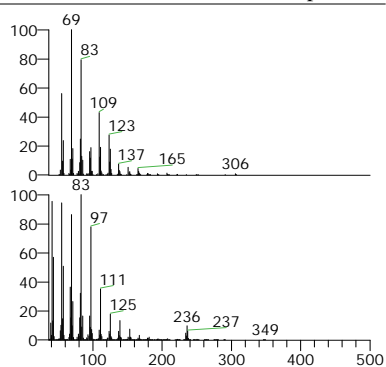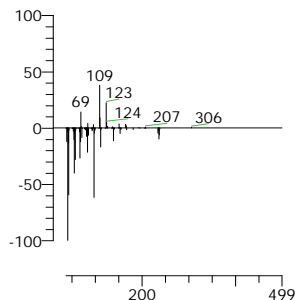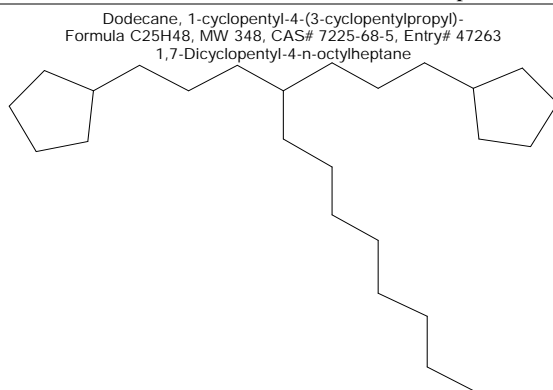

| RT    | Compound Name                              | Area       | Area % | RSI | Cas #      | Library |
|-------|--------------------------------------------|------------|--------|-----|------------|---------|
| 15.41 | 1-Cyclohexyl-1-(4-methylcyclohexyl)ethane  | 3132137554 | 1.66   | 880 | 2027-12-5  | mainlib |
| 15.41 | Cyclopropanol, 1-(3,7-dimethyl-1-octenyl)- | 3132137554 | 1.66   | 857 | 65147-72-0 | mainlib |
| 15.41 | 1-Cyclohexyl-1-(4-ethylcyclohexyl)ethane   | 3132137554 | 1.66   | 855 | 2027-13-6  | mainlib |

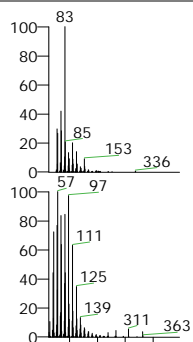

NL: 9.99E2  
63656 16.43 1 11  
22 3631-3641  
3671-3681 1.59E8 + c  
EI Full ms [50.00-500.00]

NL: 9.99E2  
SI 872, RSI 875, mainlib,  
Entry# 24208, CAS# NA,  
Nonadecyl  
trifluoroacetate

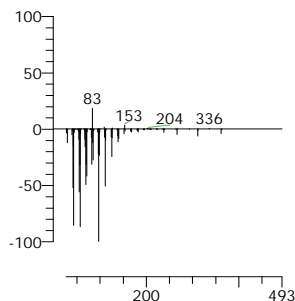

Nonadecyl trifluoroacetate  
Formula C<sub>21</sub>H<sub>39</sub>F<sub>3</sub>O<sub>2</sub>, MW 380, CAS# NA, Entry# 24208  
Nonadecyl 2,2,2-trifluoroacetate

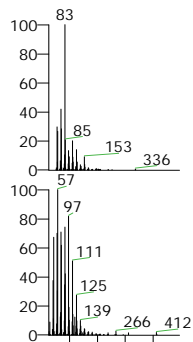

NL: 9.99E2  
63656 16.43 1 11  
22 3631-3641  
3671-3681 1.59E8 + c  
EI Full ms [50.00-500.00]

NL: 9.99E2  
SI 871, RSI 875, mainlib,  
Entry# 24210, CAS# NA,  
Nonadecyl  
pentafluoropropionate

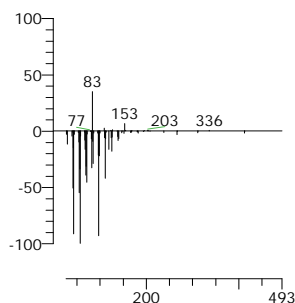

Nonadecyl pentafluoropropionate  
Formula C<sub>22</sub>H<sub>39</sub>F<sub>5</sub>O<sub>2</sub>, MW 430, CAS# NA, Entry# 24210  
Nonadecyl 2,2,3,3,3-pentafluoropropanoate

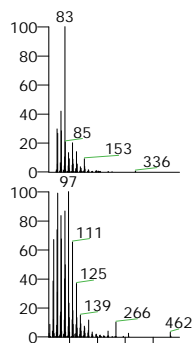

NL: 9.99E2  
63656 16.43 1 11  
22 3631-3641  
3671-3681 1.59E8 + c  
EI Full ms [50.00-500.00]

NL: 9.99E2  
SI 870, RSI 873, mainlib,  
Entry# 63582, CAS# NA,  
Nonadecyl  
heptafluorobutyrate

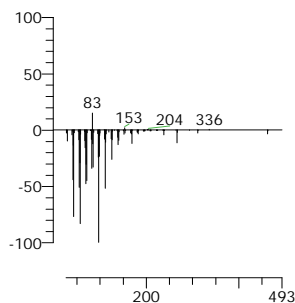

Nonadecyl heptafluorobutyrate  
Formula C<sub>23</sub>H<sub>39</sub>F<sub>7</sub>O<sub>2</sub>, MW 480, CAS# NA, Entry# 63582  
Nonadecyl 2,2,3,3,4,4,4-heptafluorobutanoate

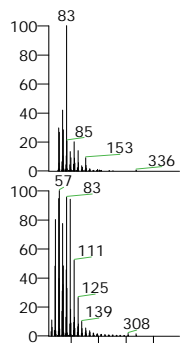

NL: 9.99E2  
63656 16.43 1 11  
22 3631-3641  
3671-3681 1.59E8 + c  
EI Full ms [50.00-500.00]

NL: 9.99E2  
SI 870, RSI 872, mainlib,  
Entry# 23874, CAS#  
506-51-4,  
n-Tetracosanol-1

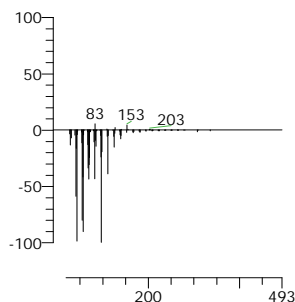

n-Tetracosanol-1  
Formula C<sub>24</sub>H<sub>50</sub>O, MW 354, CAS# 506-51-4, Entry# 23874  
Lignoceric alcohol

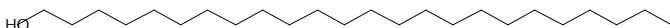

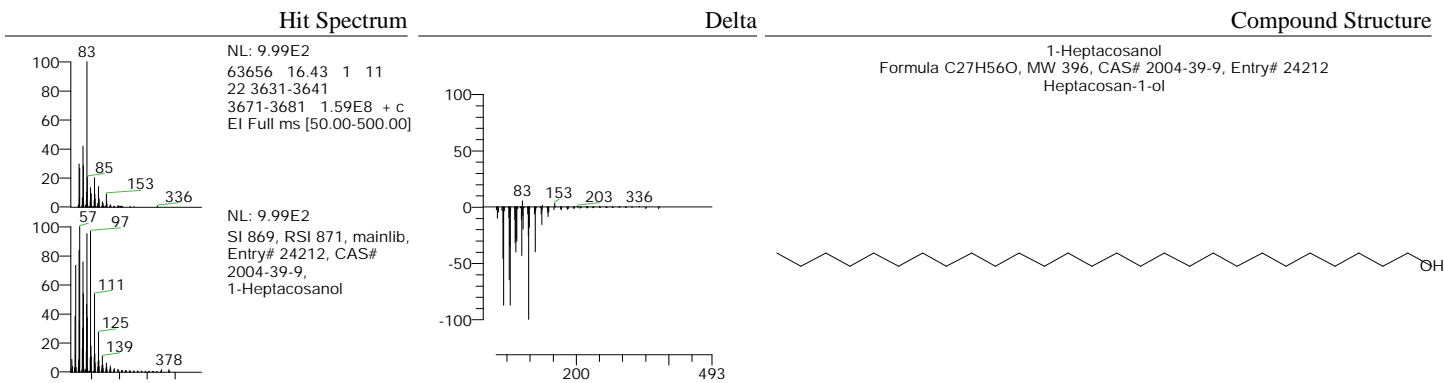

| RT    | Compound Name                   | Area       | Area % | RSI | Cas # | Library |
|-------|---------------------------------|------------|--------|-----|-------|---------|
| 16.43 | Nonadecyl pentafluoropropionate | 2299670507 | 1.22   | 875 | NA    | mainlib |
| 16.43 | Nonadecyl trifluoroacetate      | 2299670507 | 1.22   | 875 | NA    | mainlib |
| 16.43 | Nonadecyl heptafluorobutyrate   | 2299670507 | 1.22   | 873 | NA    | mainlib |

Analysed By:

Checked By:

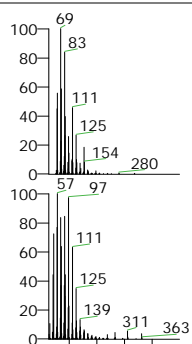

NL: 9.99E2  
63753 16.76 1 11  
22 3728-3738  
3768-3778 1.44E8 + c  
EI Full ms [50.00-500.00]

NL: 9.99E2  
SI 903, RSI 904, mainlib,  
Entry# 24208, CAS# NA,  
Nonadecyl  
trifluoroacetate

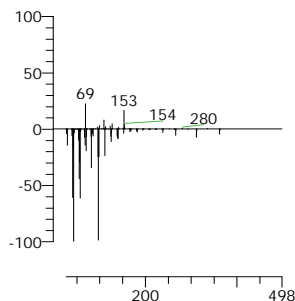

Nonadecyl trifluoroacetate  
Formula C<sub>21</sub>H<sub>39</sub>F<sub>3</sub>O<sub>2</sub>, MW 380, CAS# NA, Entry# 24208  
Nonadecyl 2,2,2-trifluoroacetate

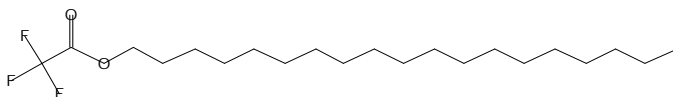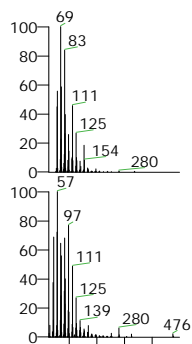

NL: 9.99E2  
63753 16.76 1 11  
22 3728-3738  
3768-3778 1.44E8 + c  
EI Full ms [50.00-500.00]

NL: 9.99E2  
SI 901, RSI 903, mainlib,  
Entry# 24197, CAS# NA,  
Eicosyl  
heptafluorobutyrate

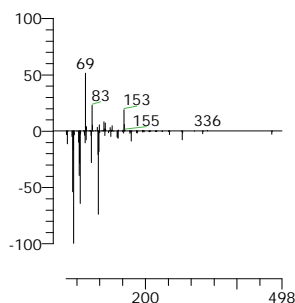

Eicosyl heptafluorobutyrate  
Formula C<sub>24</sub>H<sub>41</sub>F<sub>7</sub>O<sub>2</sub>, MW 494, CAS# NA, Entry# 24197  
Eicosyl 2,2,3,3,4,4,4-heptafluorobutanoate

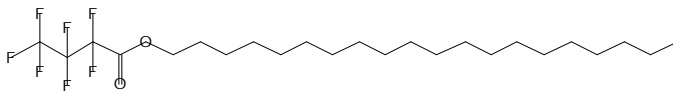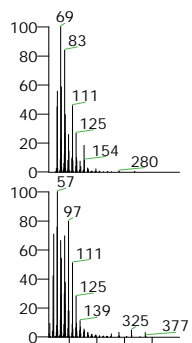

NL: 9.99E2  
63753 16.76 1 11  
22 3728-3738  
3768-3778 1.44E8 + c  
EI Full ms [50.00-500.00]

NL: 9.99E2  
SI 901, RSI 902, mainlib,  
Entry# 24190, CAS# NA,  
Eicosyl trifluoroacetate

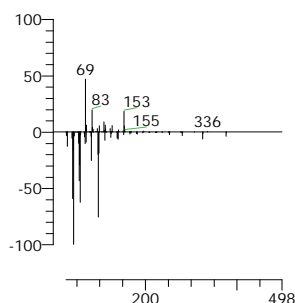

Eicosyl trifluoroacetate  
Formula C<sub>22</sub>H<sub>41</sub>F<sub>3</sub>O<sub>2</sub>, MW 394, CAS# NA, Entry# 24190  
Eicosyl 2,2,2-trifluoroacetate

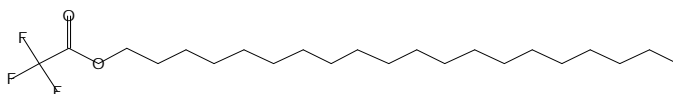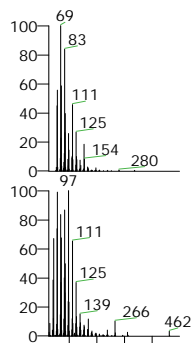

NL: 9.99E2  
63753 16.76 1 11  
22 3728-3738  
3768-3778 1.44E8 + c  
EI Full ms [50.00-500.00]

NL: 9.99E2  
SI 898, RSI 900, mainlib,  
Entry# 63582, CAS# NA,  
Nonadecyl  
heptafluorobutyrate

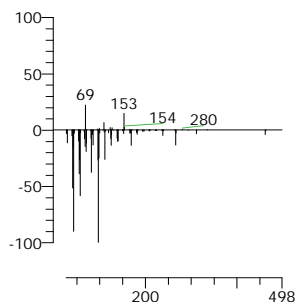

Nonadecyl heptafluorobutyrate  
Formula C<sub>23</sub>H<sub>39</sub>F<sub>7</sub>O<sub>2</sub>, MW 480, CAS# NA, Entry# 63582  
Nonadecyl 2,2,3,3,4,4,4-heptafluorobutanoate

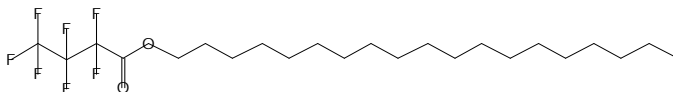



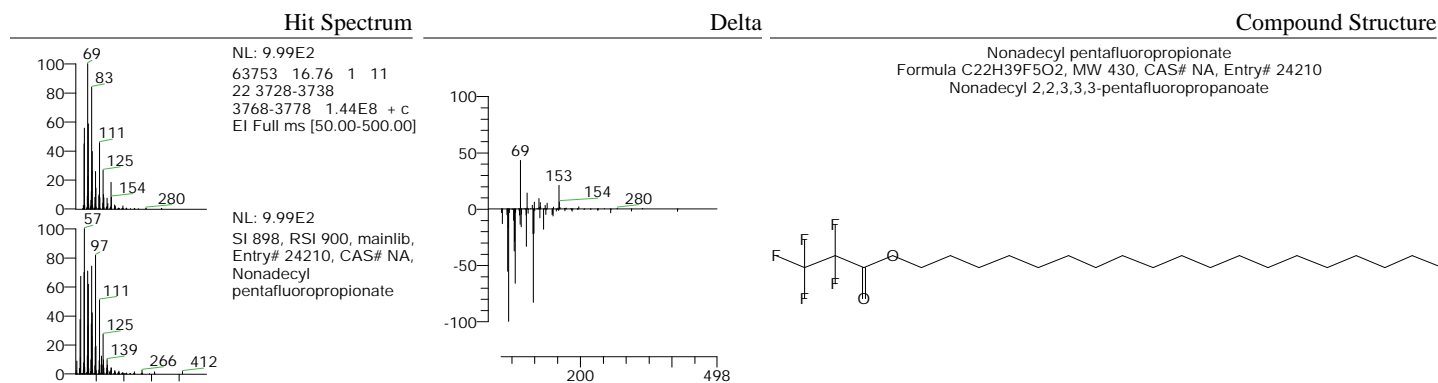

| RT    | Compound Name               | Area       | Area % | RSI | Cas # | Library |
|-------|-----------------------------|------------|--------|-----|-------|---------|
| 16.76 | Nonadecyl trifluoroacetate  | 3689810362 | 1.95   | 904 | NA    | mainlib |
| 16.76 | Eicosyl heptafluorobutyrate | 3689810362 | 1.95   | 903 | NA    | mainlib |
| 16.76 | Eicosyl trifluoroacetate    | 3689810362 | 1.95   | 902 | NA    | mainlib |

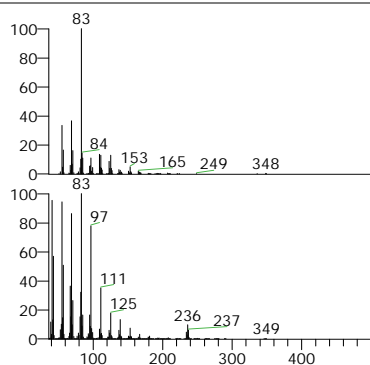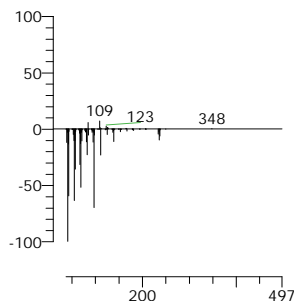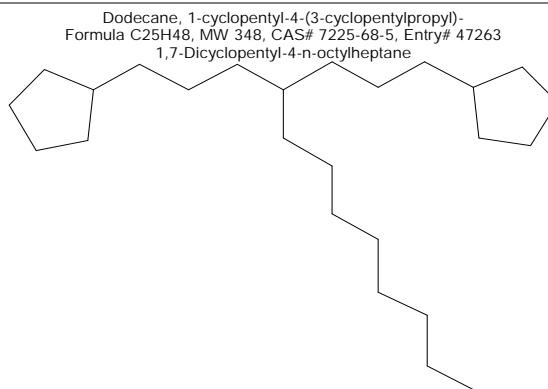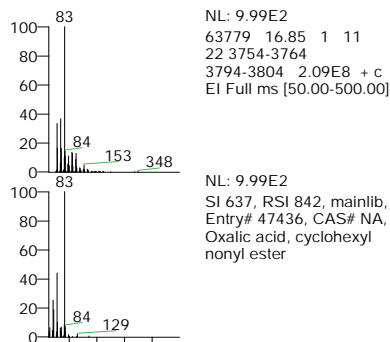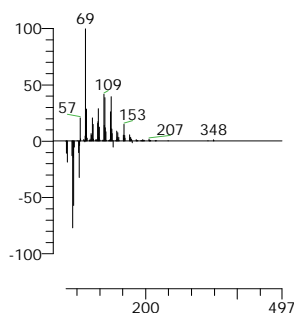

Oxalic acid, cyclohexyl nonyl ester  
Formula C<sub>17</sub>H<sub>30</sub>O<sub>4</sub>, MW 298, CAS# NA, Entry# 47436

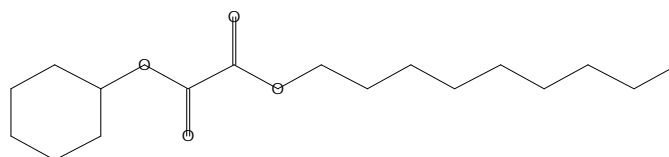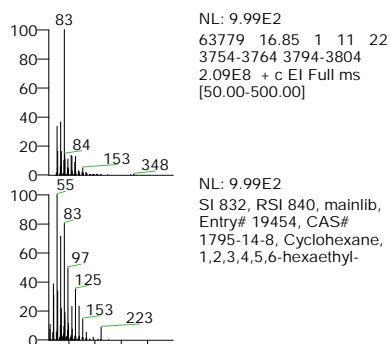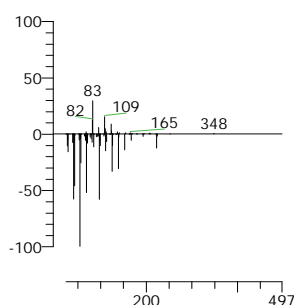

Cyclohexane, 1,2,3,4,5,6-hexaethyl-  
Formula C<sub>18</sub>H<sub>36</sub>, MW 252, CAS# 1795-14-8, Entry# 19454  
1,2,3,4,5,6-Hexaethylcyclohexane #

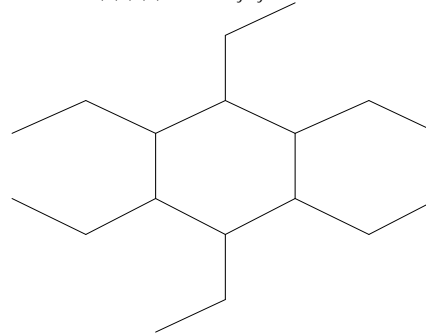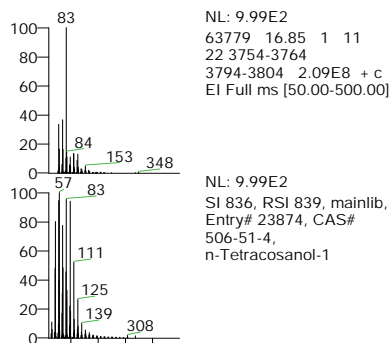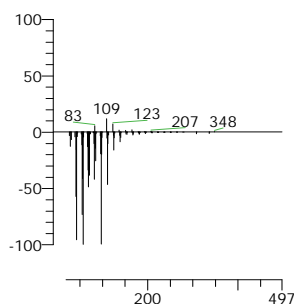

n-Tetracosanol-1  
Formula C<sub>24</sub>H<sub>50</sub>O, MW 354, CAS# 506-51-4, Entry# 23874  
Lignoceric alcohol

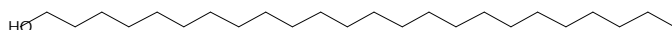

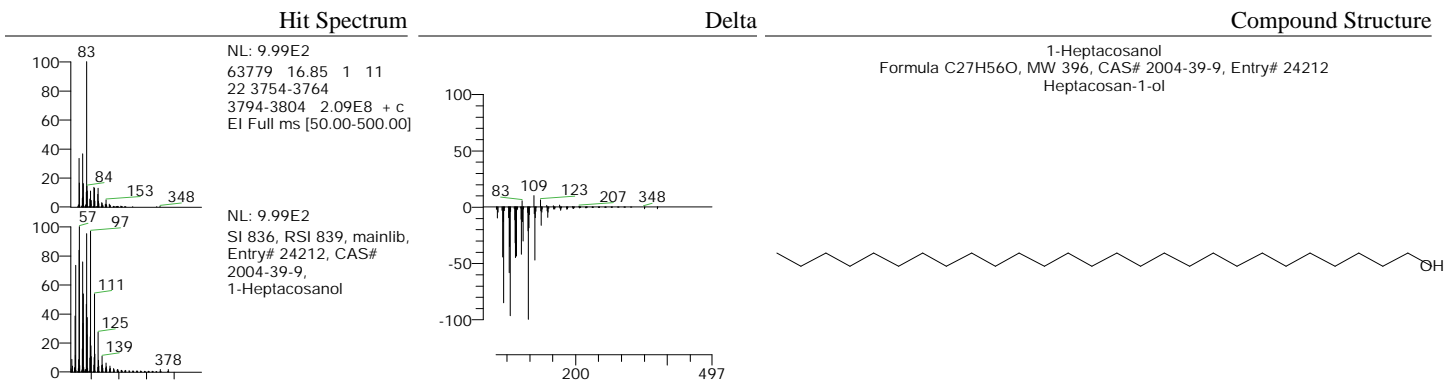

| RT    | Compound Name                                    | Area       | Area % | RSI | Cas #     | Library |
|-------|--------------------------------------------------|------------|--------|-----|-----------|---------|
| 16.85 | Dodecane, 1-cyclopentyl-4-(3-cyclopentylpropyl)- | 3263819249 | 1.73   | 846 | 7225-68-5 | mainlib |
| 16.85 | Oxalic acid, cyclohexyl nonyl ester              | 3263819249 | 1.73   | 842 | NA        | mainlib |
| 16.85 | Cyclohexane, 1,2,3,4,5,6-hexaethyl-              | 3263819249 | 1.73   | 840 | 1795-14-8 | mainlib |

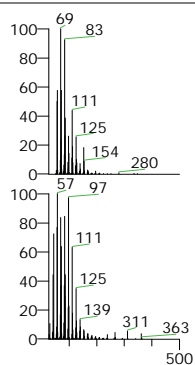

NL: 9.99E2  
63822 16.99 1 11  
22 3797-3807  
3837-3847 9.76E7 + c  
EI Full ms [50.00-500.00]

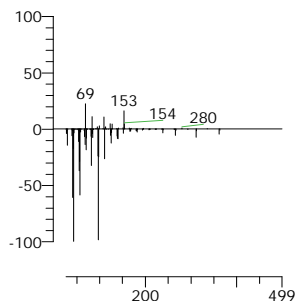

Nonadecyl trifluoroacetate  
Formula C<sub>21</sub>H<sub>39</sub>F<sub>3</sub>O<sub>2</sub>, MW 380, CAS# NA, Entry# 24208  
Nonadecyl 2,2,2-trifluoroacetate

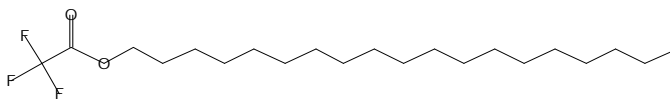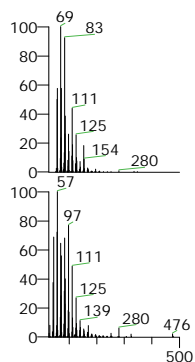

NL: 9.99E2  
63822 16.99 1 11  
22 3797-3807  
3837-3847 9.76E7 + c  
EI Full ms [50.00-500.00]

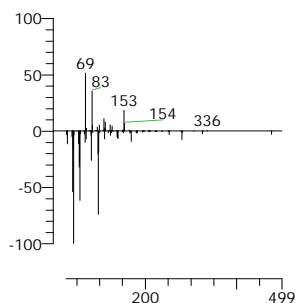

Eicosyl heptafluorobutyrate  
Formula C<sub>24</sub>H<sub>41</sub>F<sub>7</sub>O<sub>2</sub>, MW 494, CAS# NA, Entry# 24197  
Eicosyl 2,2,3,3,4,4,4-heptafluorobutanoate

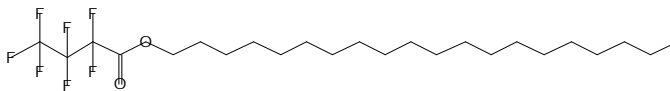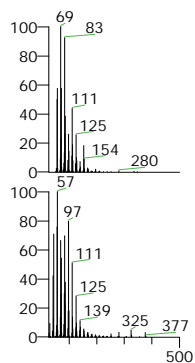

NL: 9.99E2  
63822 16.99 1 11  
22 3797-3807  
3837-3847 9.76E7 + c  
EI Full ms [50.00-500.00]

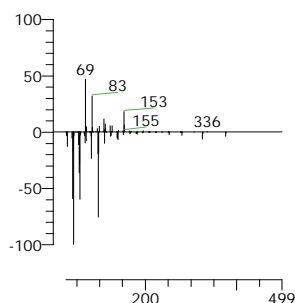

Eicosyl trifluoroacetate  
Formula C<sub>22</sub>H<sub>41</sub>F<sub>3</sub>O<sub>2</sub>, MW 394, CAS# NA, Entry# 24190  
Eicosyl 2,2,2-trifluoroacetate

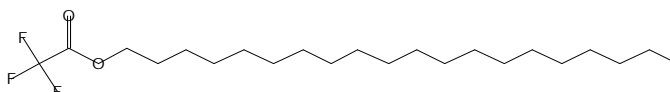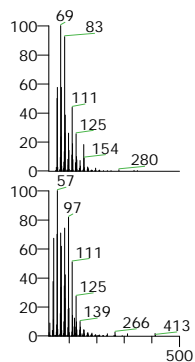

NL: 9.99E2  
63822 16.99 1 11  
22 3797-3807  
3837-3847 9.76E7 + c  
EI Full ms [50.00-500.00]

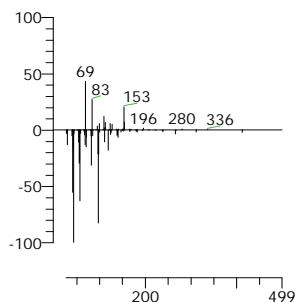

Nonadecyl pentafluoropropionate  
Formula C<sub>22</sub>H<sub>39</sub>F<sub>5</sub>O<sub>2</sub>, MW 430, CAS# NA, Entry# 24210  
Nonadecyl 2,2,3,3,3-pentafluoropropanoate

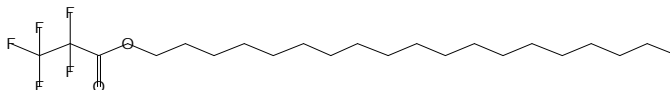

## Hit Spectrum

## Delta

## Compound Structure

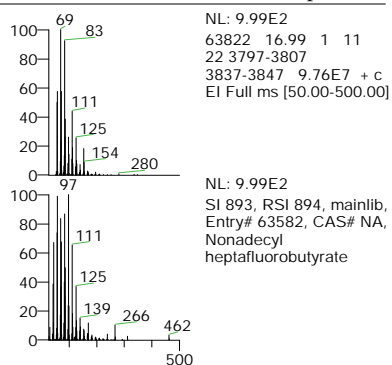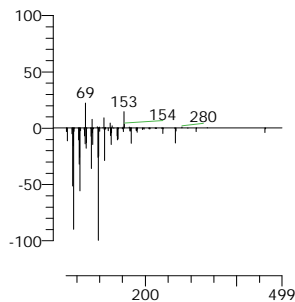

Nonadecyl heptafluorobutyrate  
Formula C<sub>23</sub>H<sub>39</sub>F<sub>7</sub>O<sub>2</sub>, MW 480, CAS# NA, Entry# 63582  
Nonadecyl 2,2,3,3,4,4,4-heptafluorobutanoate

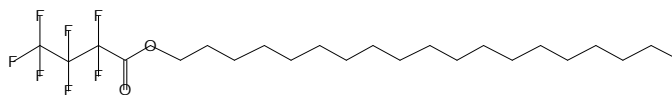

| RT    | Compound Name               | Area       | Area % | RSI | Cas # | Library |
|-------|-----------------------------|------------|--------|-----|-------|---------|
| 16.99 | Eicosyl heptafluorobutyrate | 2300550914 | 1.22   | 899 | NA    | mainlib |
| 16.99 | Nonadecyl trifluoroacetate  | 2300550914 | 1.22   | 899 | NA    | mainlib |
| 16.99 | Eicosyl trifluoroacetate    | 2300550914 | 1.22   | 898 | NA    | mainlib |

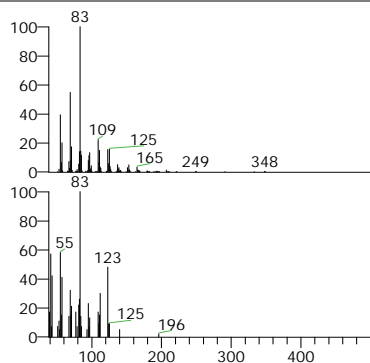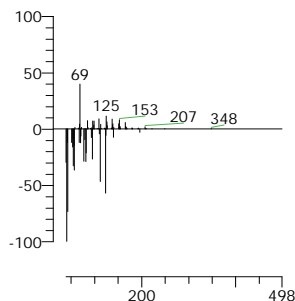

Cyclopropanol, 1-(3,7-dimethyl-1-octenyl)-  
Formula C<sub>13</sub>H<sub>24</sub>O, MW 196, CAS# 65147-72-0, Entry# 47465  
1-[(1E)-3,7-Dimethyl-1-octenyl]cyclopropanol #

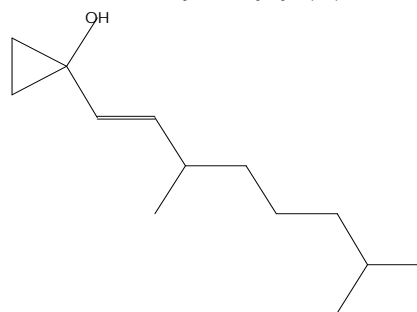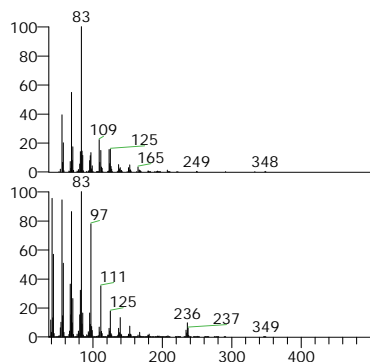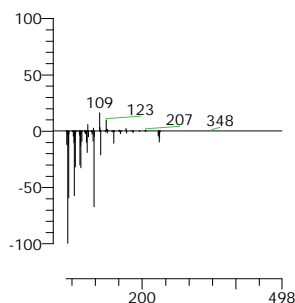

Dodecane, 1-cyclopentyl-4-(3-cyclopentylpropyl)-  
Formula C<sub>25</sub>H<sub>48</sub>, MW 348, CAS# 7225-68-5, Entry# 47263  
1,7-Dicyclopentyl-4-n-octylheptane

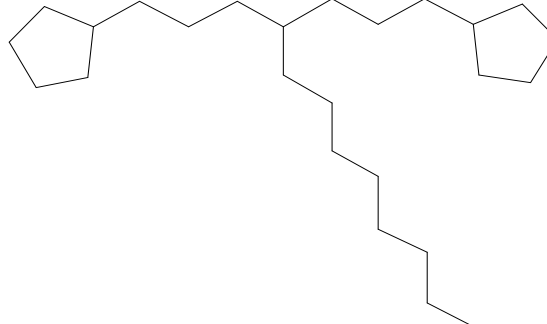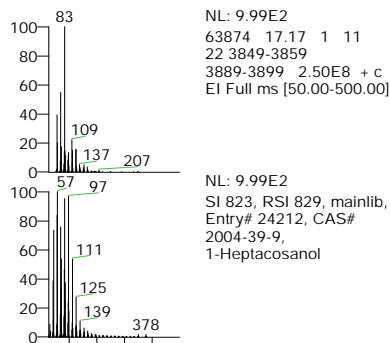

NL: 9.99E2  
63874 17.17 1 11  
22 3849-3859  
3889-3899 2.50E8 + c  
EI Full ms [50.00-500.00]

NL: 9.99E2  
SI 823, RSI 829, mainlib,  
Entry# 24212, CAS#  
2004-39-9,  
1-Heptacosanol

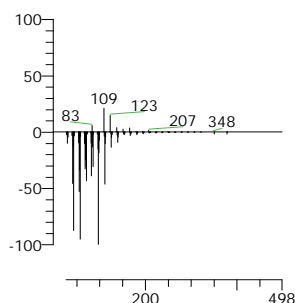

1-Heptacosanol  
Formula C<sub>27</sub>H<sub>56</sub>O, MW 396, CAS# 2004-39-9, Entry# 24212  
Heptacosan-1-ol

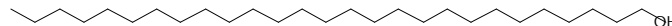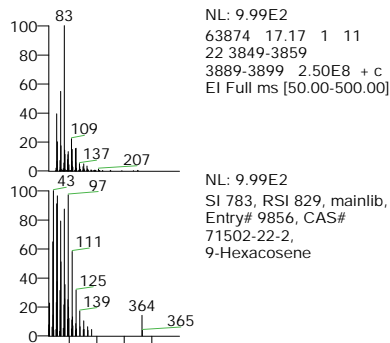

NL: 9.99E2  
63874 17.17 1 11  
22 3849-3859  
3889-3899 2.50E8 + c  
EI Full ms [50.00-500.00]

NL: 9.99E2  
SI 783, RSI 829, mainlib,  
Entry# 9856, CAS#  
71502-22-2,  
9-Hexacosene

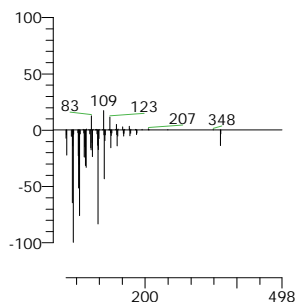

9-Hexacosene  
Formula C<sub>26</sub>H<sub>52</sub>, MW 364, CAS# 71502-22-2, Entry# 9856  
(9E)-9-Hexacosene #

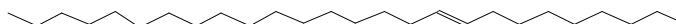

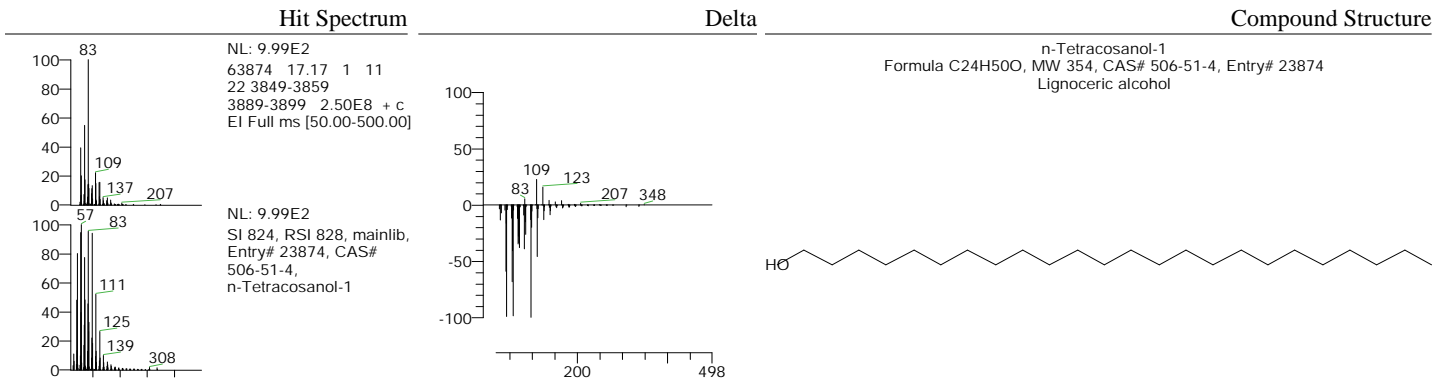

| RT    | Compound Name                                    | Area       | Area % | RSI | Cas #      | Library |
|-------|--------------------------------------------------|------------|--------|-----|------------|---------|
| 17.17 | Cyclopropanol, 1-(3,7-dimethyl-1-octenyl)-       | 4757920691 | 2.52   | 865 | 65147-72-0 | mainlib |
| 17.17 | Dodecane, 1-cyclopentyl-4-(3-cyclopentylpropyl)- | 4757920691 | 2.52   | 848 | 7225-68-5  | mainlib |
| 17.17 | 1-Heptacosanol                                   | 4757920691 | 2.52   | 829 | 2004-39-9  | mainlib |

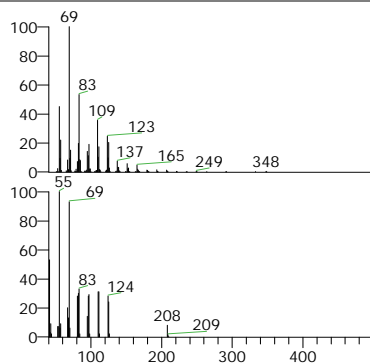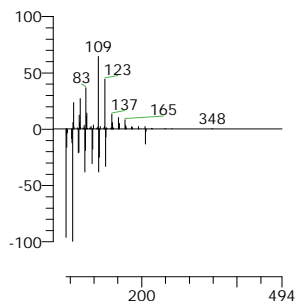

1-Cyclohexyl-1-(4-methylcyclohexyl)ethane  
Formula C<sub>15</sub>H<sub>28</sub>, MW 208, CAS# 2027-12-5, Entry# 18790

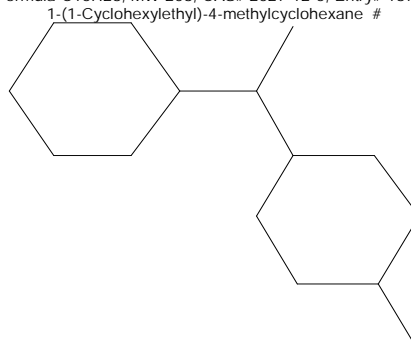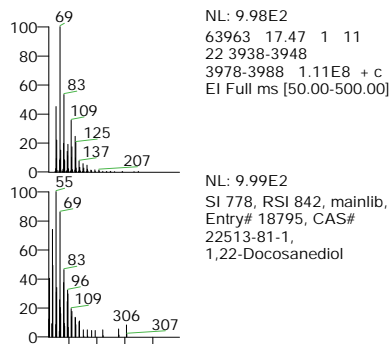

NL: 9.98E2  
63963 17.47 1 11  
22 3938-3948 3978-3988  
1.11E8 + c  
EI Full ms [50.00-500.00]

NL: 9.99E2  
SI 778, RSI 842, mainlib,  
Entry# 18795, CAS#  
22513-81-1,  
1,22-Docosanediol

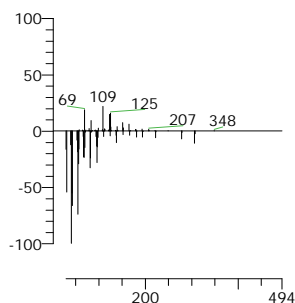

1,22-Docosanediol  
Formula C<sub>22</sub>H<sub>46</sub>O<sub>2</sub>, MW 342, CAS# 22513-81-1, Entry# 18795

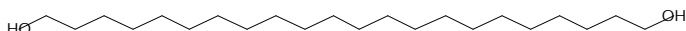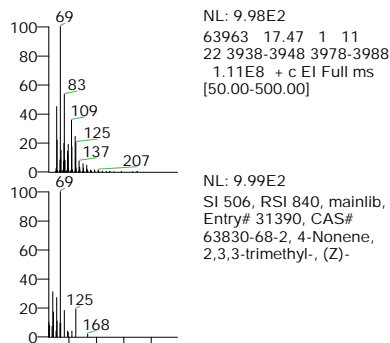

NL: 9.98E2  
63963 17.47 1 11  
22 3938-3948 3978-3988  
1.11E8 + c EI Full ms  
[50.00-500.00]

NL: 9.99E2  
SI 506, RSI 840, mainlib,  
Entry# 31390, CAS#  
63830-68-2, 4-Nonene,  
2,3,3-trimethyl-, (Z)-

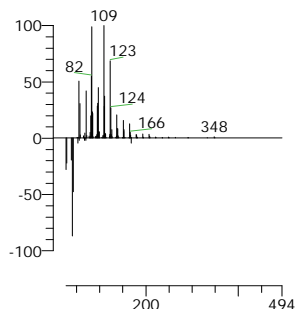

4-Nonene, 2,3,3-trimethyl-, (Z)-  
Formula C<sub>12</sub>H<sub>24</sub>, MW 168, CAS# 63830-68-2, Entry# 31390  
(4Z)-2,3,3-Trimethyl-4-nonene #

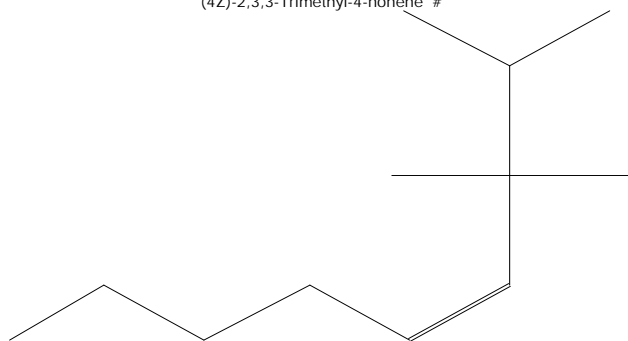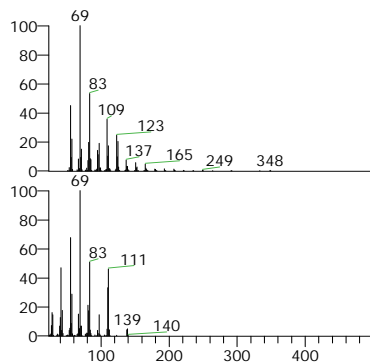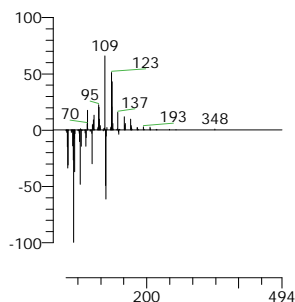

Cyclohexane, 1,1'-(1,2-dimethyl-1,2-ethanediyl)bis-  
Formula C<sub>16</sub>H<sub>30</sub>, MW 222, CAS# 74663-71-1, Entry# 32114  
Butane, 2,3-dicyclohexyl-

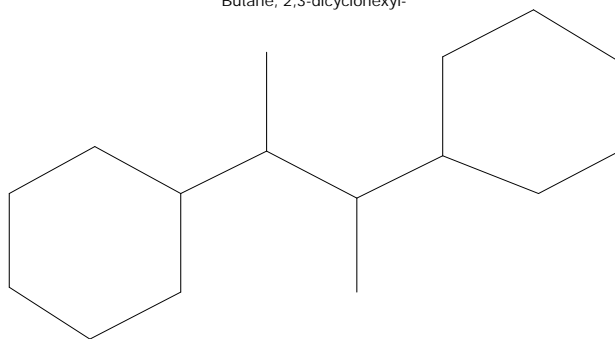



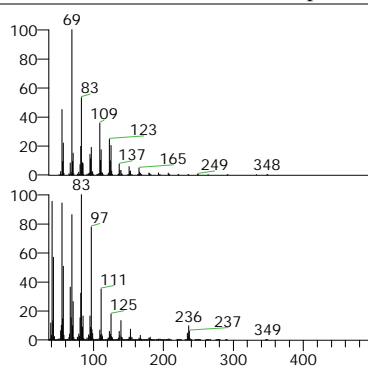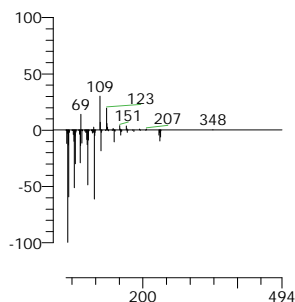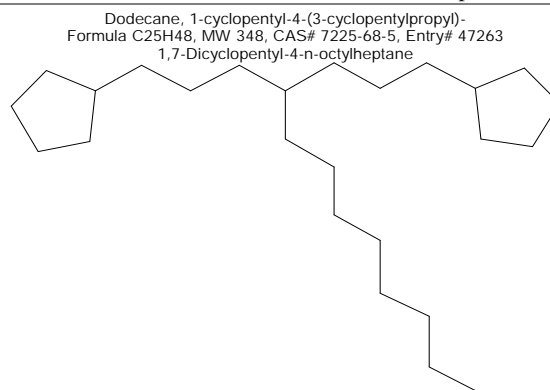

| RT    | Compound Name                             | Area       | Area % | RSI | Cas #      | Library |
|-------|-------------------------------------------|------------|--------|-----|------------|---------|
| 17.47 | 1-Cyclohexyl-1-(4-methylcyclohexyl)ethane | 2973370558 | 1.57   | 895 | 2027-12-5  | mainlib |
| 17.47 | 1,22-Docosanediol                         | 2973370558 | 1.57   | 842 | 22513-81-1 | mainlib |
| 17.47 | 4-Nonene, 2,3,3-trimethyl-, (Z)-          | 2973370558 | 1.57   | 840 | 63830-68-2 | mainlib |

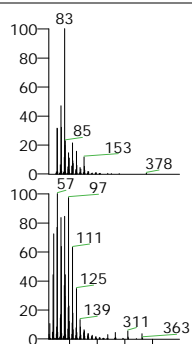

NL: 9.99E2  
64227 18.38 1 11  
22 4202-4212  
4242-4252 1.25E8 + c  
EI Full ms [50.00-500.00]

NL: 9.99E2  
SI 878, RSI 879, mainlib,  
Entry# 24208, CAS# NA,  
Nonadecyl  
trifluoroacetate

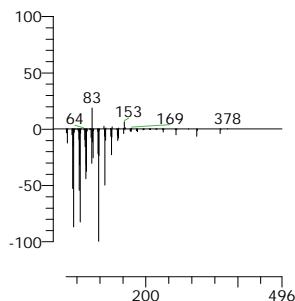

Nonadecyl trifluoroacetate  
Formula C<sub>21</sub>H<sub>39</sub>F<sub>3</sub>O<sub>2</sub>, MW 380, CAS# NA, Entry# 24208  
Nonadecyl 2,2,2-trifluoroacetate

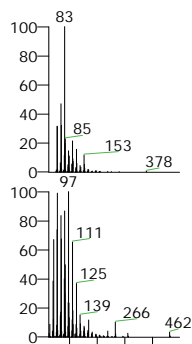

NL: 9.99E2  
64227 18.38 1 11  
22 4202-4212  
4242-4252 1.25E8 + c  
EI Full ms [50.00-500.00]

NL: 9.99E2  
SI 877, RSI 879, mainlib,  
Entry# 63582, CAS# NA,  
Nonadecyl  
heptafluorobutyrate

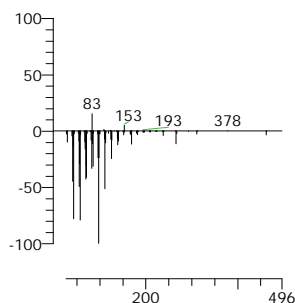

Nonadecyl heptafluorobutyrate  
Formula C<sub>23</sub>H<sub>39</sub>F<sub>7</sub>O<sub>2</sub>, MW 480, CAS# NA, Entry# 63582  
Nonadecyl 2,2,3,3,4,4,4-heptafluorobutanoate

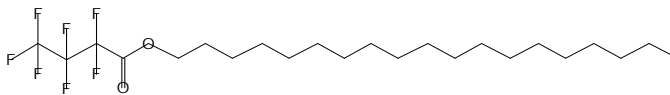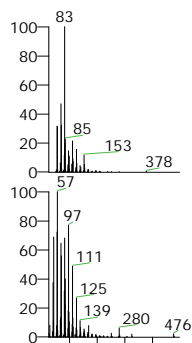

NL: 9.99E2  
64227 18.38 1 11  
22 4202-4212  
4242-4252 1.25E8 + c  
EI Full ms [50.00-500.00]

NL: 9.99E2  
SI 876, RSI 878, mainlib,  
Entry# 24197, CAS# NA,  
Eicosyl  
heptafluorobutyrate

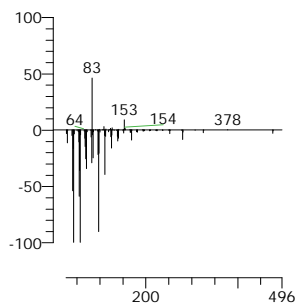

Eicosyl heptafluorobutyrate  
Formula C<sub>24</sub>H<sub>41</sub>F<sub>7</sub>O<sub>2</sub>, MW 494, CAS# NA, Entry# 24197  
Eicosyl 2,2,3,3,4,4,4-heptafluorobutanoate

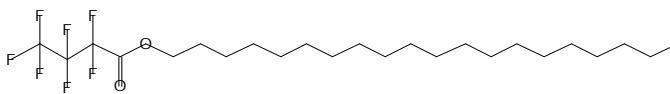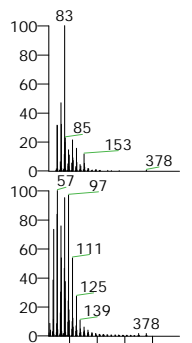

NL: 9.99E2  
64227 18.38 1 11  
22 4202-4212  
4242-4252 1.25E8 + c  
EI Full ms [50.00-500.00]

NL: 9.99E2  
SI 875, RSI 876, mainlib,  
Entry# 24212, CAS#  
2004-39-9,  
1-Heptacosanol

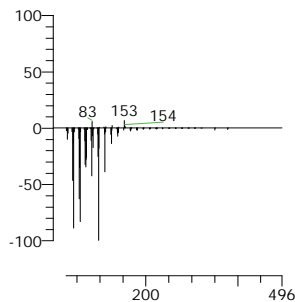

1-Heptacosanol  
Formula C<sub>27</sub>H<sub>56</sub>O, MW 396, CAS# 2004-39-9, Entry# 24212  
Heptacosan-1-ol

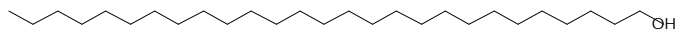

## Hit Spectrum

## Delta

## Compound Structure

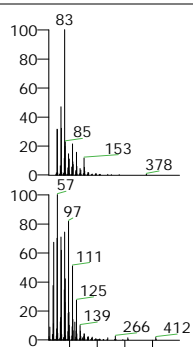

NL: 9.99E2  
 64227 18.38 1 11  
 22 4202-4212  
 4242-4252 1.25E8 + c  
 EI Full ms [50.00-500.00]

NL: 9.99E2  
 SI 874, RSI 876, mainlib,  
 Entry# 24210, CAS# NA,  
 Nonadecyl  
 pentafluoropropionate

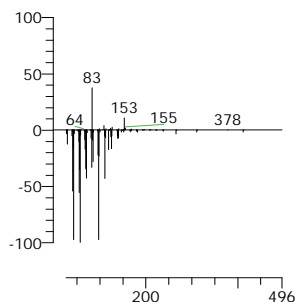

Nonadecyl pentafluoropropionate  
 Formula C<sub>22</sub>H<sub>39</sub>F<sub>5</sub>O<sub>2</sub>, MW 430, CAS# NA, Entry# 24210  
 Nonadecyl 2,2,3,3,3-pentafluoropropanoate

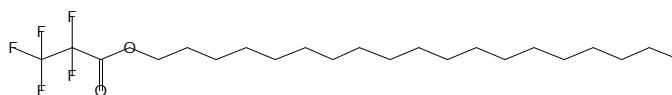

| RT    | Compound Name                 | Area       | Area % | RSI | Cas # | Library |
|-------|-------------------------------|------------|--------|-----|-------|---------|
| 18.38 | Nonadecyl heptafluorobutyrate | 1680109151 | 0.89   | 879 | NA    | mainlib |
| 18.38 | Nonadecyl trifluoroacetate    | 1680109151 | 0.89   | 879 | NA    | mainlib |
| 18.38 | Eicosyl heptafluorobutyrate   | 1680109151 | 0.89   | 878 | NA    | mainlib |

## Hit Spectrum

## Delta

## Compound Structure

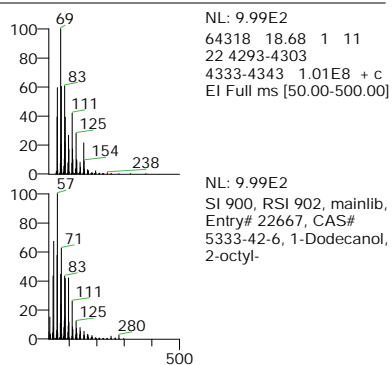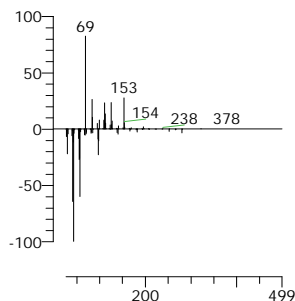

1-Dodecanol, 2-octyl-  
Formula C20H42O, MW 298, CAS# 5333-42-6, Entry# 22667  
Eutanol G

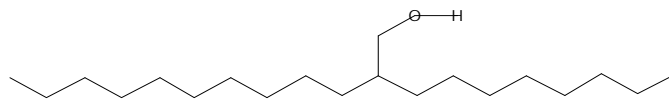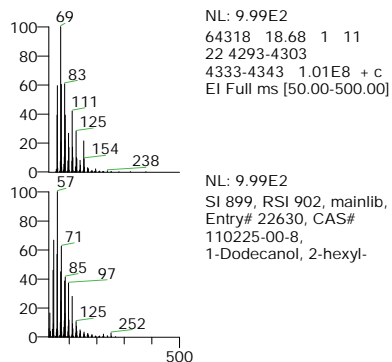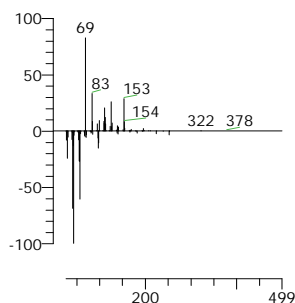

1-Dodecanol, 2-hexyl-  
Formula C18H38O, MW 270, CAS# 110225-00-8, Entry# 22630  
2-Hexyldodecan-1-ol

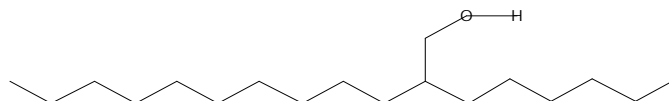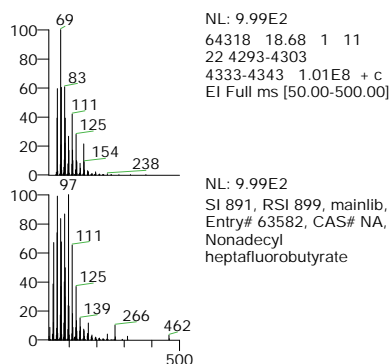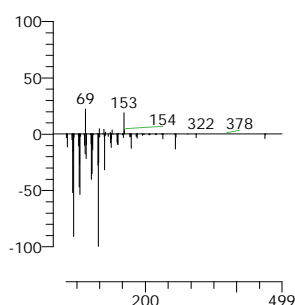

Nonadecyl heptafluorobutyrate  
Formula C23H39F7O2, MW 480, CAS# NA, Entry# 63582  
Nonadecyl 2,2,3,3,4,4,4-heptafluorobutanoate

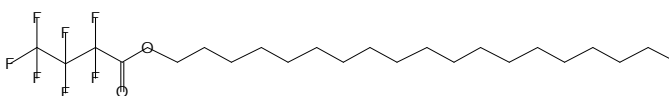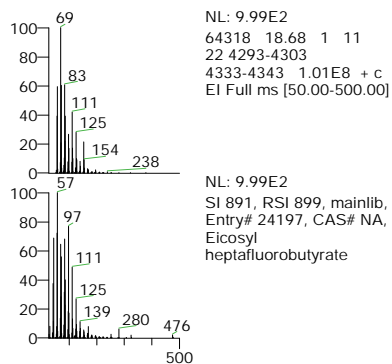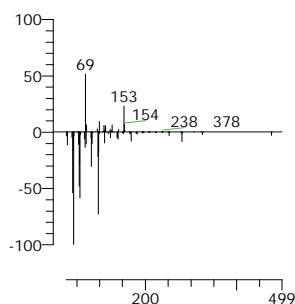

Eicosyl heptafluorobutyrate  
Formula C24H41F7O2, MW 494, CAS# NA, Entry# 24197  
Eicosyl 2,2,3,3,4,4,4-heptafluorobutanoate

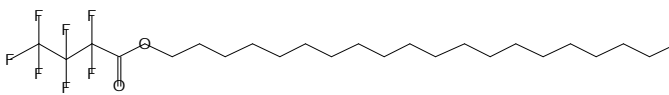

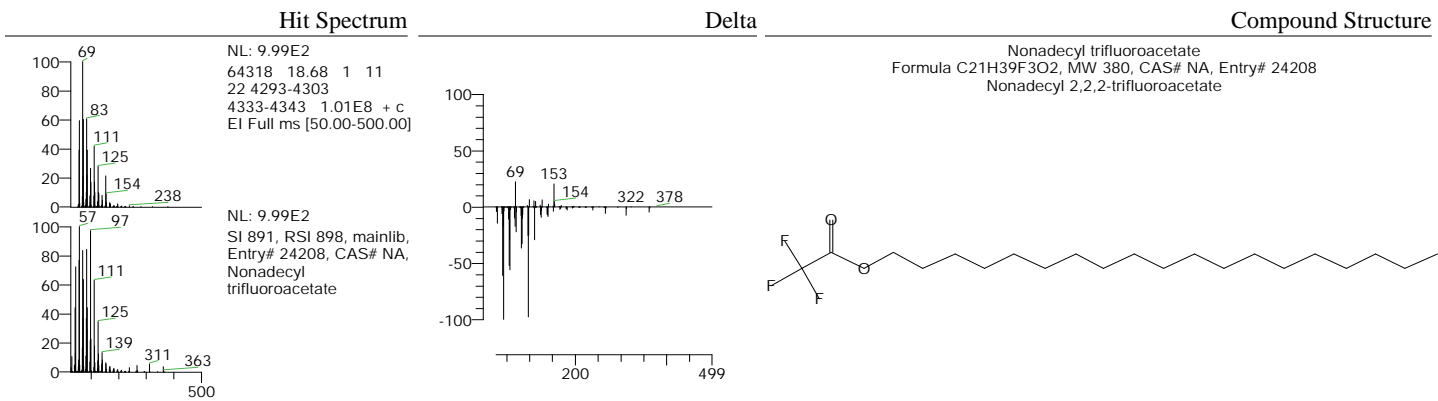

| RT    | Compound Name                 | Area       | Area % | RSI | Cas #       | Library |
|-------|-------------------------------|------------|--------|-----|-------------|---------|
| 18.68 | 1-Dodecanol, 2-hexyl-         | 3104011398 | 1.64   | 902 | 110225-00-8 | mainlib |
| 18.68 | 1-Dodecanol, 2-octyl-         | 3104011398 | 1.64   | 902 | 5333-42-6   | mainlib |
| 18.68 | Nonadecyl heptafluorobutyrate | 3104011398 | 1.64   | 899 | NA          | mainlib |

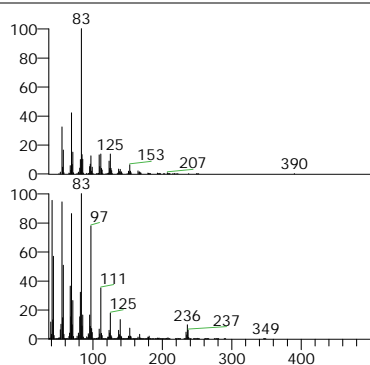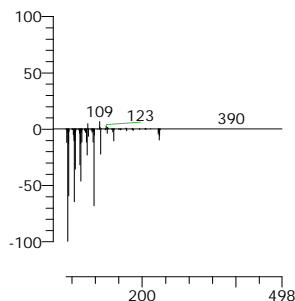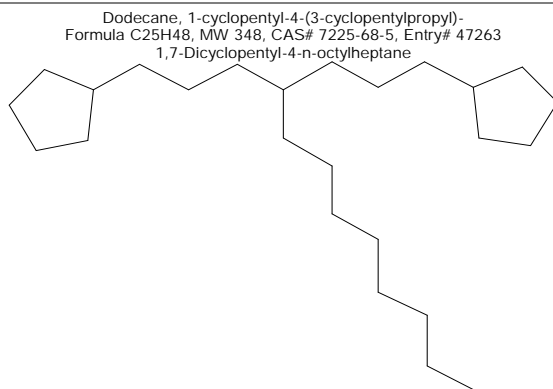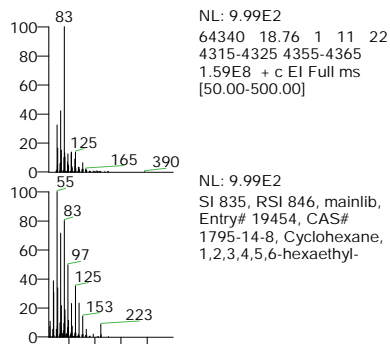

NL: 9.99E2  
64340 18.76 1 11 22  
4315-4325 4355-4365  
1.59E8 + c EI Full ms  
[50.00-500.00]

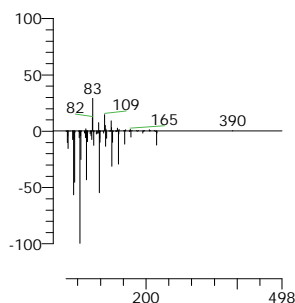

Cyclohexane, 1,2,3,4,5,6-hexaethyl-  
Formula C<sub>18</sub>H<sub>36</sub>, MW 252, CAS# 1795-14-8, Entry# 19454  
1,2,3,4,5,6-Hexaethylcyclohexane #

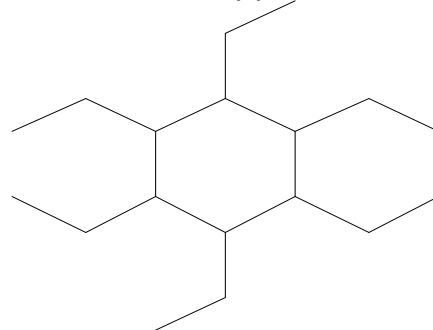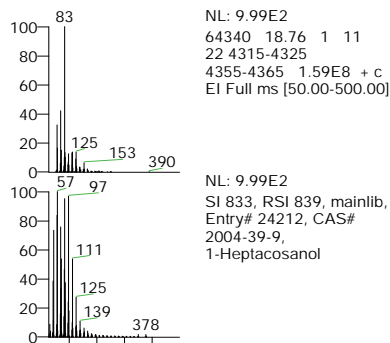

NL: 9.99E2  
64340 18.76 1 11  
22 4315-4325  
4355-4365 1.59E8 + c  
EI Full ms [50.00-500.00]

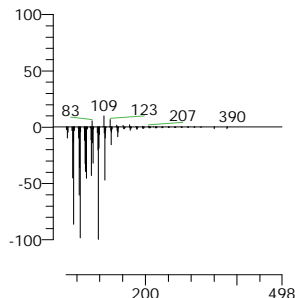

1-Heptacosanol  
Formula C<sub>27</sub>H<sub>56</sub>O, MW 396, CAS# 2004-39-9, Entry# 24212  
Heptacosan-1-ol

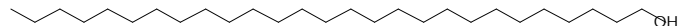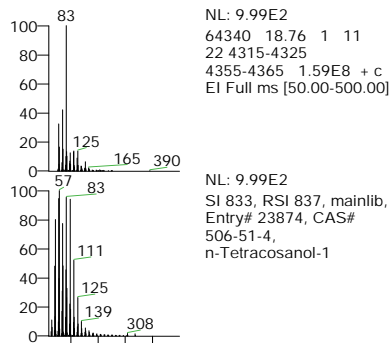

NL: 9.99E2  
64340 18.76 1 11  
22 4315-4325  
4355-4365 1.59E8 + c  
EI Full ms [50.00-500.00]

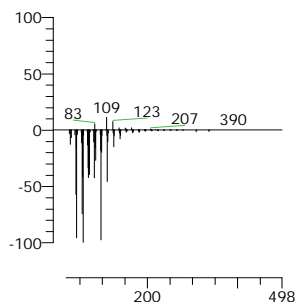

n-Tetracosanol-1  
Formula C<sub>24</sub>H<sub>50</sub>O, MW 354, CAS# 506-51-4, Entry# 23874  
Lignoceric alcohol

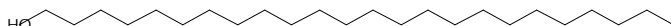

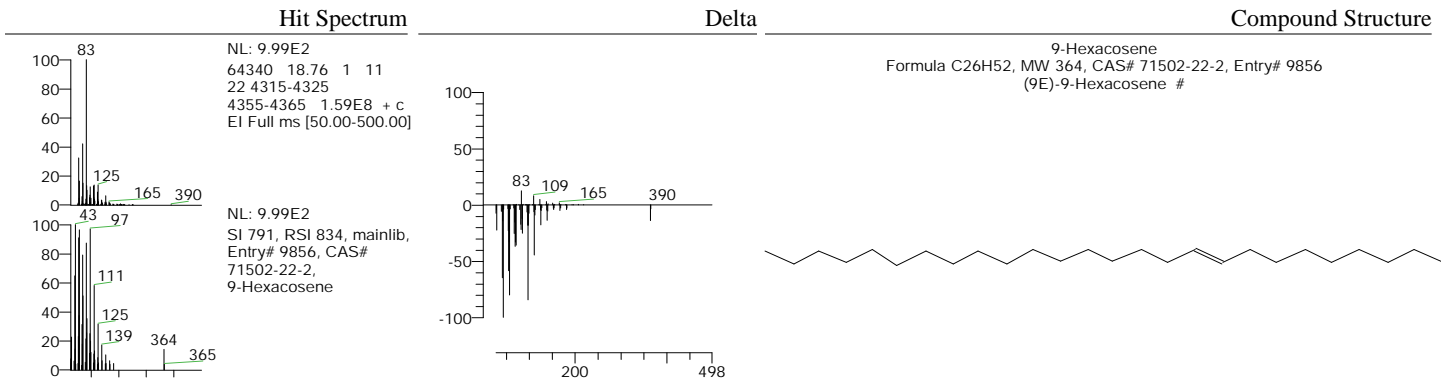

| RT    | Compound Name                                    | Area       | Area % | RSI | Cas #     | Library |
|-------|--------------------------------------------------|------------|--------|-----|-----------|---------|
| 18.76 | Dodecane, 1-cyclopentyl-4-(3-cyclopentylpropyl)- | 2041471843 | 1.08   | 850 | 7225-68-5 | mainlib |
| 18.76 | Cyclohexane, 1,2,3,4,5,6-hexaethyl-              | 2041471843 | 1.08   | 846 | 1795-14-8 | mainlib |
| 18.76 | 1-Heptacosanol                                   | 2041471843 | 1.08   | 839 | 2004-39-9 | mainlib |

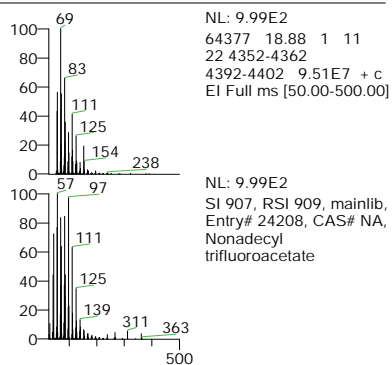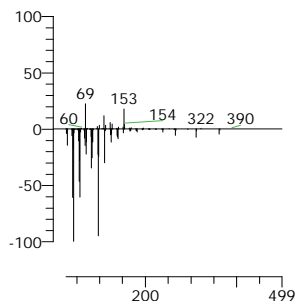

Nonadecyl trifluoroacetate  
Formula C<sub>21</sub>H<sub>39</sub>F<sub>3</sub>O<sub>2</sub>, MW 380, CAS# NA, Entry# 24208  
Nonadecyl 2,2,2-trifluoroacetate

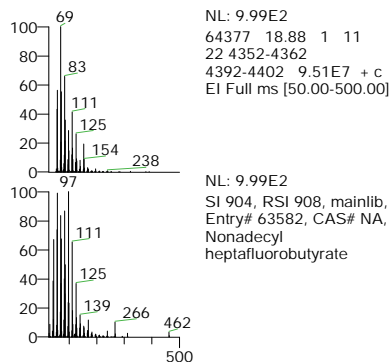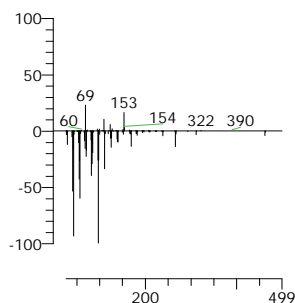

Nonadecyl heptafluorobutyrate  
Formula C<sub>23</sub>H<sub>39</sub>F<sub>7</sub>O<sub>2</sub>, MW 480, CAS# NA, Entry# 63582  
Nonadecyl 2,2,3,3,4,4,4-heptafluorobutanoate

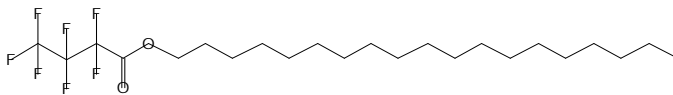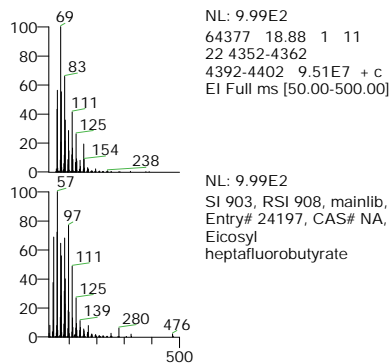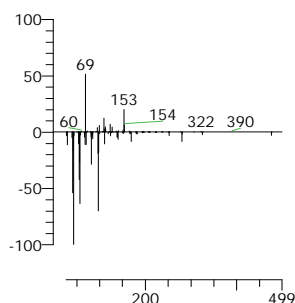

Eicosyl heptafluorobutyrate  
Formula C<sub>24</sub>H<sub>41</sub>F<sub>7</sub>O<sub>2</sub>, MW 494, CAS# NA, Entry# 24197  
Eicosyl 2,2,3,3,4,4,4-heptafluorobutanoate

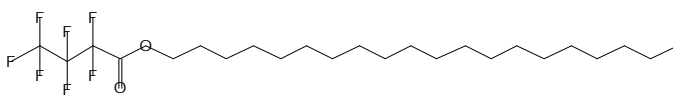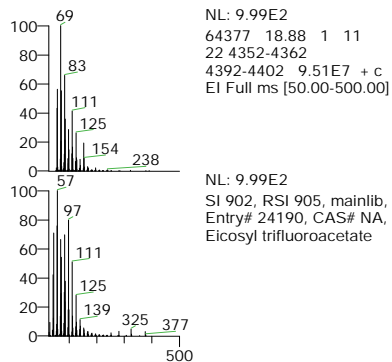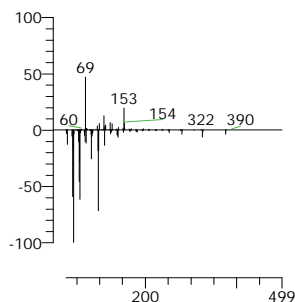

Eicosyl trifluoroacetate  
Formula C<sub>22</sub>H<sub>41</sub>F<sub>3</sub>O<sub>2</sub>, MW 394, CAS# NA, Entry# 24190  
Eicosyl 2,2,2-trifluoroacetate

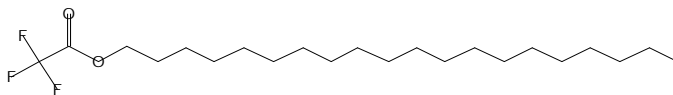



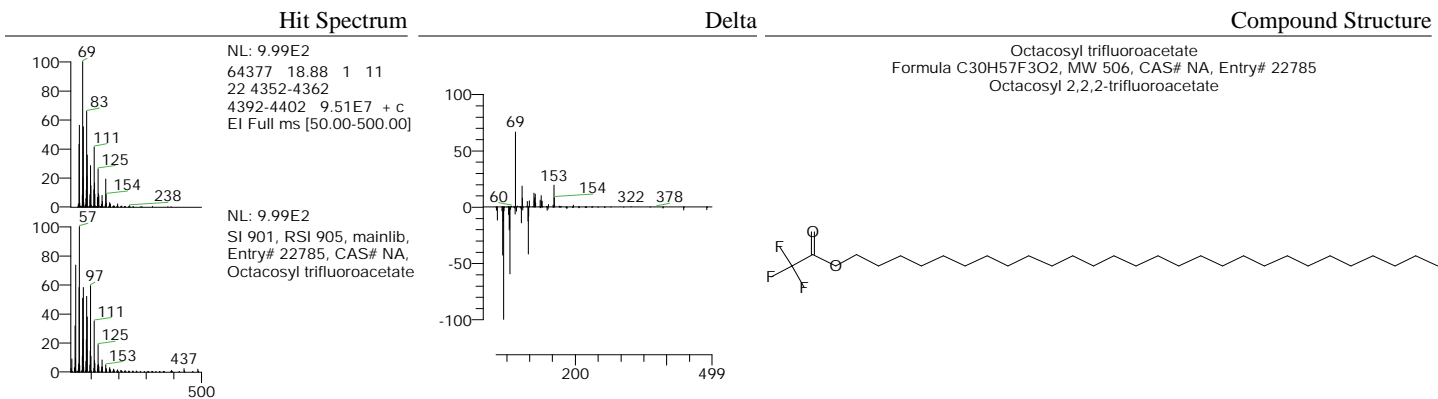

| RT    | Compound Name                 | Area       | Area % | RSI | Cas # | Library |
|-------|-------------------------------|------------|--------|-----|-------|---------|
| 18.88 | Nonadecyl trifluoroacetate    | 2177413406 | 1.15   | 909 | NA    | mainlib |
| 18.88 | Eicosyl heptafluorobutyrate   | 2177413406 | 1.15   | 908 | NA    | mainlib |
| 18.88 | Nonadecyl heptafluorobutyrate | 2177413406 | 1.15   | 908 | NA    | mainlib |

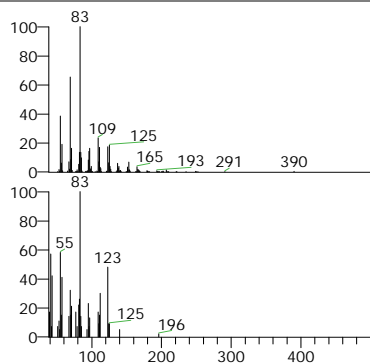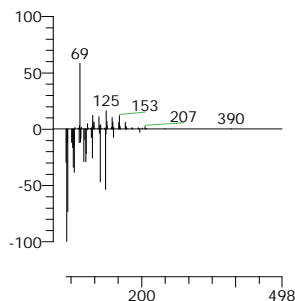

Cyclopropanol, 1-(3,7-dimethyl-1-octenyl)-  
Formula C<sub>13</sub>H<sub>24</sub>O, MW 196, CAS# 65147-72-0, Entry# 47465  
1-[(1E)-3,7-Dimethyl-1-octenyl]cyclopropanol #

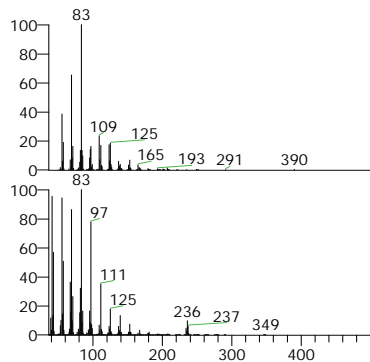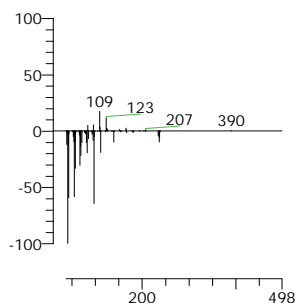

Dodecane, 1-cyclopentyl-4-(3-cyclopentylpropyl)-  
Formula C<sub>25</sub>H<sub>48</sub>, MW 348, CAS# 7225-68-5, Entry# 47263  
1,7-Dicyclopentyl-4-n-octylheptane

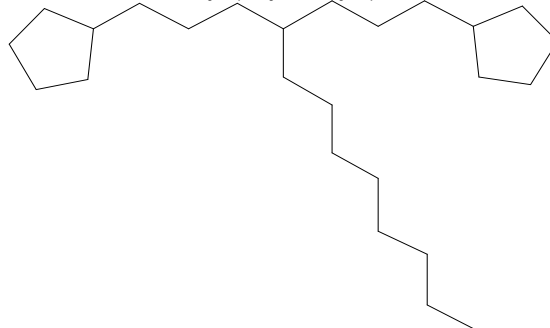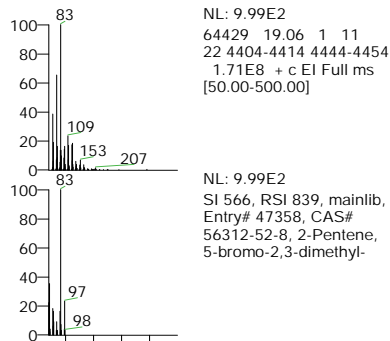

NL: 9.99E2  
64429 19.06 1 11  
22 4404-4414 4444-4454  
1.71E8 + c EI Full ms  
[50.00-500.00]  
NL: 9.99E2  
SI 566, RSI 839, mainlib,  
Entry# 47358, CAS#  
56312-52-8, 2-Pentene,  
5-bromo-2,3-dimethyl-

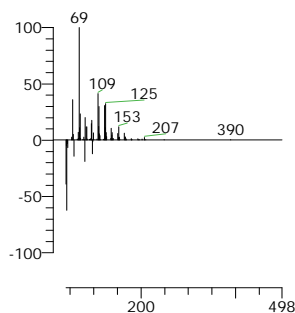

2-Pentene, 5-bromo-2,3-dimethyl-  
Formula C<sub>7</sub>H<sub>13</sub>Br, MW 176, CAS# 56312-52-8, Entry# 47358  
5-Bromo-2,3-dimethyl-2-pentene #

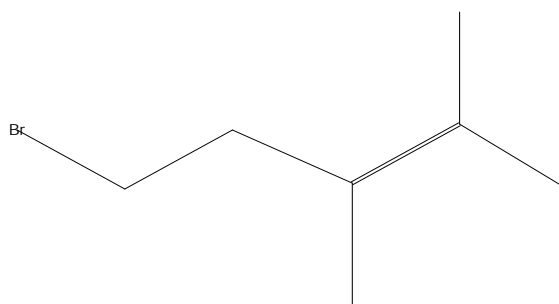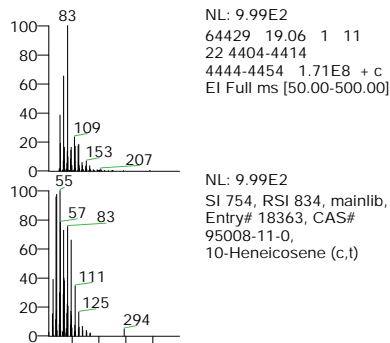

NL: 9.99E2  
64429 19.06 1 11  
22 4404-4414  
4444-4454 1.71E8 + c  
EI Full ms [50.00-500.00]  
NL: 9.99E2  
SI 754, RSI 834, mainlib,  
Entry# 18363, CAS#  
95008-11-0,  
10-Heneicosene (c,t)

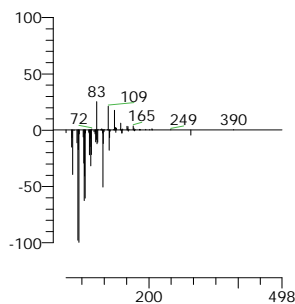

10-Heneicosene (c,t)  
Formula C<sub>21</sub>H<sub>42</sub>, MW 294, CAS# 95008-11-0, Entry# 18363  
(10E)-10-Henicosenes #

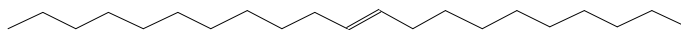

## Hit Spectrum

## Delta

## Compound Structure

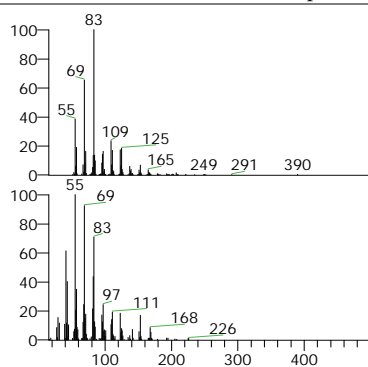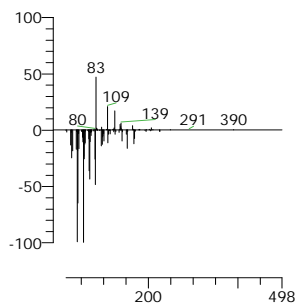

11-Dodecen-1-ol, 2,4,6-trimethyl-, (R,R,R)-  
 Formula C<sub>15</sub>H<sub>30</sub>O, MW 226, CAS# 27829-54-5, Entry# 18947  
 2,4,6-Trimethyl-11-dodecen-1-ol #

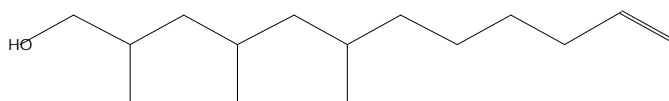

| RT    | Compound Name                                    | Area       | Area % | RSI | Cas #      | Library |
|-------|--------------------------------------------------|------------|--------|-----|------------|---------|
| 19.06 | Cyclopropanol, 1-(3,7-dimethyl-1-octenyl)-       | 3187026369 | 1.69   | 856 | 65147-72-0 | mainlib |
| 19.06 | Dodecane, 1-cyclopentyl-4-(3-cyclopentylpropyl)- | 3187026369 | 1.69   | 850 | 7225-68-5  | mainlib |
| 19.06 | 2-Pentene, 5-bromo-2,3-dimethyl-                 | 3187026369 | 1.69   | 839 | 56312-52-8 | mainlib |

Analysed By:

Checked By:

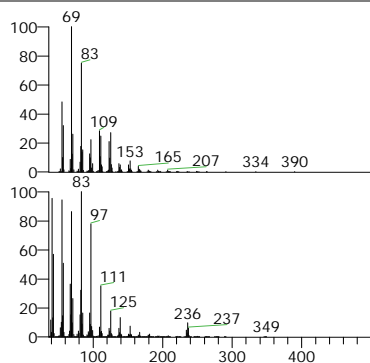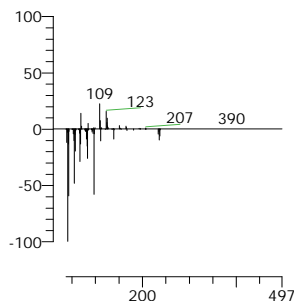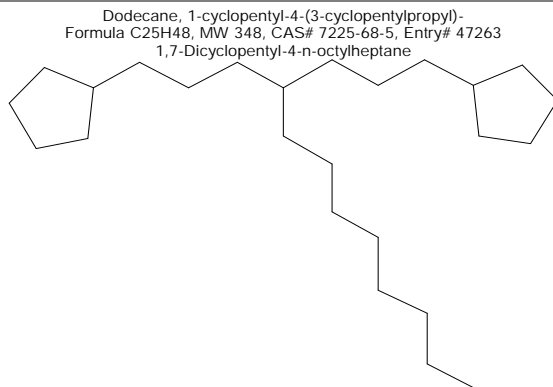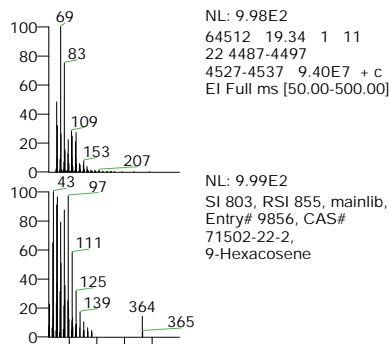

NL: 9.98E2  
64512 19.34 1 11  
22.4487-4497  
4527-4537 9.40E7 + c  
EI Full ms [50.00-500.00]

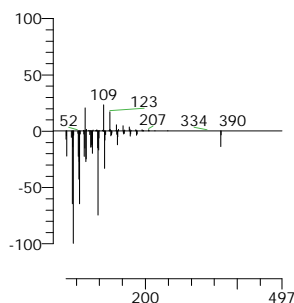

9-Hexacosene  
Formula C<sub>26</sub>H<sub>52</sub>, MW 364, CAS# 71502-22-2, Entry# 9856  
(9E)-9-Hexacosene #

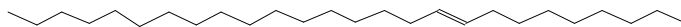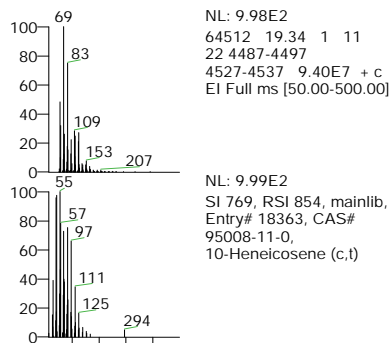

NL: 9.98E2  
64512 19.34 1 11  
22.4487-4497  
4527-4537 9.40E7 + c  
EI Full ms [50.00-500.00]

NL: 9.99E2  
SI 769, RSI 854, mainlib,  
Entry# 18363, CAS#  
95008-11-0,  
10-Heneicosene (c,t)

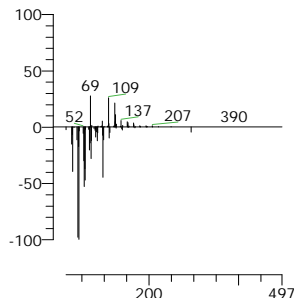

10-Heneicosene (c,t)  
Formula C<sub>21</sub>H<sub>42</sub>, MW 294, CAS# 95008-11-0, Entry# 18363  
(10E)-10-Henicosene #

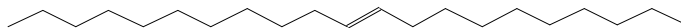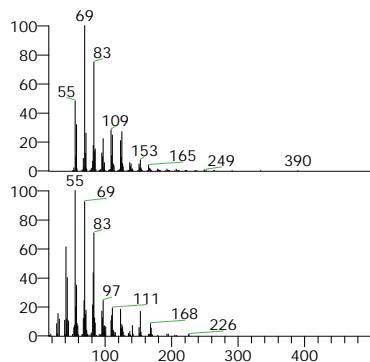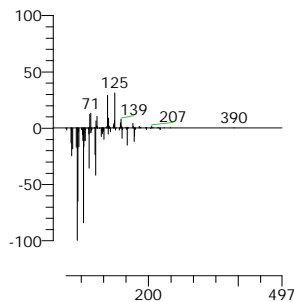

11-Dodecen-1-ol, 2,4,6-trimethyl-, (R,R,R)-  
Formula C<sub>15</sub>H<sub>30</sub>O, MW 226, CAS# 27829-54-5, Entry# 18947  
2,4,6-Trimethyl-11-dodecen-1-ol #

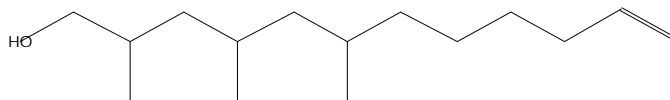

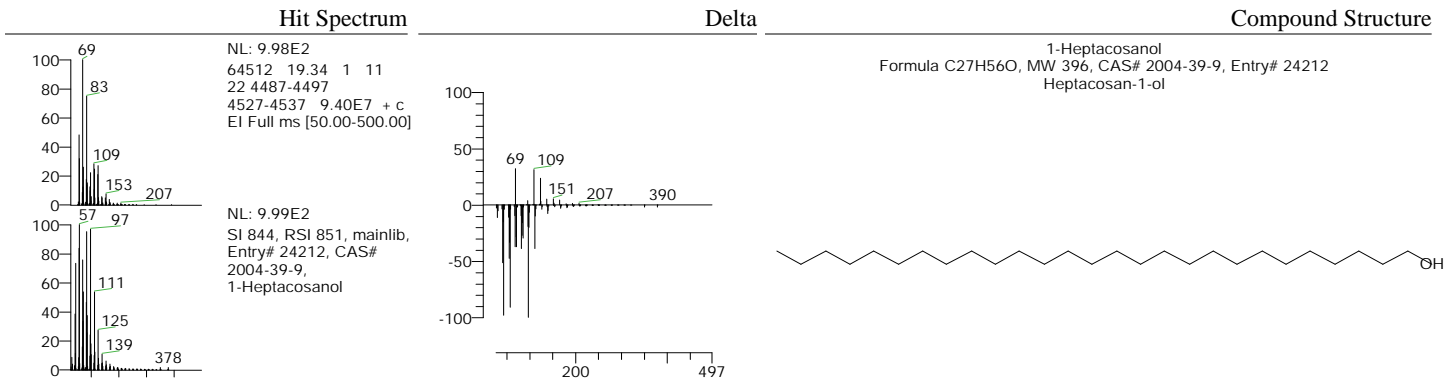

| RT    | Compound Name                                    | Area       | Area % | RSI | Cas #      | Library |
|-------|--------------------------------------------------|------------|--------|-----|------------|---------|
| 19.34 | Dodecane, 1-cyclopentyl-4-(3-cyclopentylpropyl)- | 1715550777 | 0.91   | 866 | 7225-68-5  | mainlib |
| 19.34 | 9-Hexacosene                                     | 1715550777 | 0.91   | 855 | 71502-22-2 | mainlib |
| 19.34 | 10-Heneicosene (c,t)                             | 1715550777 | 0.91   | 854 | 95008-11-0 | mainlib |

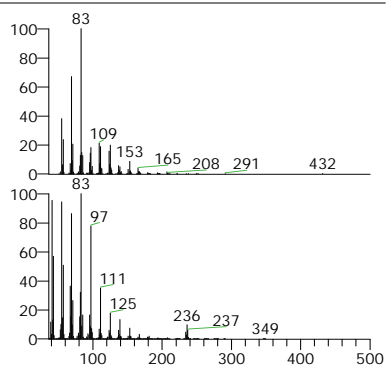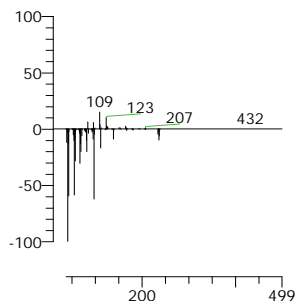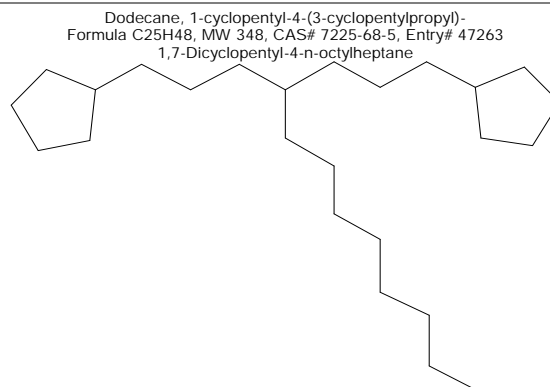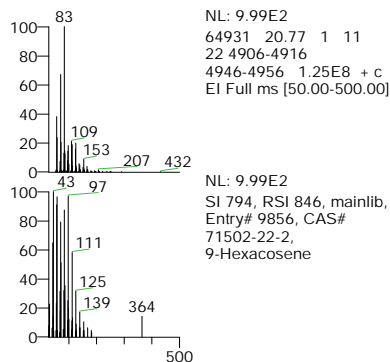

NL: 9.99E2  
64931 20.77 1 11  
22 4906-4916  
4946-4956 1.25E8 + c  
EI Full ms [50.00-500.00]

NL: 9.99E2  
SI 794, RSI 846, mainlib,  
Entry# 9856, CAS#  
71502-22-2,  
9-Hexacosene

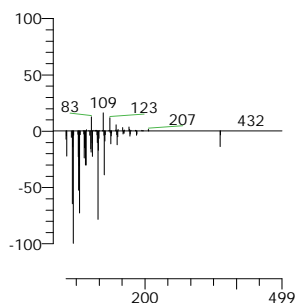

9-Hexacosene  
Formula C<sub>26</sub>H<sub>52</sub>, MW 364, CAS# 71502-22-2, Entry# 9856  
(9E)-9-Hexacosene #

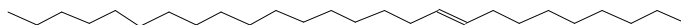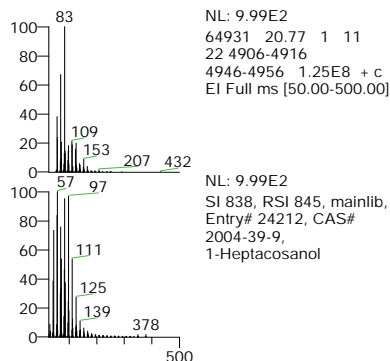

NL: 9.99E2  
64931 20.77 1 11  
22 4906-4916  
4946-4956 1.25E8 + c  
EI Full ms [50.00-500.00]

NL: 9.99E2  
SI 838, RSI 845, mainlib,  
Entry# 24212, CAS#  
2004-39-9,  
1-Heptacosanol

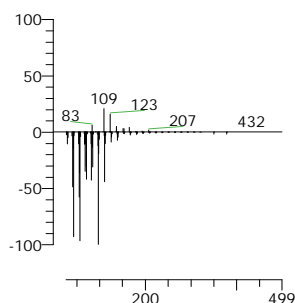

1-Heptacosanol  
Formula C<sub>27</sub>H<sub>56</sub>O, MW 396, CAS# 2004-39-9, Entry# 24212  
Heptacosan-1-ol

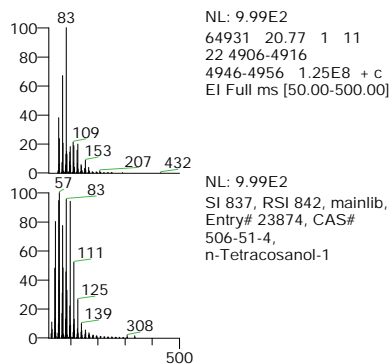

NL: 9.99E2  
64931 20.77 1 11  
22 4906-4916  
4946-4956 1.25E8 + c  
EI Full ms [50.00-500.00]

NL: 9.99E2  
SI 837, RSI 842, mainlib,  
Entry# 23874, CAS#  
506-51-4,  
n-Tetracosanol-1

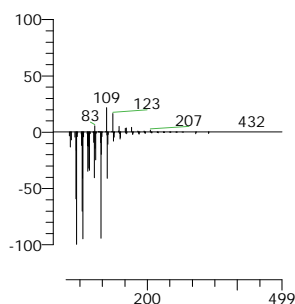

n-Tetracosanol-1  
Formula C<sub>24</sub>H<sub>50</sub>O, MW 354, CAS# 506-51-4, Entry# 23874  
Lignoceric alcohol

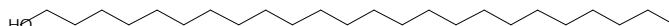

## Hit Spectrum

## Delta

## Compound Structure

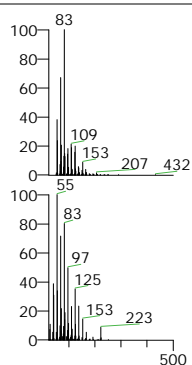

NL: 9.99E2  
64931 20.77 1 11 22  
4906-4916 4946-4956  
1.25E8 + c EI Full ms  
[50.00-500.00]

NL: 9.99E2  
SI 828, RSI 841, mainlib,  
Entry# 19454, CAS#  
1795-14-8, Cyclohexane,  
1,2,3,4,5,6-hexaethyl-

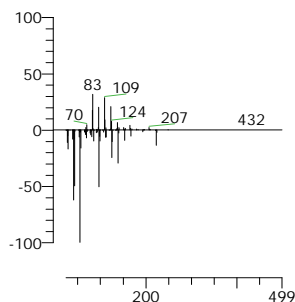

Cyclohexane, 1,2,3,4,5,6-hexaethyl-  
Formula C<sub>18</sub>H<sub>36</sub>, MW 252, CAS# 1795-14-8, Entry# 19454  
1,2,3,4,5,6-Hexaethylcyclohexane #

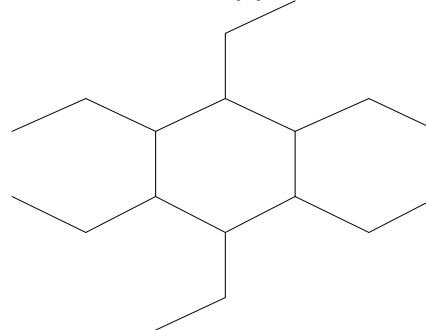

| RT    | Compound Name                                    | Area       | Area % | RSI | Cas #      | Library |
|-------|--------------------------------------------------|------------|--------|-----|------------|---------|
| 20.77 | Dodecane, 1-cyclopentyl-4-(3-cyclopentylpropyl)- | 1722927524 | 0.91   | 856 | 7225-68-5  | mainlib |
| 20.77 | 9-Hexacosene                                     | 1722927524 | 0.91   | 846 | 71502-22-2 | mainlib |
| 20.77 | 1-Heptacosanol                                   | 1722927524 | 0.91   | 845 | 2004-39-9  | mainlib |

Analysed By:

Checked By:
